# Supplementary material for: Lyn and Fyn function as molecular switches that control immunoreceptors to direct homeostasis or inflammation
Source: PubMed Central journal article supplement (PMC5557797; doi:10.1038/s41467-017-00294-0), 2017-08-15
Supplement: 41467_2017_294_MOESM1_ESM.pdf [file 41467_2017_294_MOESM1_ESM.pdf]

File Name: Supplementary Information

Description: Supplementary Figures, Supplementary Tables and Supplementary References

### Supplementary Table 1.

Related primers and probe sequences used for RT-qPCR were:

| Gene           | Accession Number |   | 5'-3' Sequence                | Location  |
|----------------|------------------|---|-------------------------------|-----------|
| IL6            | NM_031168        | F | TCCTACCCCAATTTCCAATGC         | 526-546   |
|                |                  | R | TGAATTGGATGGTCTTGGTCCT        | 608-587   |
|                |                  | P | CAGATAAGCTGGAGTCACAGAAGGAGTGG | 555-583   |
| MIP2           | NM_009140        | F | TGACTTCAAGAACATCCAGATCTT      | 181-204   |
|                |                  | R | CTTGAGAGTGGCTATGACTTCTGTCT    | 262-237   |
|                |                  | P | TGACGCCCCCAGGACCCCA           | 210-228   |
| MCP1           | NM_011333        | F | CTTCTGGGCCTGCTGTTCA           | 107-125   |
|                |                  | R | CCAGCCTACTCATTGGGATCA         | 233-213   |
|                |                  | P | CTCAGCCAGATGCAGTTAACGCCCC     | 160-180   |
| KC             | NM_008176        | F | TCCCCAAGTAACGGAGAAAGAA        | 282-303   |
|                |                  | R | TGTCAGAAGCCAGCGTTCAC          | 350-331   |
|                |                  | P | AGACTGCTCTGATGGCACCGTCT       | 307-329   |
| TGF- $\beta$   | NM_011577        | F | TGACGTCACTGGAGTTGTACGG        | 1610-1630 |
|                |                  | R | GGTTCATGTCATGGATGGTGC         | 1461-1482 |
|                |                  | P | TTCAGCGCTCACTGCTCTTGTGACAG    | 1522-1547 |
| $\beta$ -actin | NM_007393        | F | AGAGGGAAATCGTGCGTGAC          | 694-713   |
|                |                  | R | CAATAGTGATGACCTGGCCGT         | 831-811   |
|                |                  | P | CACTGCCGCATCCTCTTCCTCCC       | 764-786   |

Gene, accession number, sequence and location of primers and probes. F indicates a forward primer, R indicates a reverse primer, and P indicates a FAM-TAMRA probe.

**Supplementary Table 2.**

| Name of the gene              | Target DNA sequence (5'-3') | Catalog #  |
|-------------------------------|-----------------------------|------------|
| <i>LYN</i>                    | CACTGTTATTAACAGATAATA       | SI00605577 |
| <i>FYN</i>                    | CTCAGAATGTATGTCCCAGAA       | SI00605451 |
| <i>SYK</i>                    | CCCGCTCTTAAAGATGAGTTA       | SI02223144 |
| <i>PTPN6</i>                  | CCGGAACAAATGCGTCCCATA       | SI02658726 |
| <i>PKC<math>\alpha</math></i> | ATGAACTGTTTCAGTCTATAA       | SI02738190 |
|                               | CAGGAGCAAGCACAAGTTCAA       | SI02713634 |
|                               | CAGCTGGTCATTGCTAATATA       | SI01388604 |
|                               | AAGCATTATCTTAGTGGATGA       | SI01388583 |
| <i>HCK</i>                    | CCGGGATAGCGAGACCACTAA       | SI02665327 |
|                               | CGGCAGGGAGATACCGTGAAA       | SI02665320 |
|                               | CGGGAGCACATCAGAGGCTTA       | SI02659986 |
|                               | CCCAGGGATGTCAAACCCTGA       | SI04435312 |
| <i>FGR</i>                    | CACCACACGGGTTTCAGTTCAA      | SI03057047 |
|                               | CACGTGGAACGGCAGCACTAA       | SI02634807 |
|                               | TTGATTCTGTAAATAAGTAAA       | SI00074494 |
|                               | CAGACCTTGTCTAGTTATTTA       | SI00074473 |
| Control siRNA                 | AATTCTCCGAACGTGTCACGT       | SI03650325 |

Predesigned HP GenomeWide (Qiagen, Courtaboeuf, France) siRNAs

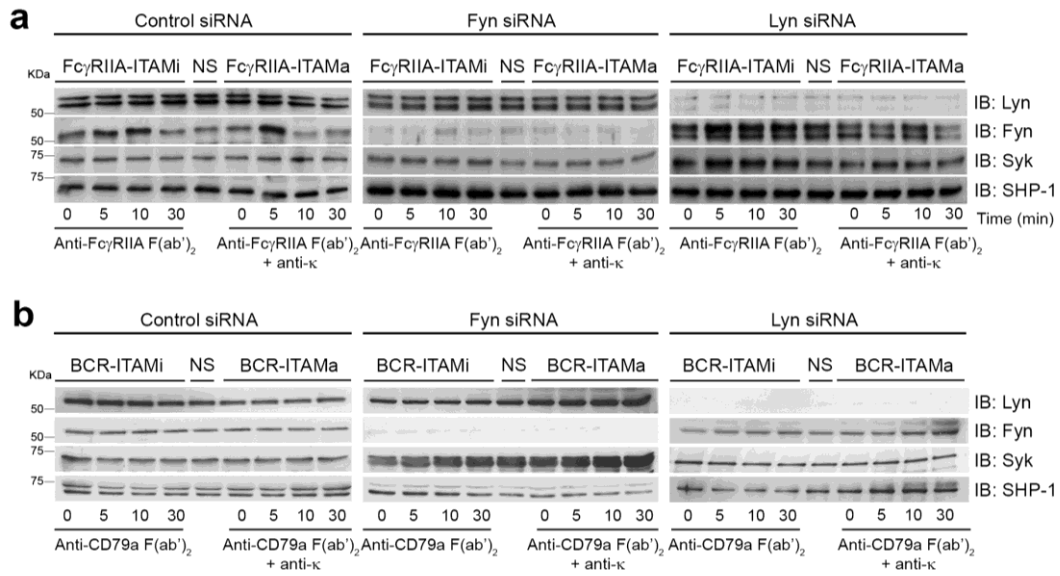

**Supplementary Figure 1. Immunoblotting analysis of total kinase or phosphatase protein contents in cell lysates presented in Figure 1a.** After induction of Fc $\gamma$ RIIA- or BCR-ITAMi or ITAM signalling in THP-1-CD14<sup>+</sup>-Fc $\gamma$ RIIA<sup>+</sup> cells (a) and Ramos (b) transfected with indicated siRNAs, cells were lysed, lysates subjected to SDS-PAGE and immunoblots (IB) were performed using indicated Abs. NS: not stimulated.



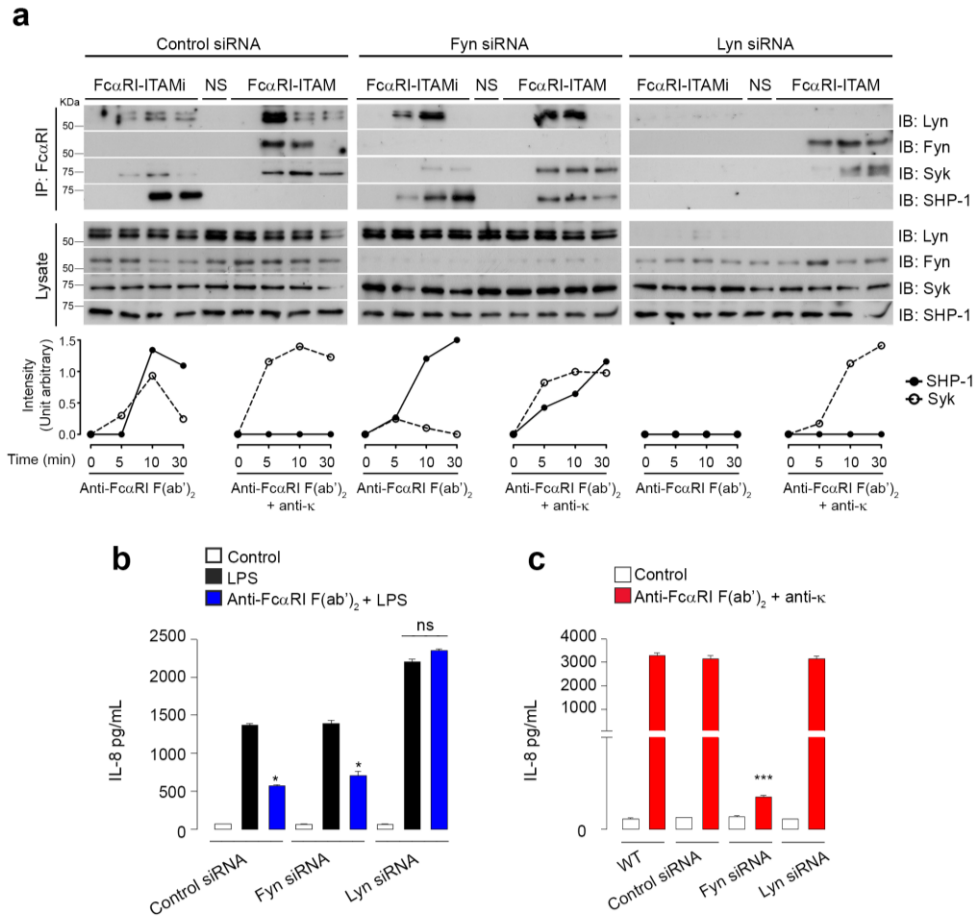

**Supplementary Figure 2. Differential regulation of Fc $\alpha$ RI-ITAM signals by Lyn and Fyn.** (a) After induction of Fc $\alpha$ RI-ITAMi or ITAM signalling in transfected THP-1 cells, immunoprecipitation (IP) and immunoblots (IB) were performed with indicated Abs. Quantification of the indicated band using ImageJ software relative to total corresponding protein levels in cell lysates is indicated at the bottom of each panel, representing one out of at least three experiments. (b) Modulation of LPS-mediated IL-8 production by Lyn and Fyn during Fc $\alpha$ RI-ITAMi induction. THP-1 cells transfected with indicated siRNAs were stimulated for 30 min to induce ITAMi signal followed by stimulation with LPS (10 ng/ml) for 1 h. Supernatant was collected for cytokine measurement. (c) Modulation of IL-8 production by Lyn and Fyn during Fc $\alpha$ RI-ITAM induction for 18 h. Data are presented as the mean  $\pm$  s.e.m. \*\*\* $P$ <.001; Student's unpaired t-test.

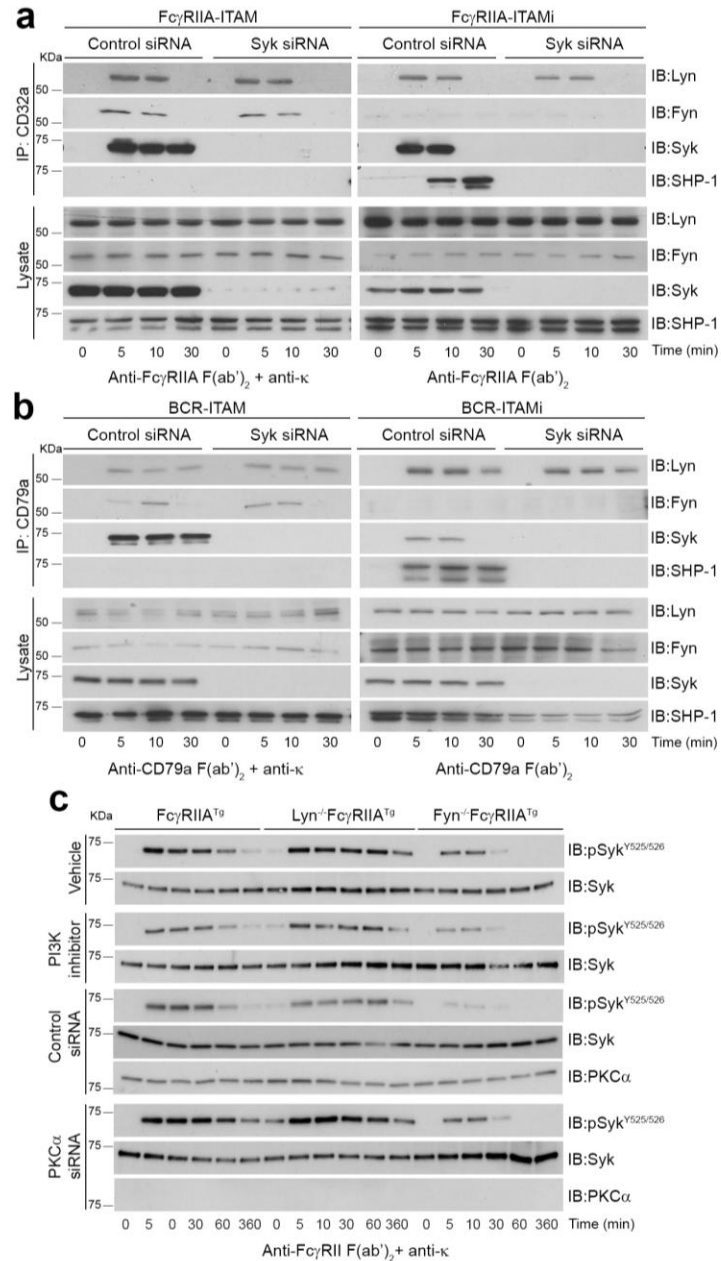

**Supplementary Figure 3. Syk is essential for ITAMi signalling but not for Src kinase recruitment.** (a) After induction of Fc $\gamma$ RIIA-ITAMi or ITAM signalling in THP-1-CD14 $^{+}$ -Fc $\gamma$ RIIA $^{+}$  cells transfected with indicated siRNAs, immunoprecipitation (IP) and immunoblots (IB) were performed with indicated Abs. Corresponding protein levels in cell lysates are shown in the bottom. (b) After induction of BCR-ITAMi or ITAM signalling in transfected Ramos B cells, immunoprecipitation (IP) and immunoblots (IB) were performed with indicated Abs. Corresponding protein levels in cell lysates are shown at the bottom of each panel. (c) After induction of Fc $\gamma$ RIIA-mediated ITAM signals, BMM derived from Fc $\gamma$ RIIA transgenic mice or from Fc $\gamma$ RIIA $^{Tg}$  under Lyn $^{-/-}$  or Fyn $^{-/-}$  backgrounds were either treated with PI3K inhibitor or transfected with indicated siRNAs. Cell lysate samples were subjected to SDS-PAGE and immunoblots were performed using an anti-phospho (p) Syk (Y525/526) Ab. Corresponding protein levels in cell lysates are shown at the bottom of each panel. Data are representative of three experiments.

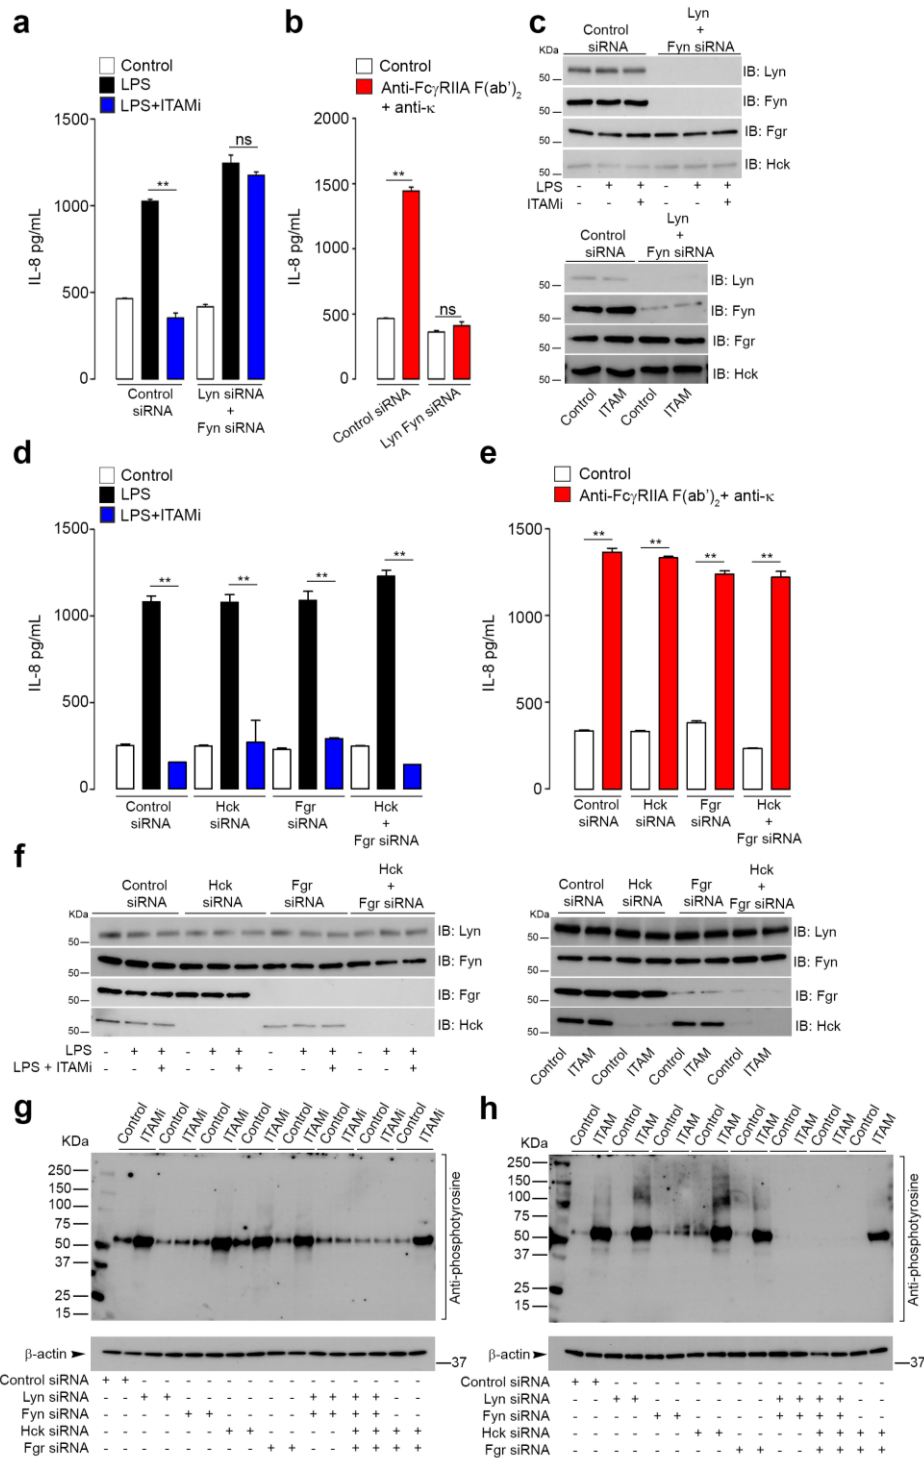

**Supplementary Figure 4. Lyn and Fyn, but not Hck or Fgr, are essential in the control of the balance between ITAM and ITAMi signals.** (a) THP-1-CD14<sup>+</sup>-Fc $\gamma$ RIIA<sup>+</sup> cells transfected with indicated siRNAs were stimulated for indicated time points to induce ITAMi signal followed by stimulation with or without LPS (10 ng/ml) for 1 h. Then, supernatant was collected for cytokine measurement. (b) THP-1-CD14<sup>+</sup>-Fc $\gamma$ RIIA<sup>+</sup> cells transfected with indicated siRNAs were stimulated for indicated time points to induce ITAM signal for 18 hours. Data are presented as the mean  $\pm$  s.e.m. \*\*\* $P$ <.001; Student's unpaired t-test. (c) THP-1-CD14<sup>+</sup>-Fc $\gamma$ RIIA<sup>+</sup> cells transfected with indicated siRNAs were stimulated for indicated time points to induce either ITAMi or ITAM signals followed by stimulation with or without LPS (10 ng/ml) for 1 h. Then, cell lysates were subject to immunoblot analysis using the indicated antibodies. (d) Absence of modulation of LPS-mediated IL-8 production by Hck and Fgr during Fc $\gamma$ RIIA-ITAMi induction. THP-1-CD14<sup>+</sup>-Fc $\gamma$ RIIA<sup>+</sup> cells transfected with indicated siRNAs were stimulated for indicated time points to induce either ITAMi signals followed by stimulation with or not by LPS (10 ng/ml) for 1 h. Then, supernatant was collected for cytokine measurement. (e) Absence of modulation of IL-8 production by Hck and Fgr during Fc $\gamma$ RIIA-ITAM induction for 18 hours. Data are presented as the mean  $\pm$  s.e.m. \*\*\* $P$ <.001; Student's unpaired t-test. (f) THP-1-CD14<sup>+</sup>-Fc $\gamma$ RIIA<sup>+</sup> cells transfected with indicated siRNAs were stimulated for 30 min to induce ITAMi (left) signals followed by stimulation with or without LPS (10 ng/ml) for 1 h, or for 18 h for ITAM (right) induction. Then, cell lysates were subject to immunoblot analysis using the indicated antibodies. (g and h) After induction of ITAMi (g) or ITAM (h) as described in a and b, siRNA-transfected THP-1-CD14<sup>+</sup>-Fc $\gamma$ RIIA<sup>+</sup> cell lysates were subject to SDS-4-16% PAGE followed by immunoblot analysis using an anti-phosphotyrosine antibody. Molecular weight are indicated on the left of each panel. Data are representative of three experiments.

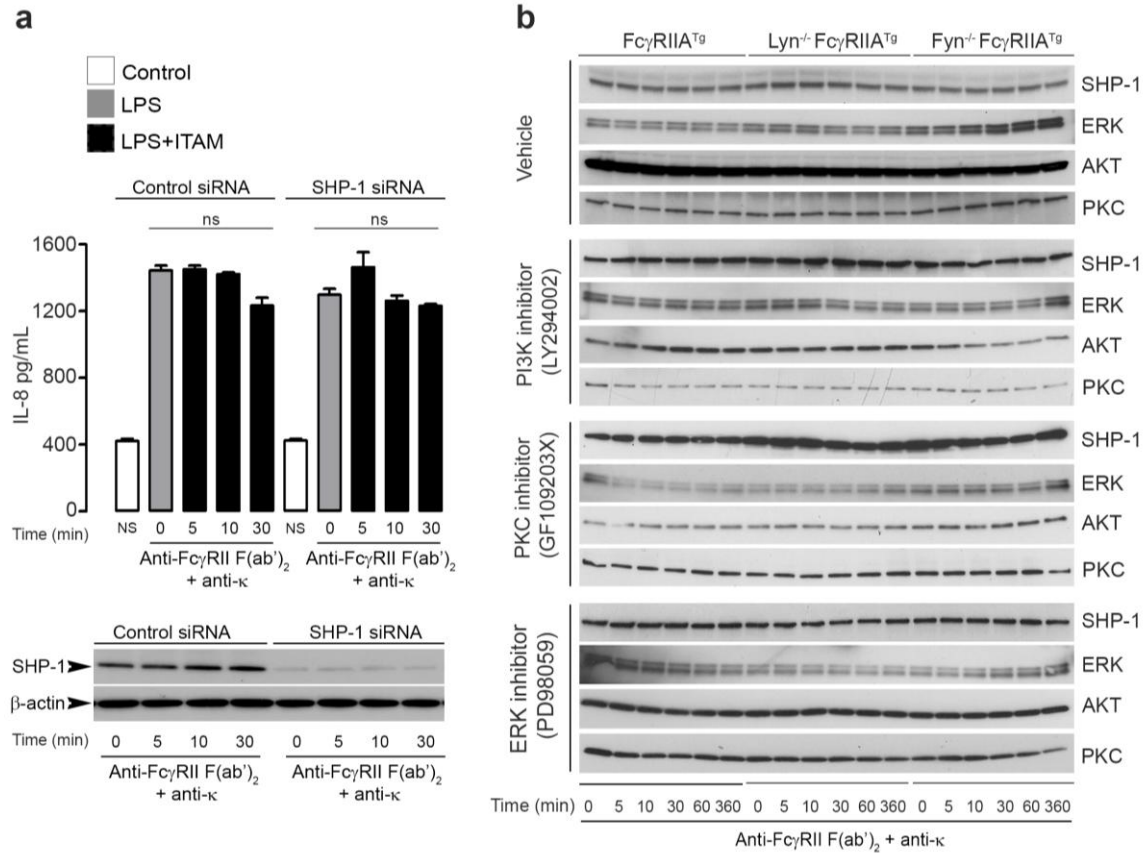

**Supplementary Figure 5. Immunoblotting analysis of total kinase or phosphatase protein contents in cell lysates presented in Figure 3c. (a)** Modulation of LPS-mediated IL-8 production by SHP-1 silencing after induction of Fc $\gamma$ RIIA-ITAM signal in THP-1-CD14<sup>+</sup>-Fc $\gamma$ RIIA<sup>+</sup> cells transfected with indicated siRNAs. Cells were stimulated with LPS for 1 h at 37°C after induction of ITAM and IL-8 was measured in the supernatant as described in Figure 1b. Data are presented as the mean  $\pm$  s.e.m.; ns, not significant; Student's unpaired t-test. **(b)** BMM derived from Fc $\gamma$ RIIA transgenic mice or from Fc $\gamma$ RIIA<sup>Tg</sup> under Lyn- or Fyn-deficient backgrounds were incubated overnight with PI3K, PKC and ERK inhibitors or with vehicle, followed by induction of Fc $\gamma$ RIIA-mediated ITAM signals. BMM lysate samples were subjected to SDS-PAGE followed by immunoblotting (IB) using indicated Abs.

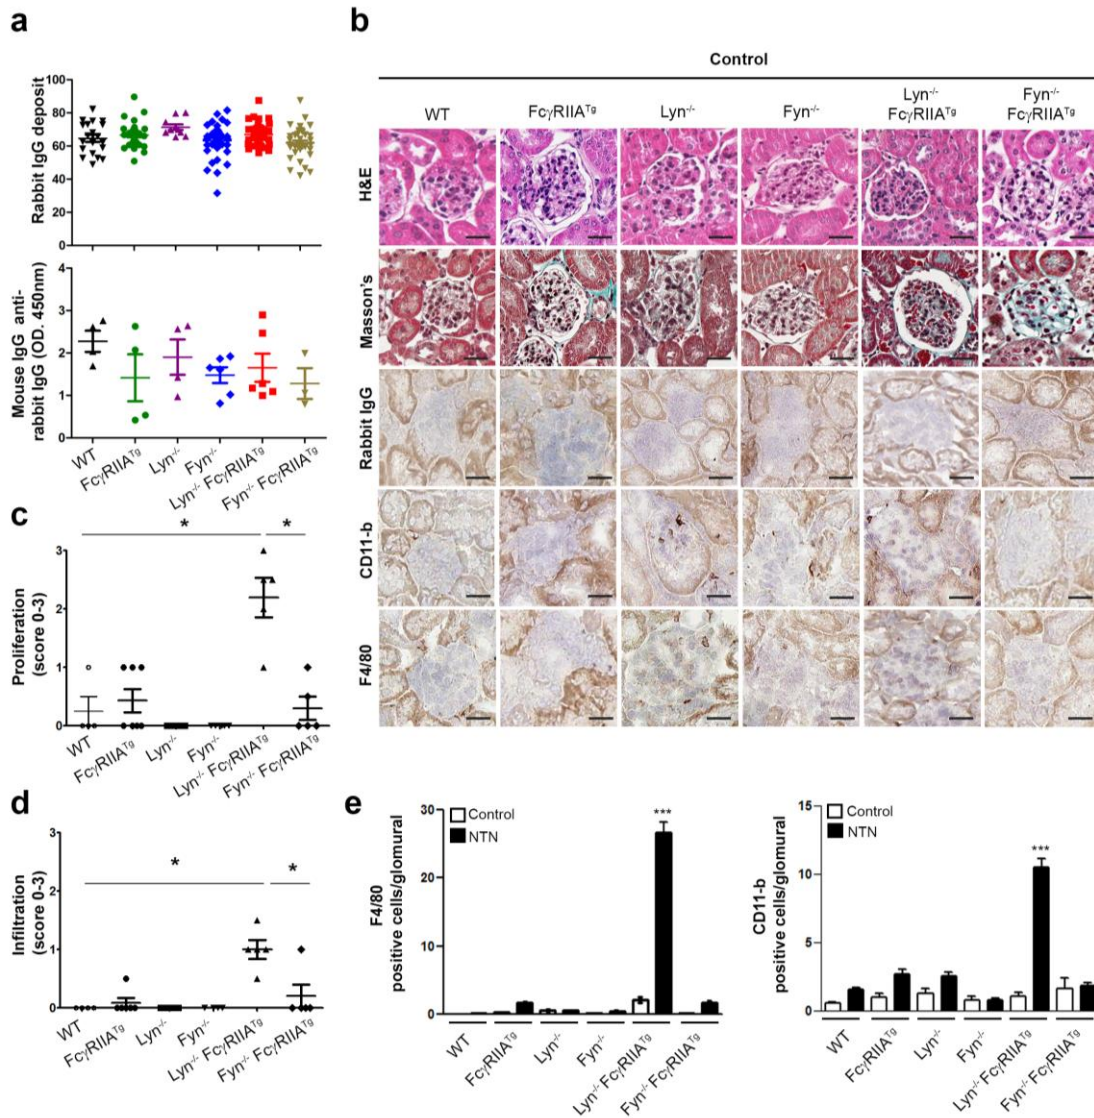

**Supplementary Figure 6. Effect of SFK deficiency on nephritis development following NTN mouse model induction.** (a) Quantification of rabbit IgG deposits on the kidney sections after NTN induction. Sections of five animals/group were automatically quantified with the software CaloPix piloted by an independent pathologist. Proteinuria after NTN injection in indicated strains of mice. (b) Circulating levels of CII-specific antibodies in individual sera from WT and Fc $\gamma$ RII<sup>Tg</sup> on different background mice as indicated. (n=3) at day 6. Means  $\pm$  s.e.m. (c, top) H&E and fibrosis Masson's stain of kidney sections from representative mice. Scale bars: 200  $\mu$ m. (c, bottom) Immunostaining of CD11b and F4/80 in kidney sections of indicated strains of mice. Bars: 200  $\mu$ m. (d) Quantification of glomerular cell proliferation and leukocyte infiltration by an independent renal pathologist. \* $P$ <.05; Mann-Whitney test. Data are presented as the mean  $\pm$  s.e.m (n=8 or 10). (e) Quantification of positive cells for F4/80 and CD11b, respectively (\* $p$ <.01; two-way ANOVA test). Sections of five animals/group were automatically quantified with the software CaloPix piloted by an independent pathologist.



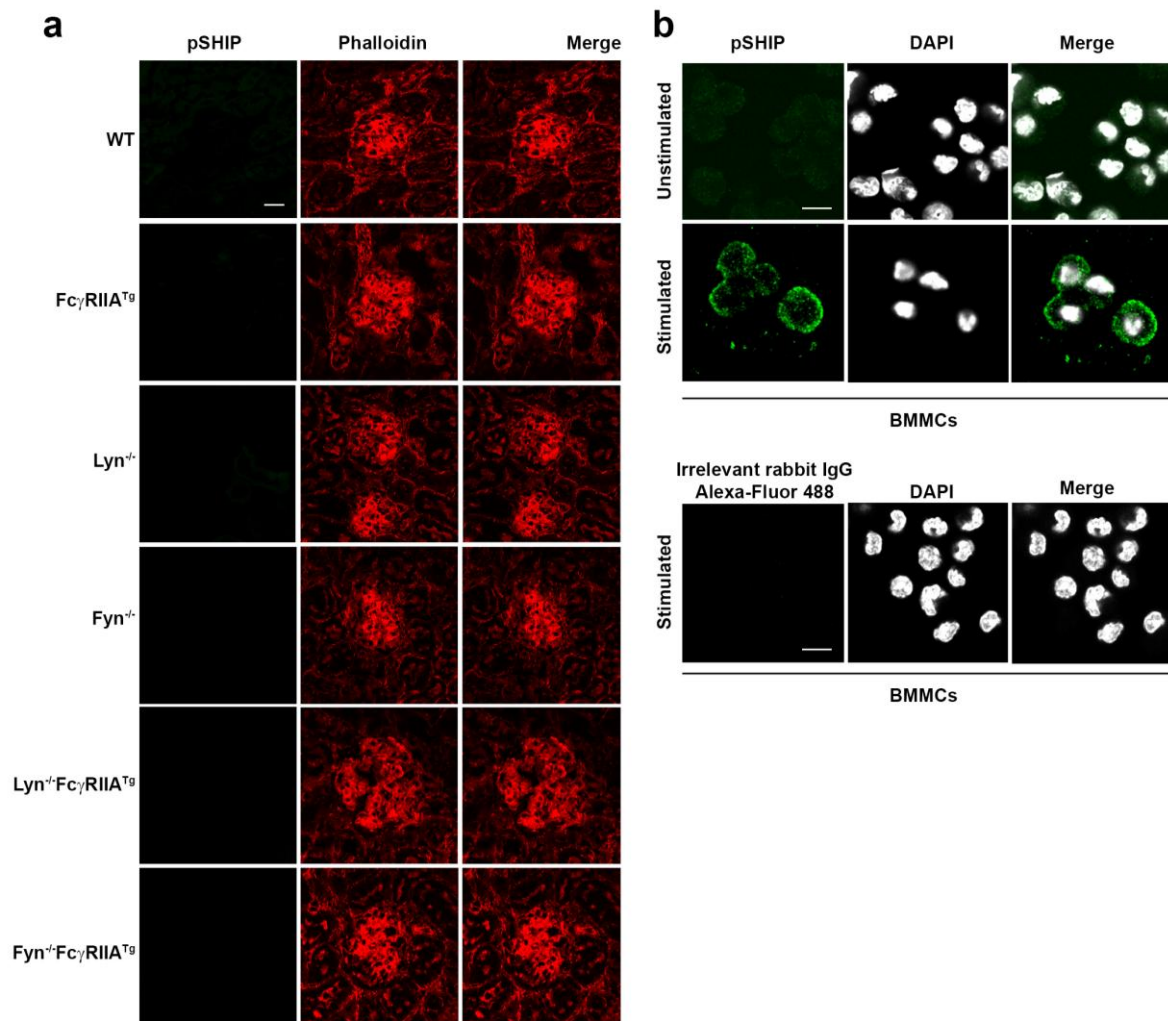

**Supplementary Figure 7. Absence of pSHIP activation on the glomerular area following NTN induction.** (a) Immunofluorescence staining on frozen kidney tissues from indicated mice 6 days after NTN induction using Alexa Fluor 488 conjugated anti-pSHIP antibody or Alexa Fluor 547 conjugated anti-phalloidin to identify the glomeruli. (b) Positive control for the Alexa Fluor 488 conjugated anti-pSHIP antibody using bone marrow derived mouse mast cells (BMMCs). Cells were stimulated or not for 5 min with pre-formed immune complexes containing 2.4G2 mAb rat anti-mouse Fc $\gamma$ R2/3 ( $\kappa$  chain<sup>+</sup>), mouse monoclonal IgE ( $\kappa$  chain<sup>+</sup>), and anti- $\kappa$  chain (rat + mouse) polyclonal antibody. Data are representative of four experiments.

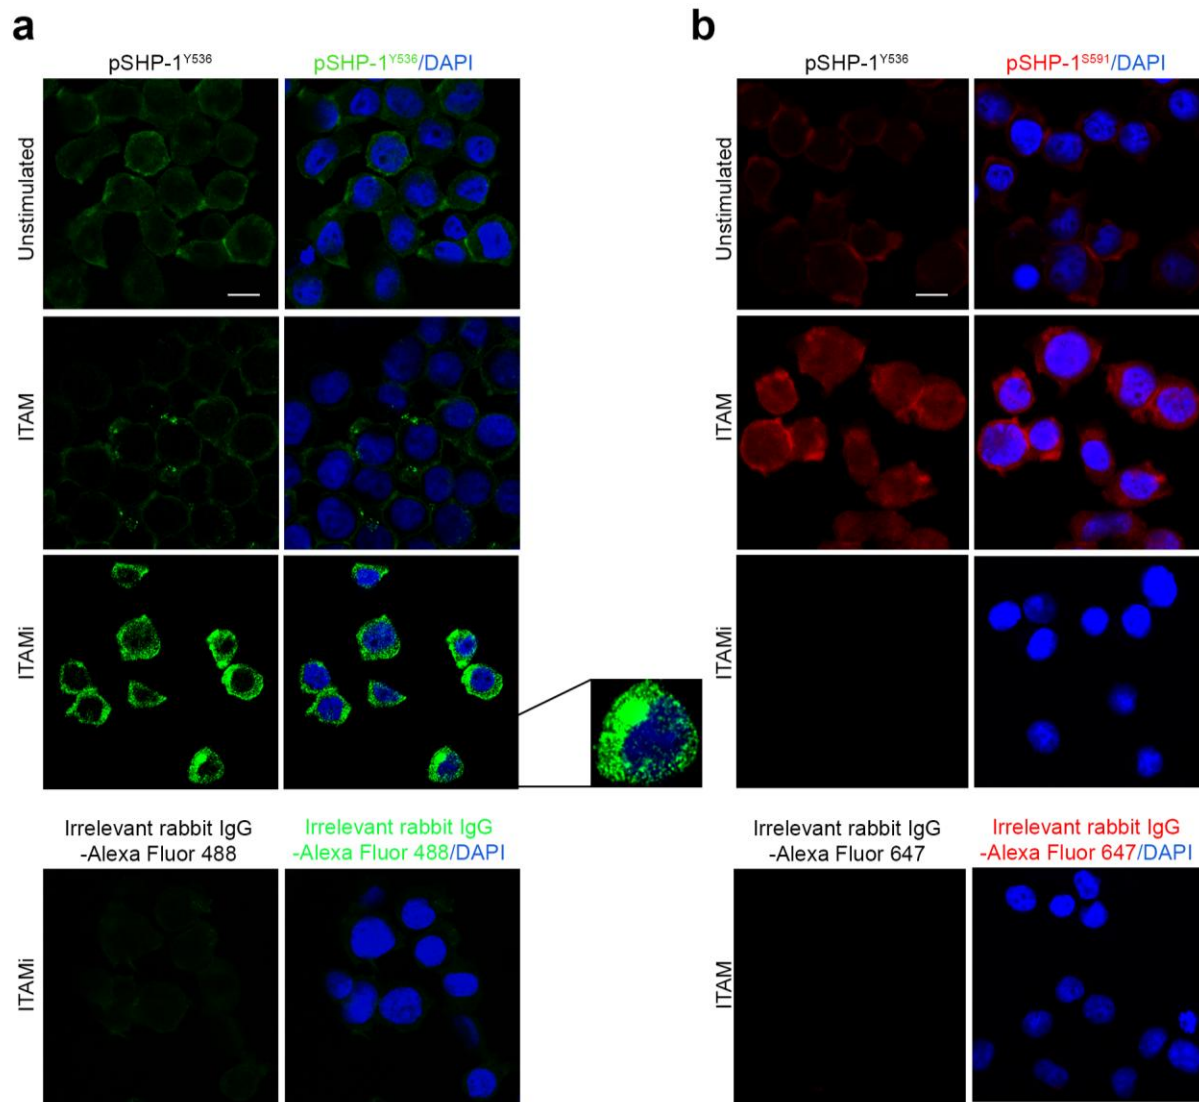

**Supplementary Figure 8. Detection of pSHP-1<sup>Y536</sup> and pSHP-1<sup>S591</sup> on THP-1 CD32A<sup>+</sup> cells by immunofluorescence.** Unstimulated or stimulated cells were cytopspined, fixed and stained with Alexa Fluor 488 anti-pSHP-1<sup>Y536</sup> or anti-SHP-1<sup>S591</sup>, or with DAPI. **(a)** A positive staining for anti-pSHP-1<sup>Y536</sup> was observed in cells stimulated for 1h by IV.3 F(ab')<sub>2</sub> (FcγRIIA-ITAMi conditions), but not under FcγRIIA-ITAM conditions (IV.3 F(ab')<sub>2</sub> plus anti-κ chain F(ab')<sub>2</sub>). Insert indicates ITAMi intracellular inhibisome clusters as described previously<sup>1</sup>. **(b)** On the contrary, positive staining with anti-pSHP-1<sup>S591</sup> was observed after FcγRIIA-ITAM induction. This was representative of three experiments.

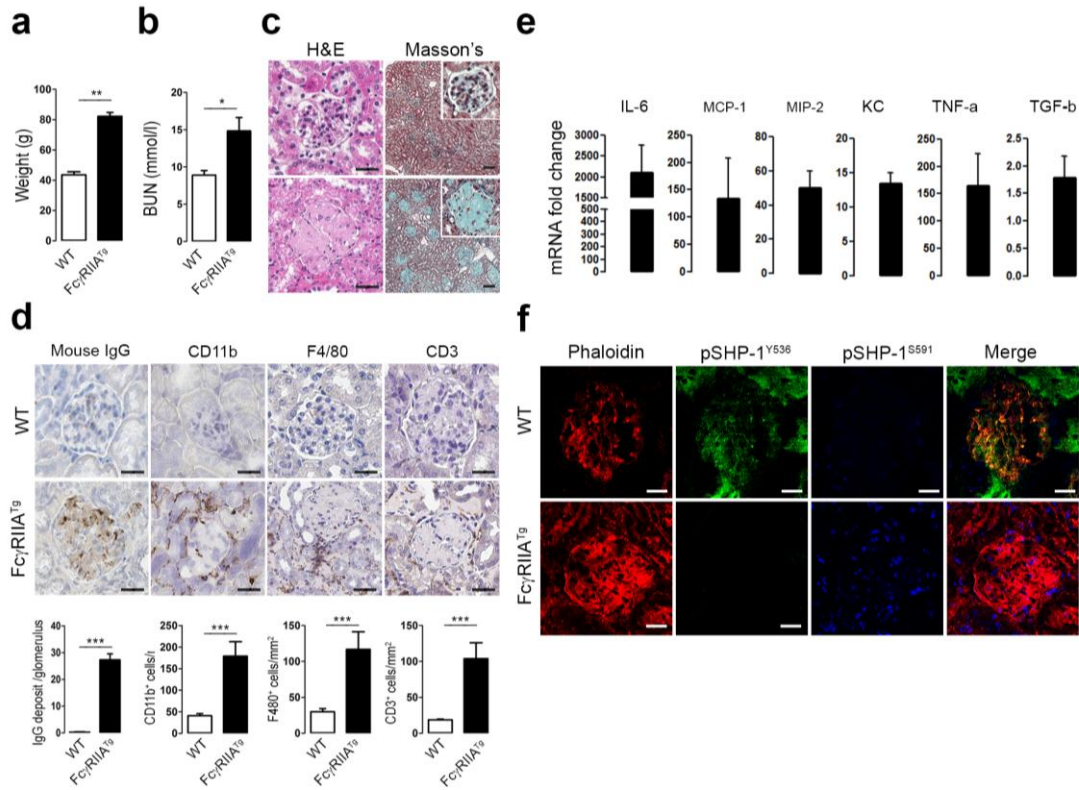

**Supplementary Figure 9. Glomerular in situ SHP-1<sup>S591</sup> phosphorylation is associated with spontaneous development of severe autoimmune nephritis in Fc $\gamma$ RIIA<sup>Tg</sup> mice.** (a) Body weight. (b) Serum BUN. (c) Representative photographs of 1 year-old mice showing severe glomerulopathy with marked fibrosis. Scale Bars: 200  $\mu$ m. (d) Detection of mouse IgG, CD11b<sup>+</sup>, F4/80<sup>+</sup> and CD3<sup>+</sup> cells in kidney sections of indicated mice. Quantification of positive cells is indicated on the bottom. Scale Bars: 200  $\mu$ m. (\* $P$ <.01; Mann-Whitney test). Sections of five animals/group were automatically quantified with the software CaloPix piloted by an independent pathologist. (e) Relative mRNA expression of the indicated cytokines assessed by q-PCR on independent kidney tissue RNA samples (n = 5). \* $P$ <.05, \*\* $P$ <.01, \*\*\* $P$ <.001; Mann-Whitney test. ns, non significant. Data are presented as the mean  $\pm$  s.e.m (n=5). (f) Representative photomicrographs of glomeruli stained for phalloidin (red), p-SHP-1<sup>S591</sup>-Alexa 647 (blue) and p-SHP-1<sup>Y536</sup>-Alexa 488 (green). Scale bars: 200  $\mu$ m.



**Supplementary Figure 10:** All uncut Western blots for each figure panel are included below

Figure 1a

IP:FcγRIIA, IB: Lyn (control siRNA)

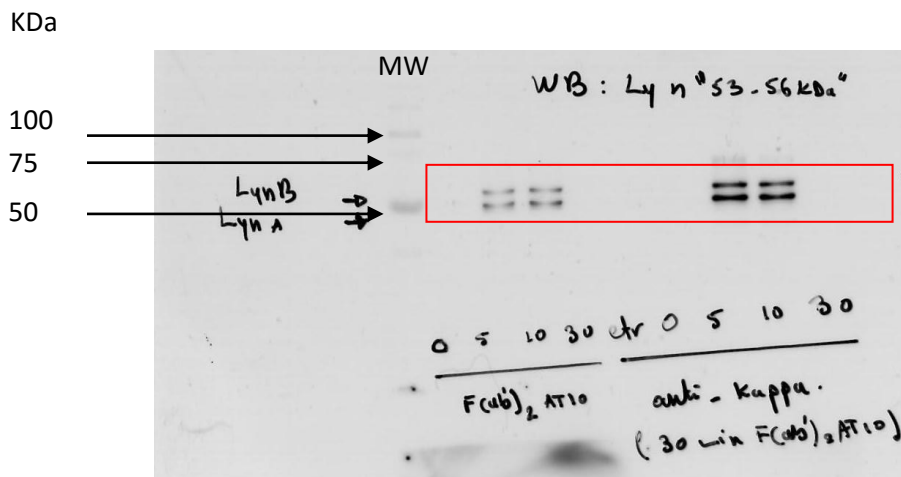

MW: Molecular Weight

Figure 1a

IP:FcγRIIA, IB: Syk (control siRNA)

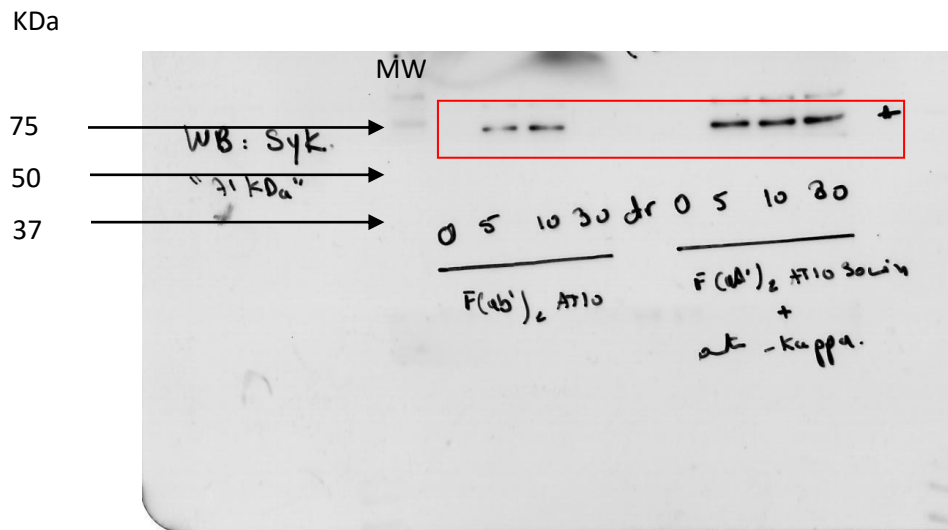

MW: Molecular Weight

Figure 1a

IP:FcγRIIA, IB:SHP1 (control siRNA)

KDa

75

50

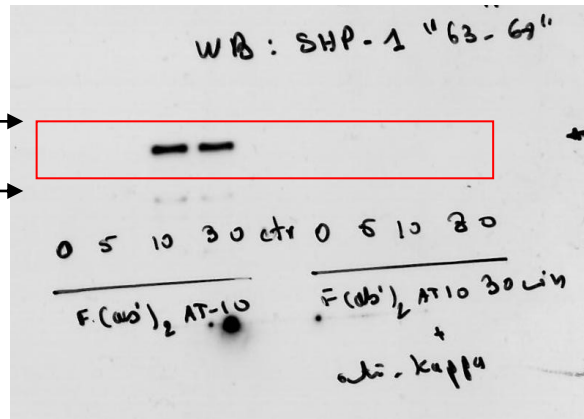

Figure 1a

IP:FcγRIIA, IB:Fyn (control siRNA)

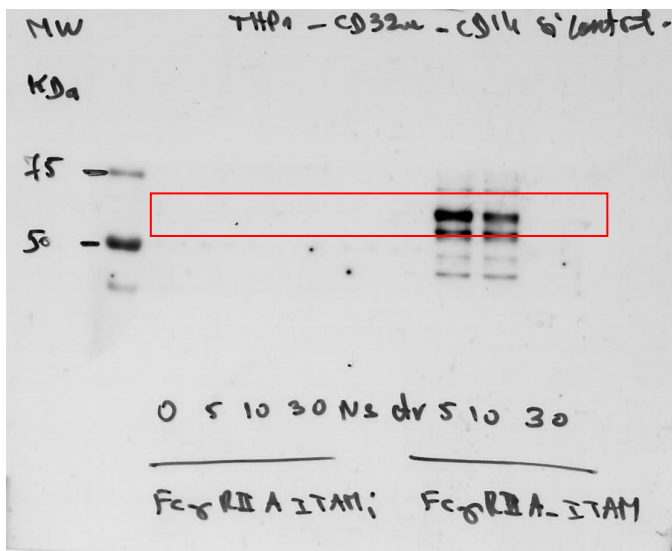

# Figure 1a

IP: FcγRIIA, IB:SHP-1 (Fyn siRNA)

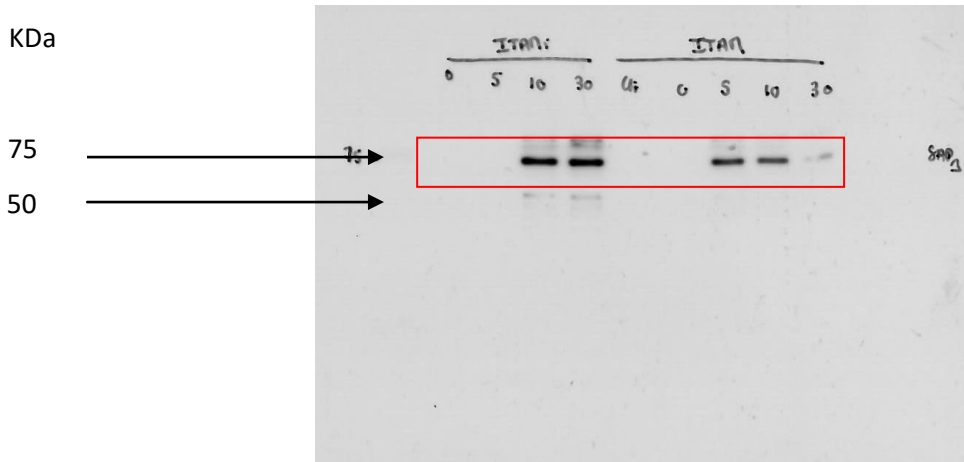

# Figure 1a

IP: FcγRIIA, IB:SHP-1 (Lyn siRNA)

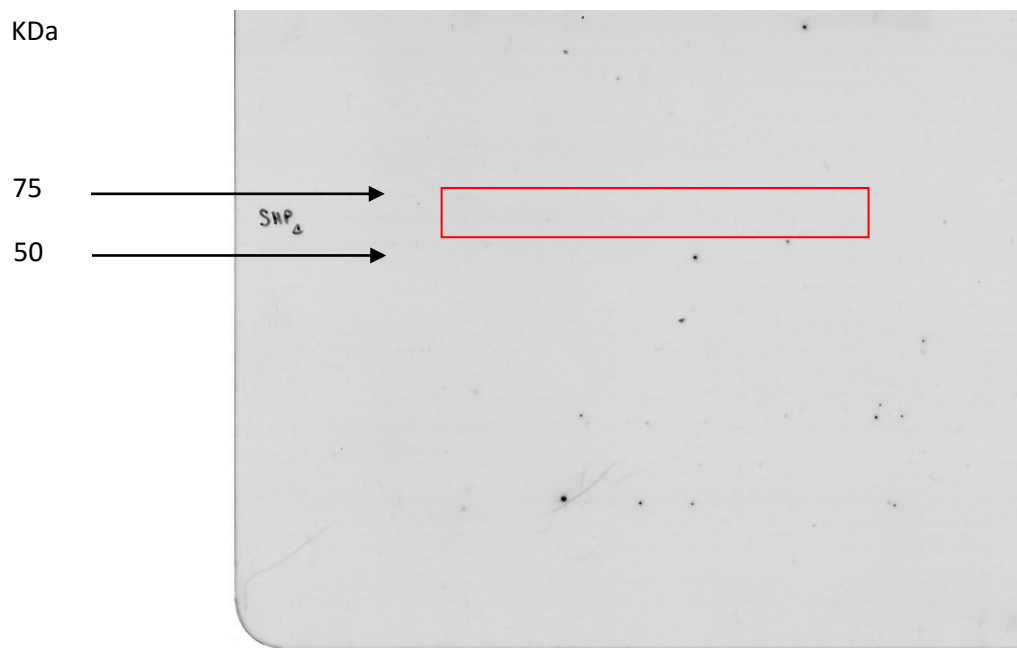



Figure 1a

IP: FcγRIIA, IB: Lyn (Lyn siRNA)

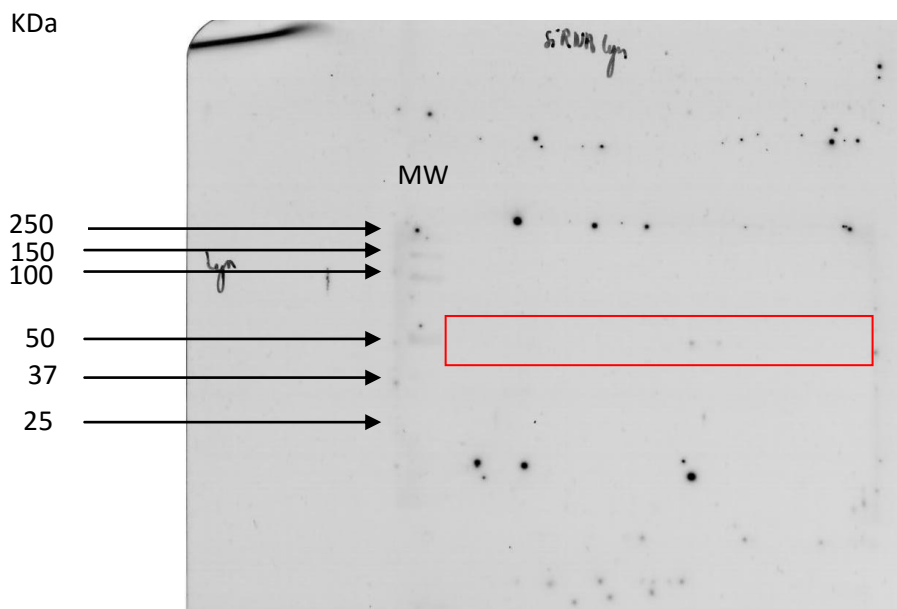





# Figure 1a

IP: FcγRIIA, IB: Lyn (Fyn siRNA)

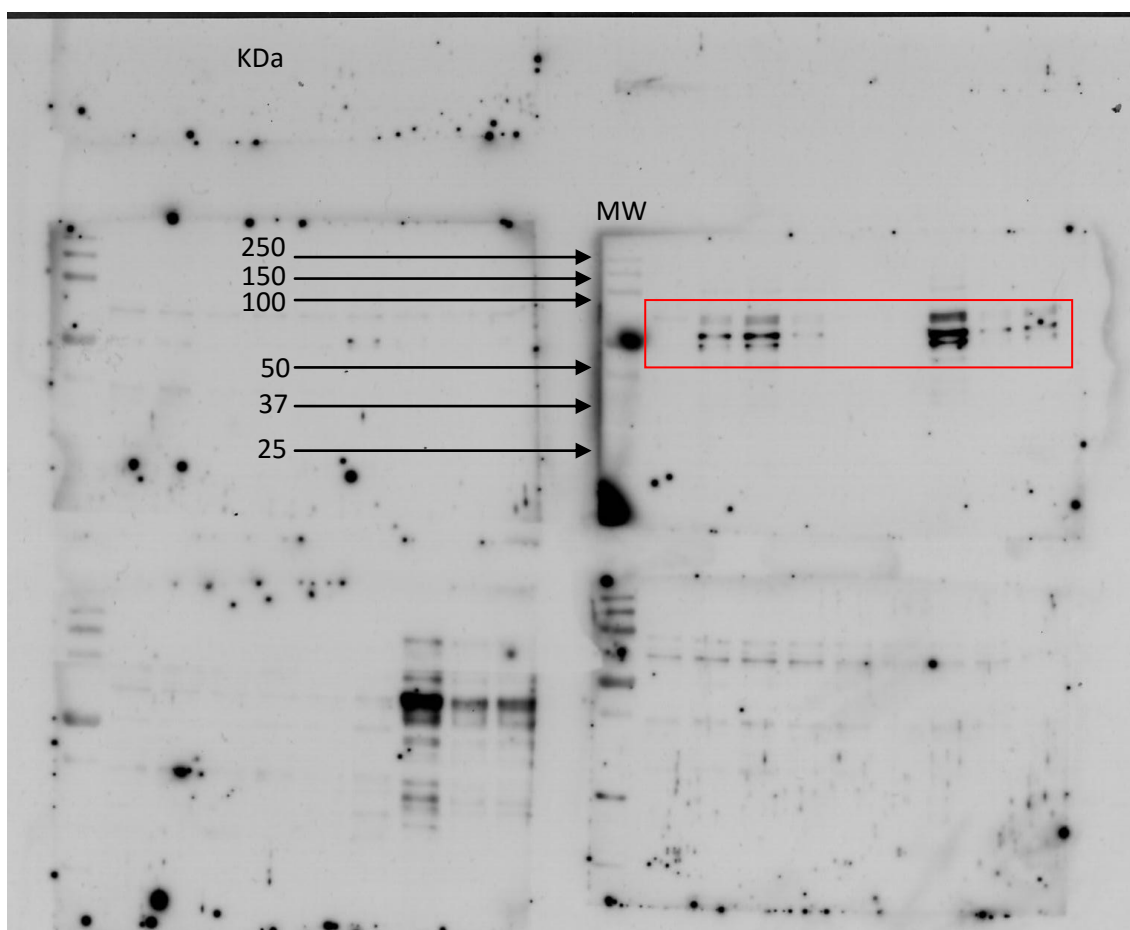

Figure 1a

IP: FcγRIIA, IB: Fyn (Fyn siRNA)

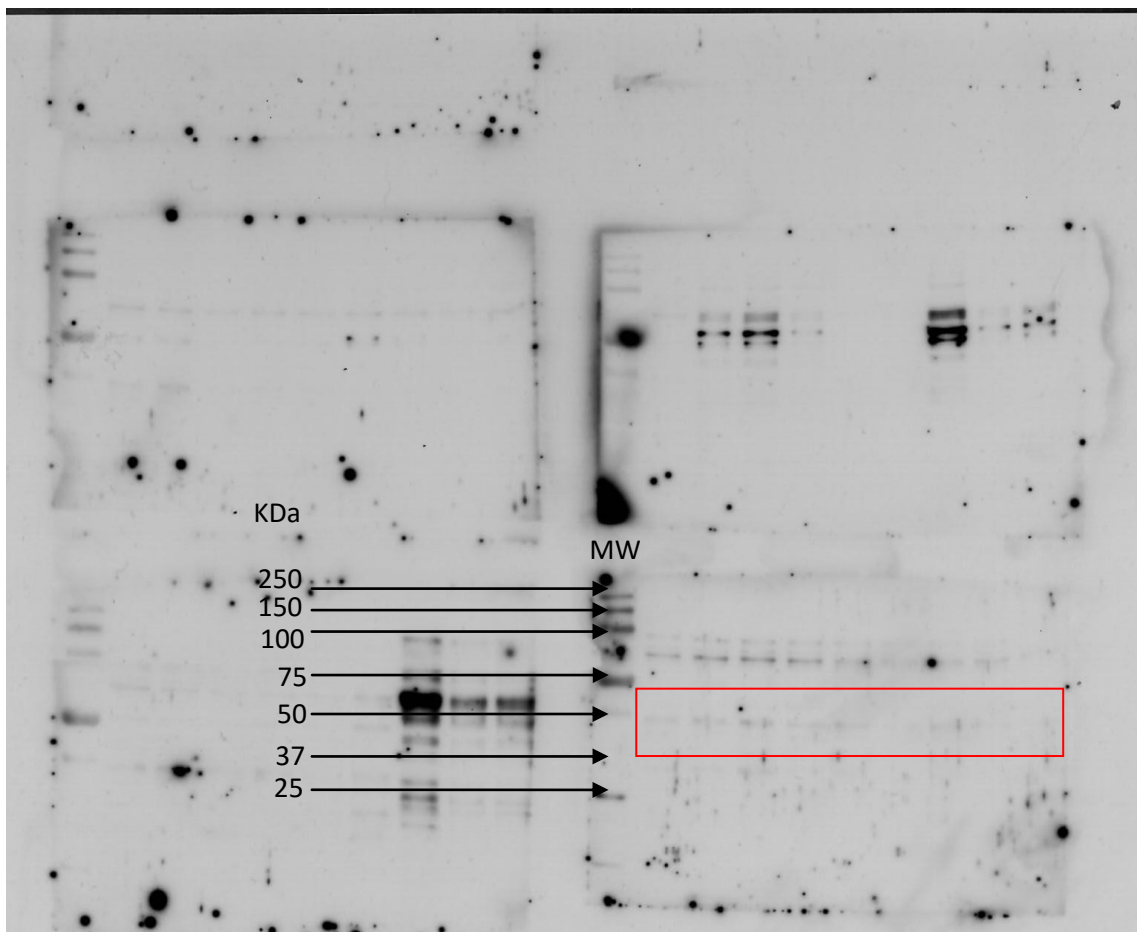

# Figure 1a

IP: FcγRIIA, IB: Fyn (Lyn siRNA)

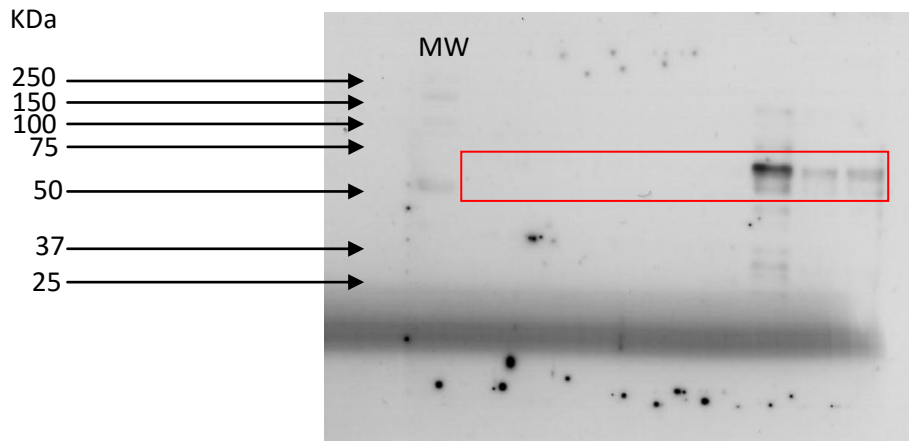

Figure 2a

IP: CD79a, IB: Fyn (Control siRNA)

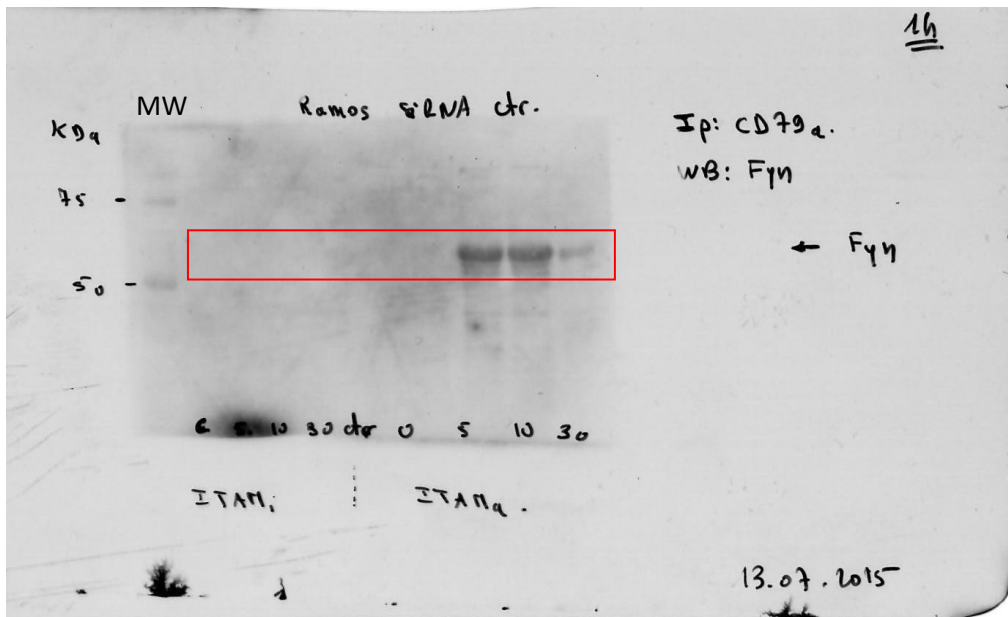

Figure 2a

IP: CD79a, IB: Lyn (Fyn siRNA)

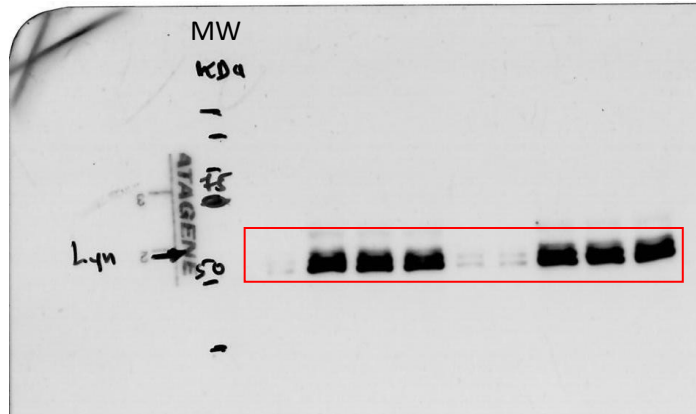

Figure 2a

IP: CD79a, IB: Fyn (Fyn siRNA)

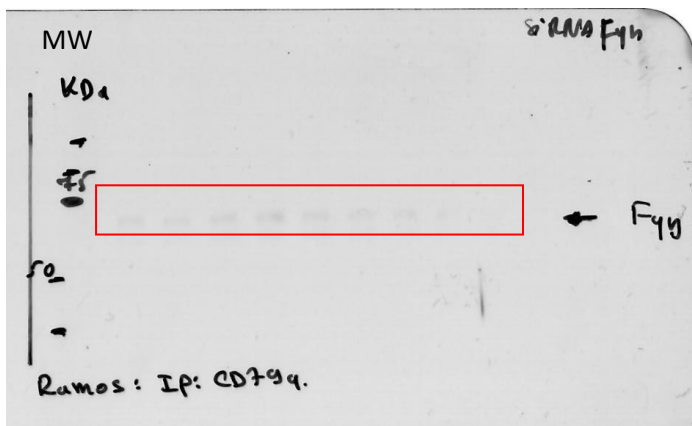

# Figure 2a

IP: CD79a, IB: Lyn (Lyn siRNA)

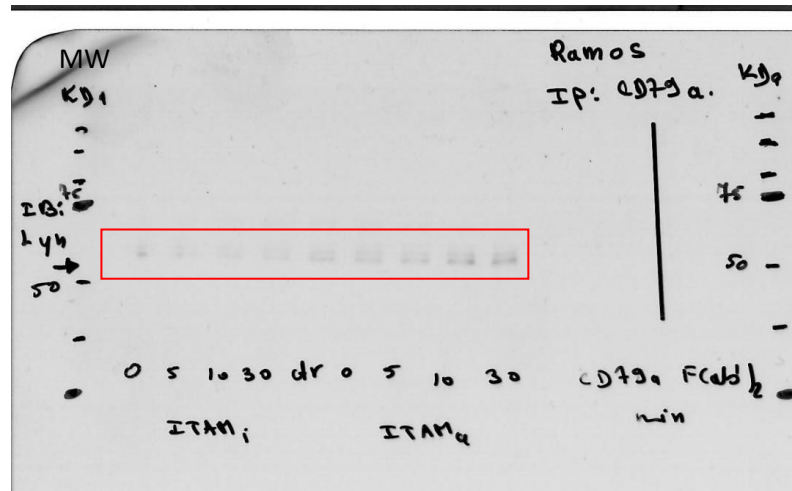



Figure 2a

IP: CD79a, IB: SHP-1 (Lyn siRNA)

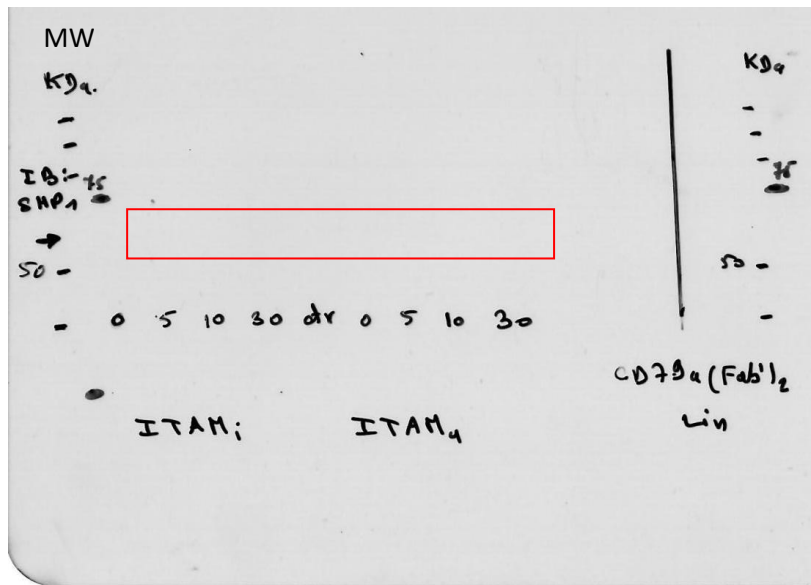

Figure 2a

IP: CD79a, IB: Lyn (Control siRNA)

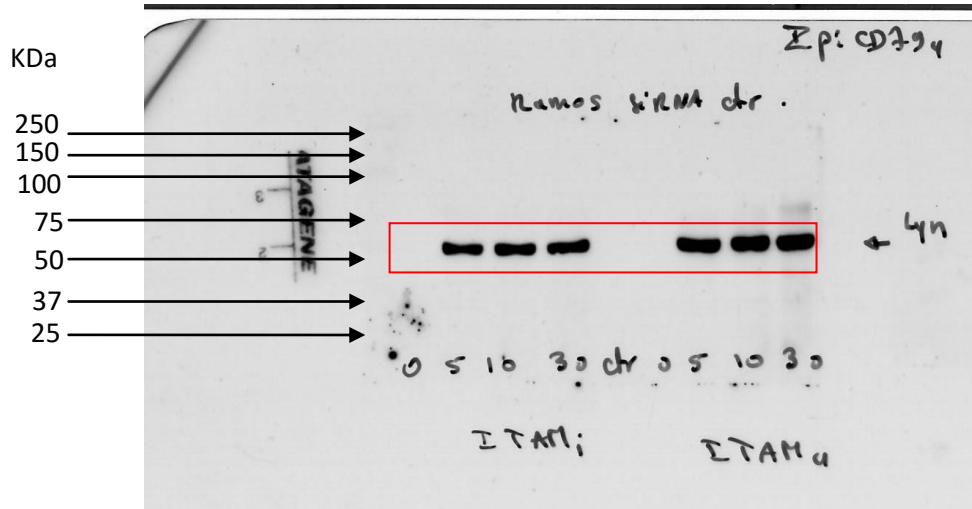

Figure 2a

IP: CD79a, IB: SHP-1 (Fyn siRNA)

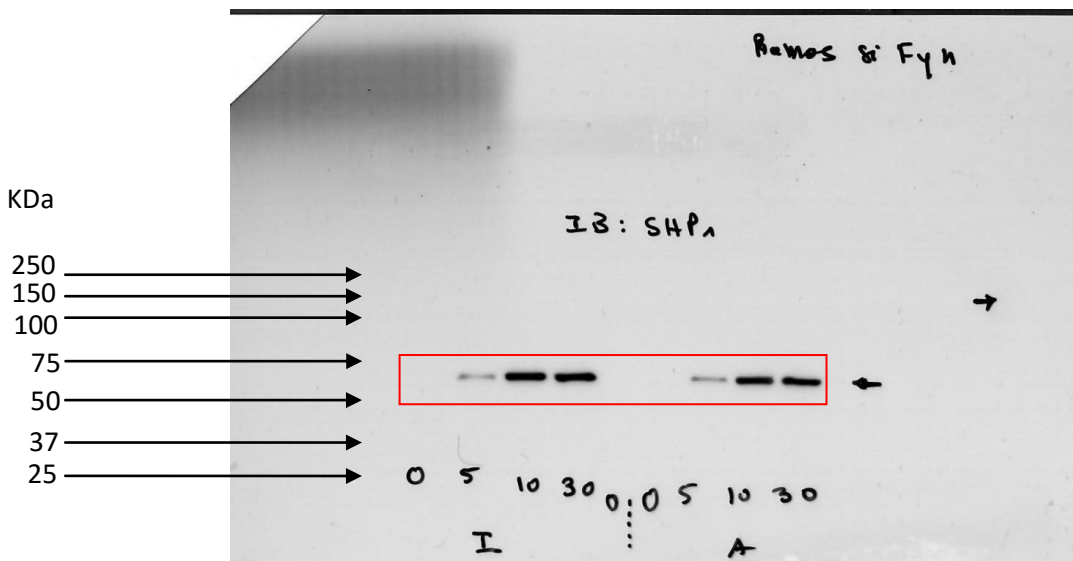

# Figure 2a

IP: CD79a, IB: Syk (Fyn siRNA)

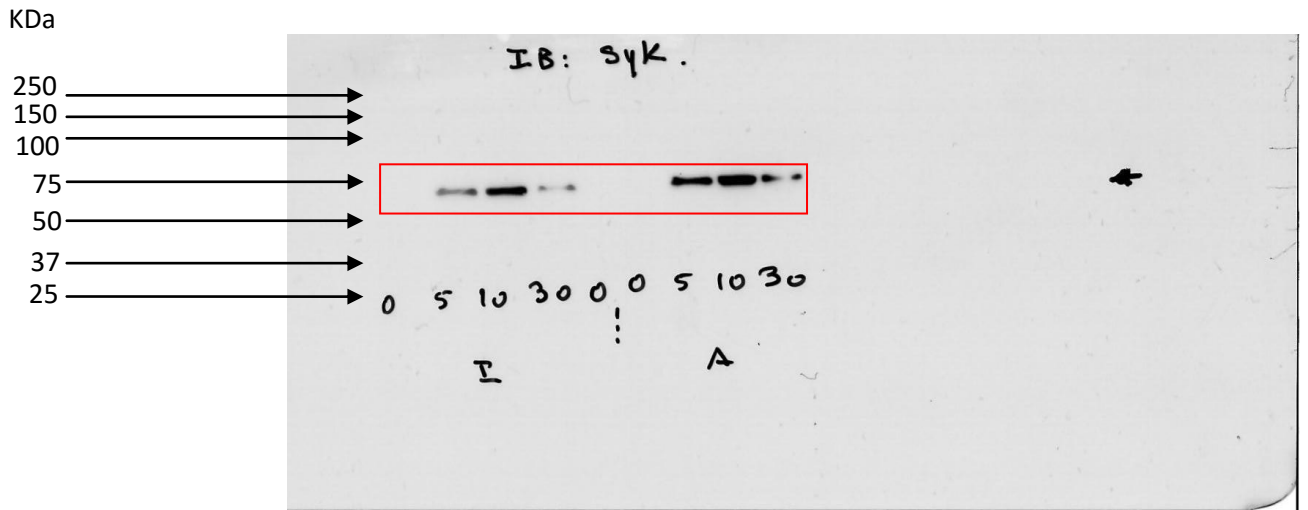

# Figure 2a

IP: CD79a, IB: Syk (Lyn siRNA)

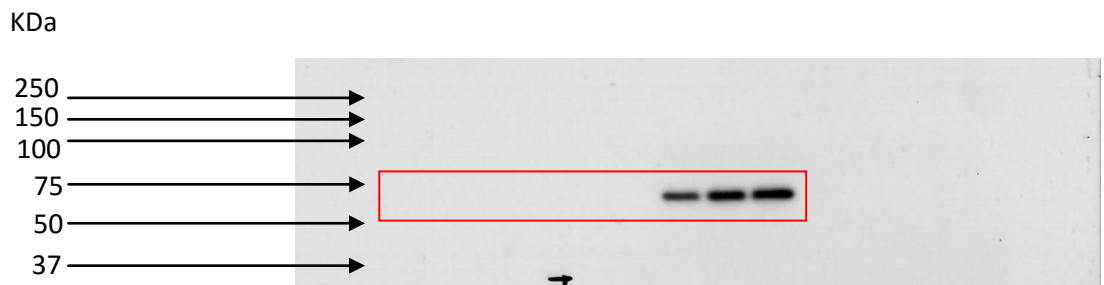

# Figure 2a

IP: CD79a, IB: Fyn (Lyn siRNA)

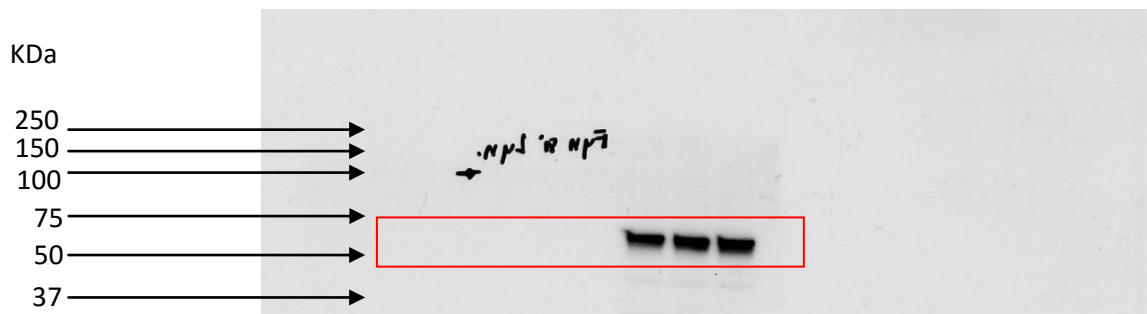

# Figure 2a

IB: Syk, Control siRNA

KDa

250  
150  
100  
75  
50  
37  
25

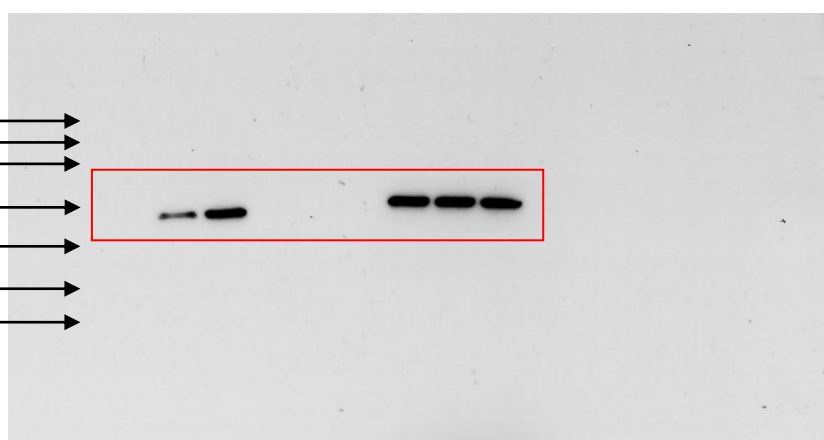

# Figure 2a

IB: SHP-1, Control siRNA

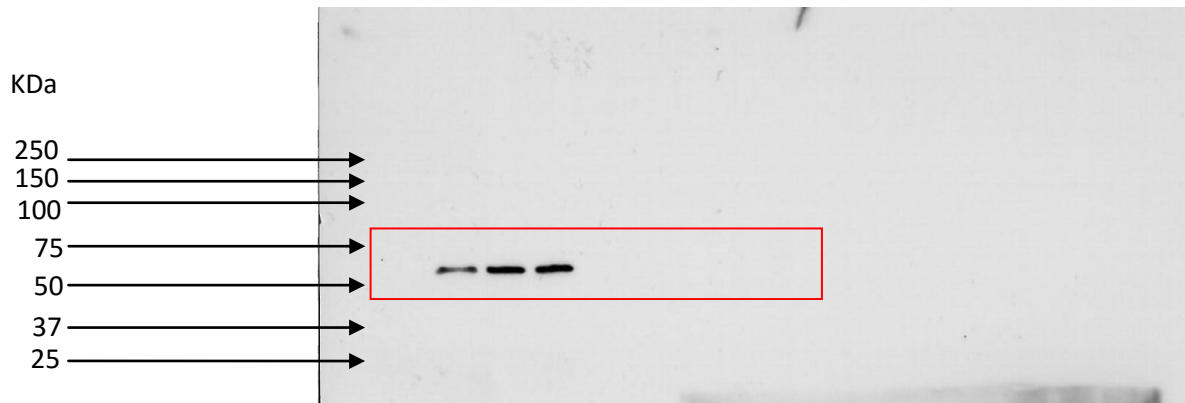



Figure 3b

IB : SHP-1<sup>S591</sup> (Fyn<sup>-/-</sup> FcγRIIA<sup>Tg</sup>, ITAMi)

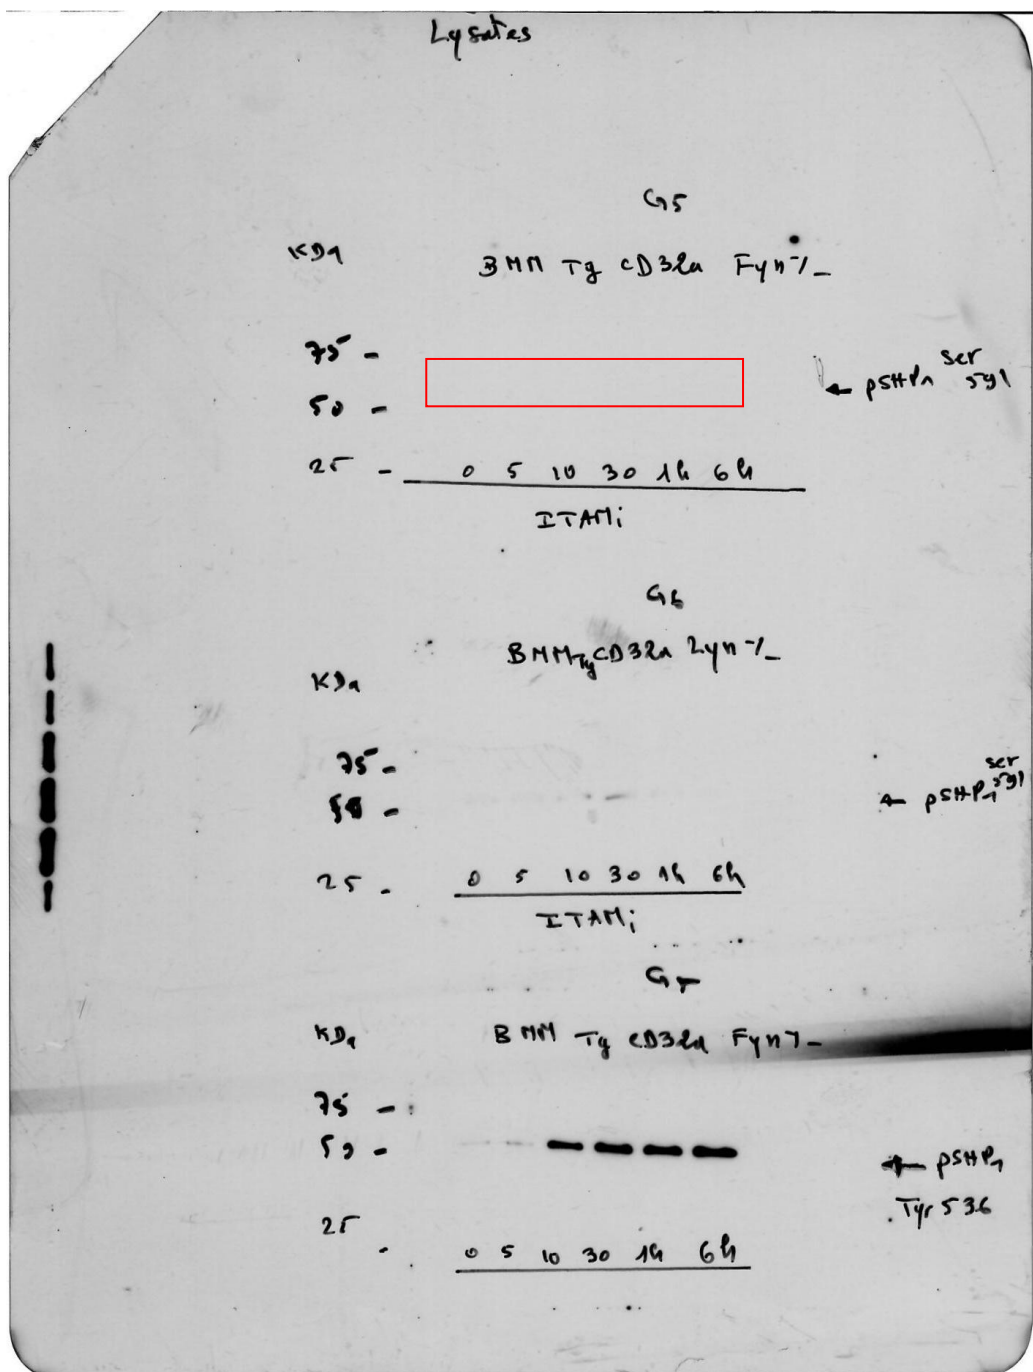

Figure 3b

IB : SHP-1<sup>S591</sup> (Lyn<sup>-/-</sup> FcγRIIA<sup>Tg</sup>, ITAMi)

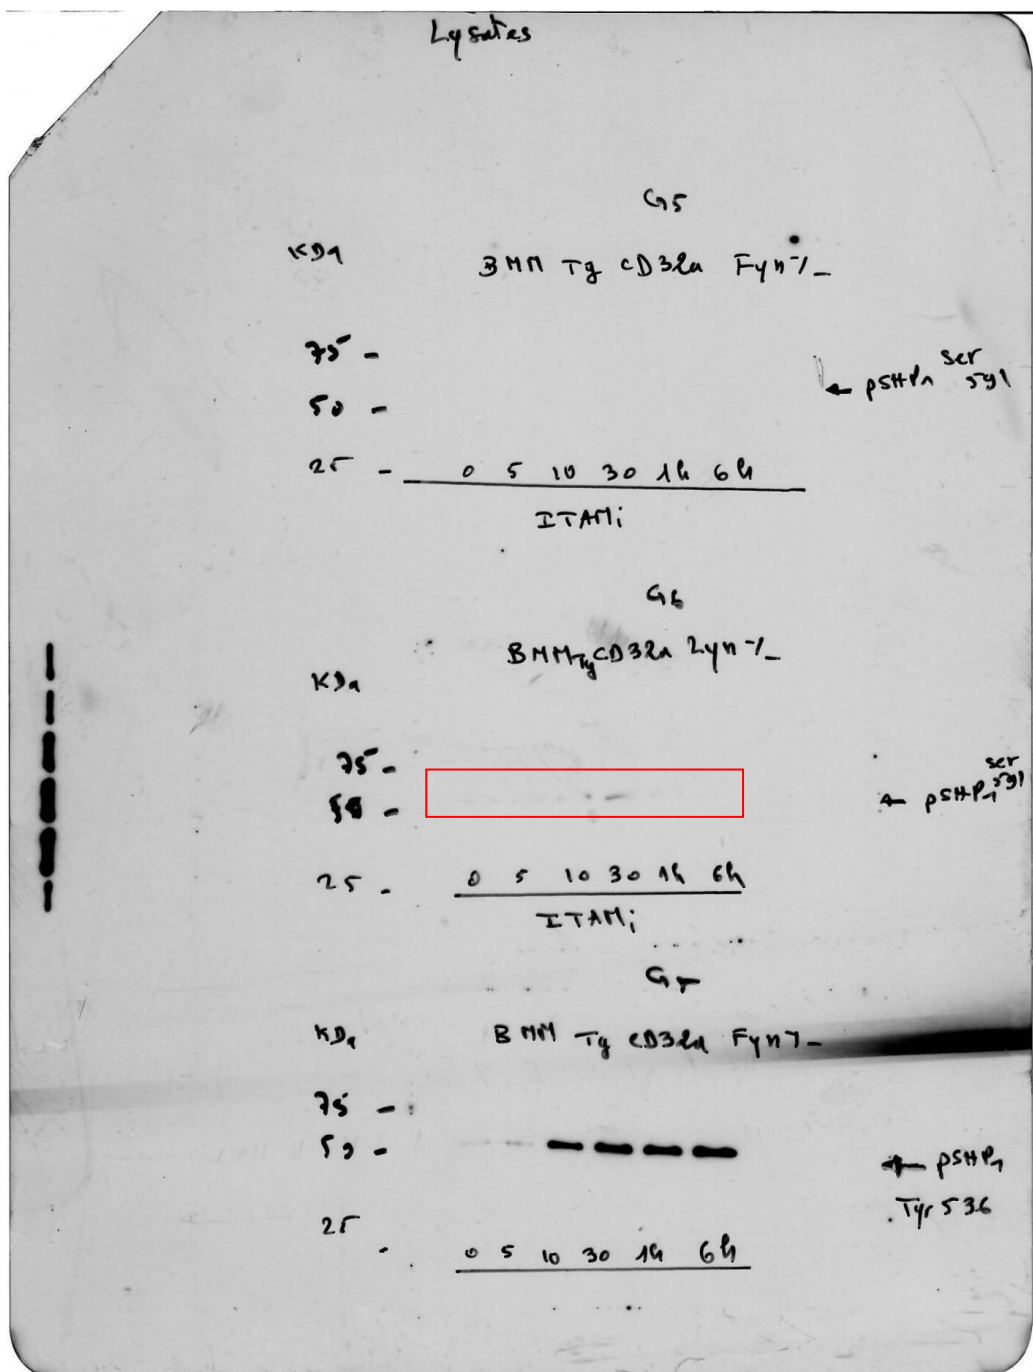

Figure 3b

IB : SHP-1<sup>Y536</sup> (Fyn<sup>-/-</sup> FcγRIIA<sup>Tg</sup>, ITAM)

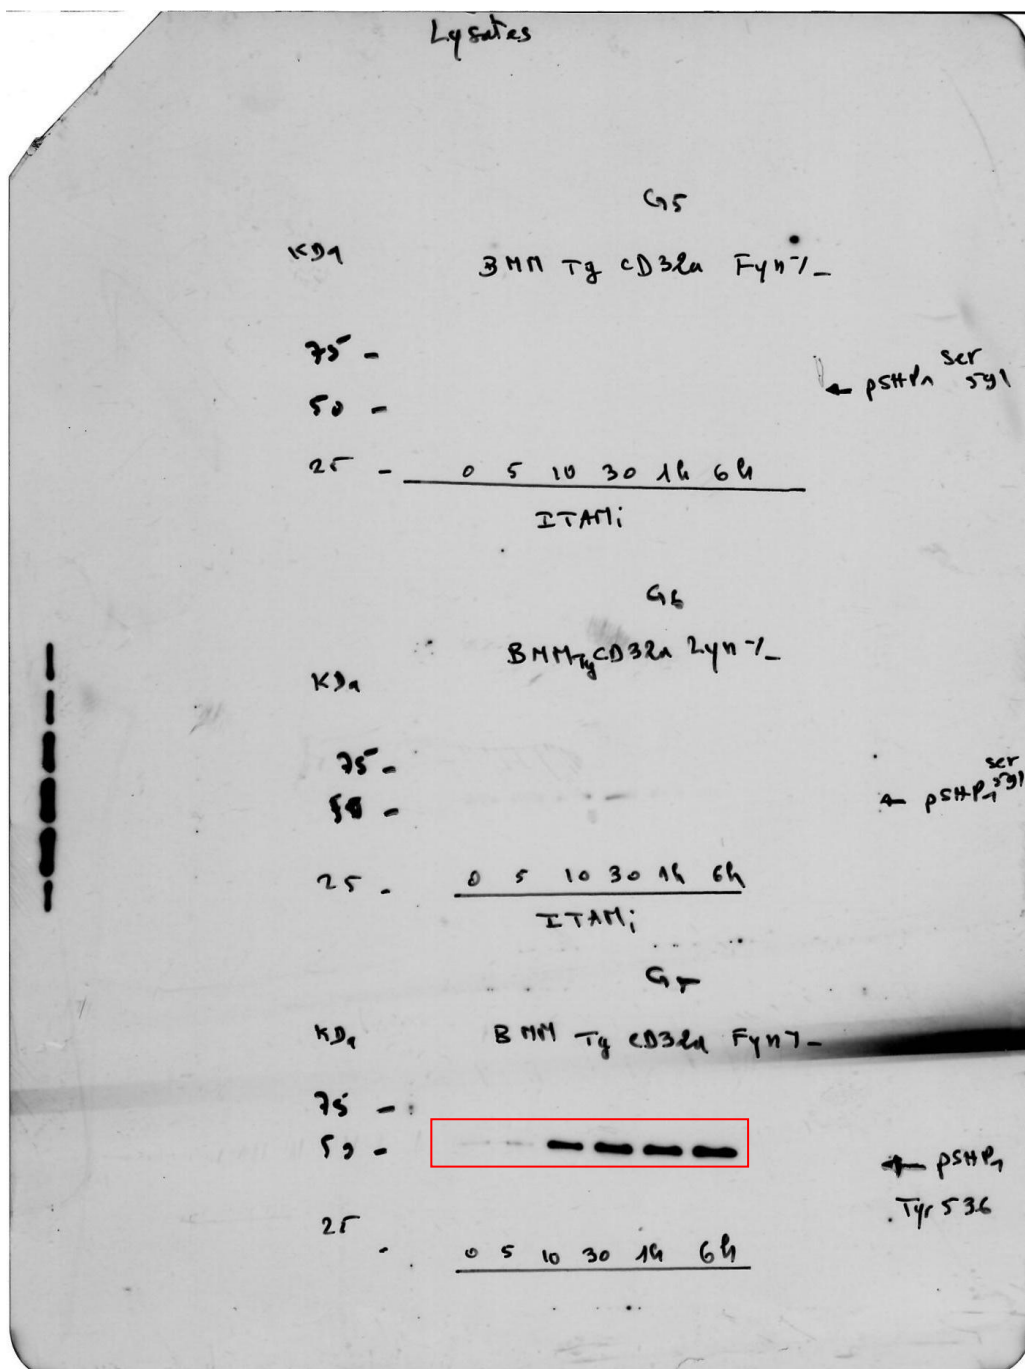

Figure 3b

IB : SHP-1<sup>S591</sup> (FcγRIIA<sup>Tg</sup>, ITAMi)

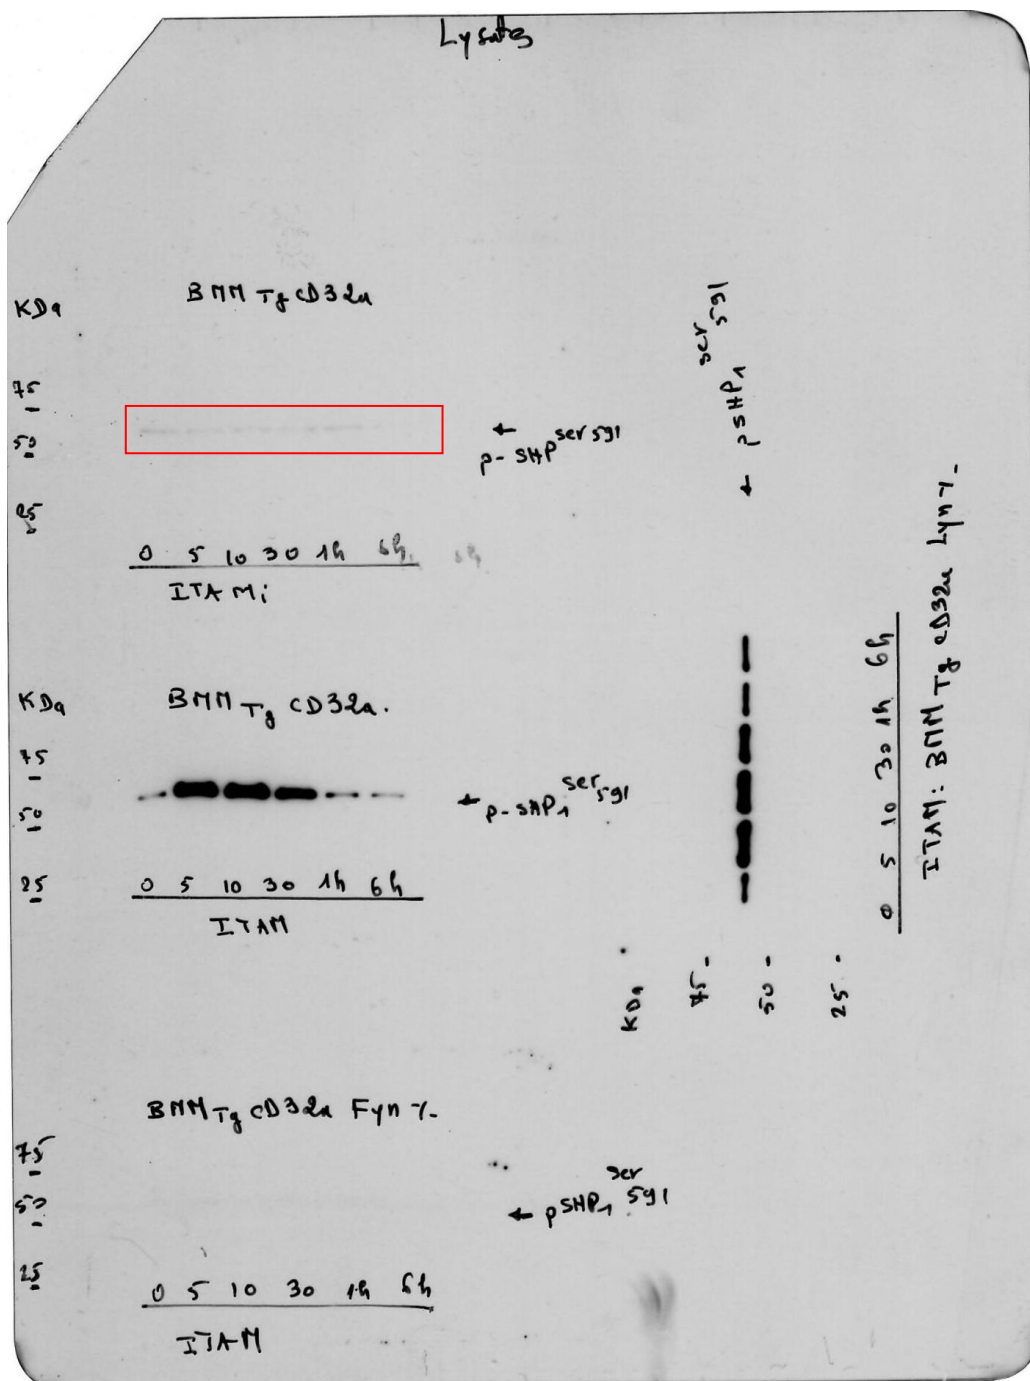

Figure 3b

IB : SHP-1<sup>Y591</sup> (FcγRIIA<sup>Tg</sup>, ITAM)

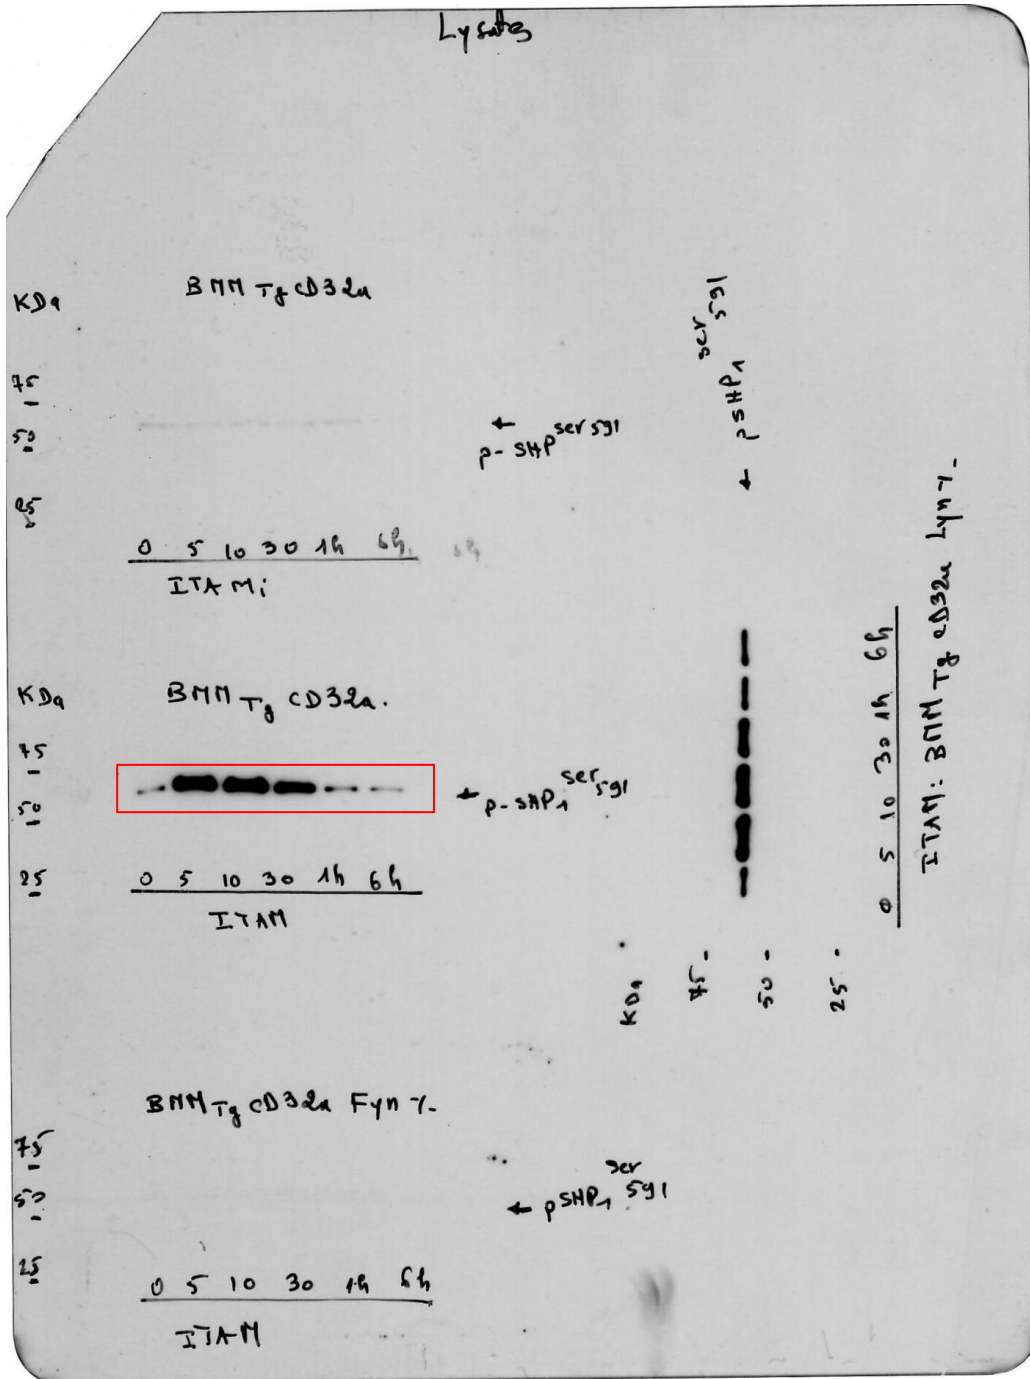



Figure 3b

IB : SHP-1<sup>Y536</sup> (Fyn<sup>-/-</sup> FcγRIIA<sup>Tg</sup>, ITAM)

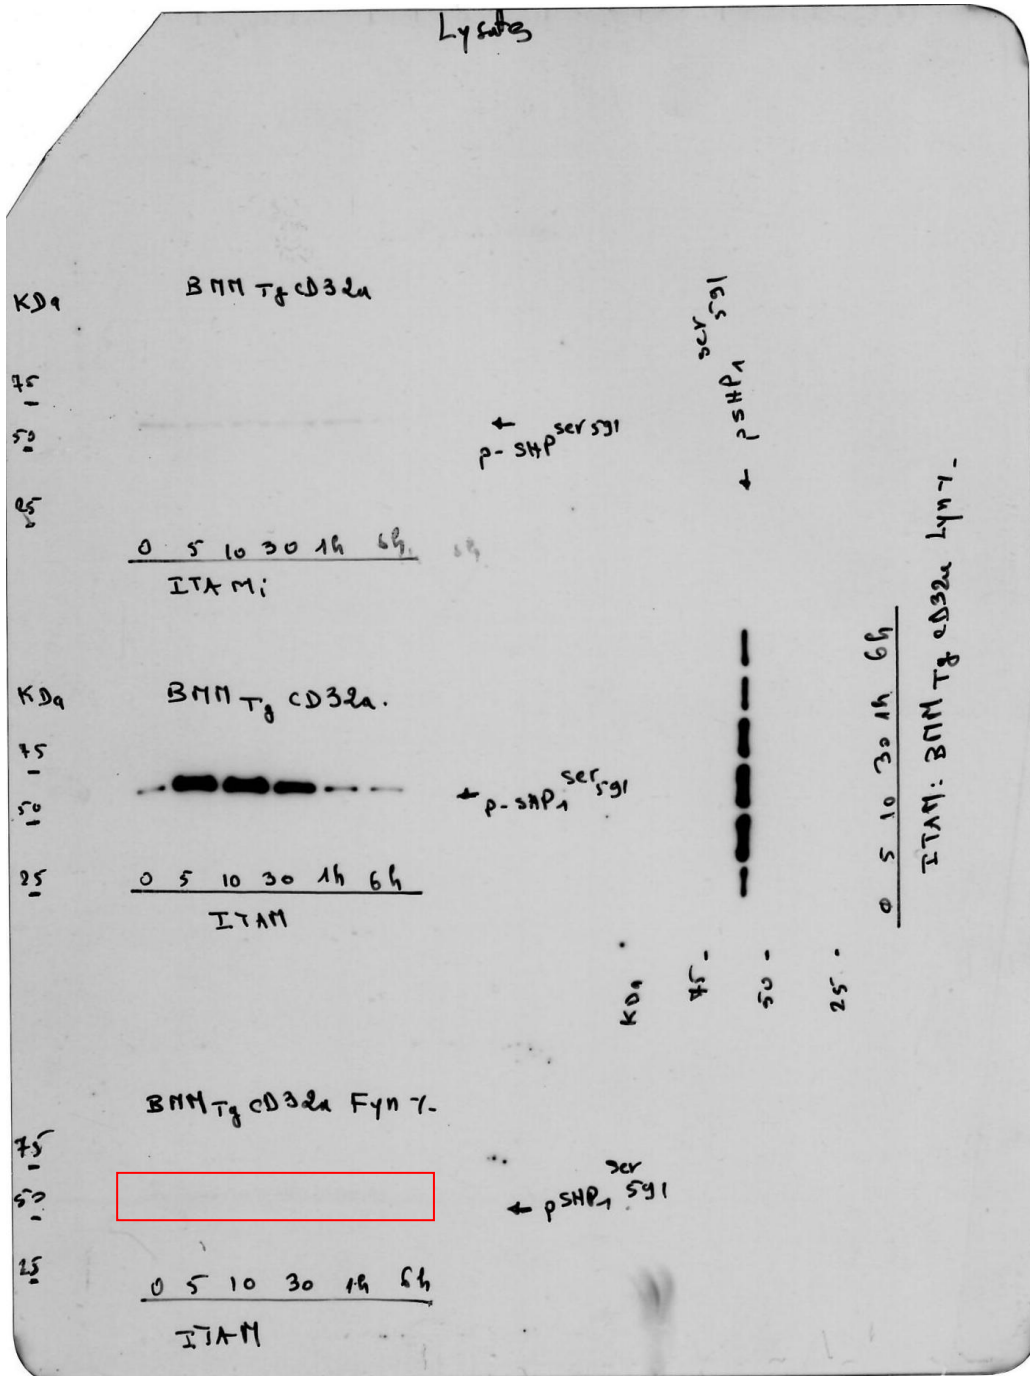

Figure 3b

IB : SHP-1<sup>S591</sup> (Lyn<sup>-/-</sup>FcγRIIA<sup>Tg</sup>, ITAM)

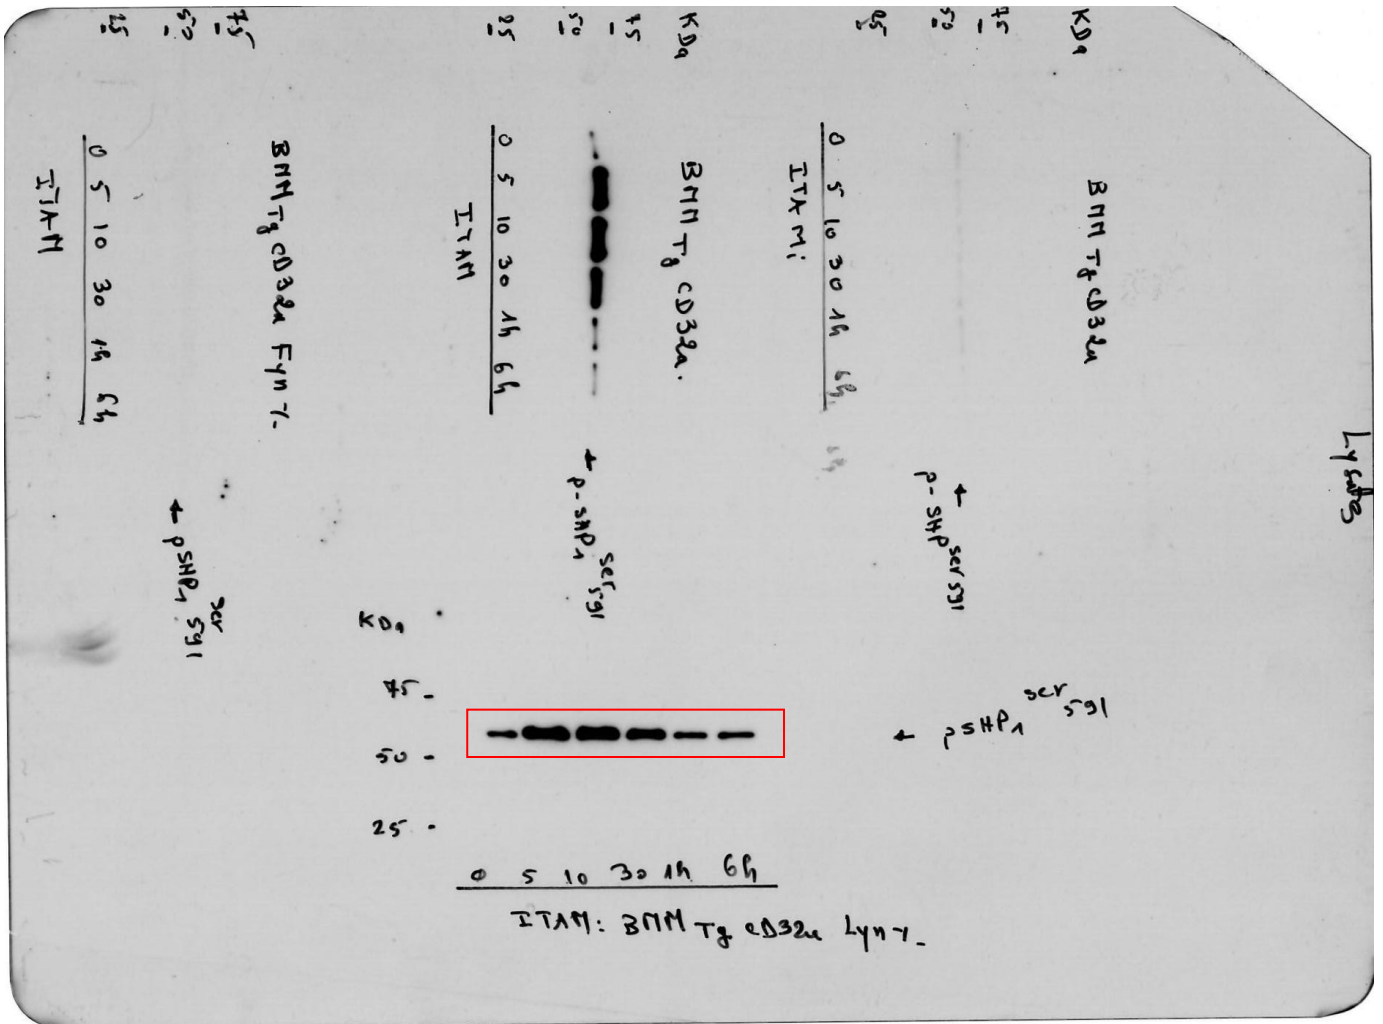

Figure 3b

IB : SHP-1(FcγRIIA<sup>Tg</sup>, ITAMi)

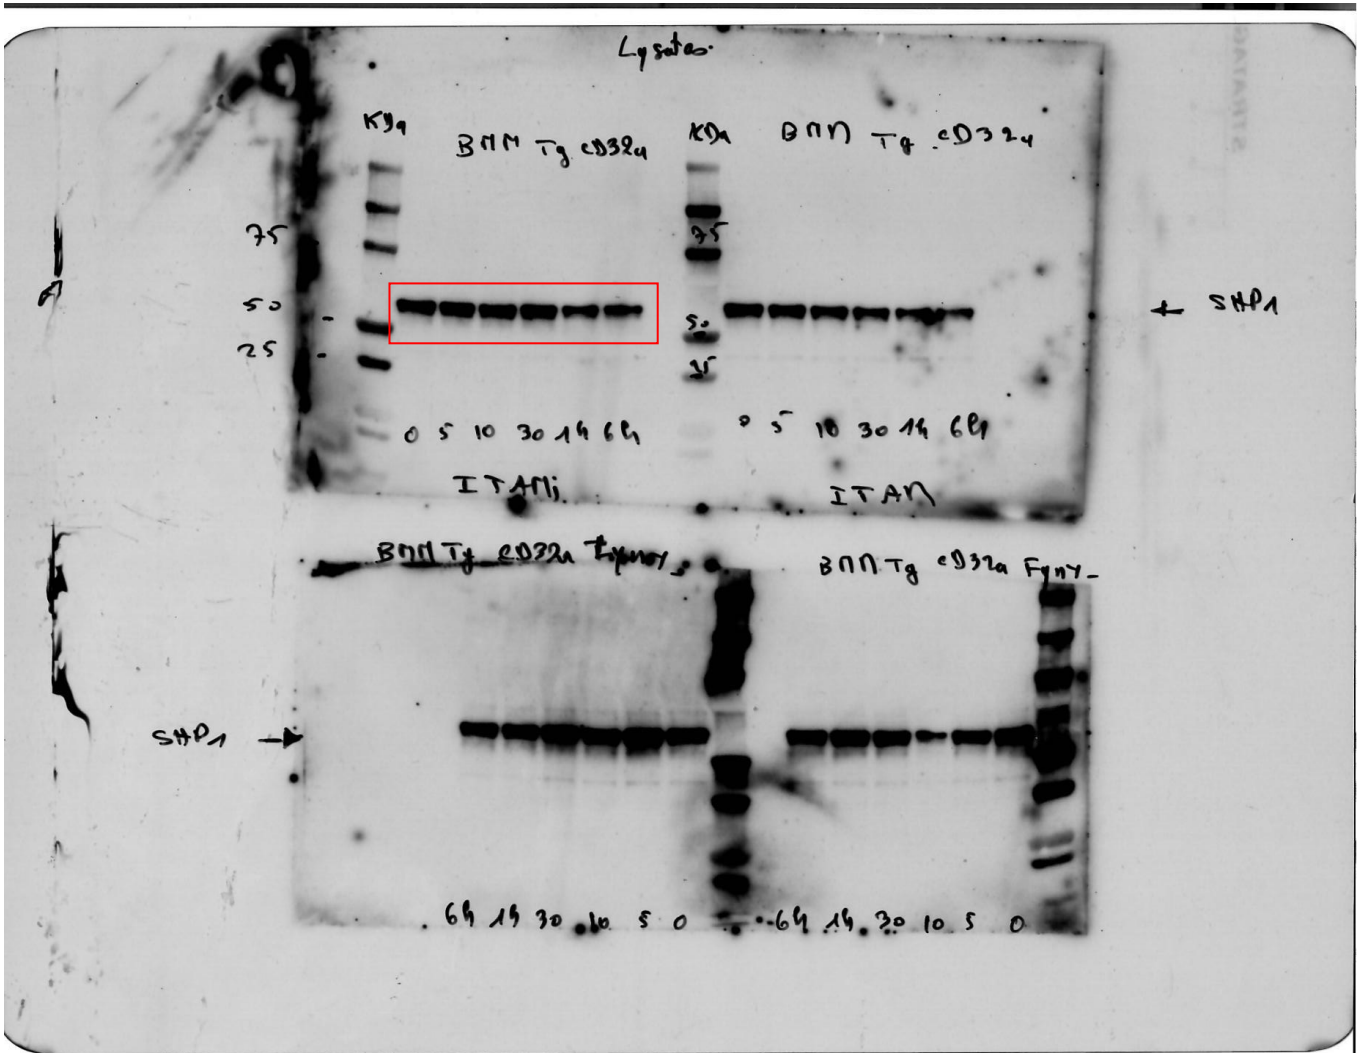



Figure 3b

IB : SHP-1(Fc $\gamma$ RIIA<sup>Tg</sup>, ITAM)

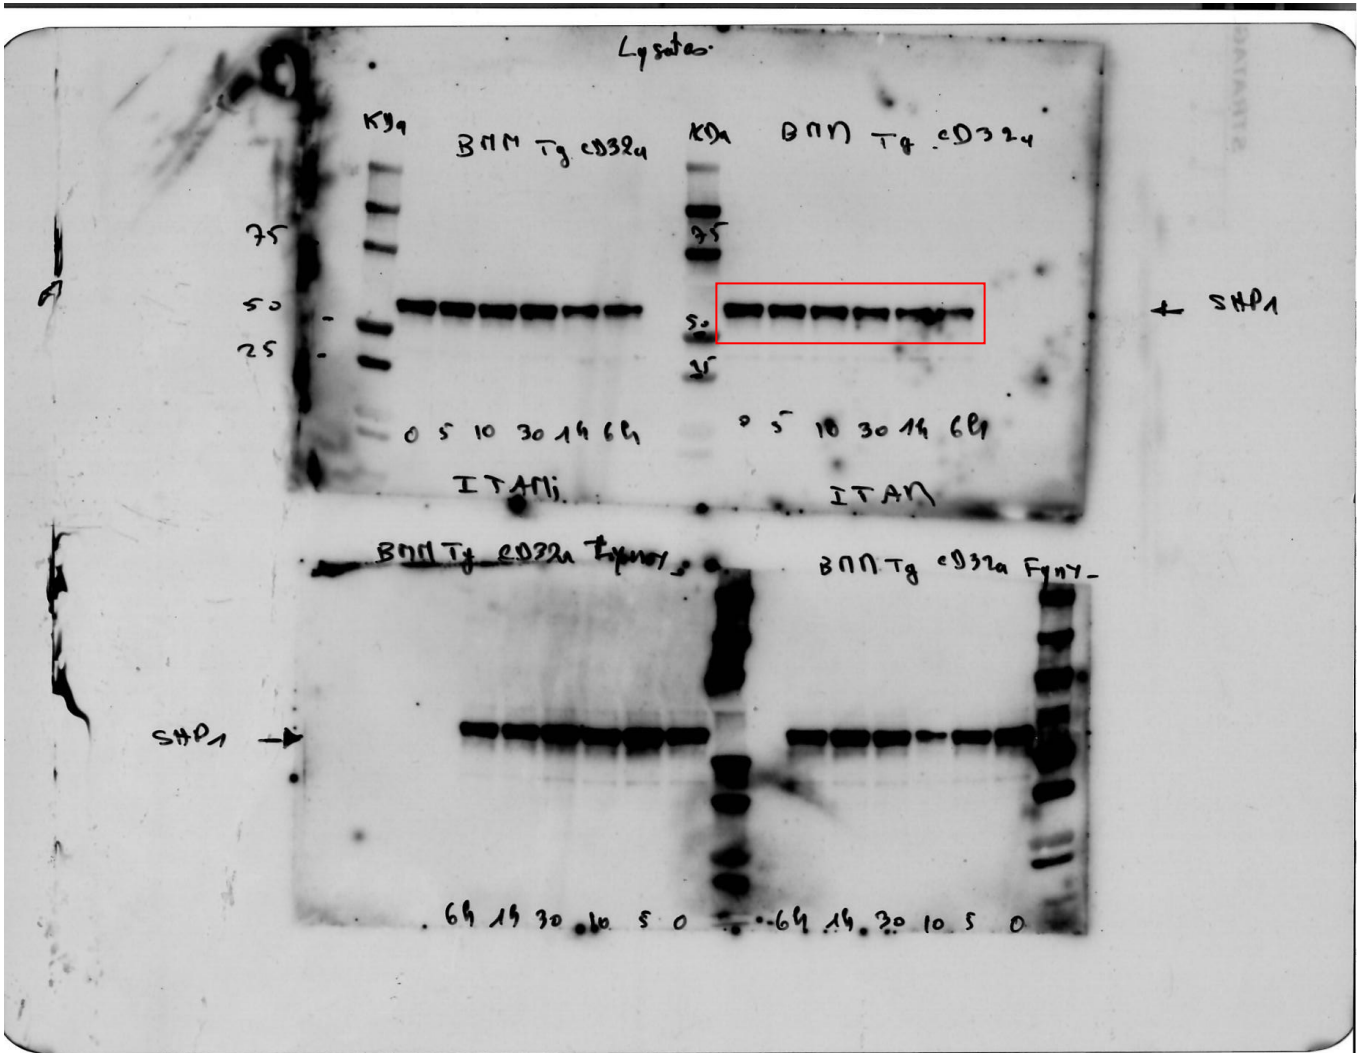

Figure 3b

IB : SHP-1<sup>Y536</sup> (FcγRIIA<sup>Tg</sup>, ITAMi)

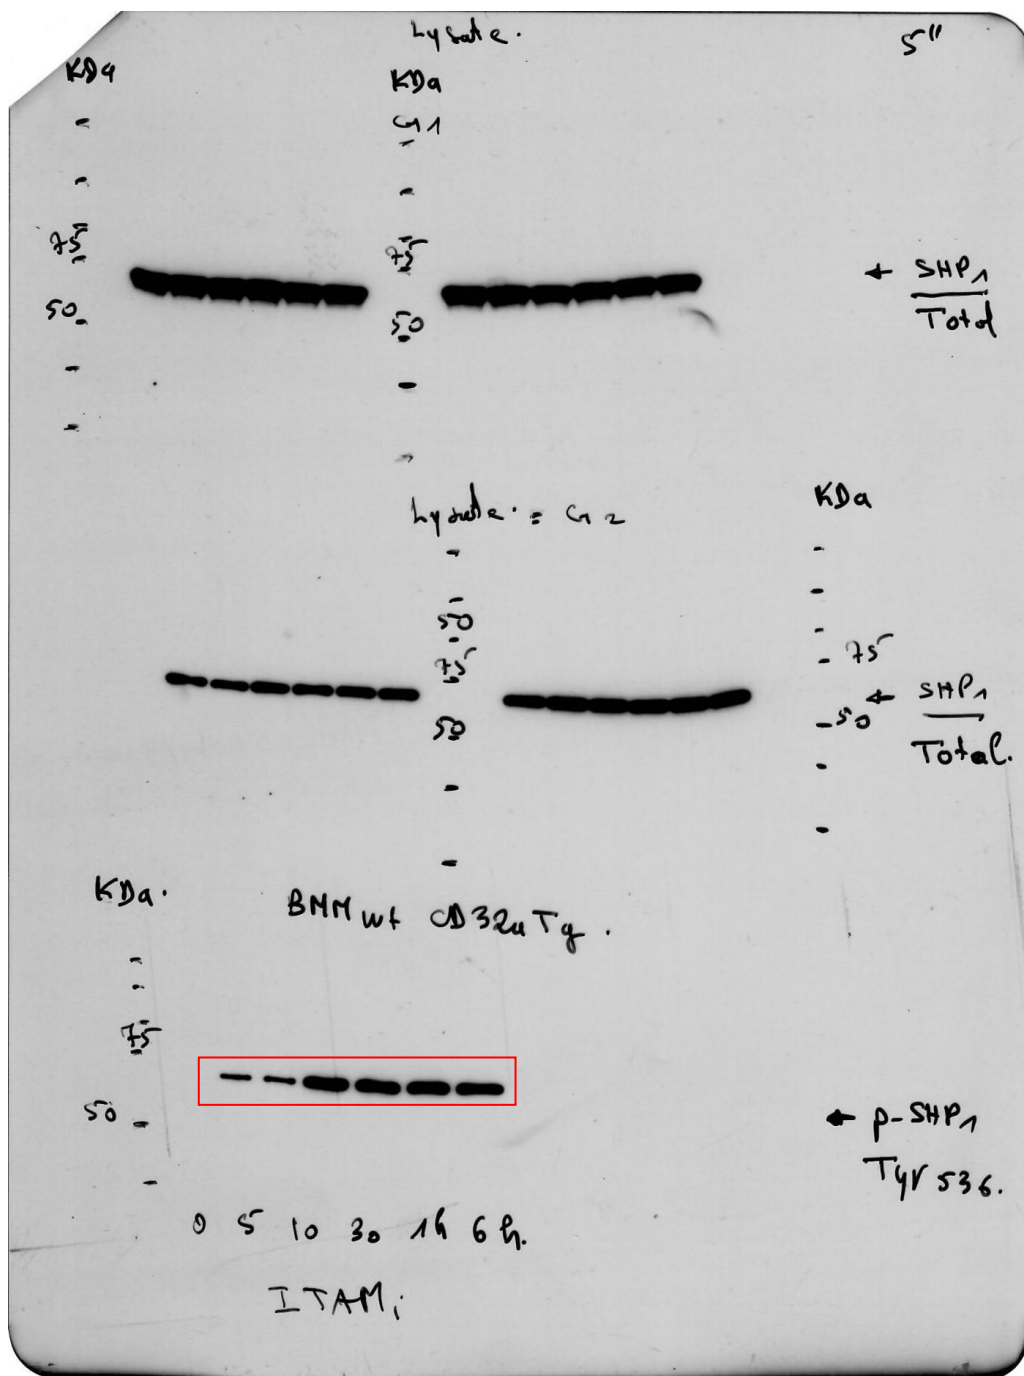

Figure 3b

IB : SHP-1 ( $Fyn^{-/-}$  Fc $\gamma$ RIIA<sup>Tg</sup>, ITAM)

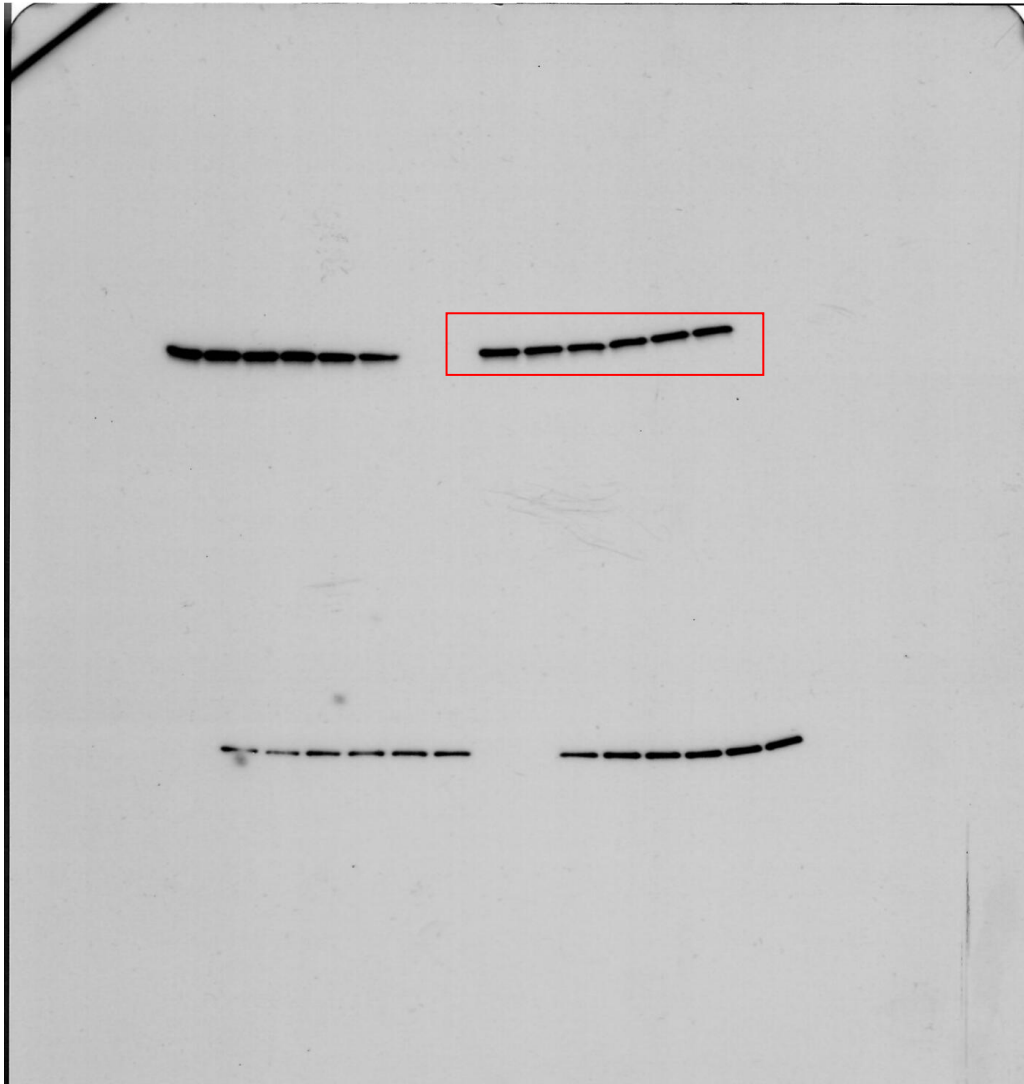

Figure 3b

IB : SHP-1 ( $Fyn^{-/-}Fc\gamma RIIA^{Tg}$ , ITAMi)

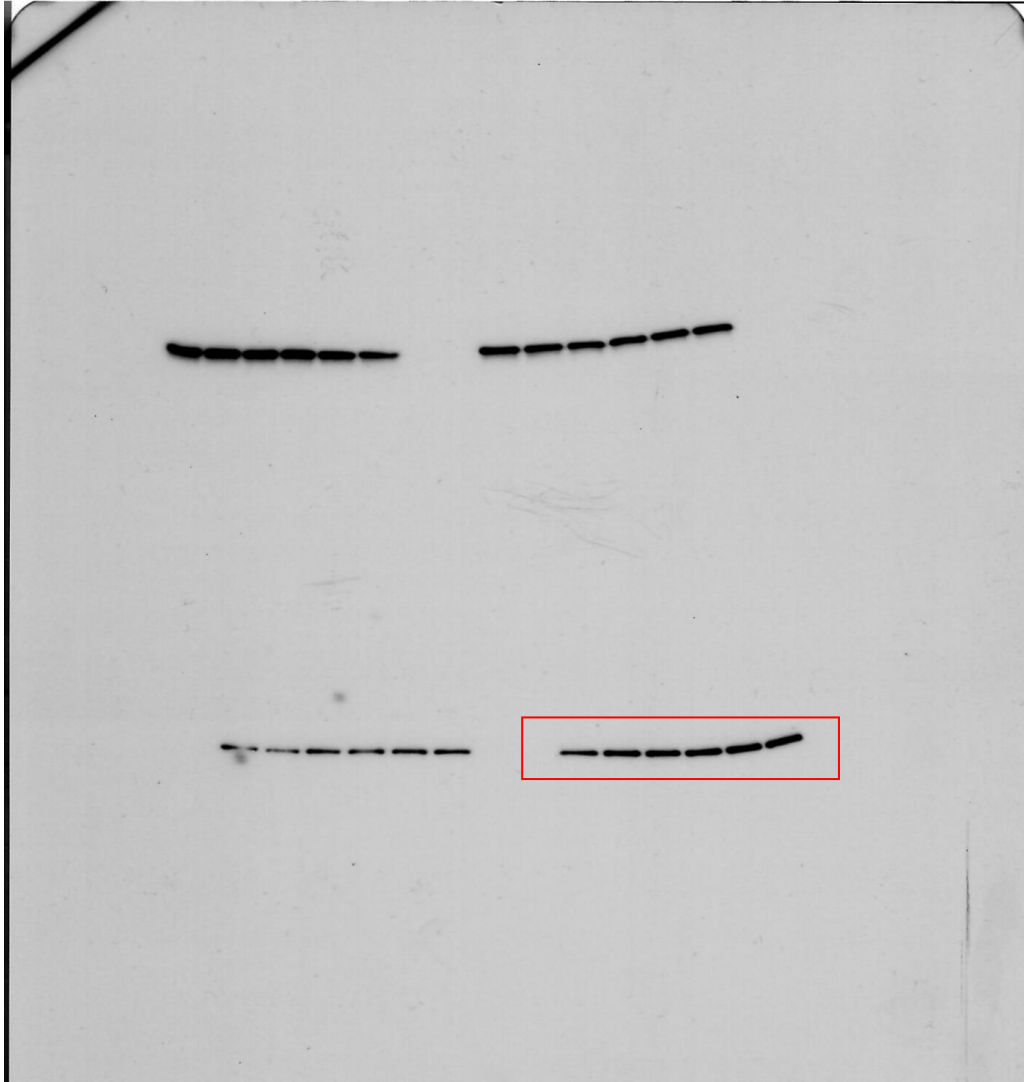

Figure 3b

IB : SHP-1<sup>Y536</sup> (Lyn<sup>-/-</sup> FcγRIIA<sup>Tg</sup>, ITAM)

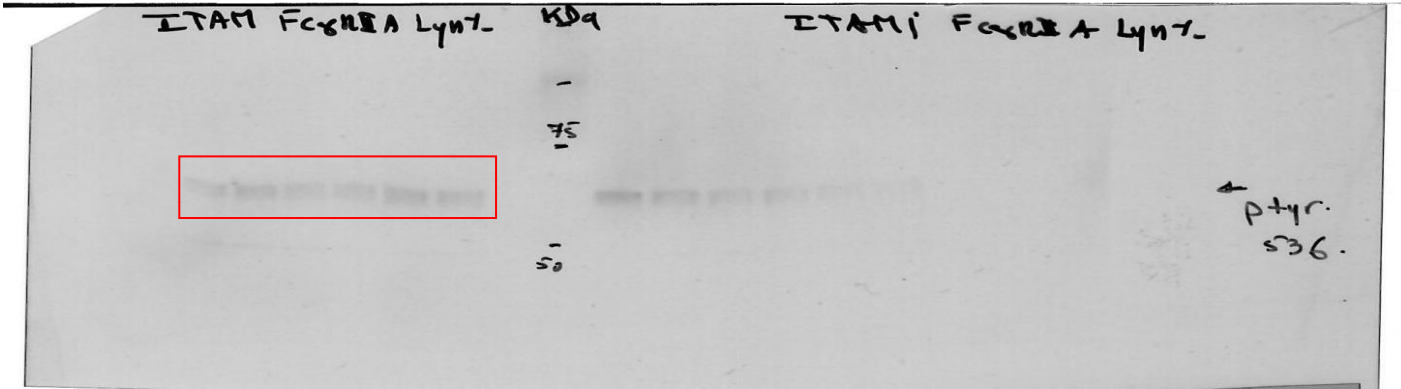

Figure 3b

IB : SHP-1<sup>Y536</sup> (Lyn<sup>-/-</sup>FcγRIIA<sup>Tg</sup>, ITAMi)

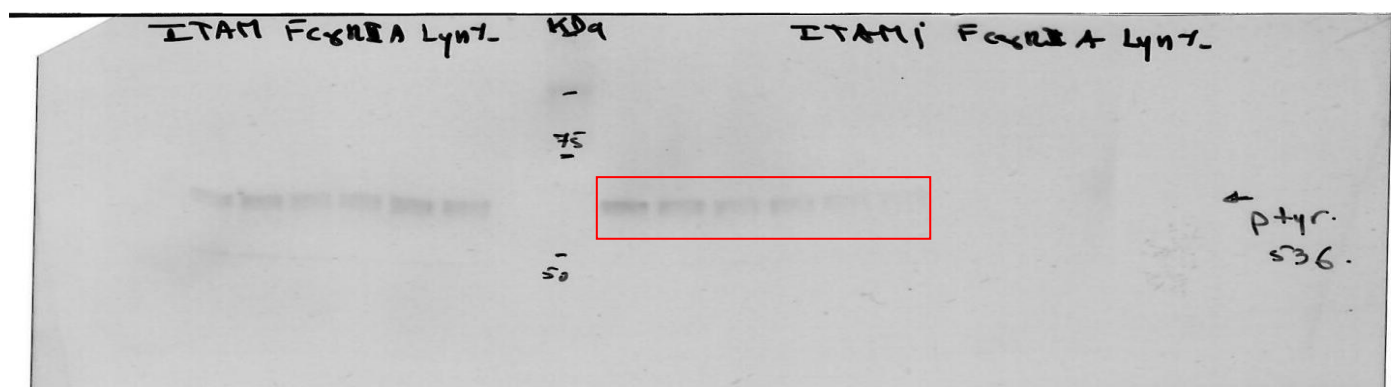

Figure 3b

IB : pSHP-1<sup>Y536</sup> (FcγRIIA<sup>Tg</sup>, ITAMi)

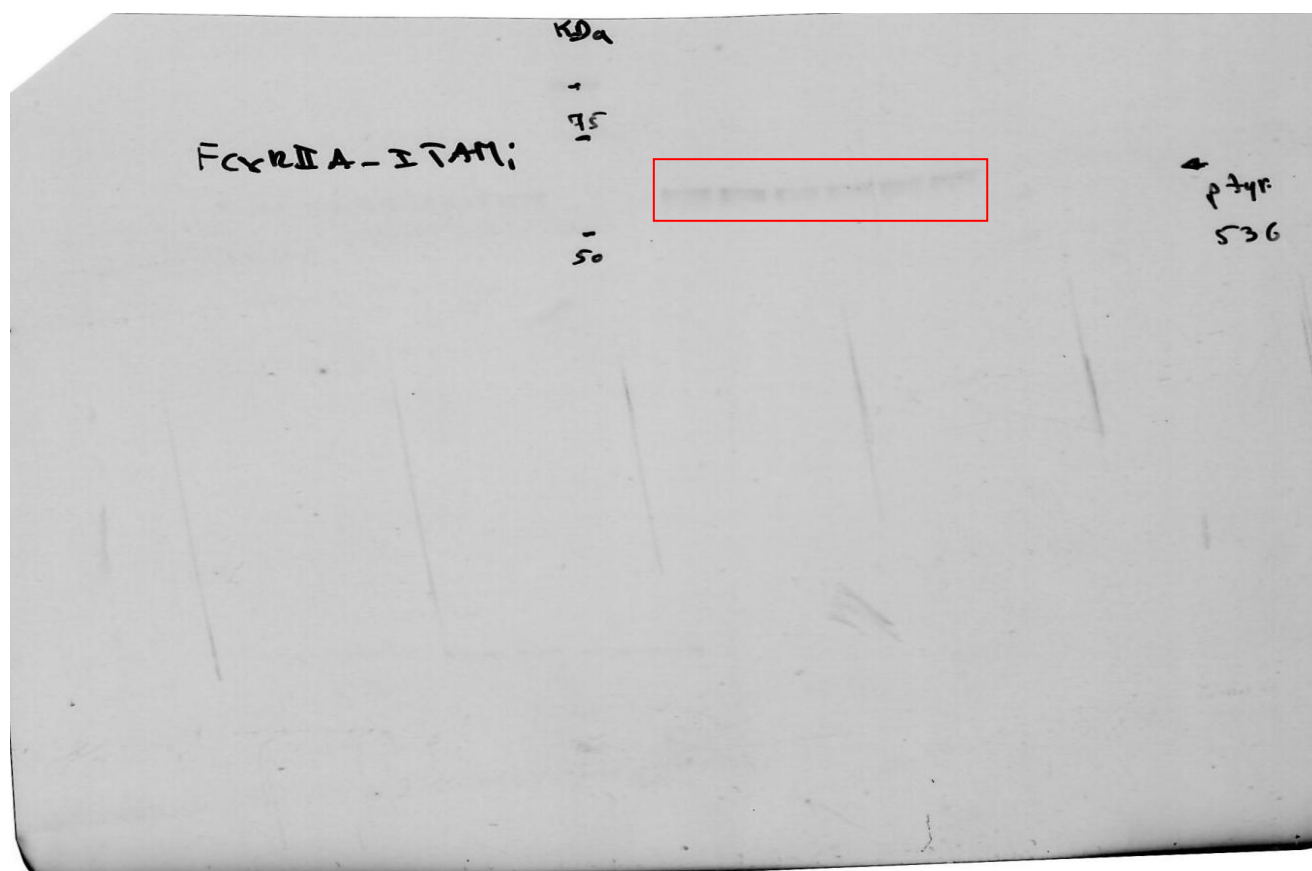

Figure 3C

IB: pSHP<sup>S591</sup> (PI3K inhibitor)

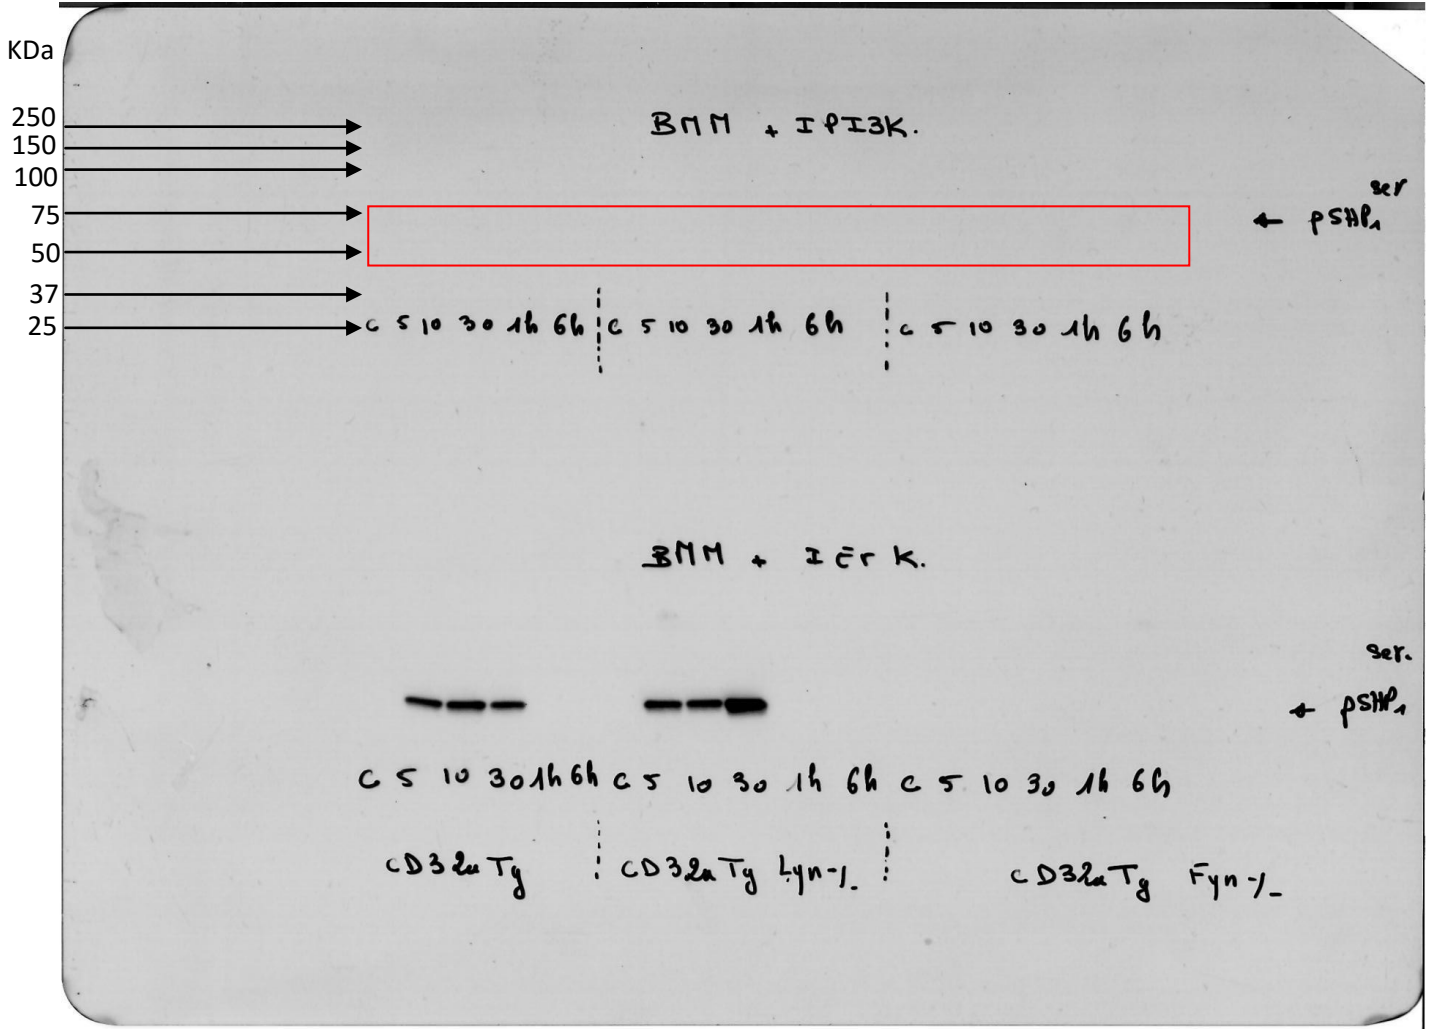



Figure 3C

IB: pSHP<sup>S591</sup> (ERK inhibitor)

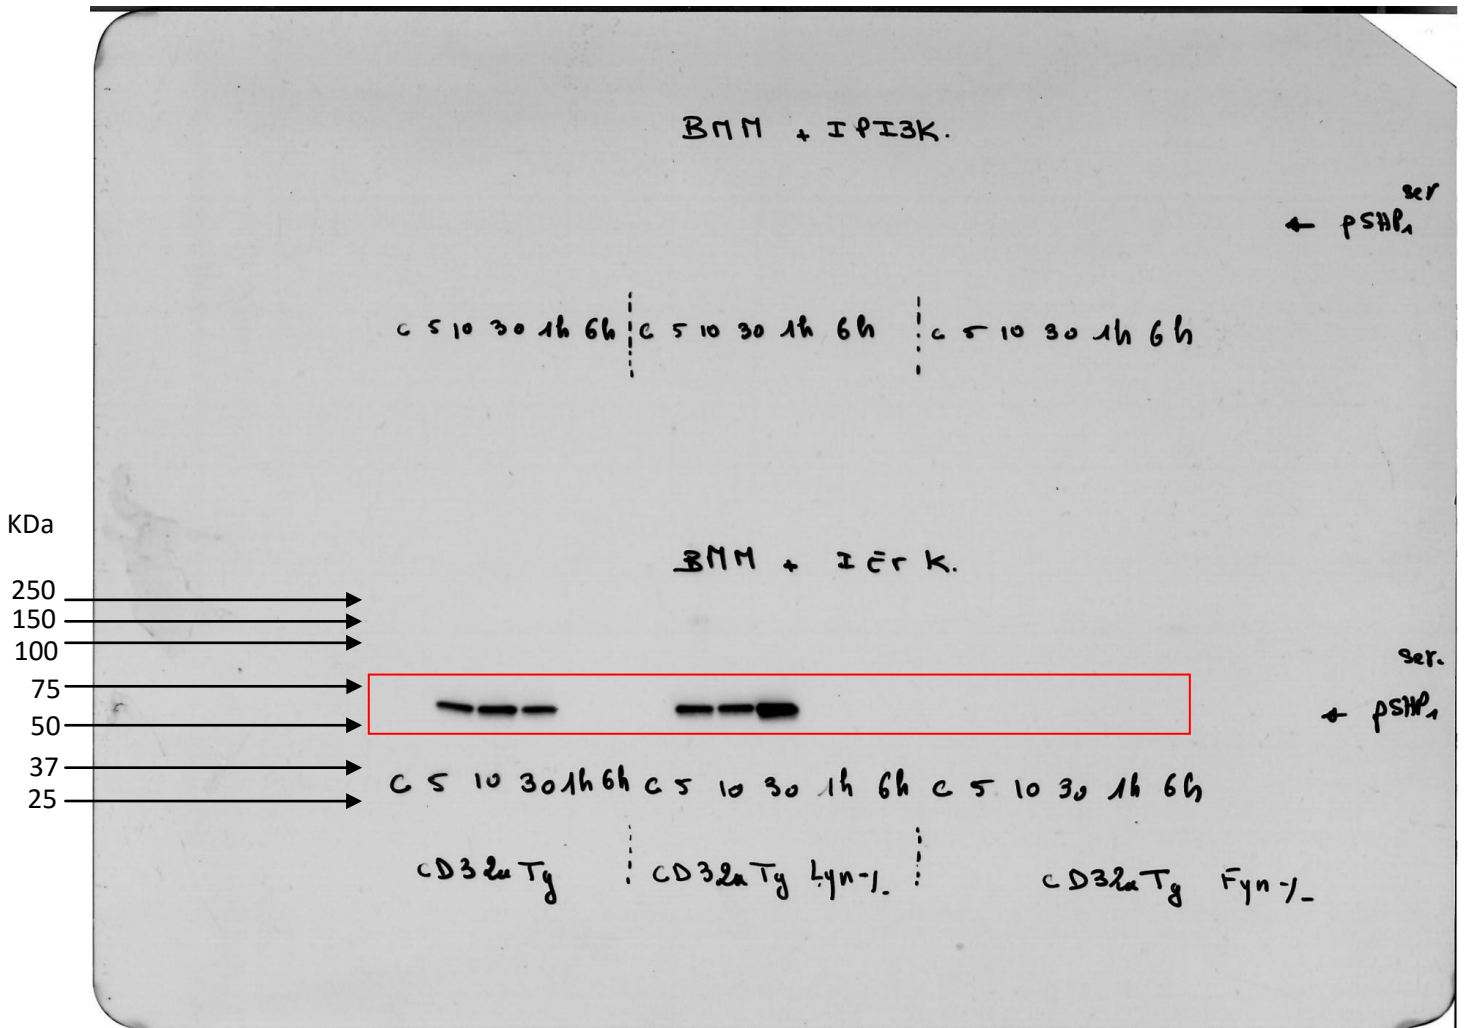

Figure 3c

IB: pAKT (ERK inhibitor)

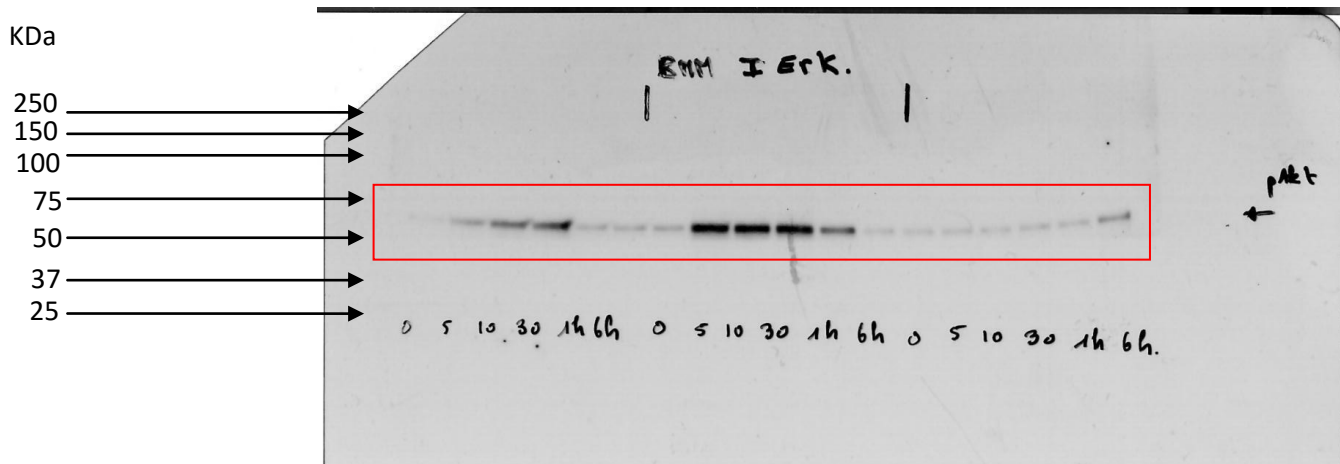

Figure 3c

IB: pAKT (PKC inhibitor)

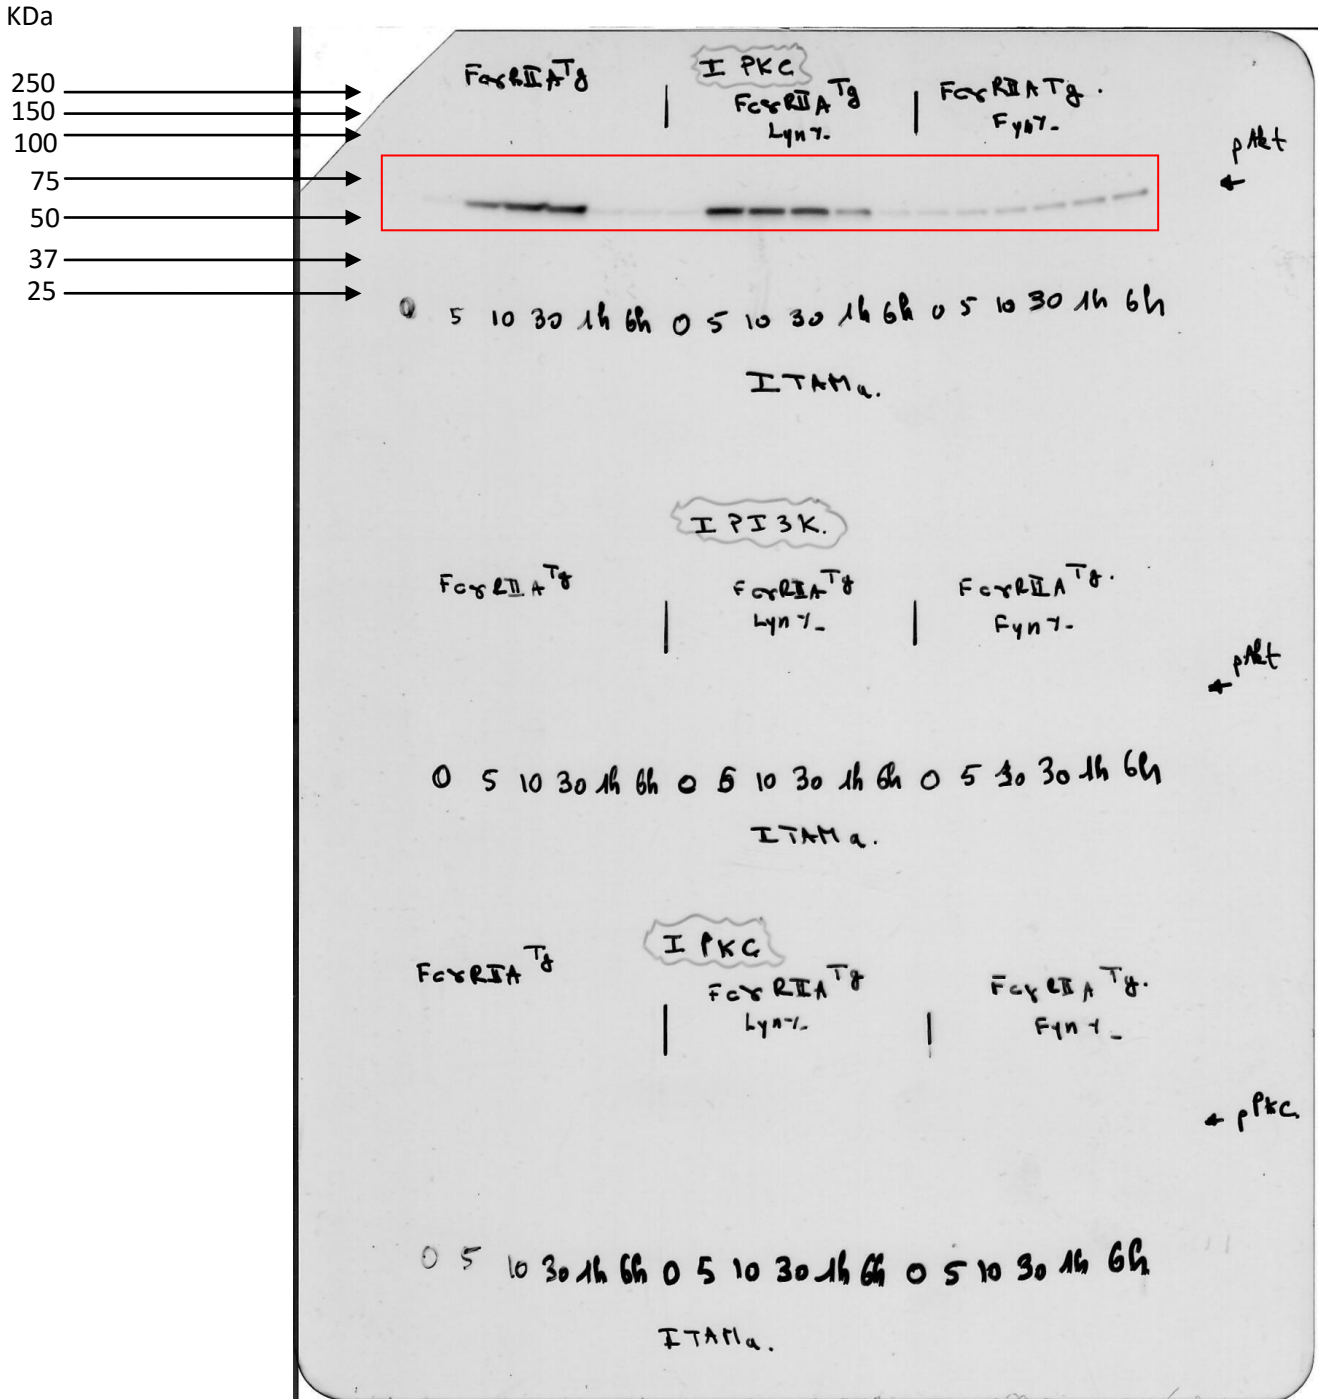

Figure 3c

IB: pAKT (PI3K inhibitor)

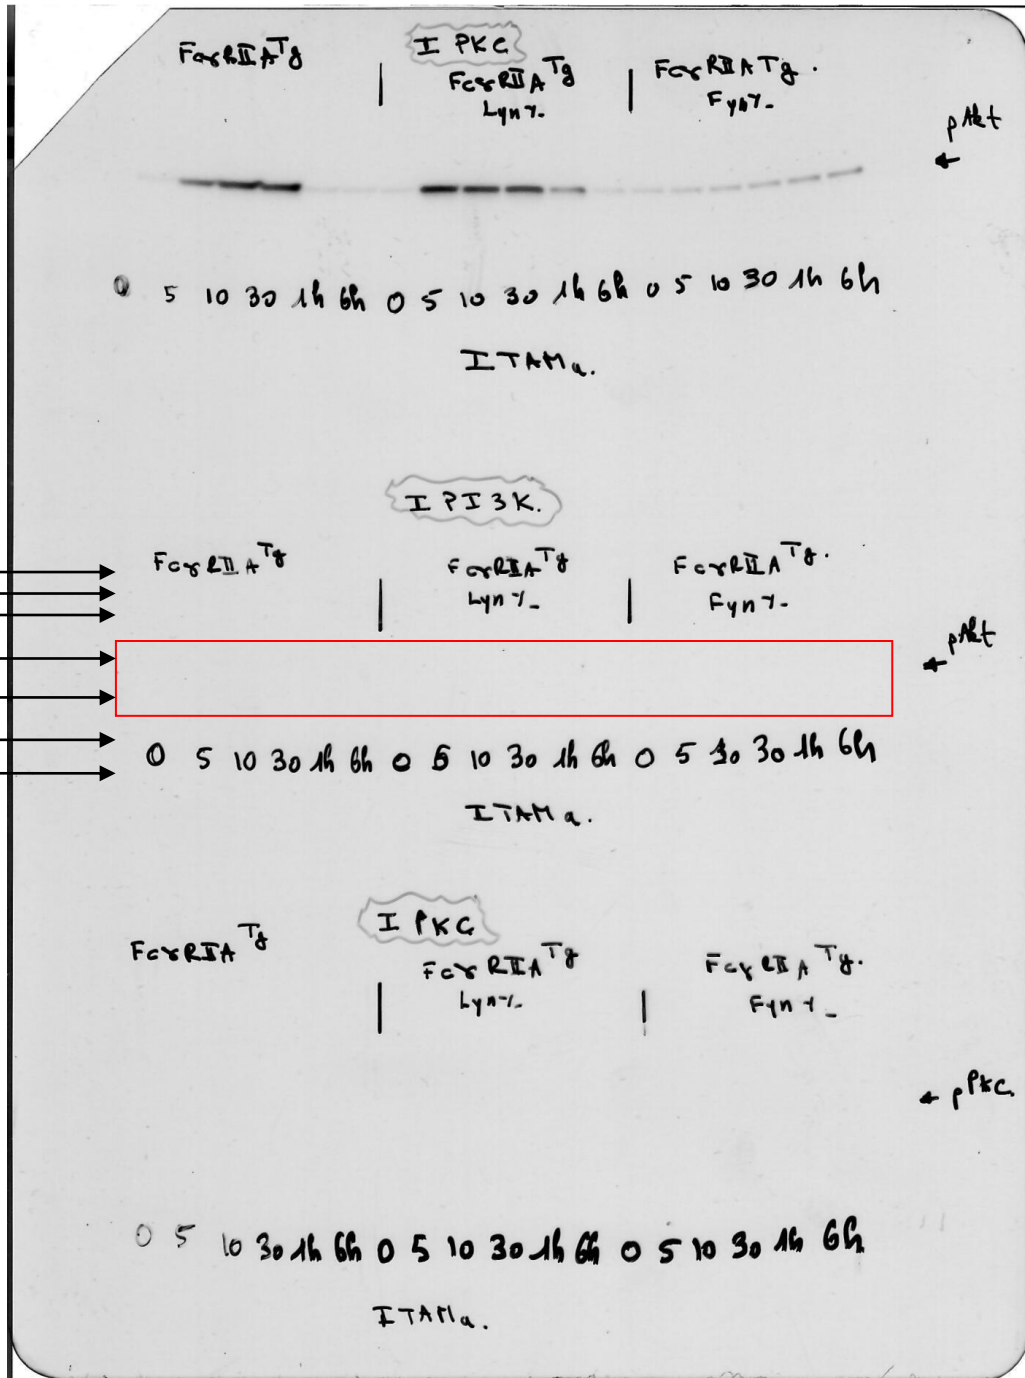

Figure 3c

IB: pPKC (PKC inhibitor)

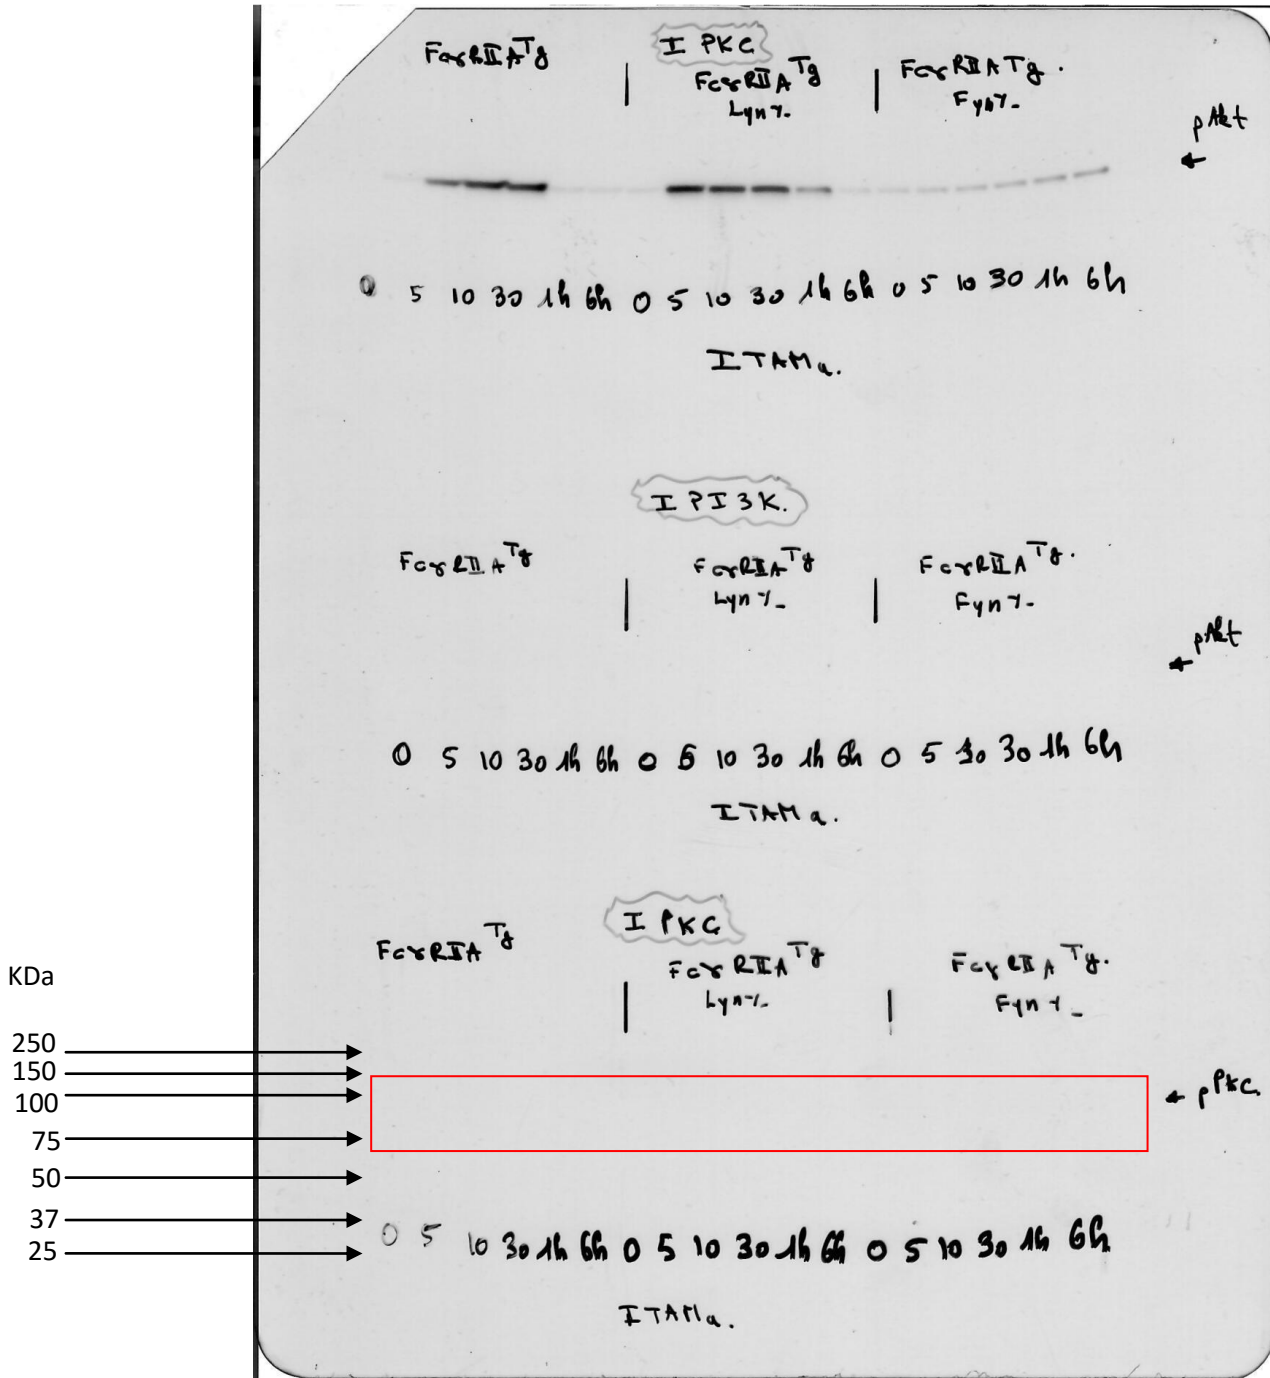

Figure 3c

IB: pERK (PKC inhibitor)

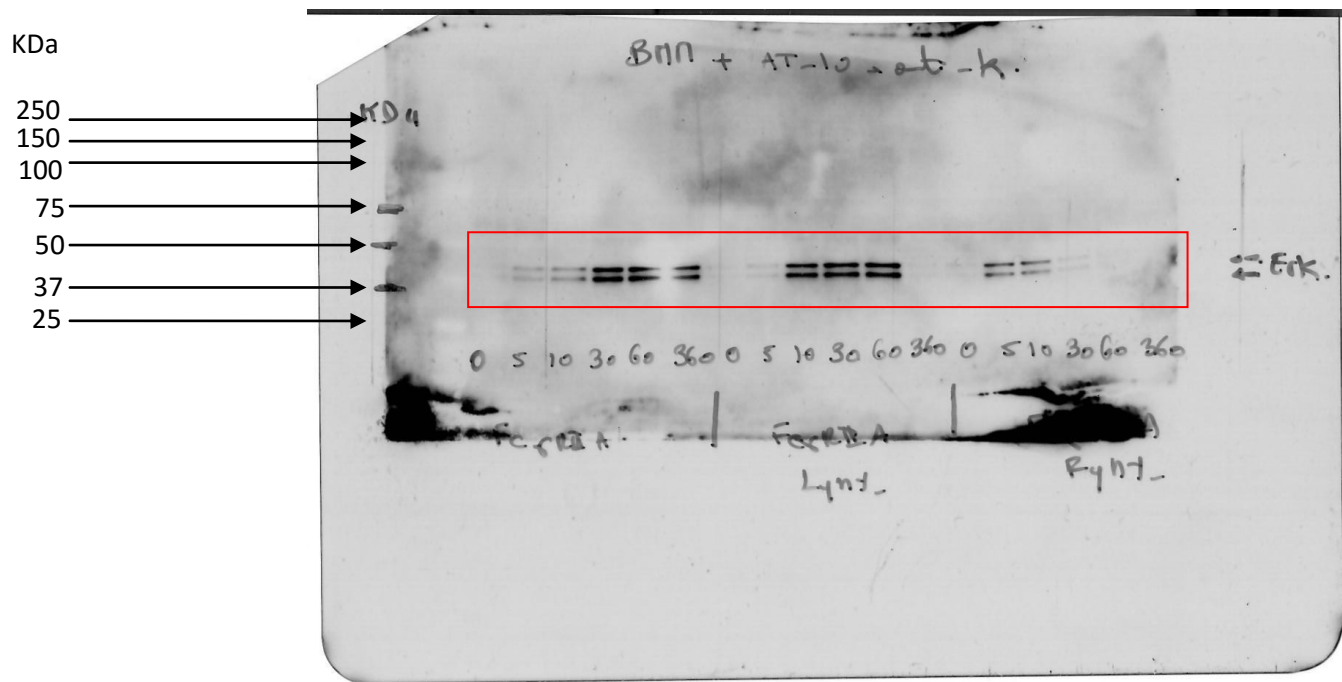

Figure 3c

IB: pSHP-1<sup>S591</sup> (PKC inhibitor)

KDa

250  
150  
100  
75  
50  
37  
25

BMM + IPKC.

c 5 10 30 1h 6h | c 5 10 30 1h 6h | c 5 10 30 1h 6h  
CD32aTy | CD32aTy Lyn-/- | CD32aTy Fyn-/-

BMM.

q

p-PKC →

c 5 10 30 1h 6h | c 5 10 30 1h 6h | c 5 10 30 1h 6h  
CD32aTy | CD32aTy Lyn-/- | CD32aTy Fyn-/-



Figure 3c  
IB: pPKC (Vehicle)

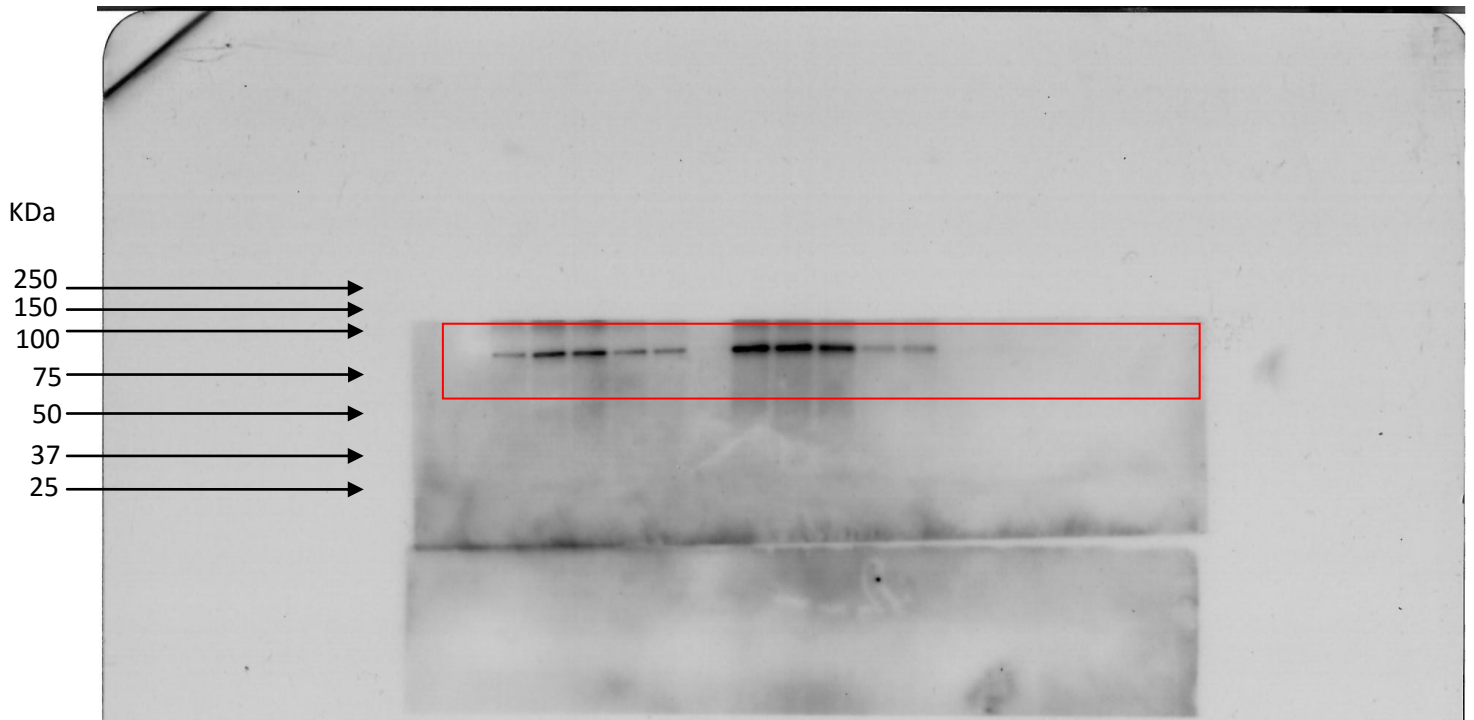



Figure 3c

IB: SHP-1<sup>S591</sup> (Vehicle)

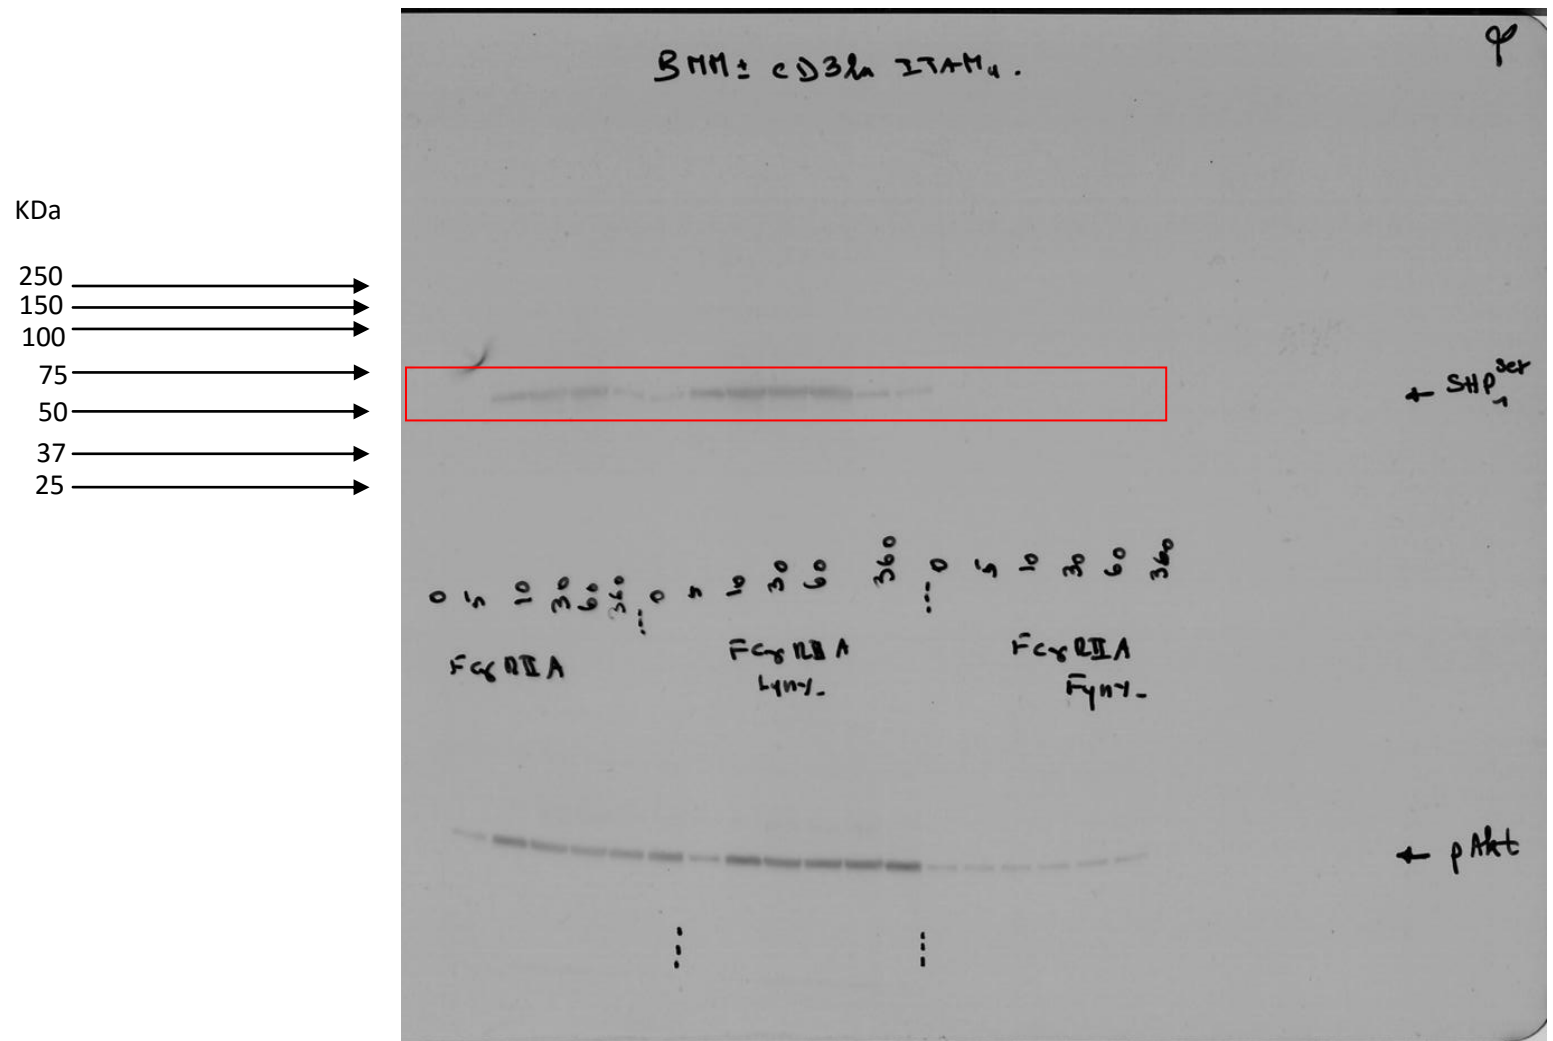

Figure 3c

IB: pAKT (Vehicle)

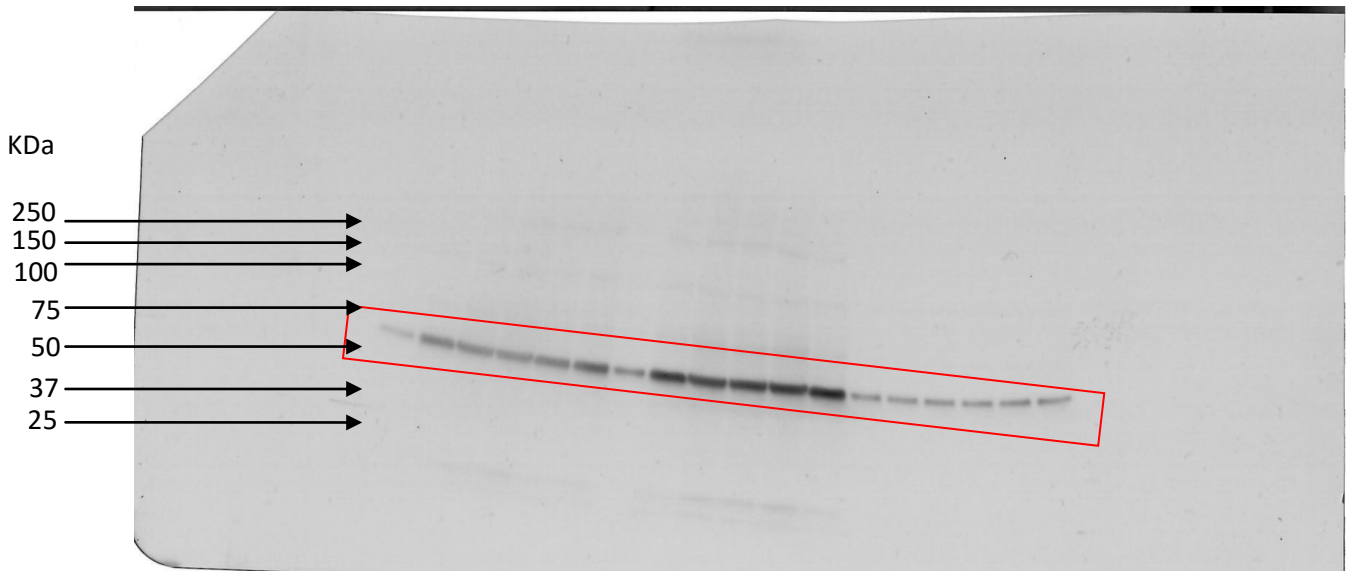

Figure 3c

IB: pPKC (IP3K inhibitor)

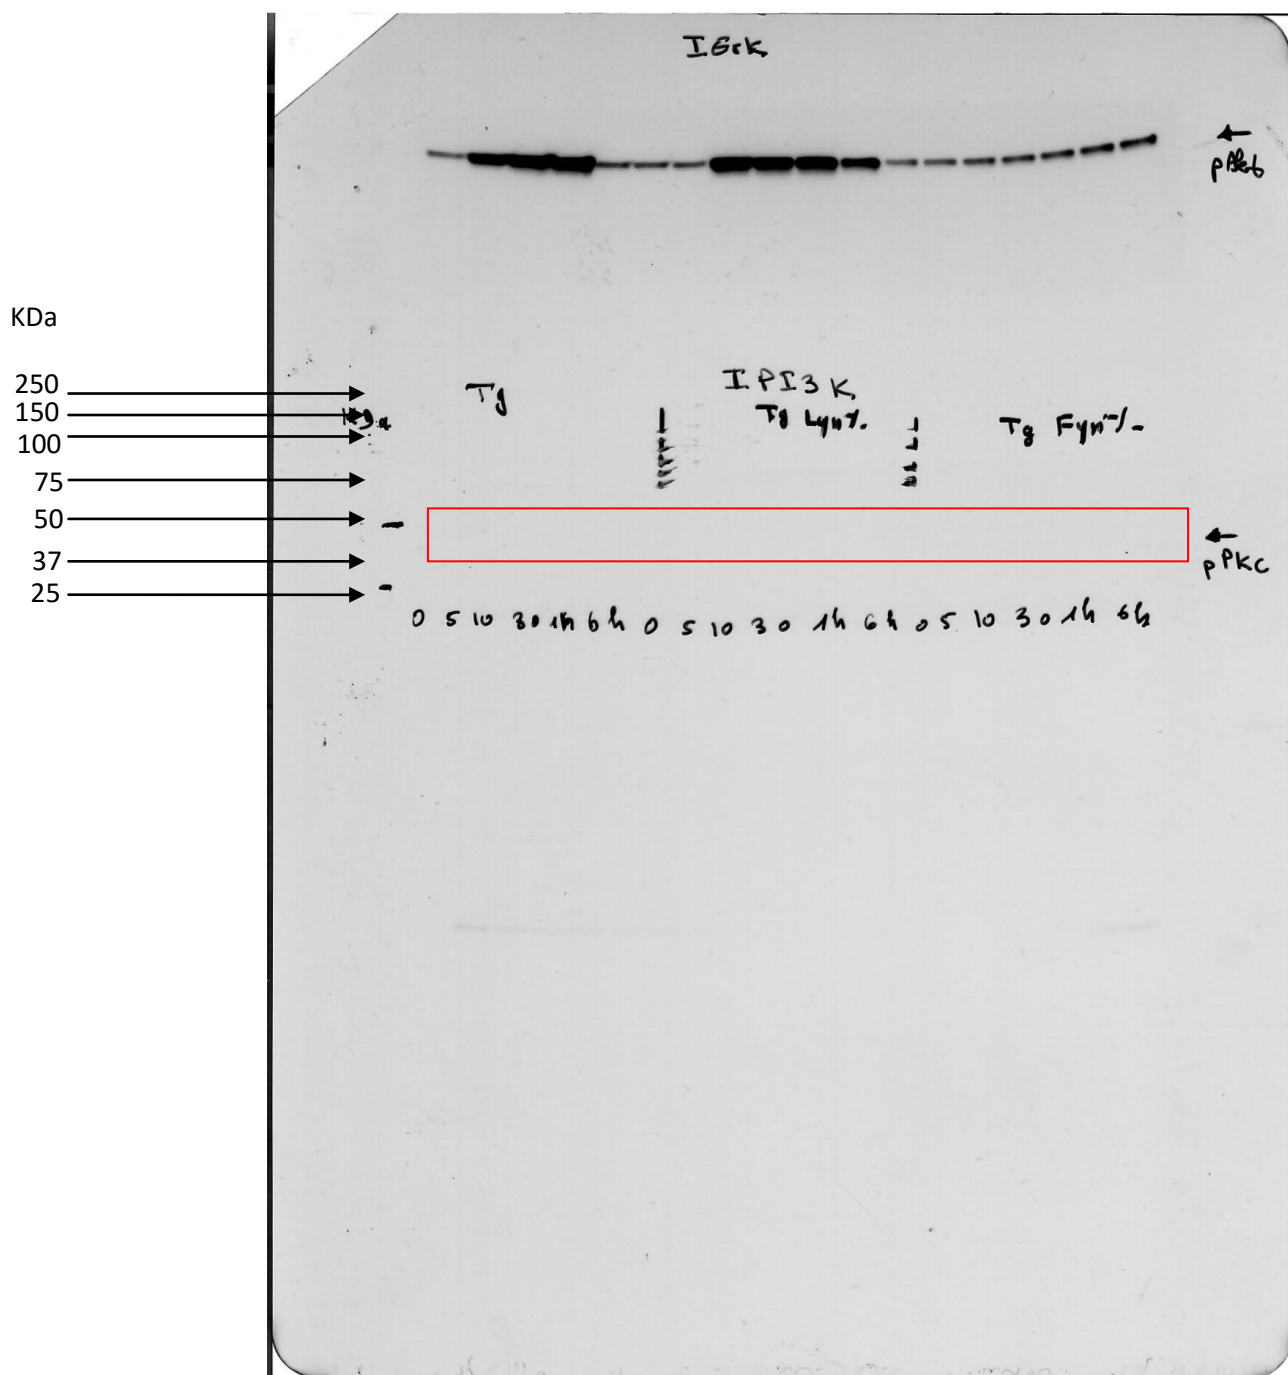

Figure 3c

IB : pPKC (ERK inhibitor)

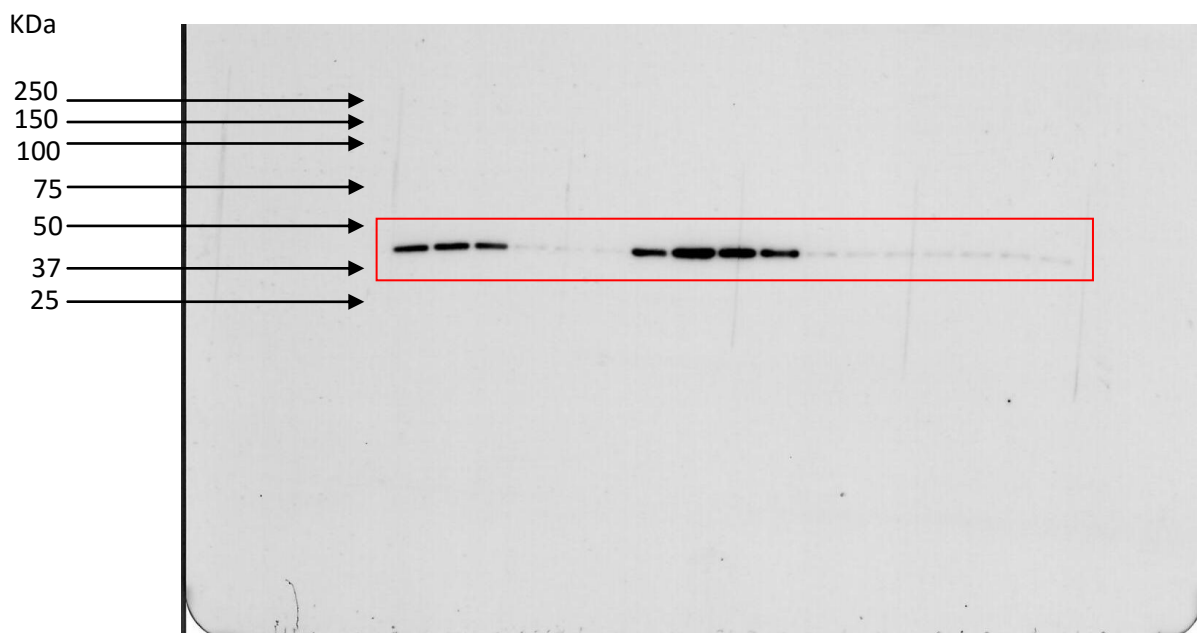

Figure 3c

IB: pAKT (PKC inhibitor)

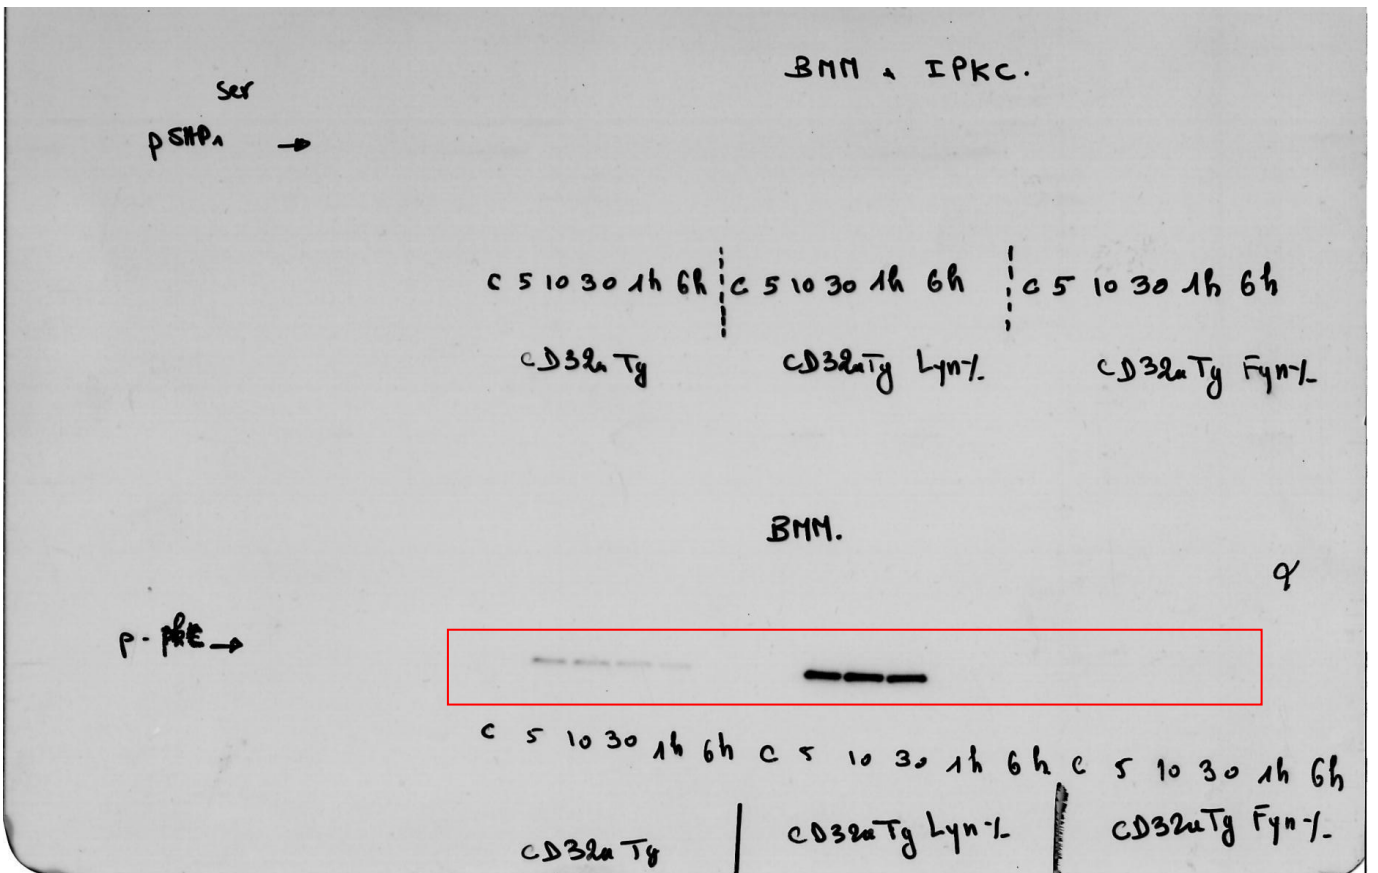

Figure 3c

IB: pERK (PI3K inhibitor)

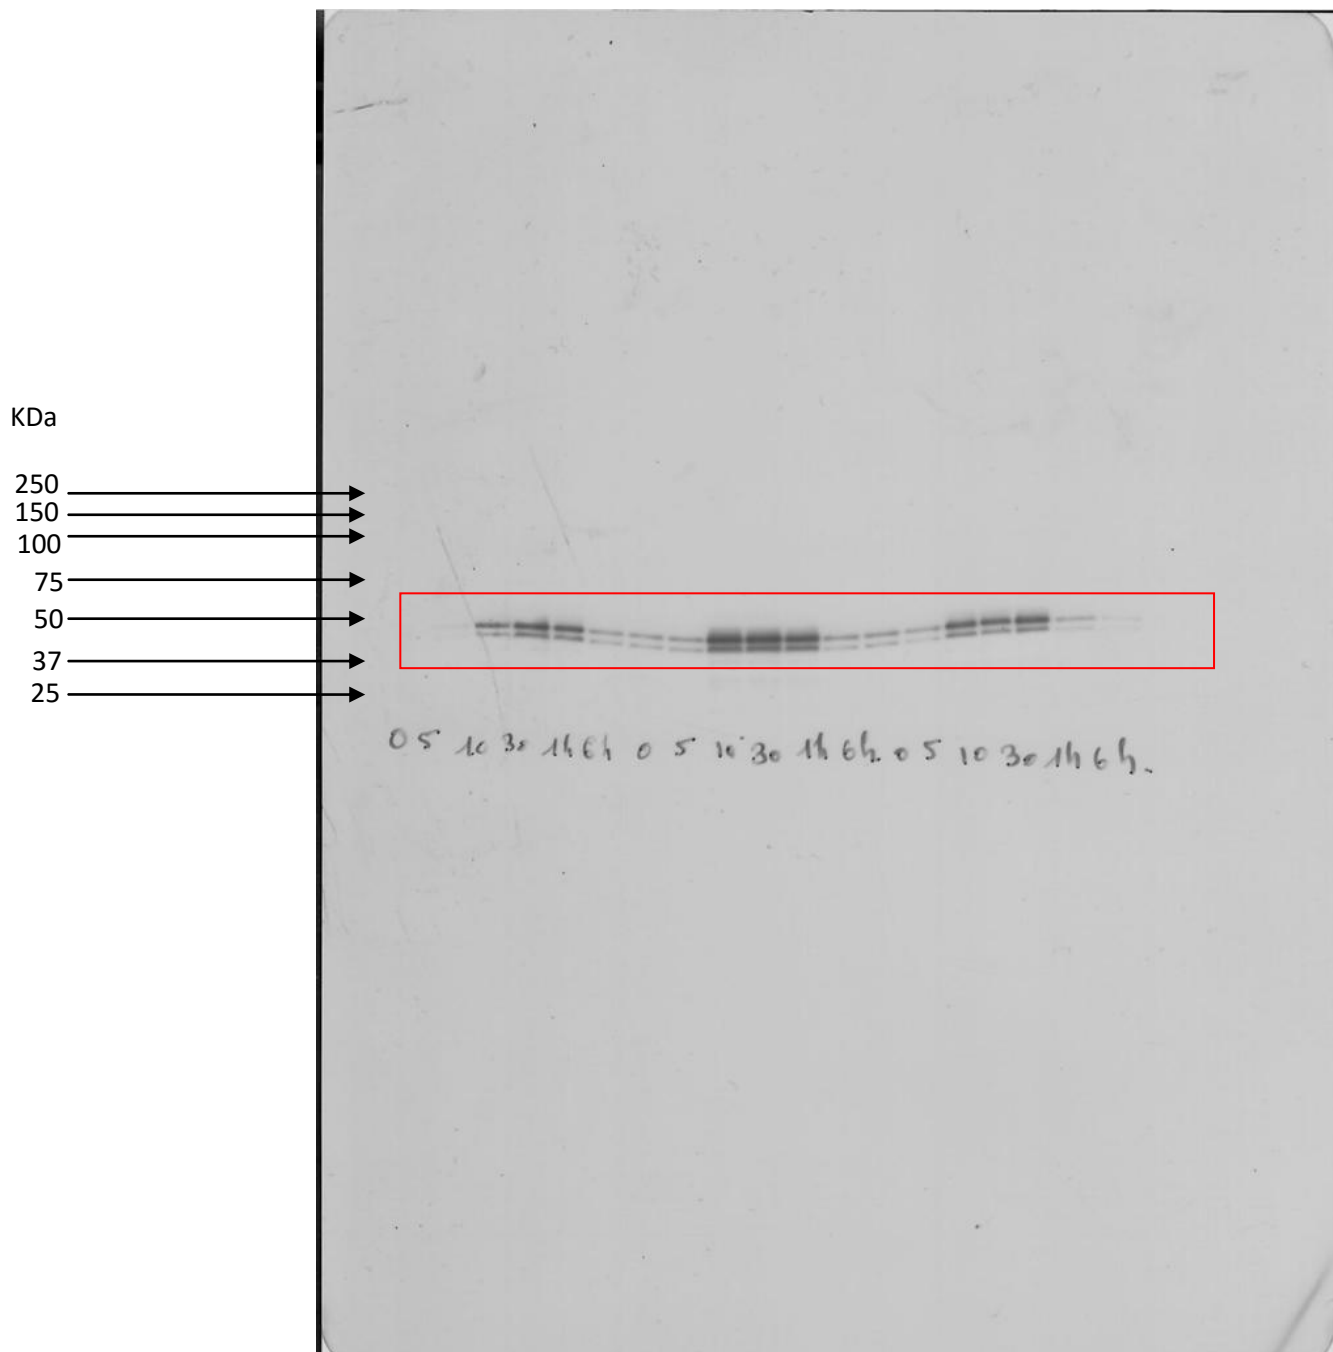

Figure 3c

IB: pERK (Vehicle)

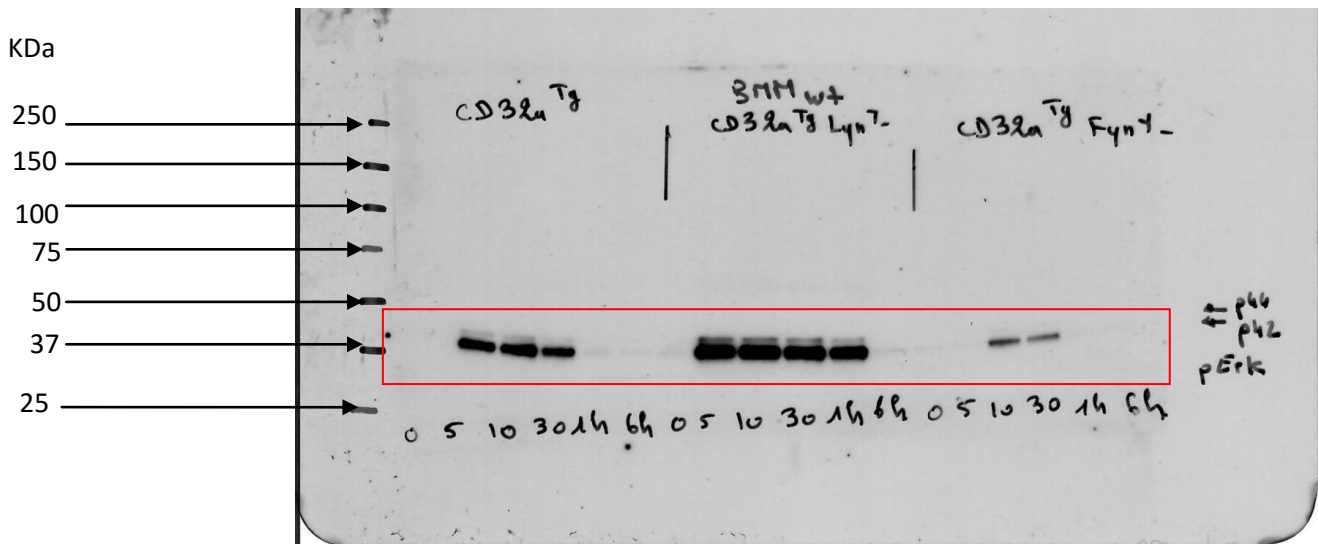

Figure 3c

IB: pSHP-1<sup>Y536</sup> (Vehicle)

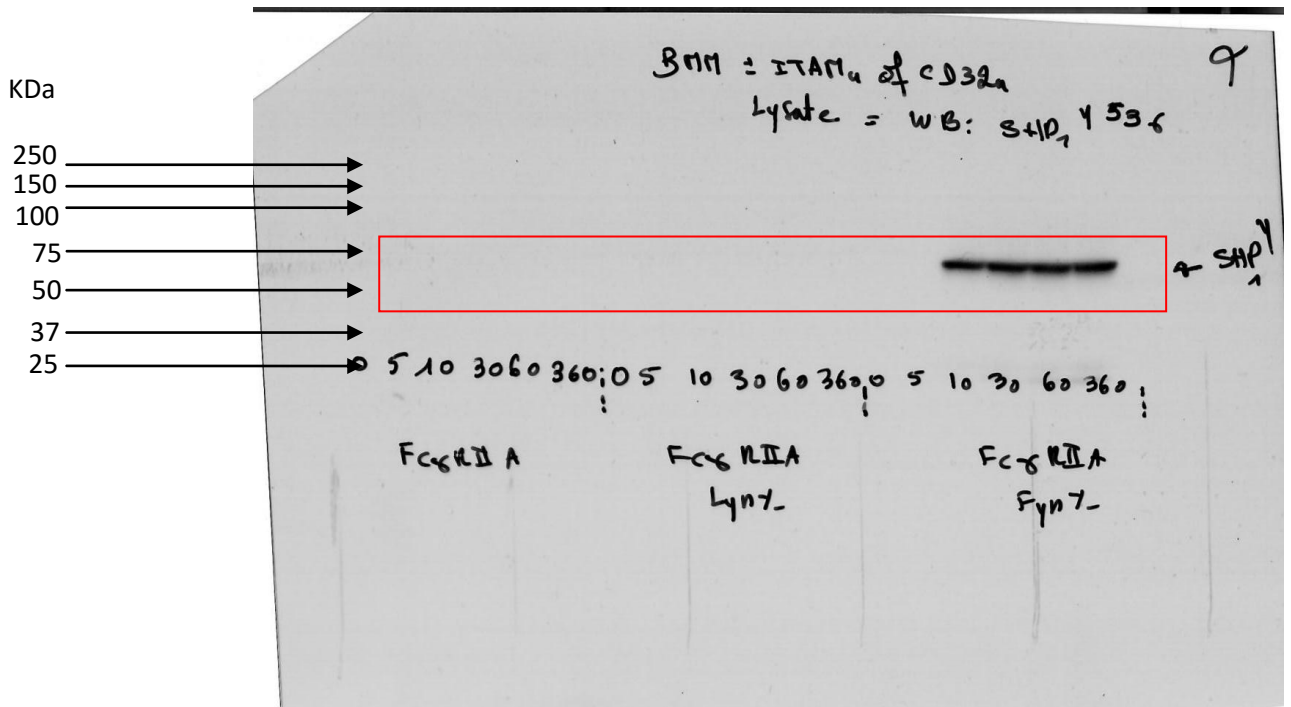



Figure 3c

IB : SHP-1<sup>Y536</sup> (PI3K inhibitor)

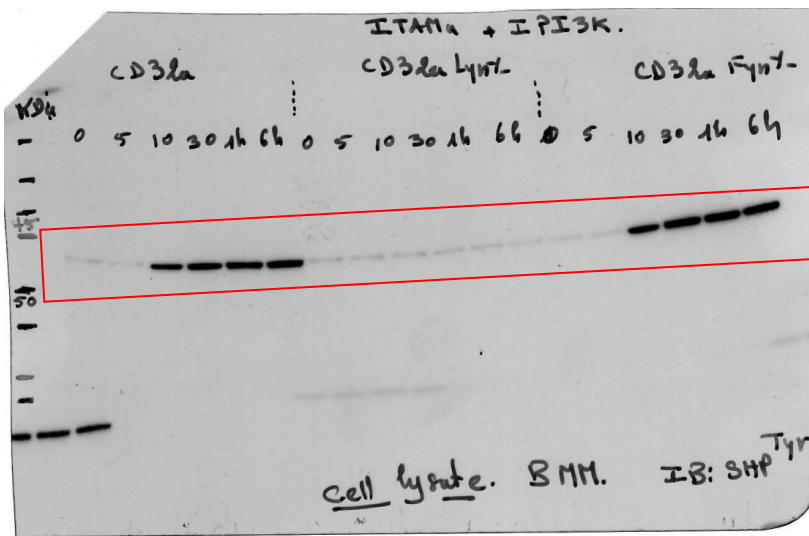

Figure 3c

IB : pERK (ERK inhibitor)

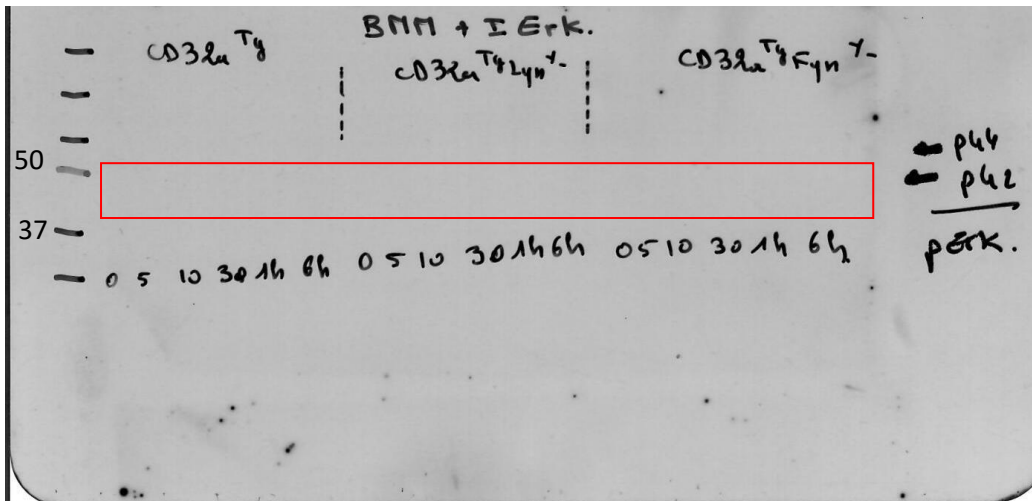

Figure 3c

IB : pSHP-1<sup>Y536</sup> (ERK inhibitor)

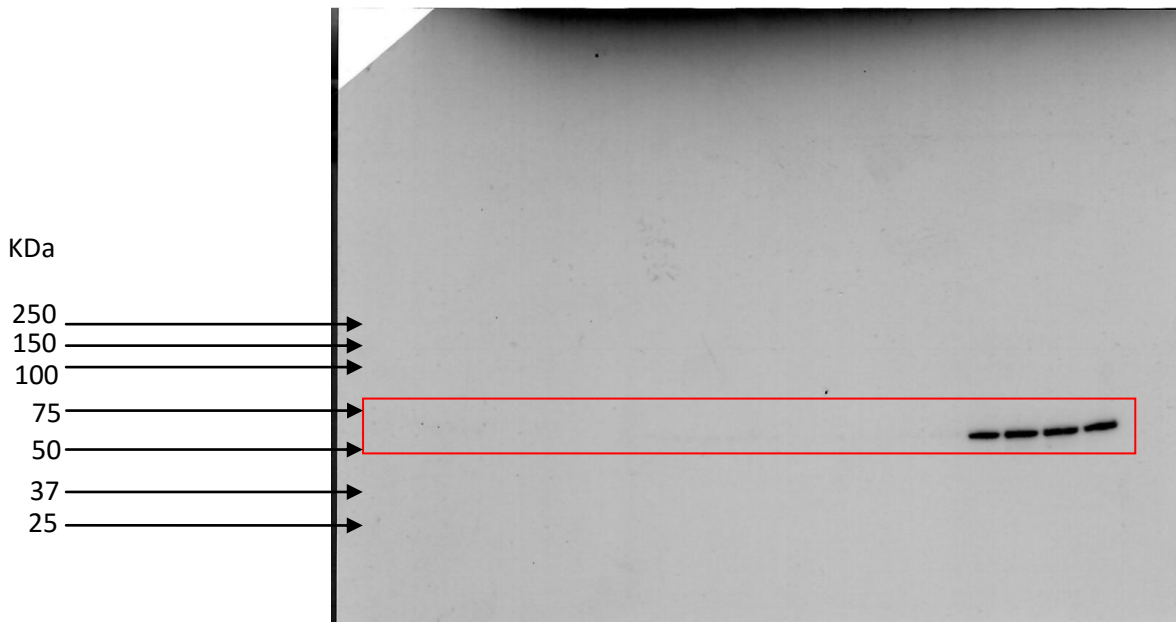

Figure 3d

IB: actin

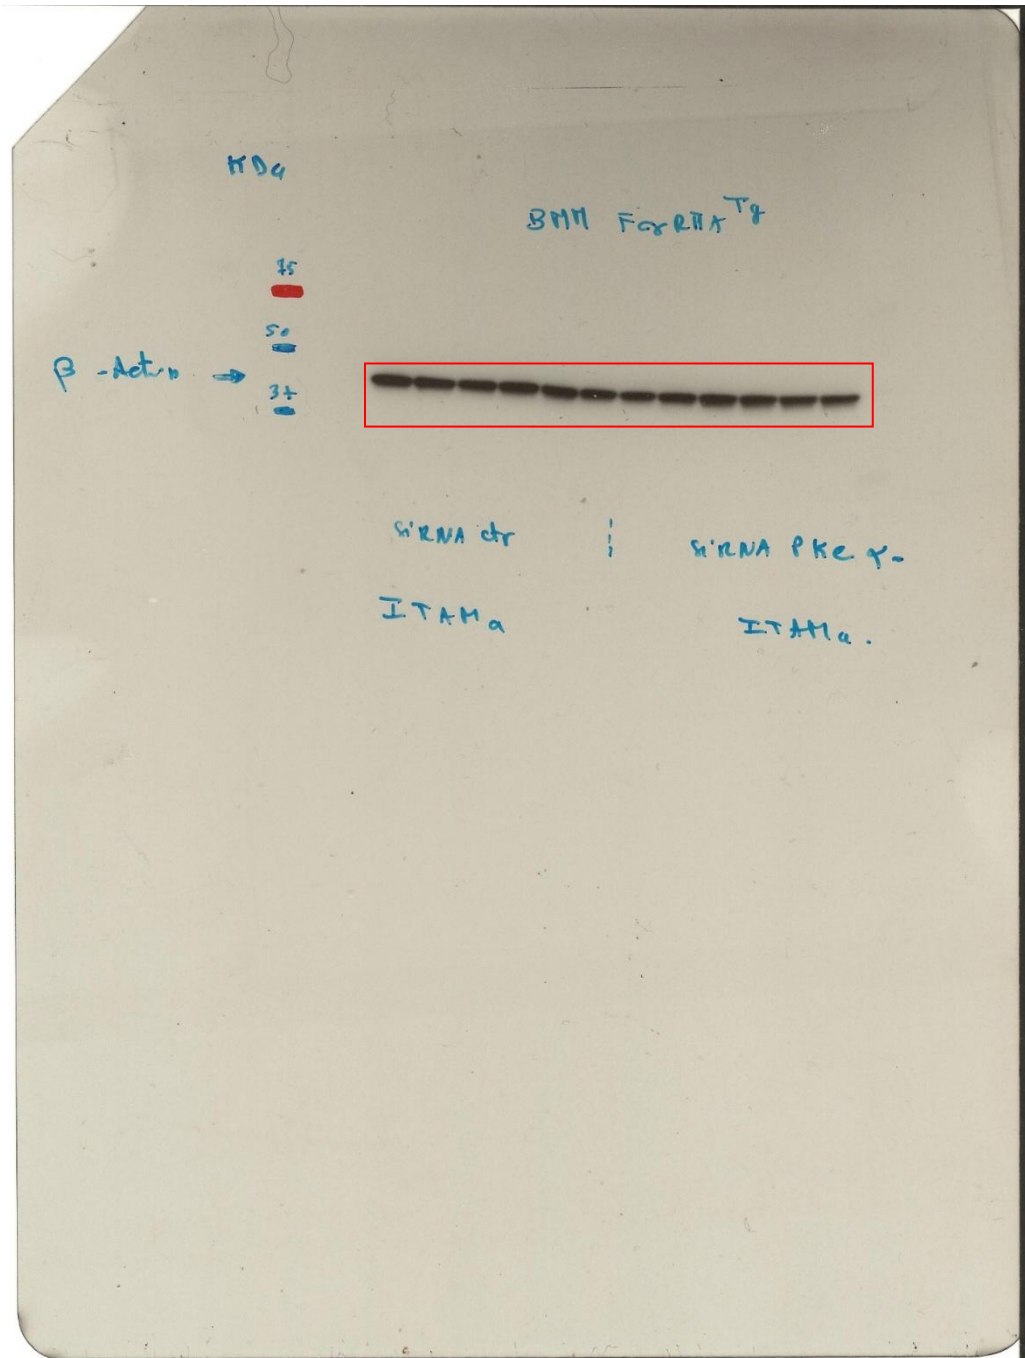

Figure 3d

IB: SHP-1

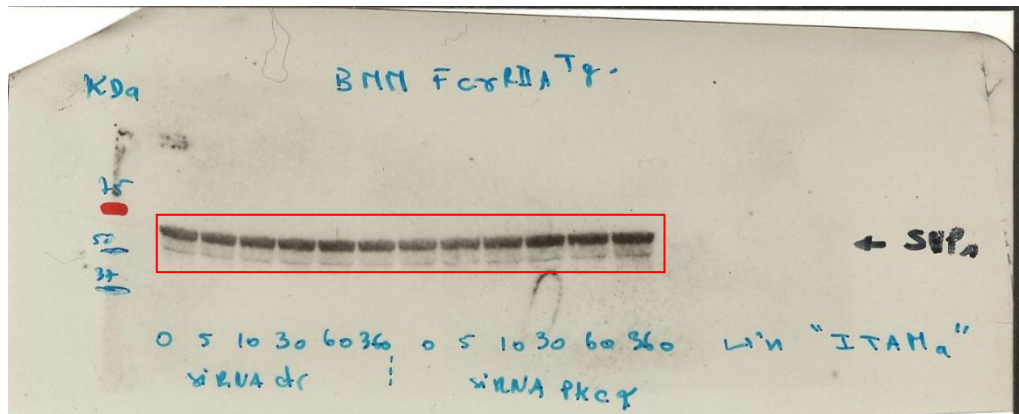

Figure 3d  
IB: SHP-1<sup>Y536</sup>

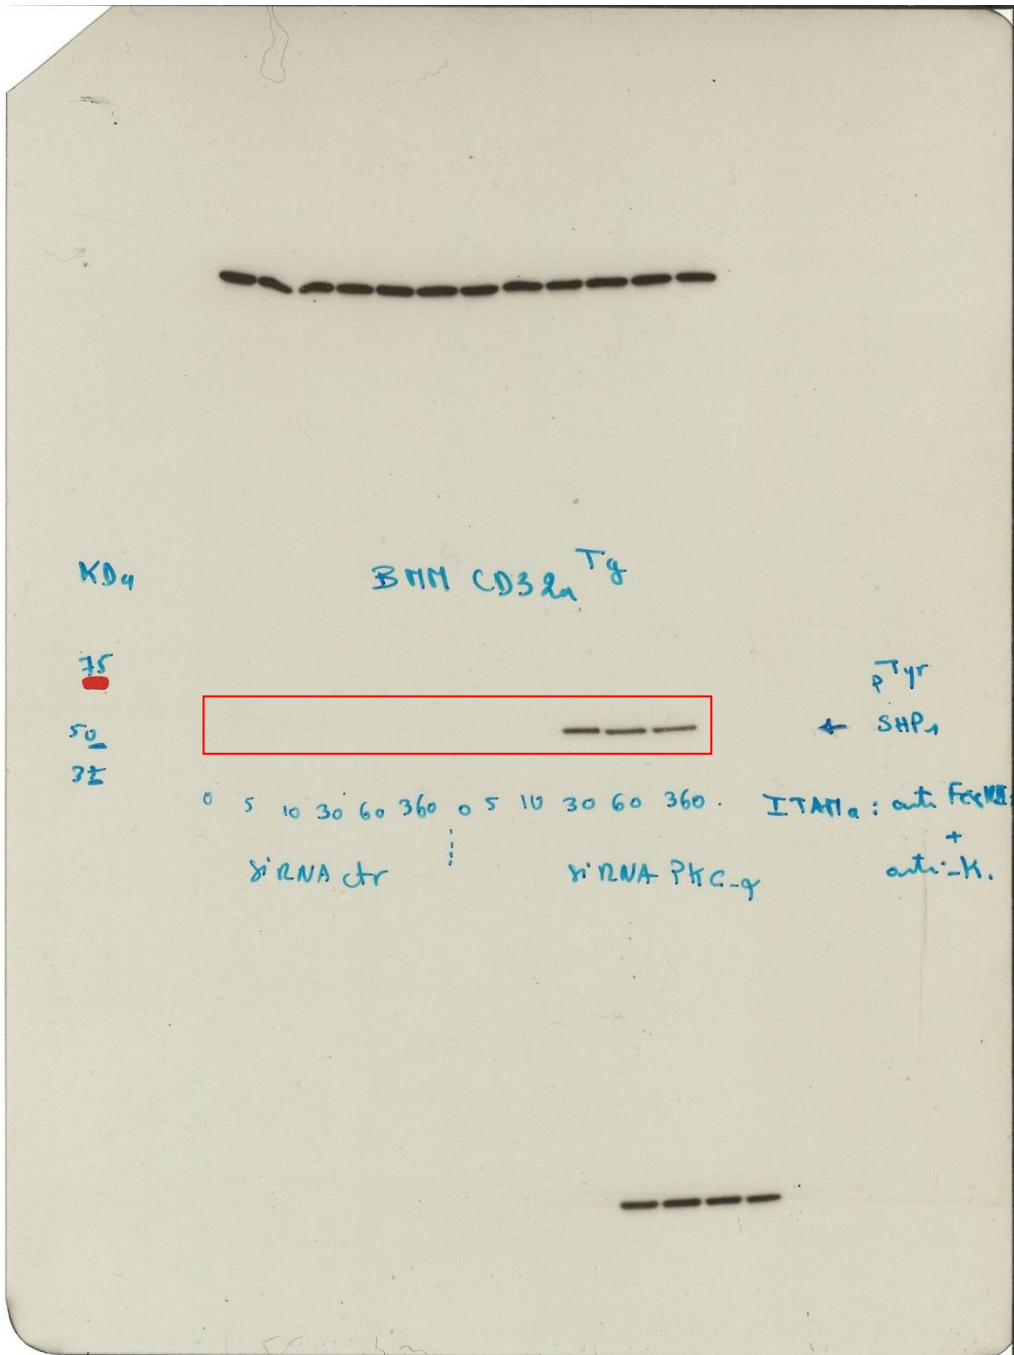

Figure 3d

IB: SHP-1<sup>S591</sup>

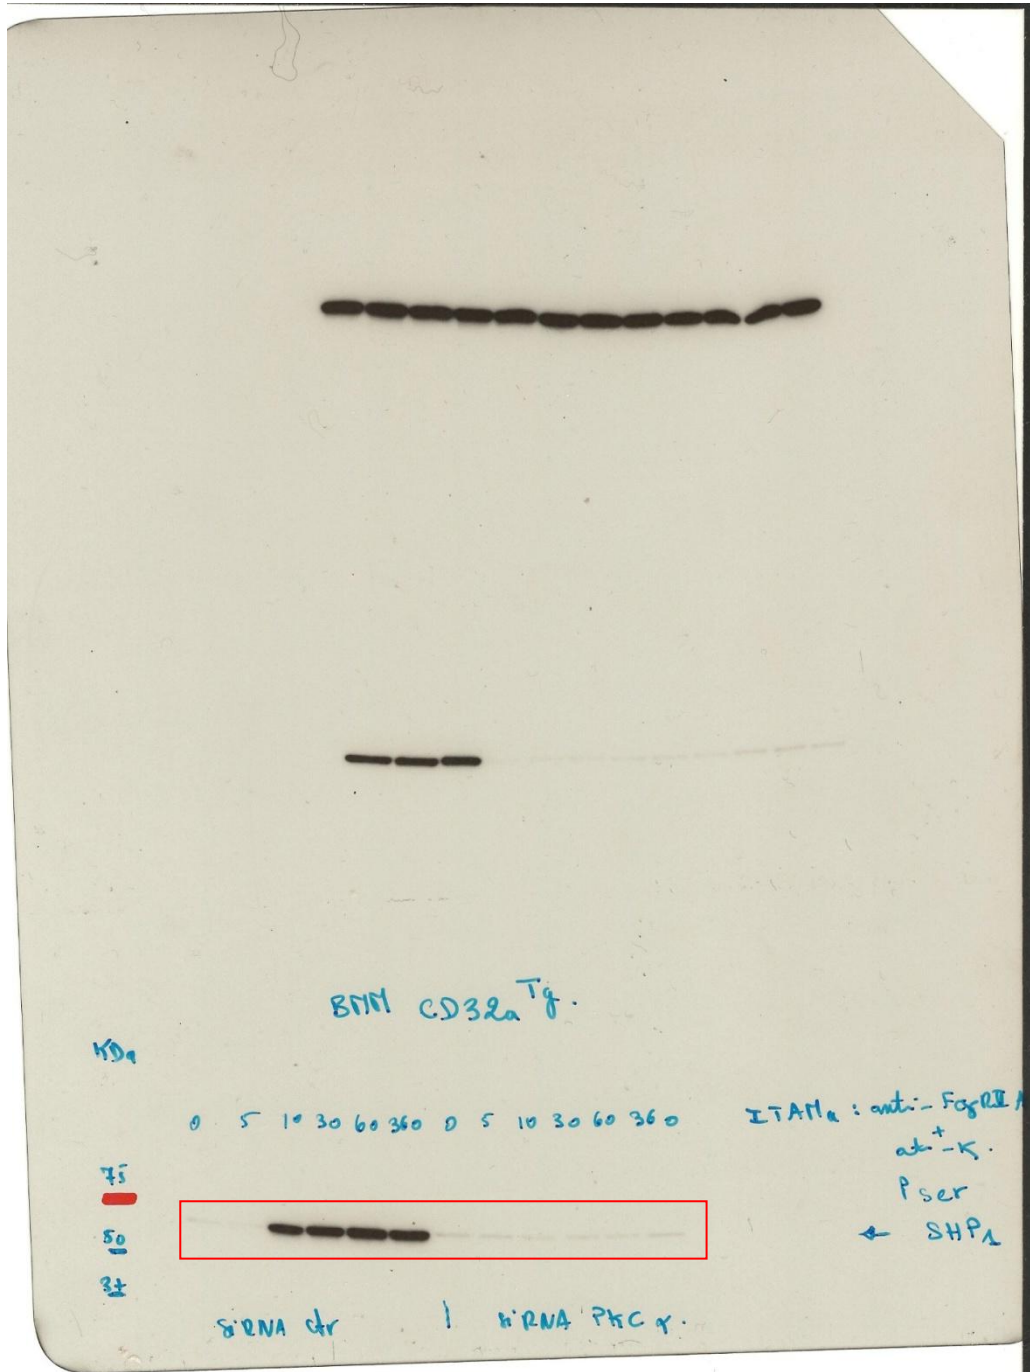



Figure 3d

IB: PKC $\alpha$

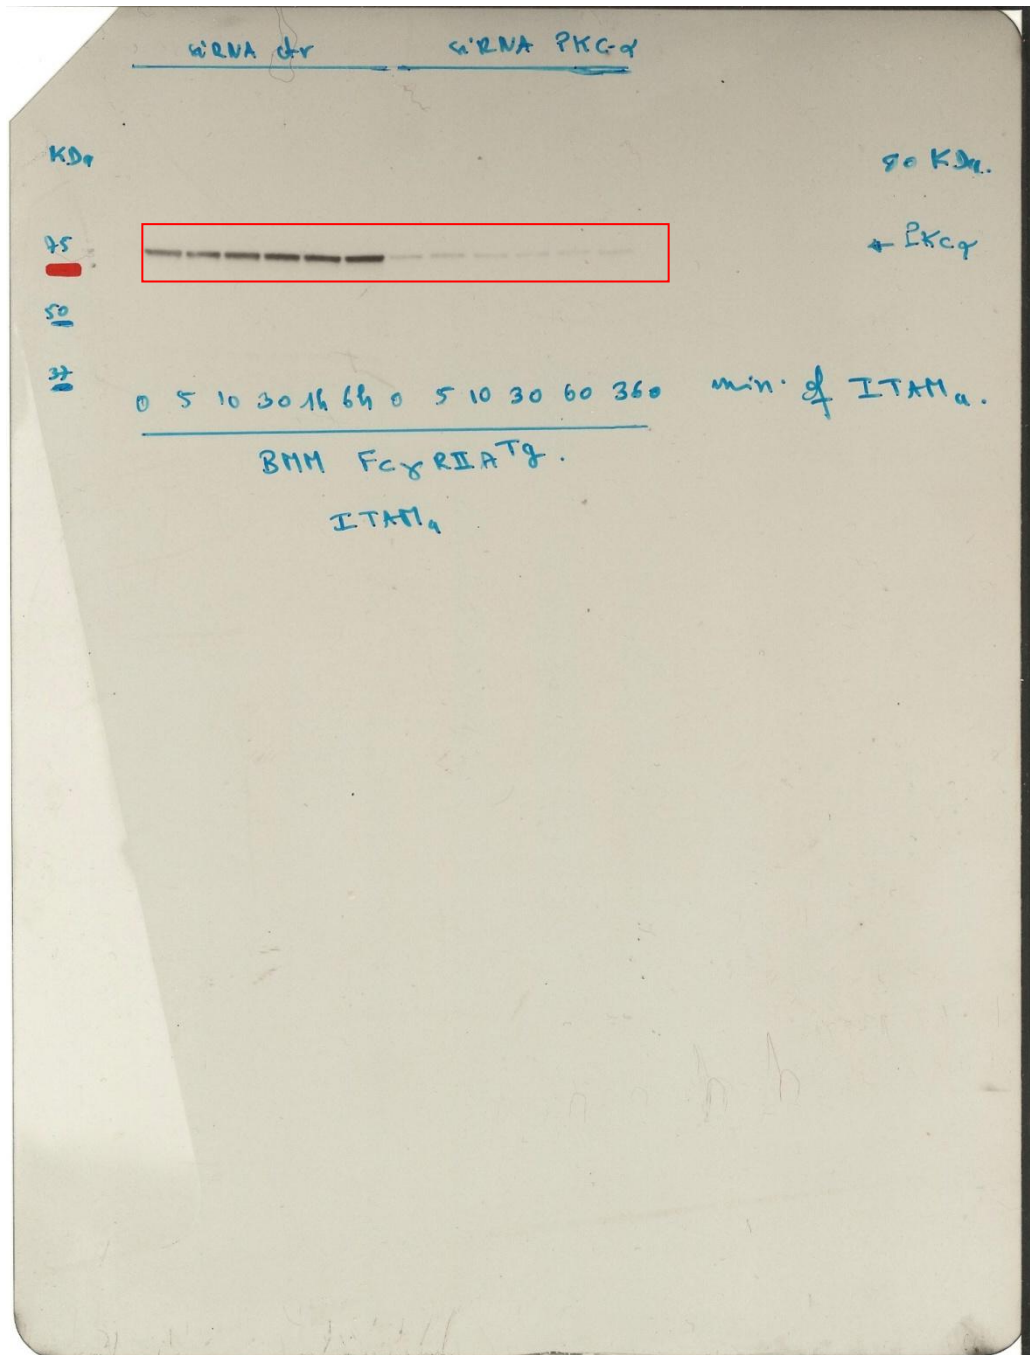



Figure 3e

IB: PKC $\alpha$

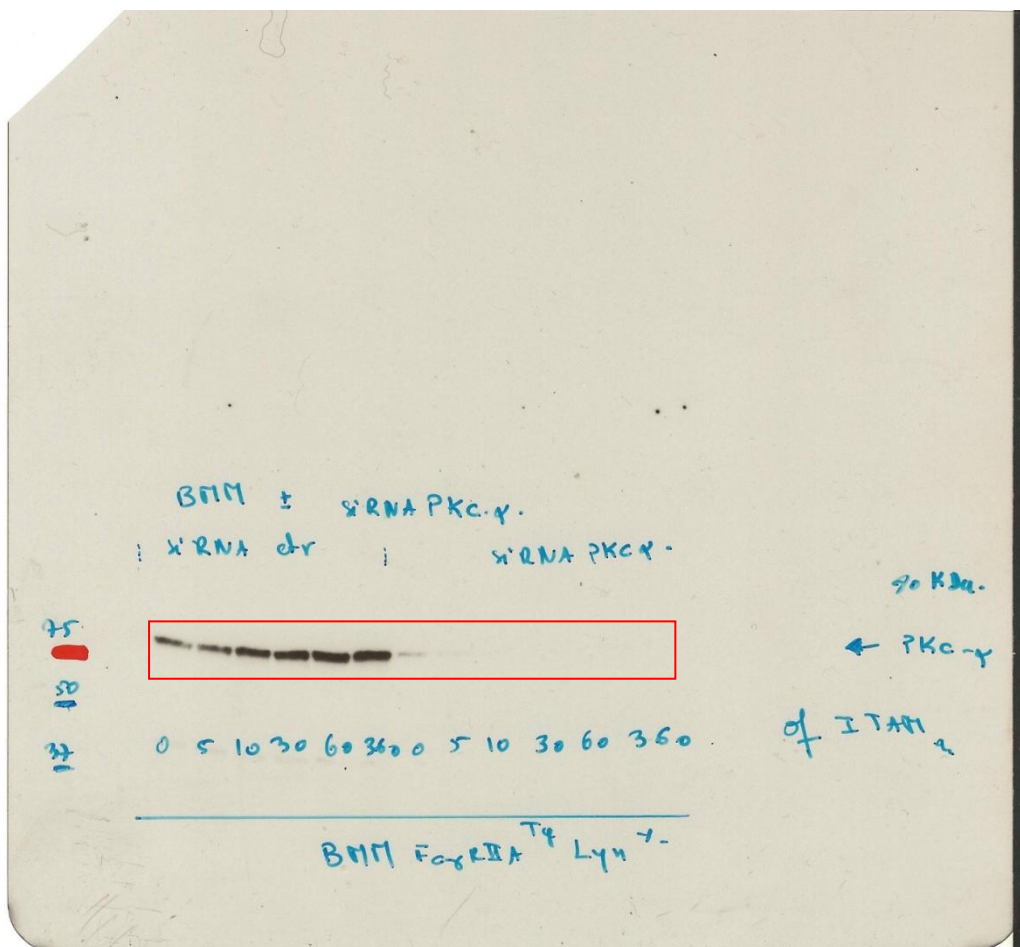

Figure 3e

IB: pSHP-1<sup>S591</sup>

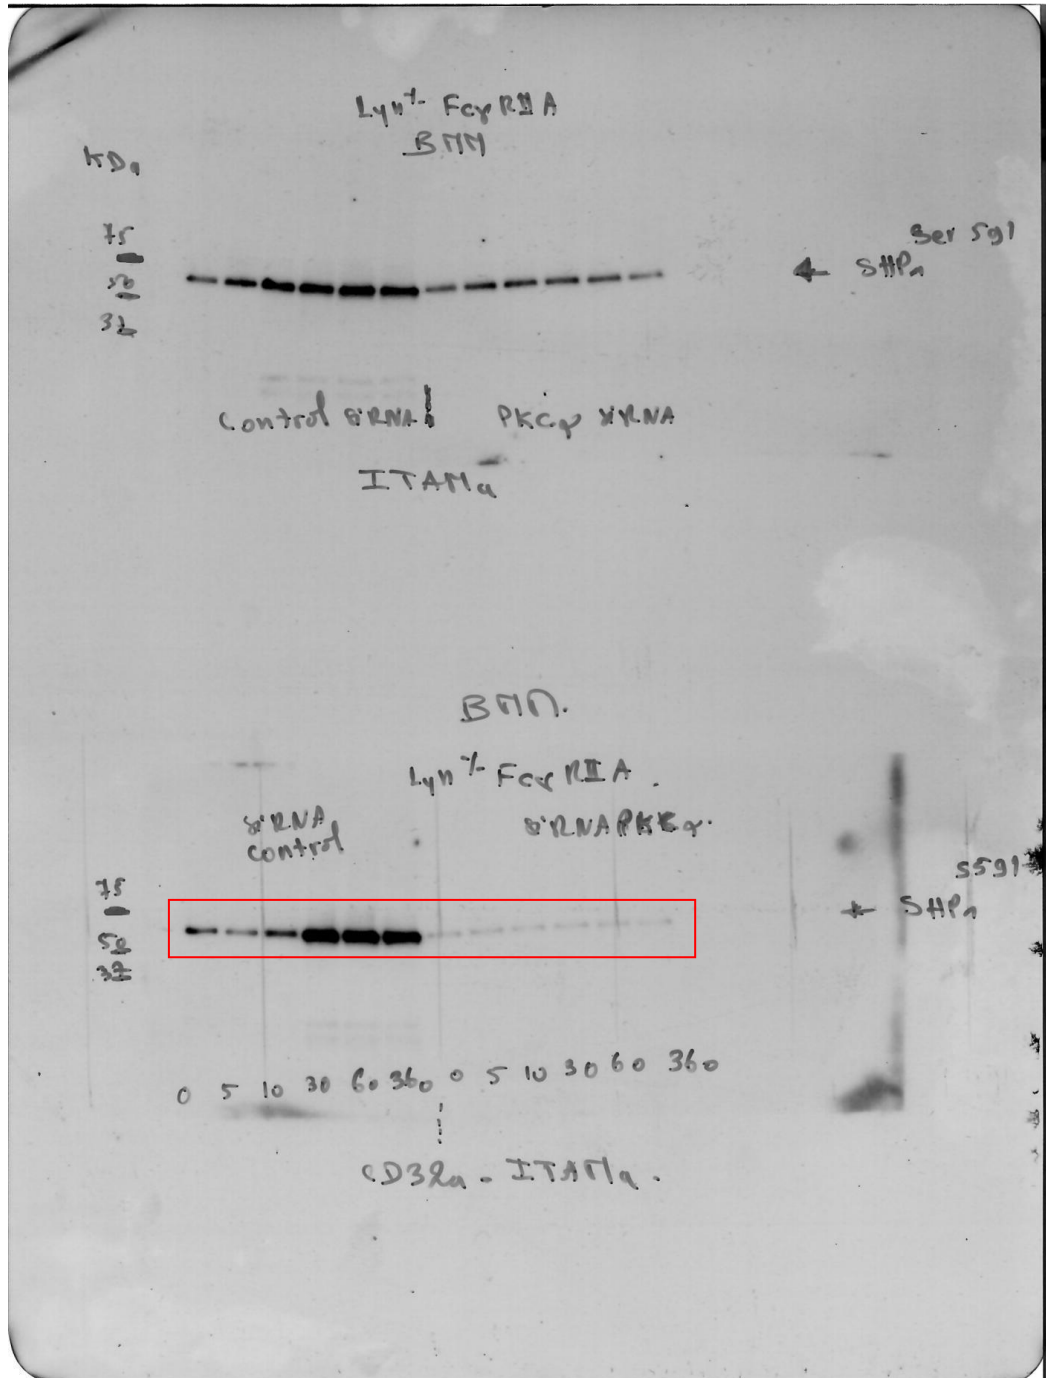

Figure 3e

IB: pSHP-1<sup>Y536</sup>

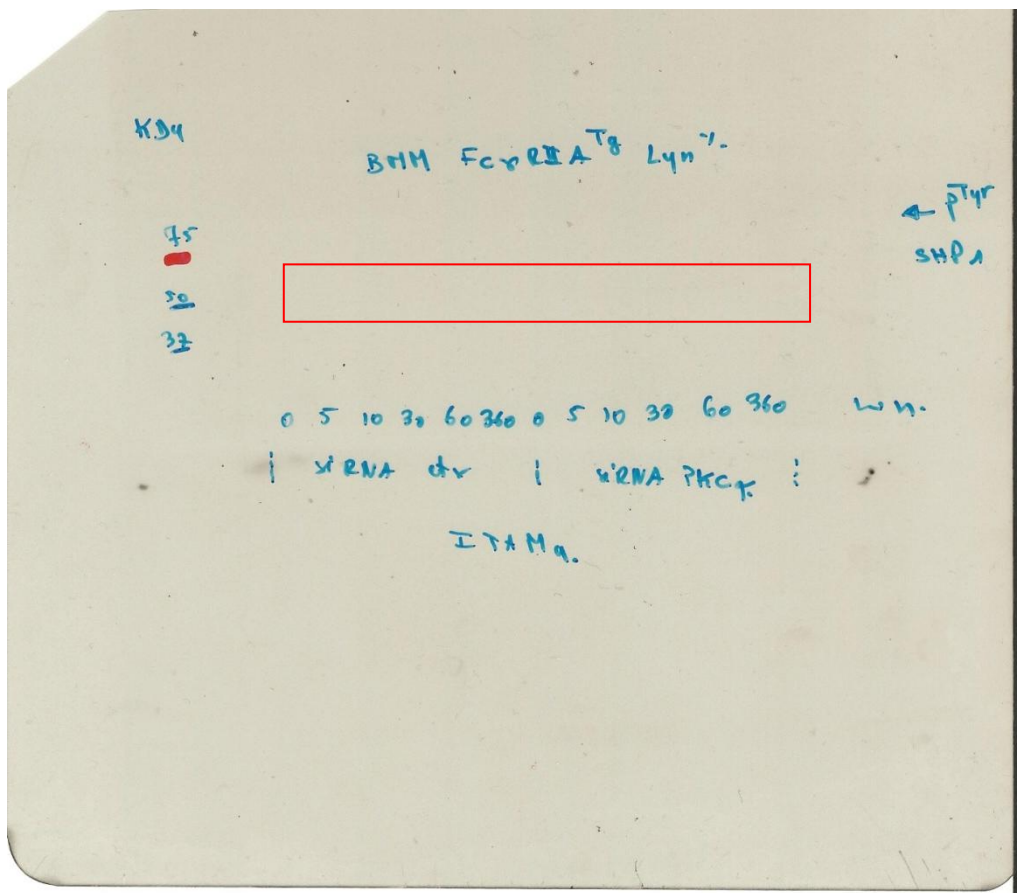

Figure 3e

IB: SHP-1

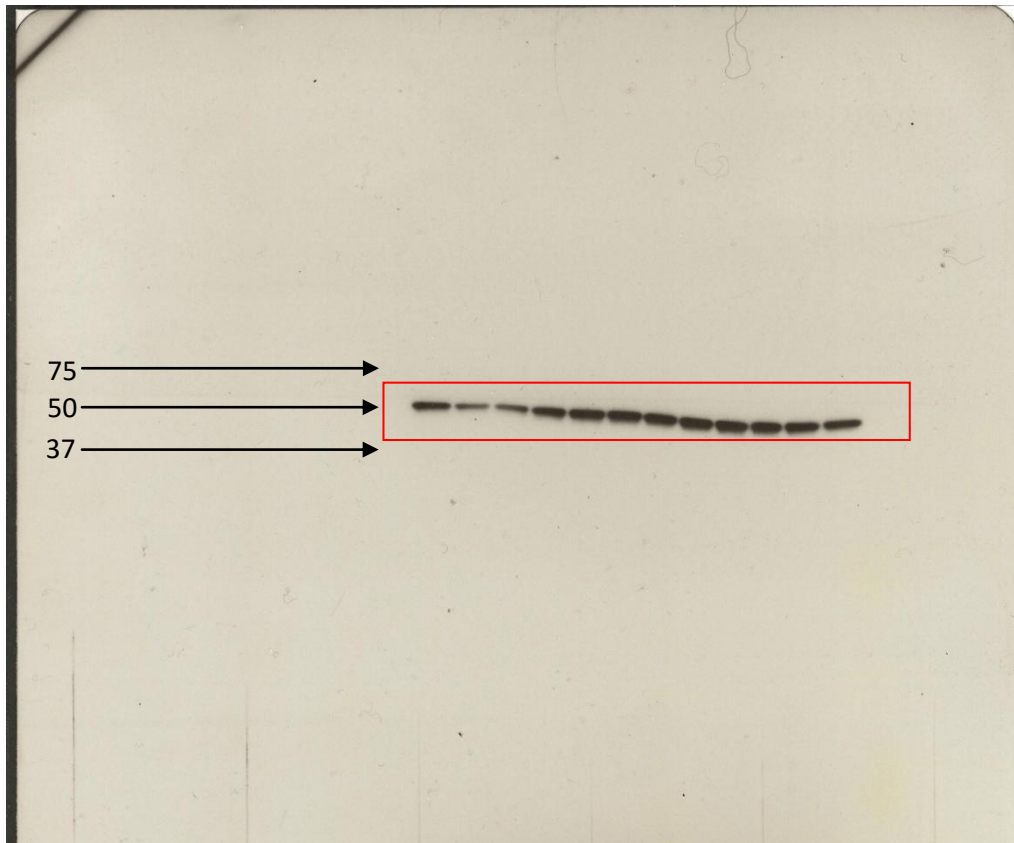

Figure 3f

IB: PKC $\alpha$

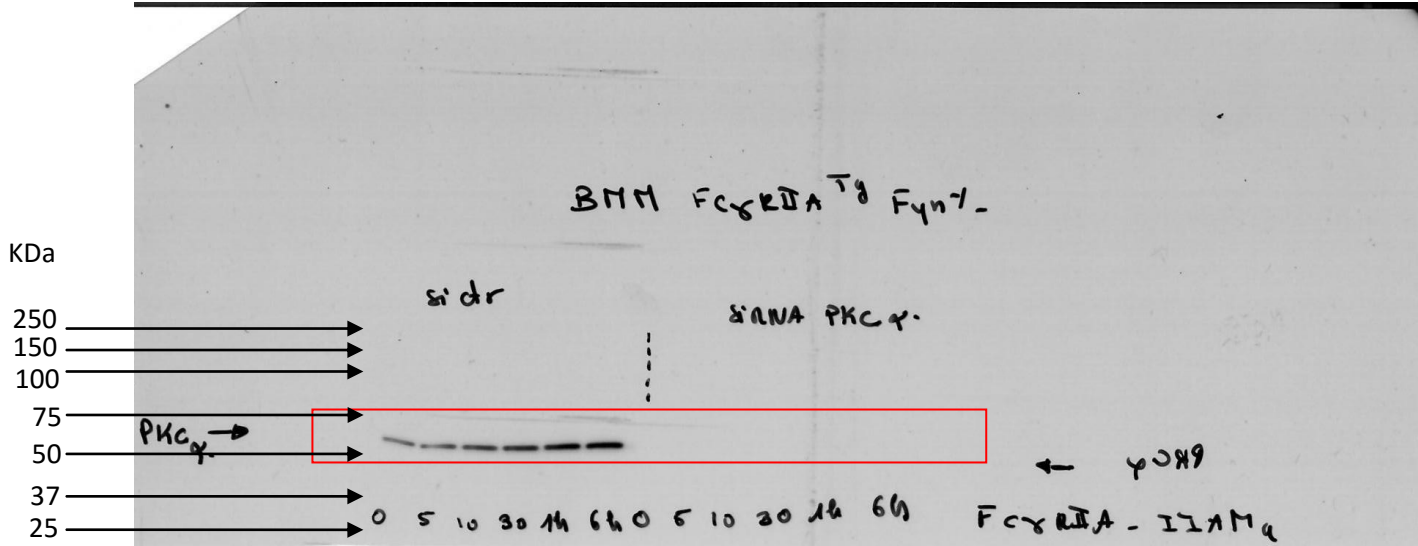

Figure 3f  
IB: SHP-1<sup>Y536</sup>

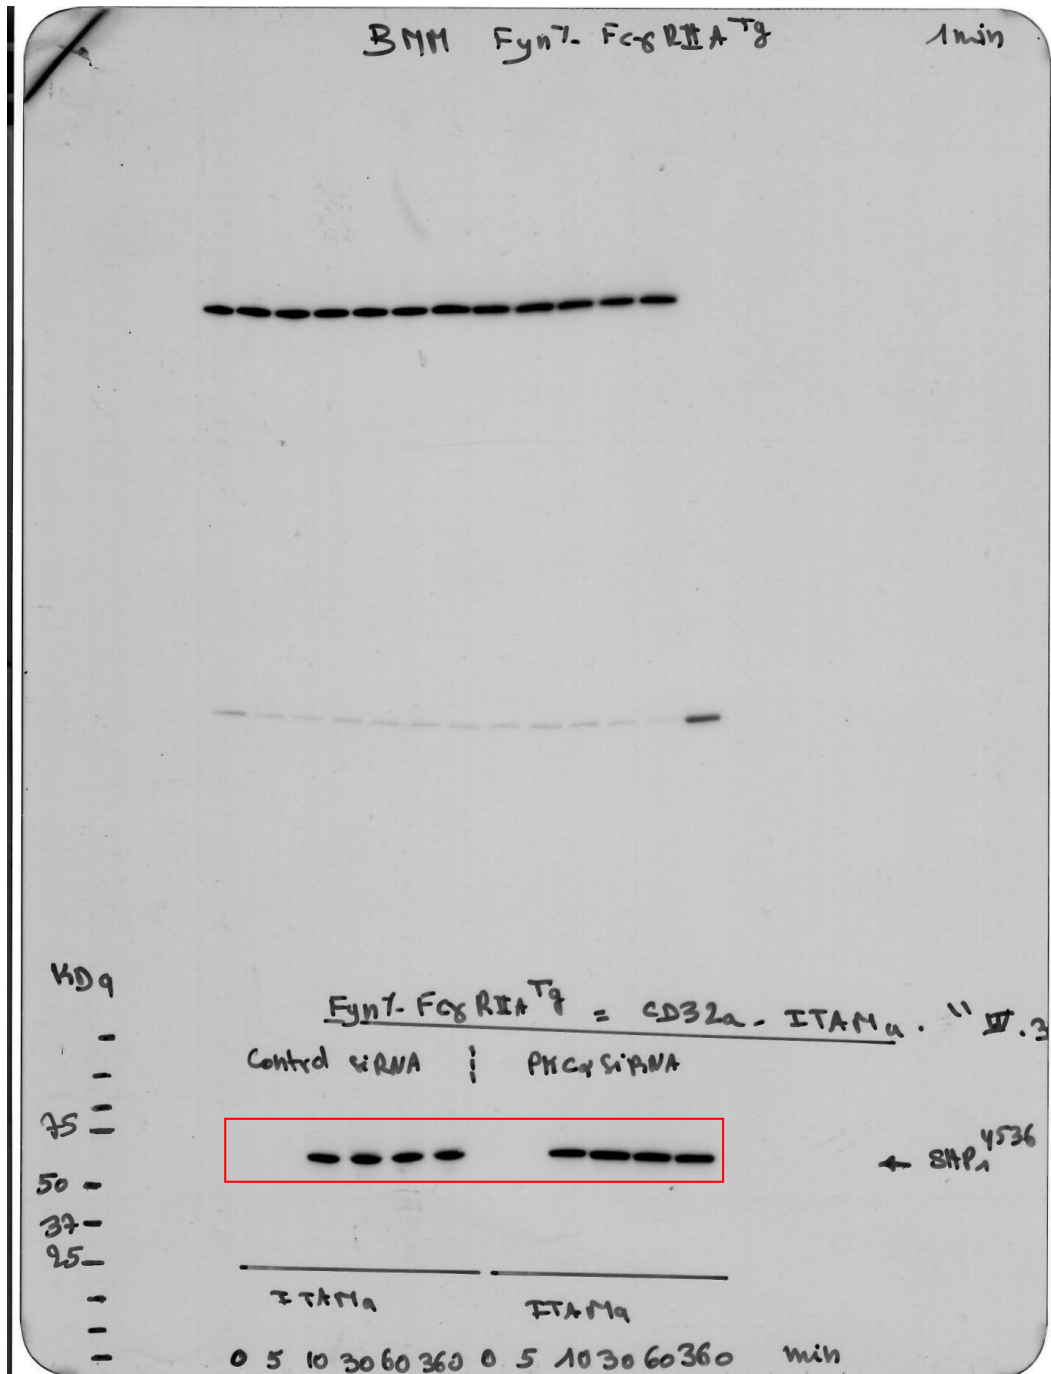

Figure 3f

IB: SHP-1

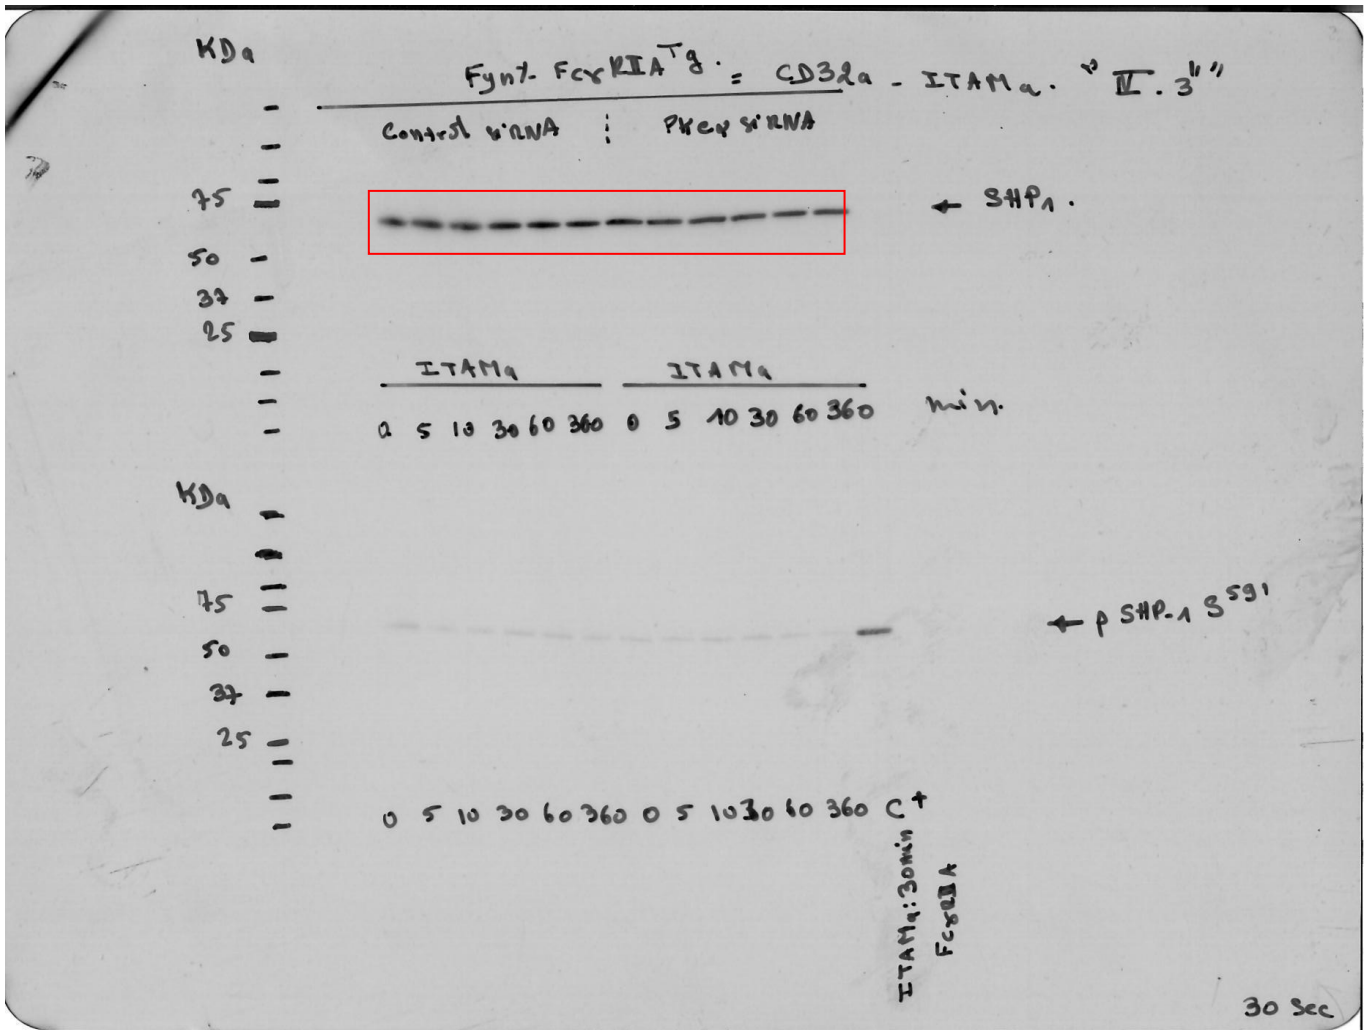



Figure 3f  
 IB: pSHP-1<sup>S591</sup>

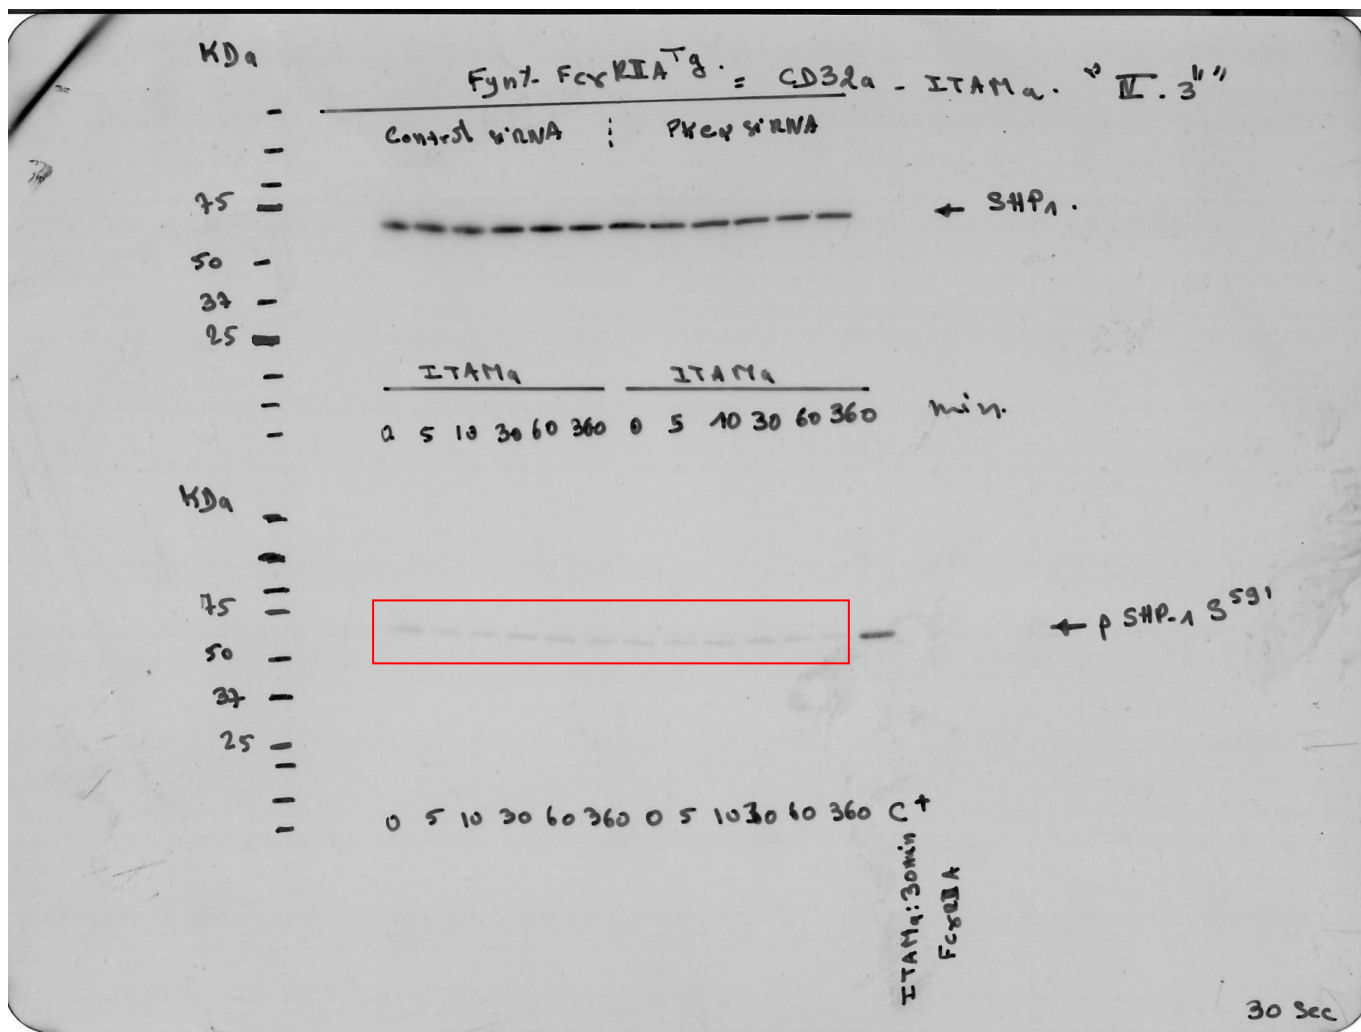



Figure 3f

IB: actin

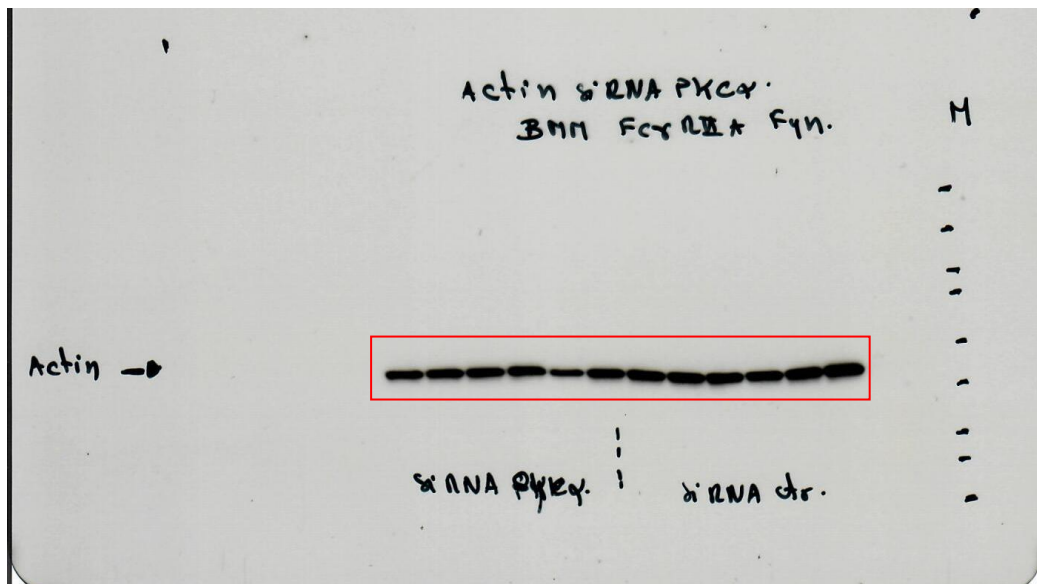

Figure 7a  
 IB: Fyn, Lysate

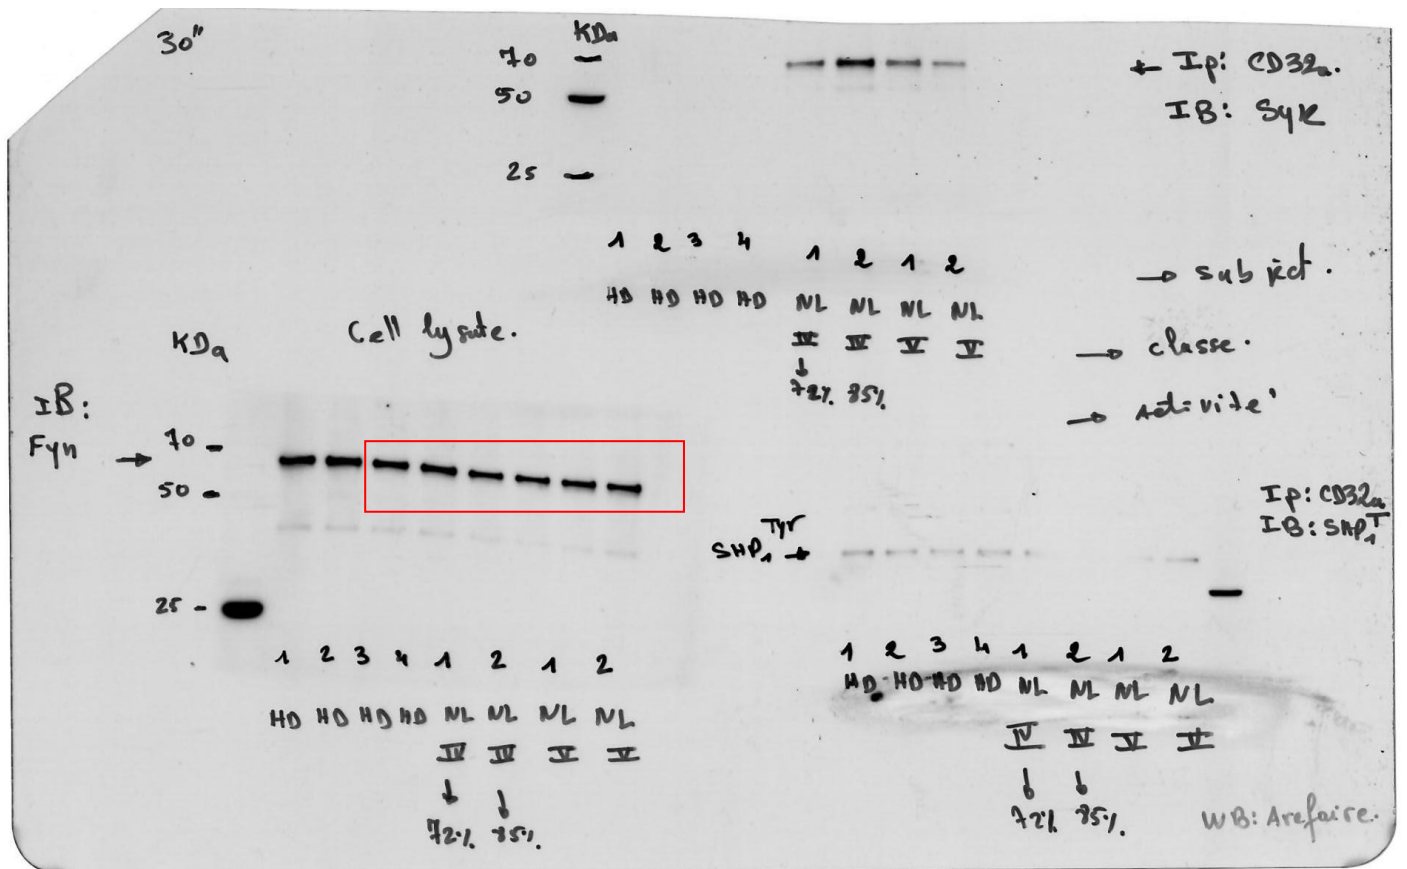

# Figure 7a

IB: Syk, IP: FcγRIIA

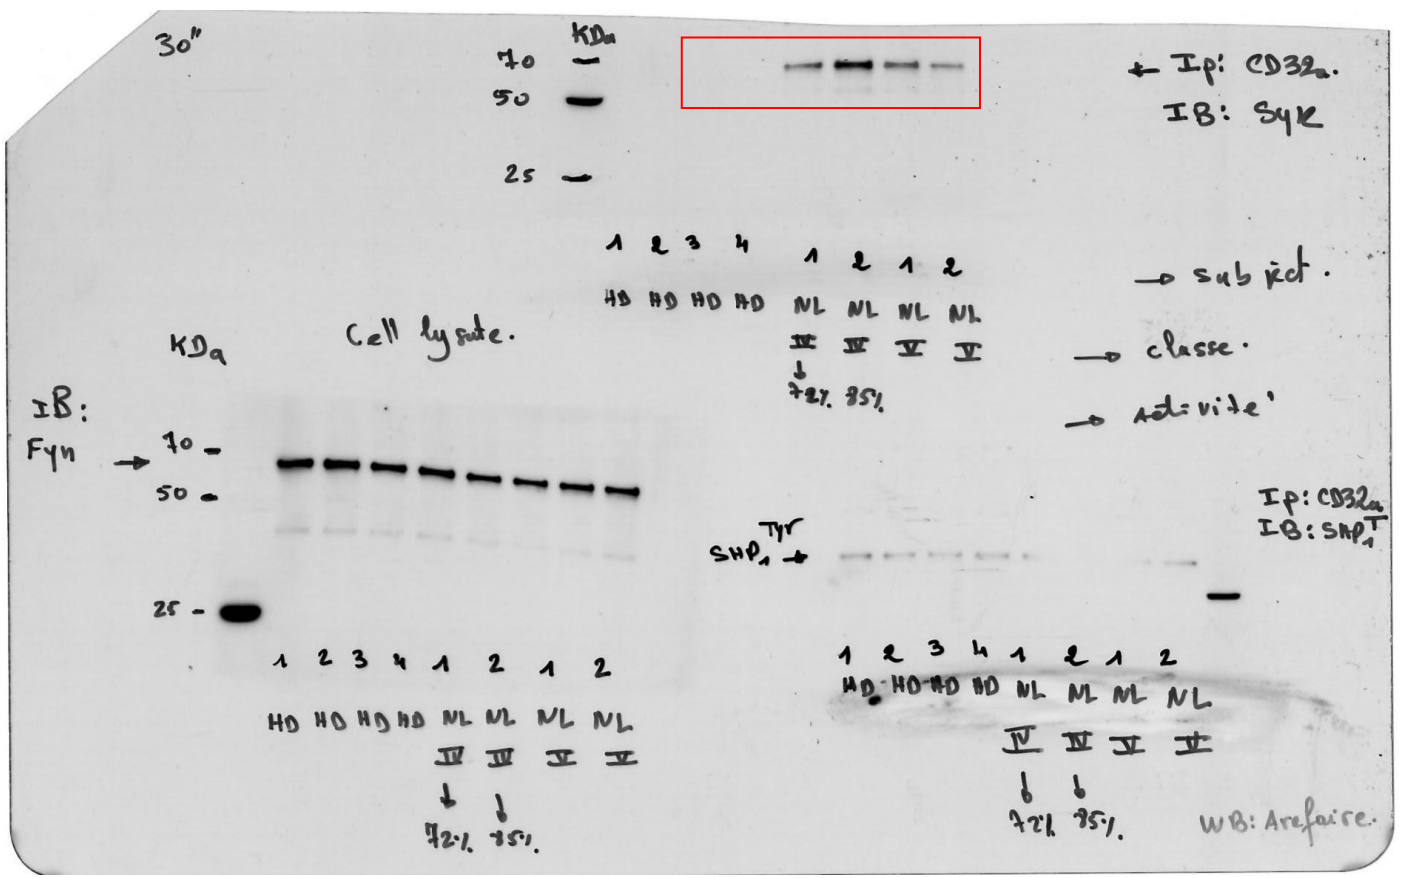

Figure 7a

IB: pPKC $\alpha$ , IP: Fc $\gamma$ RIIA

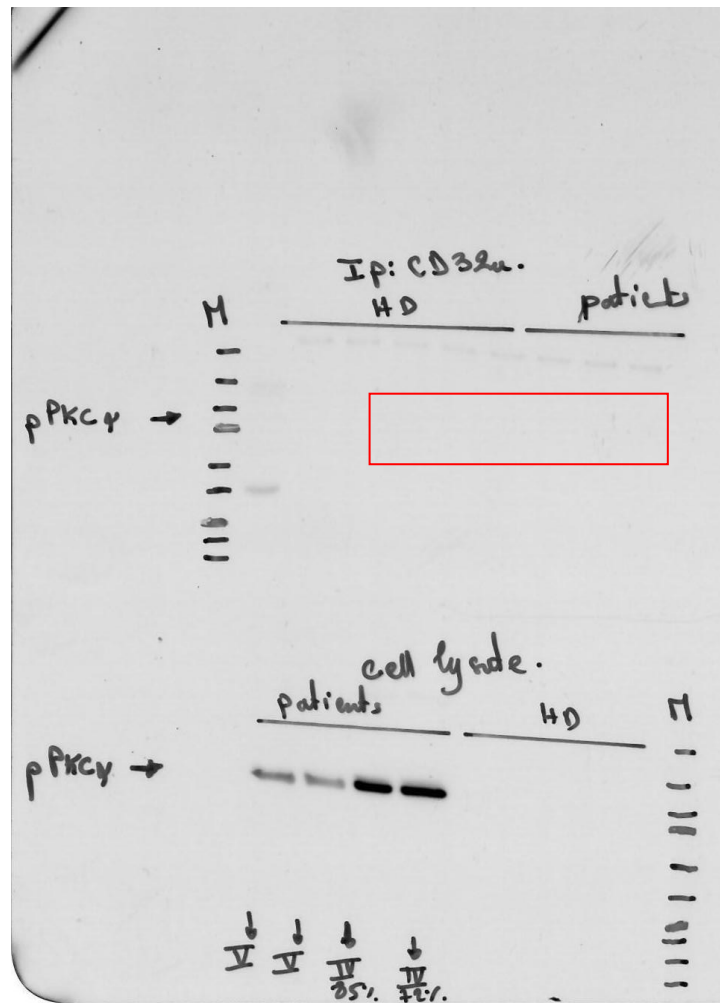

Figure 7a

IB: pPKC $\alpha$ , Lysate

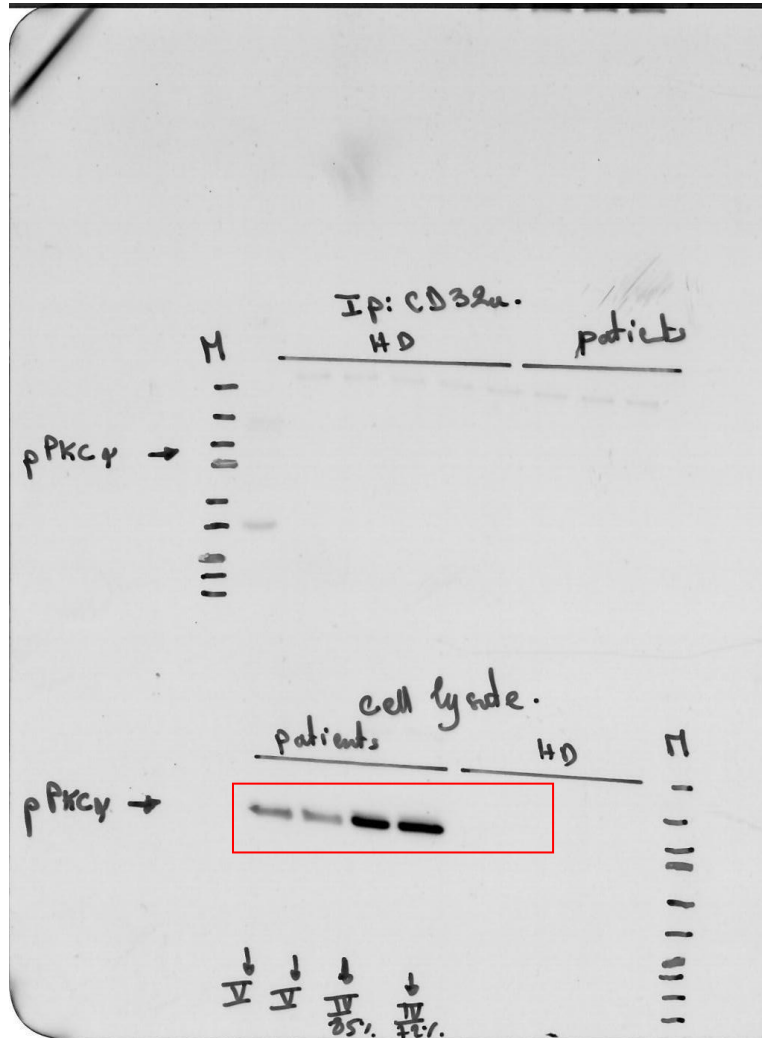

Figure 7a

IB: pSHP-1<sup>S591</sup>, IP: FcγRIIA

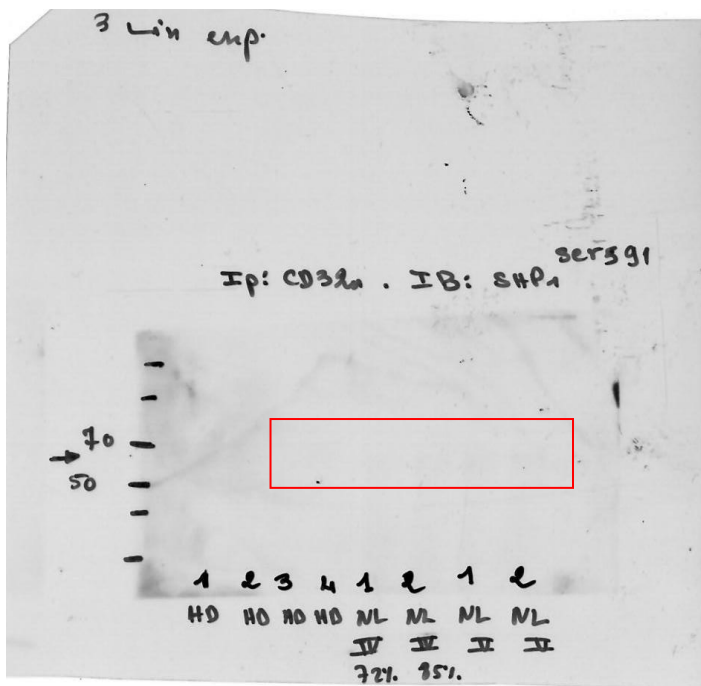

# Figure 7a

IB: Fyn, IP: FcγRIIA

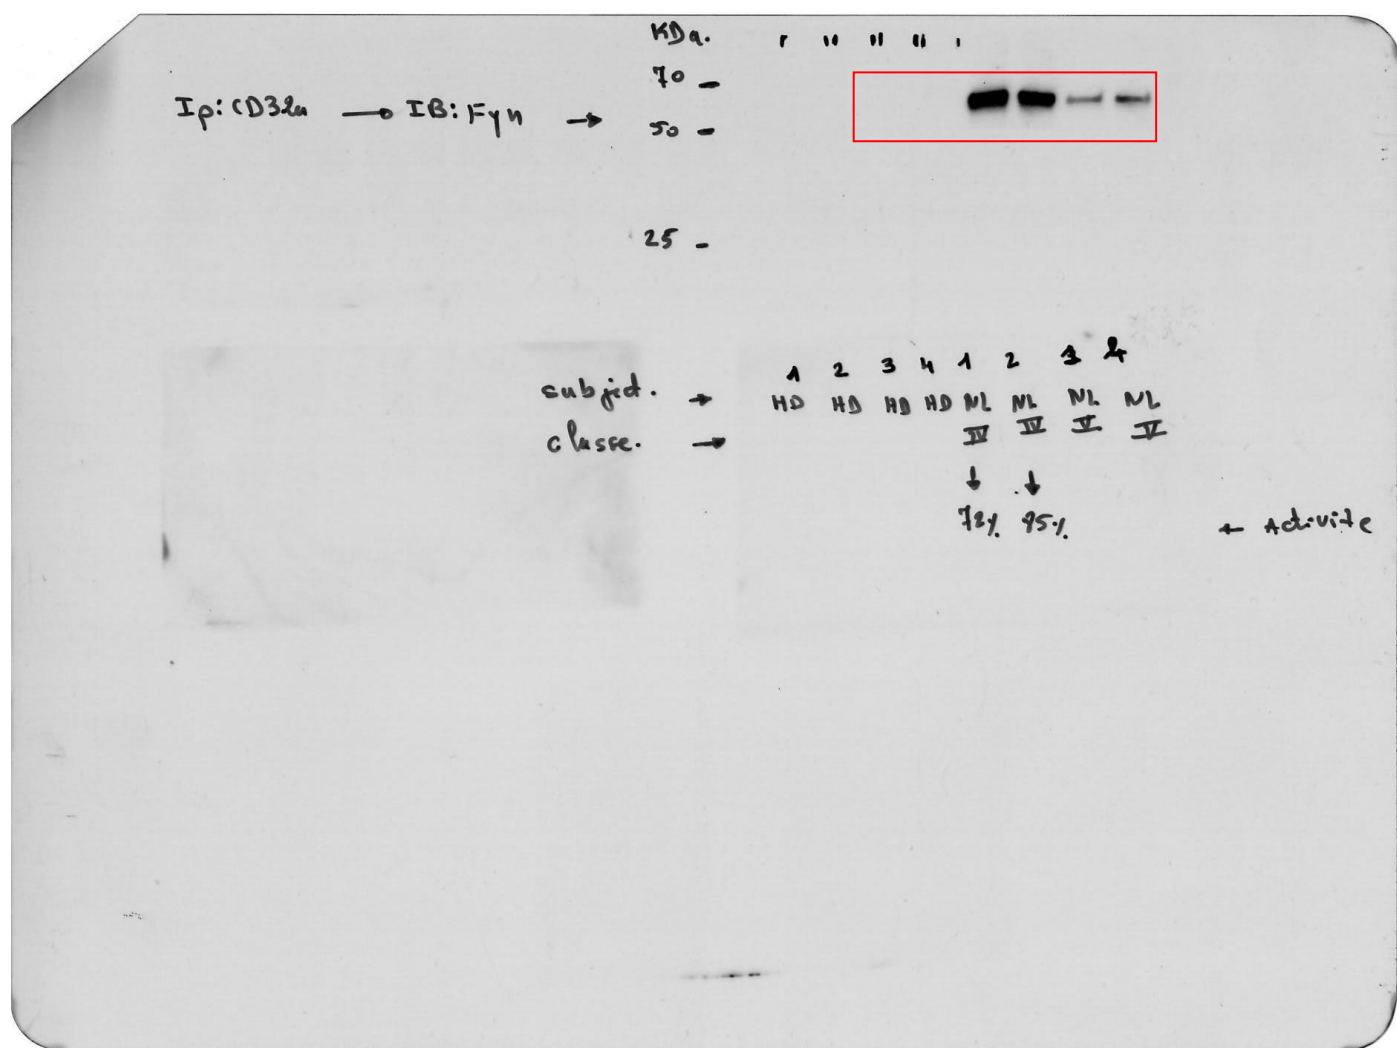

Figure 7a

IB: pSHP-1<sup>Y536</sup>, IP: FcγRIIA

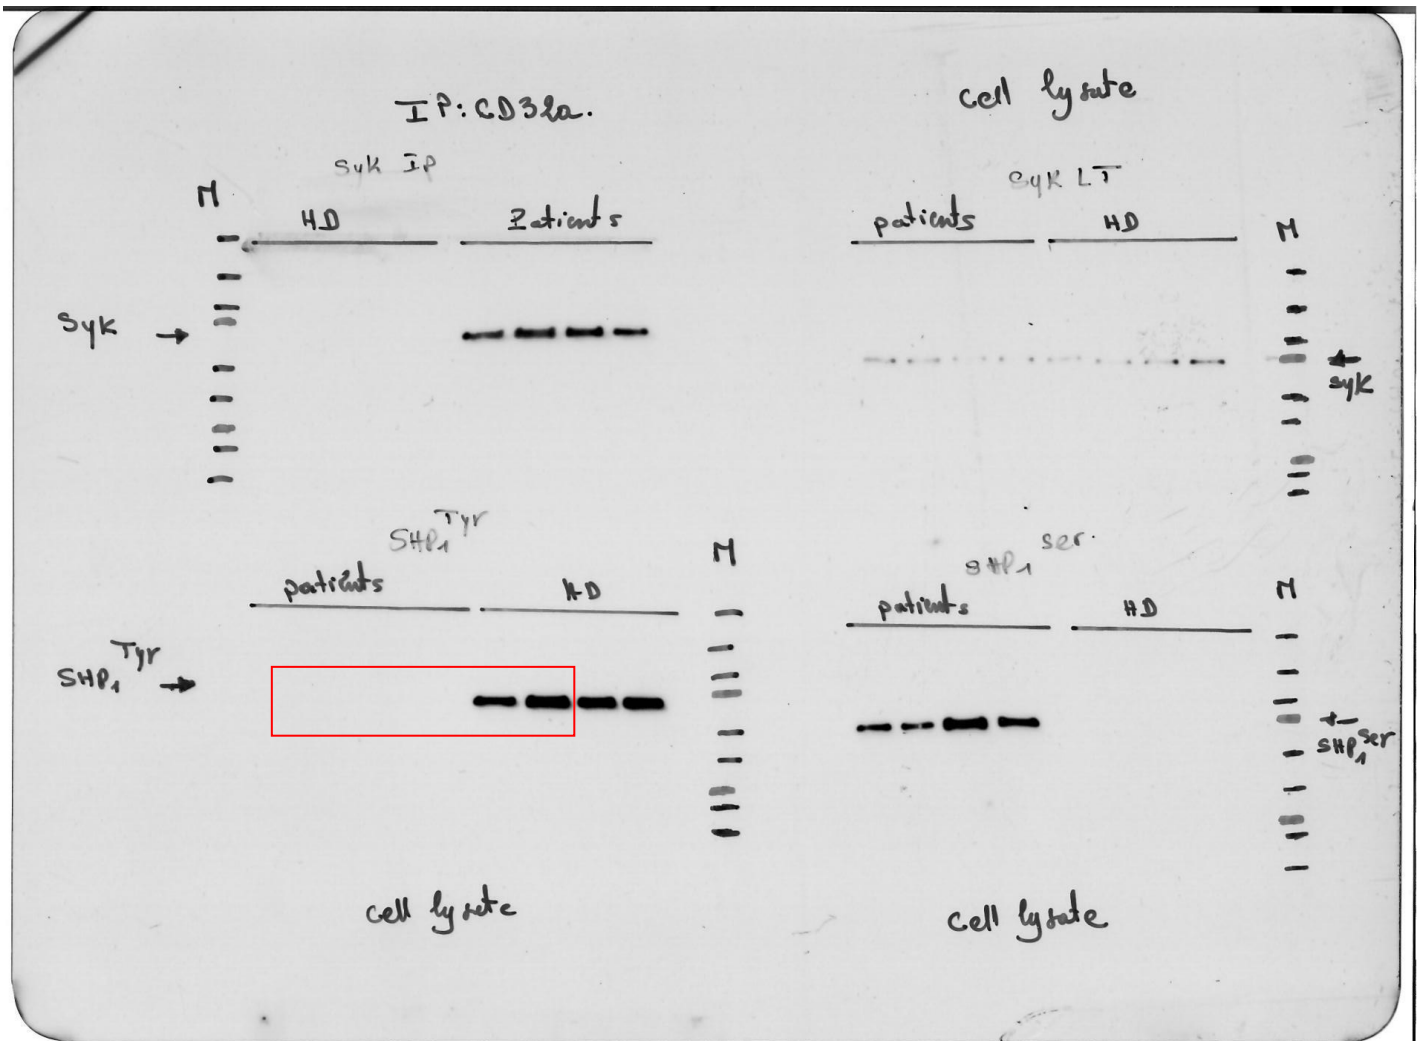



Figure 7a  
IB: pSHP-1<sup>S591</sup>, Lysate

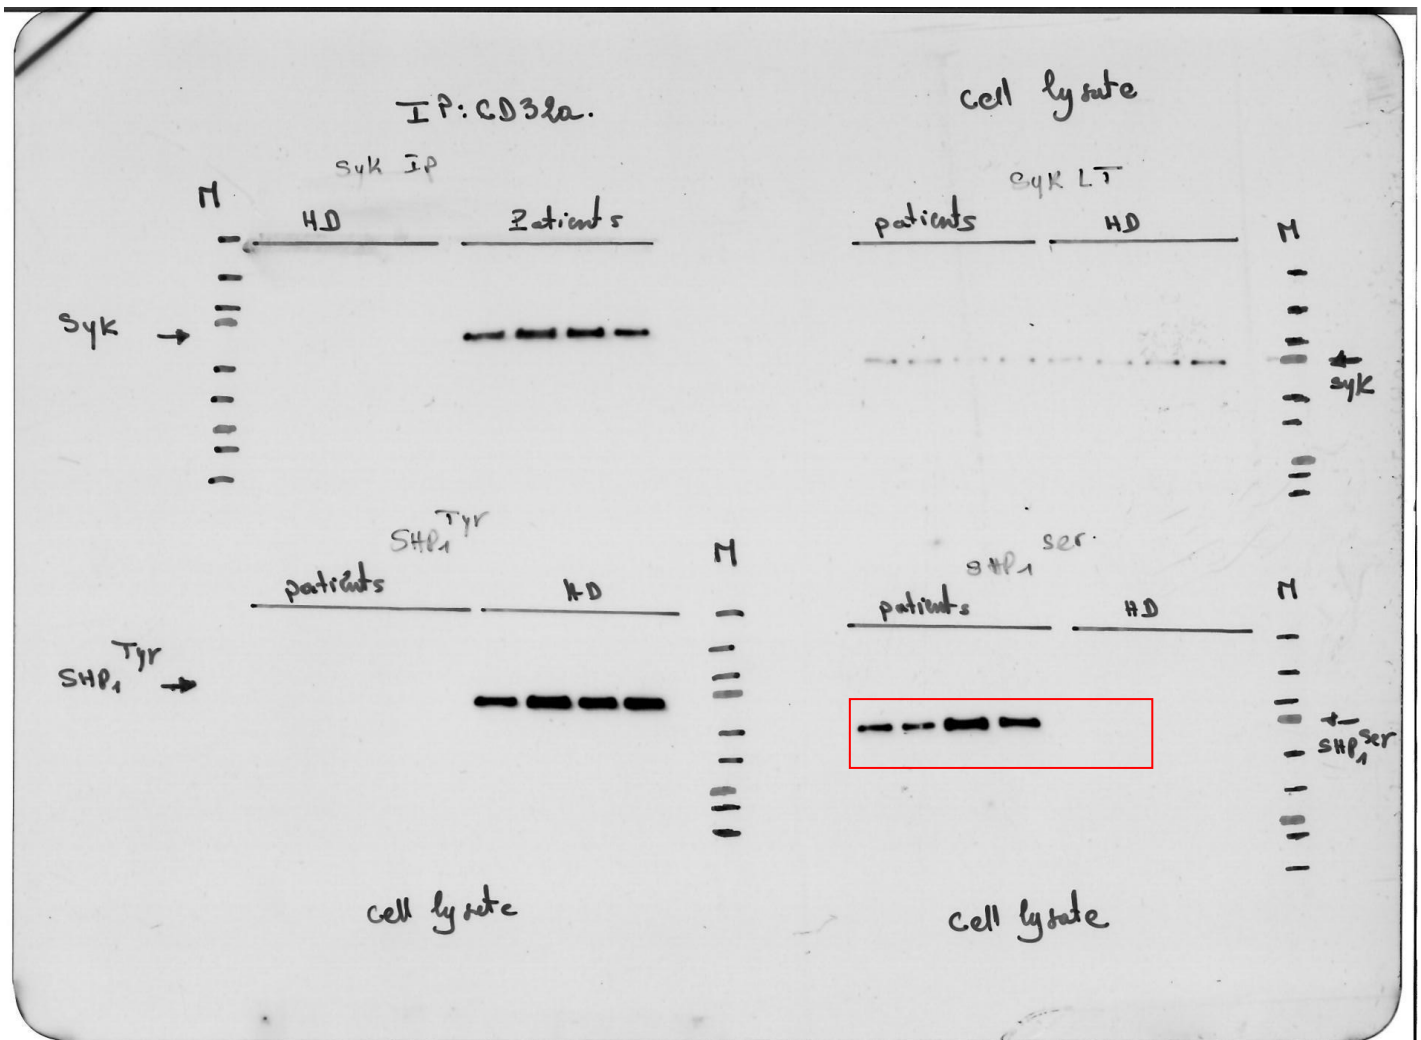

Figure 7a  
IB: Syk, Lysate

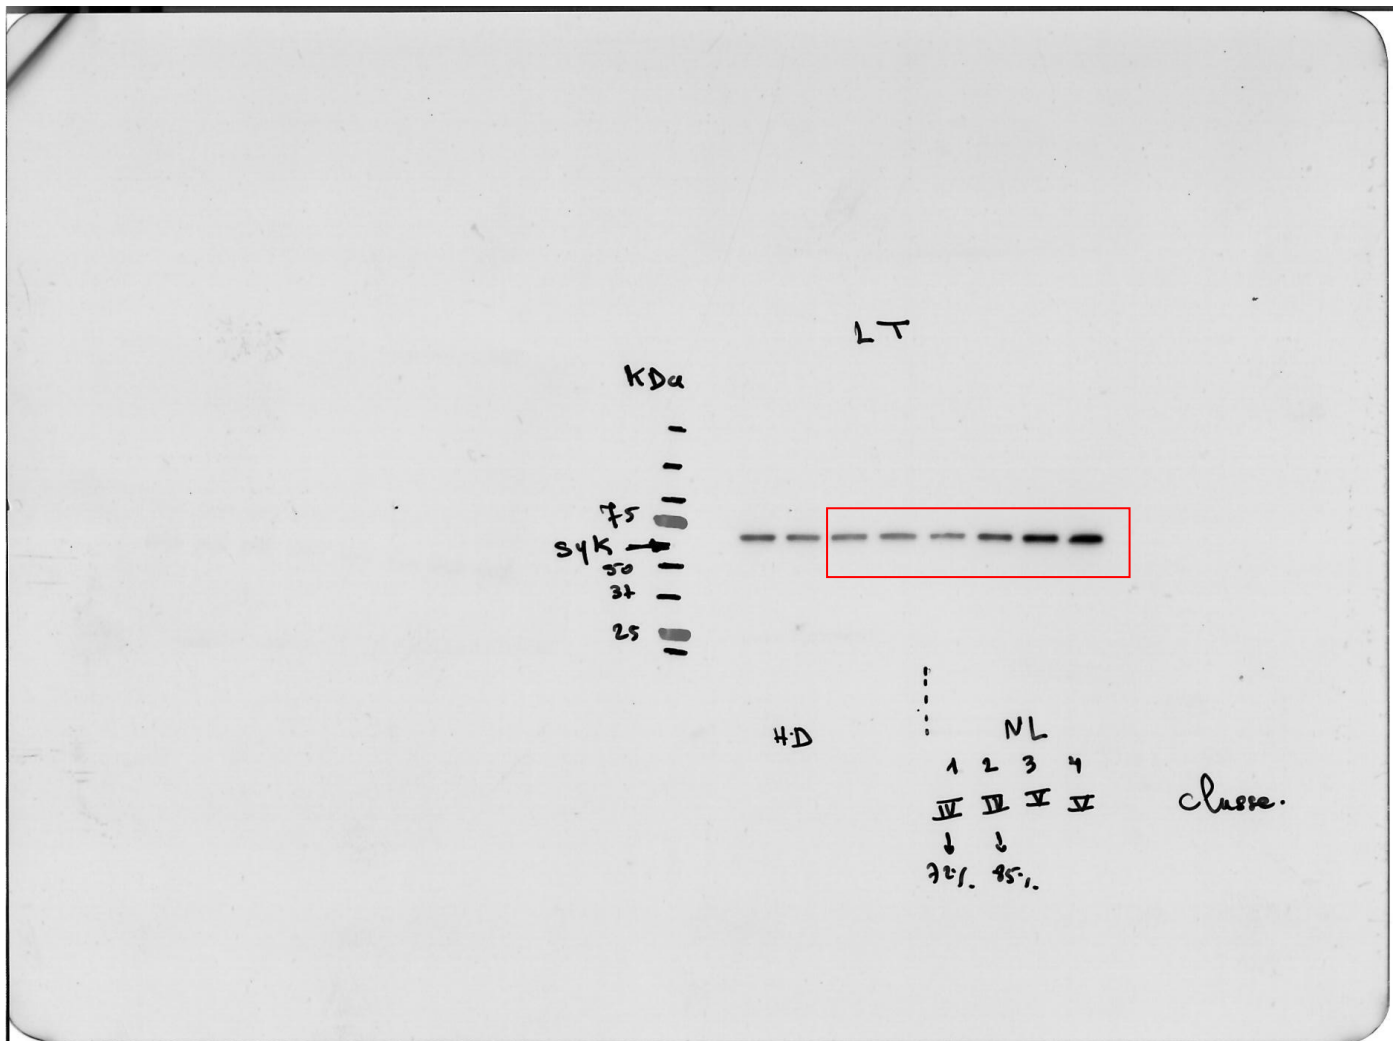

Figure 7a

IB: FcγRIIA, IP: FcγRIIA

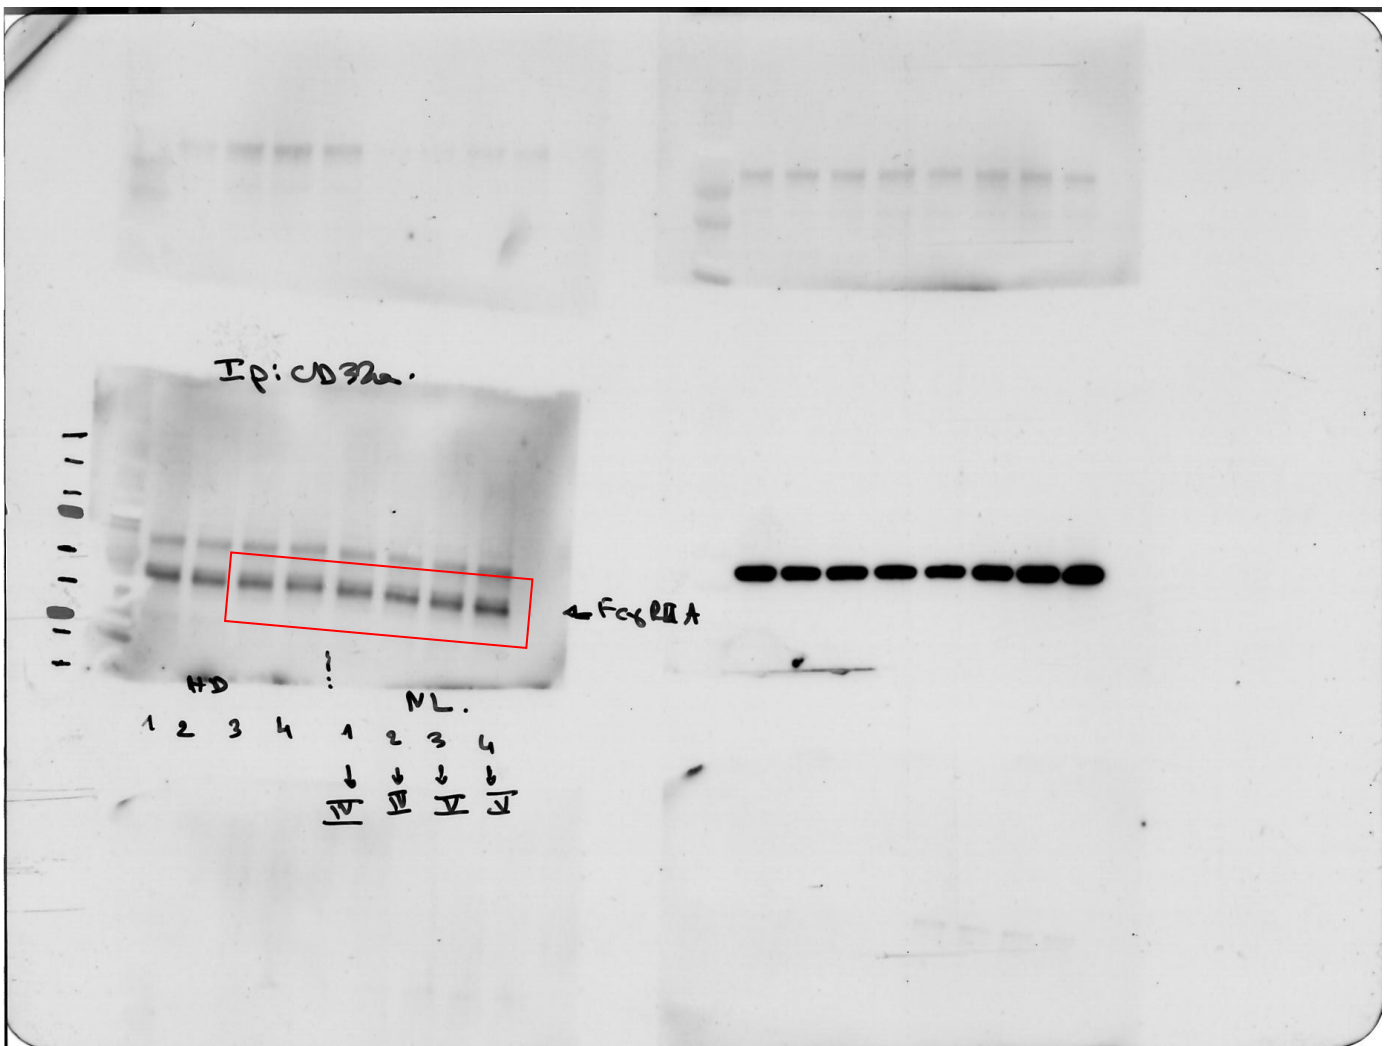

Figure 7a  
IB: Lyn, Lysate

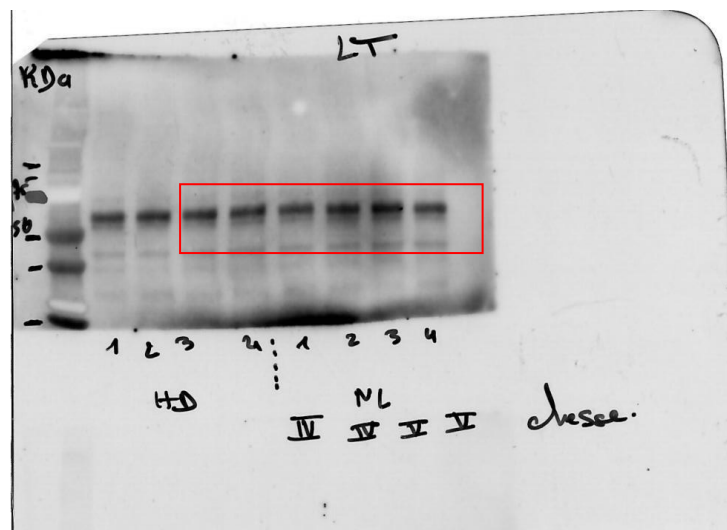

Figure 7a

IB: Lyn, IP: FcγRIIA

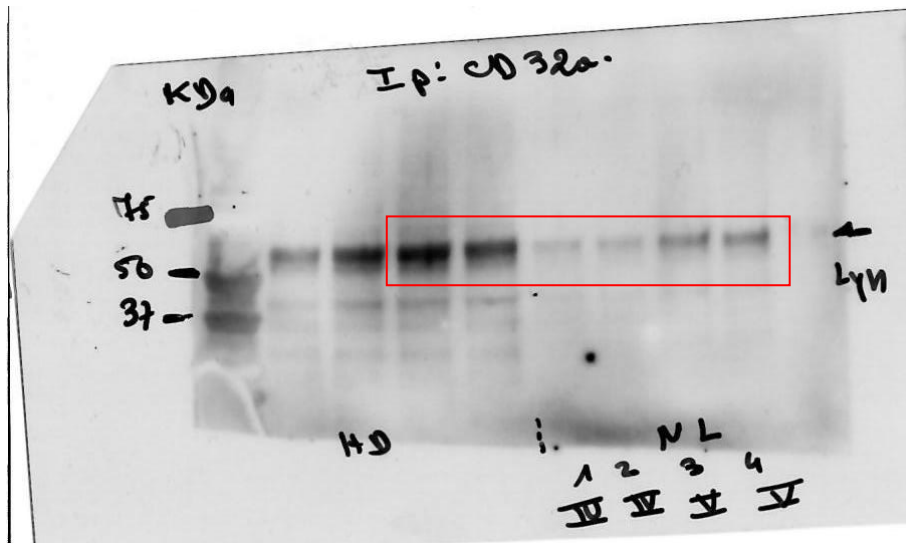

Figure 7a

IB: SHP-1, IP: FcγRIIA

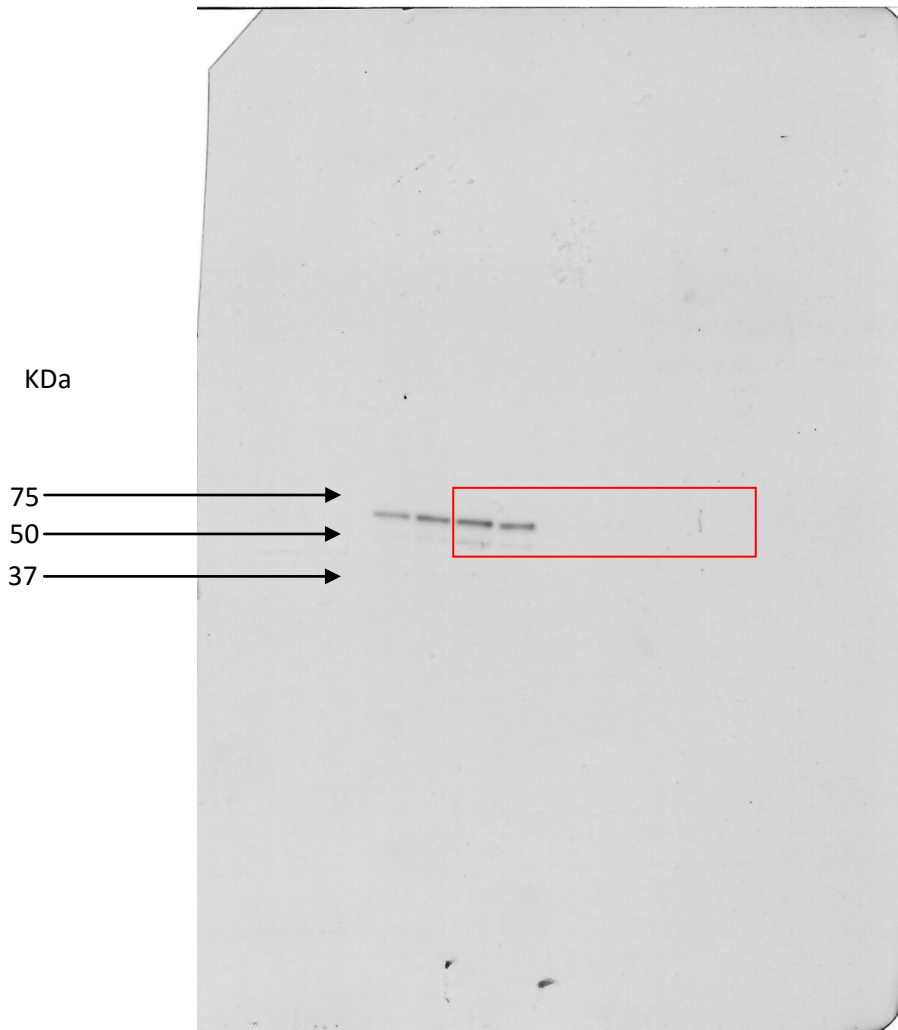

Figure 7a

IB: pSHP-1<sup>Y536</sup>, Lysate

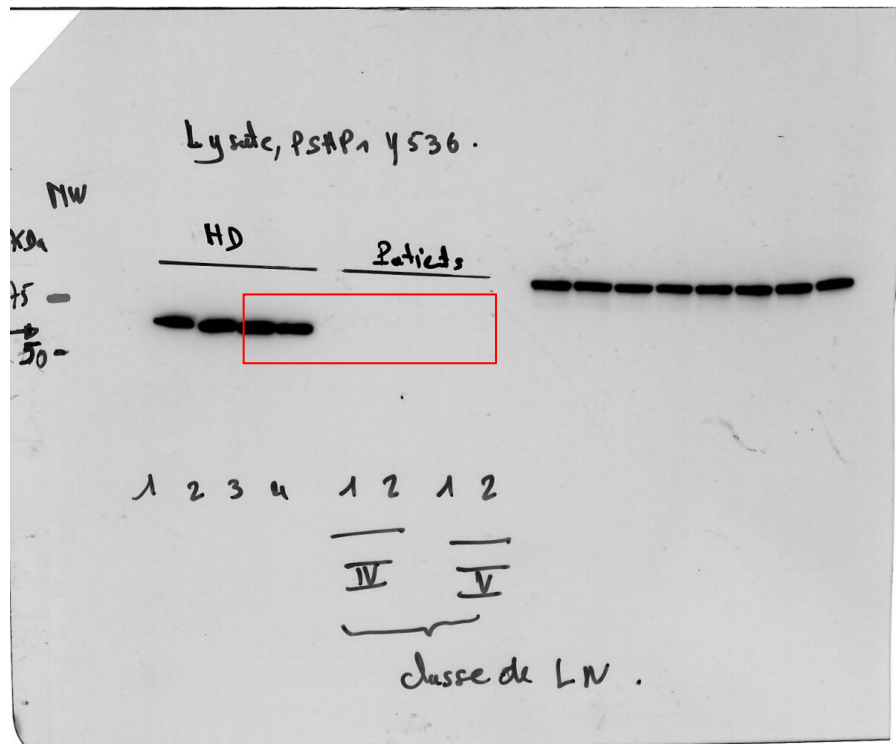

Figure 7a

IB: FcγRIIA, Lysate

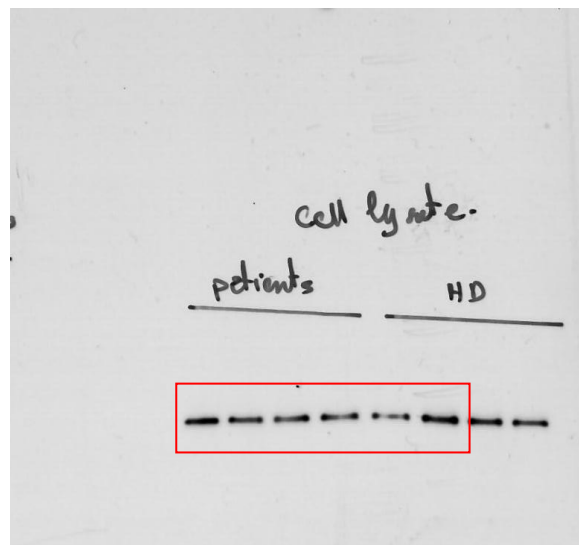



Figure 7a  
IB: SHP-1, Lysate

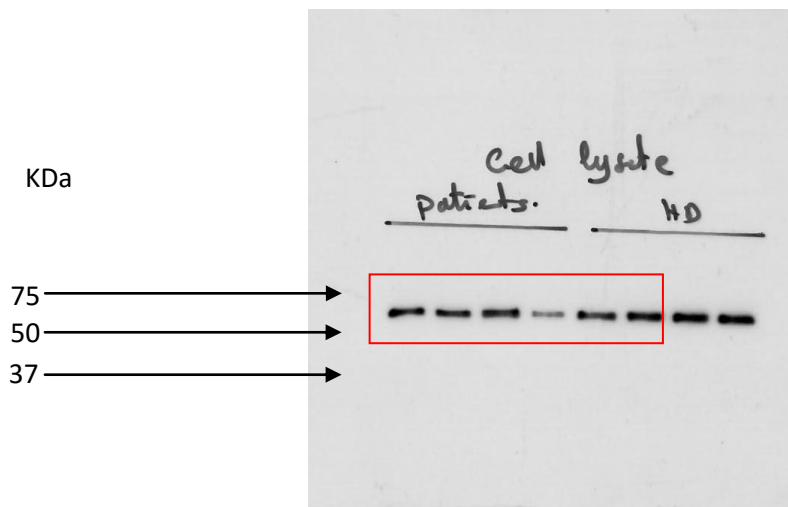

Supplementary Figure 1a  
Lysate, IB: Fyn (control siRNA)

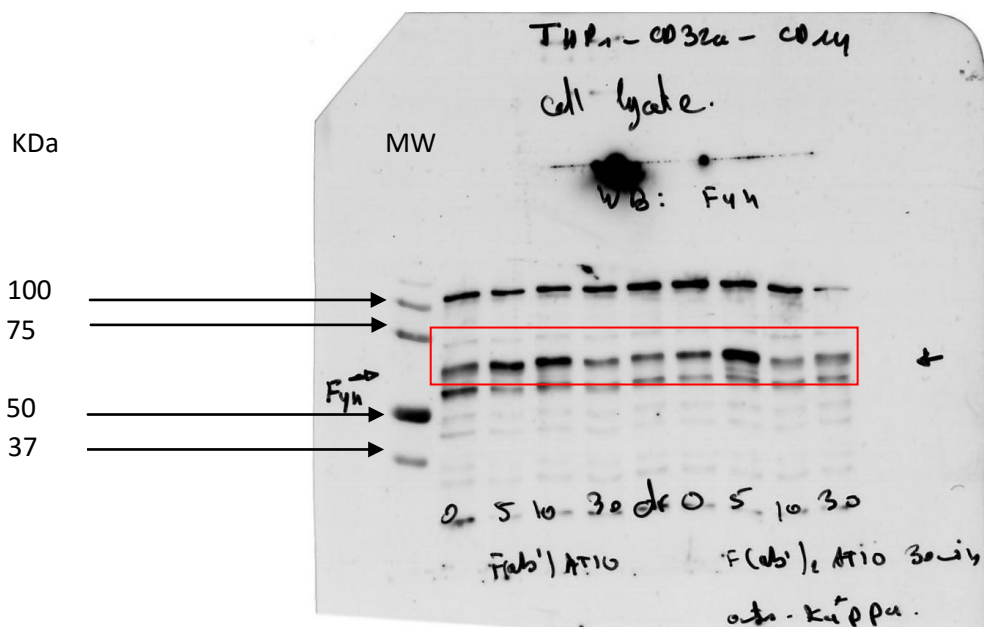

Supplementary Figure 1a  
Lysate, IB: Lyn (control siRNA)

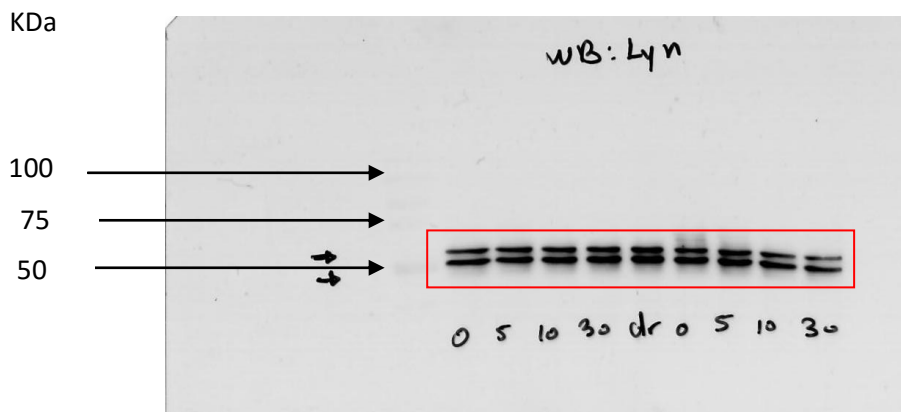

Supplementary Figure 1a  
Lysate, IB: Syk (control siRNA)

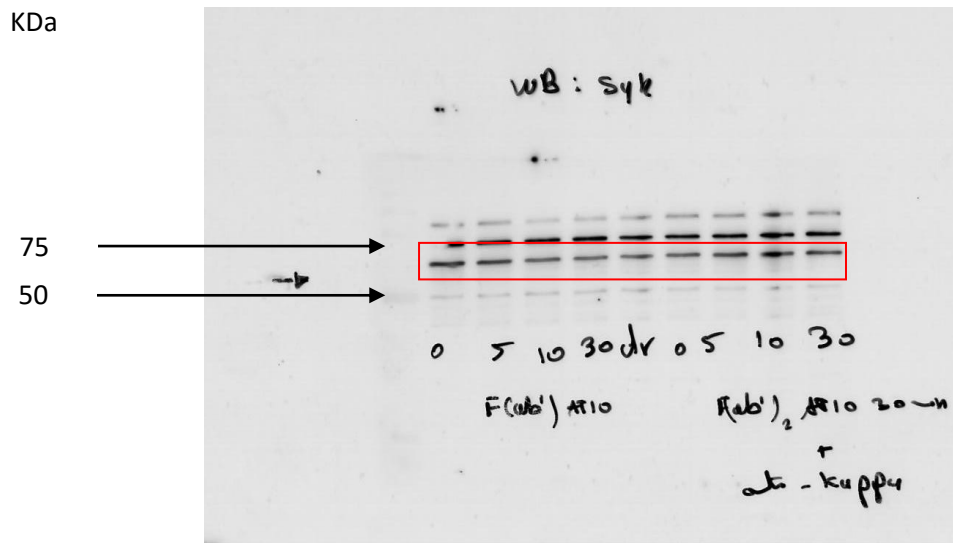

Supplementary Figure 1a  
Lysate, IB: SHP-1 (control siRNA)

KDa

75

50

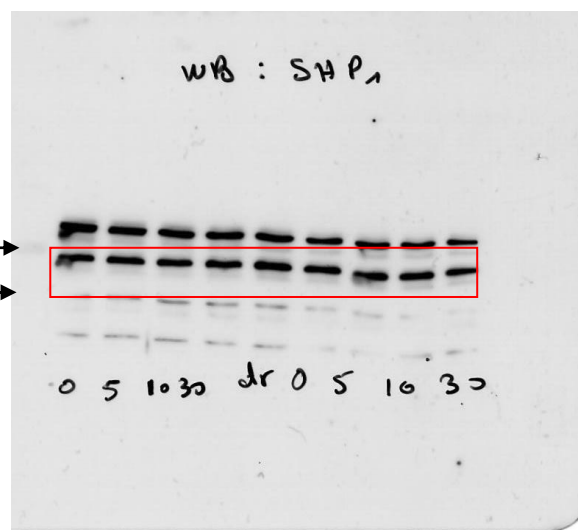

Supplementary Figure 1a  
Lysate, IB: Lyn (Fyn siRNA)

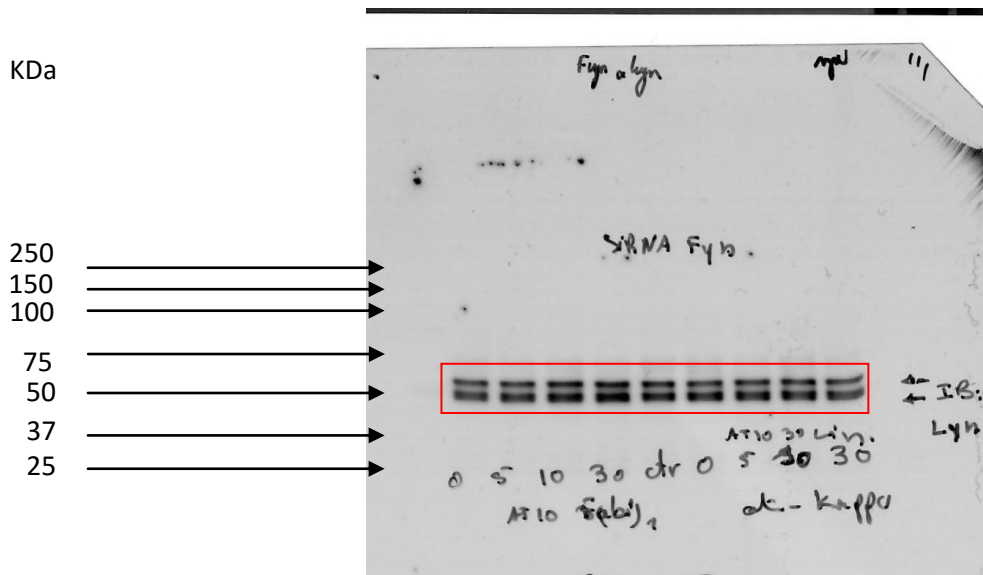

Supplementary Figure 1a  
Lysate, IB: Fyn (Lyn siRNA)

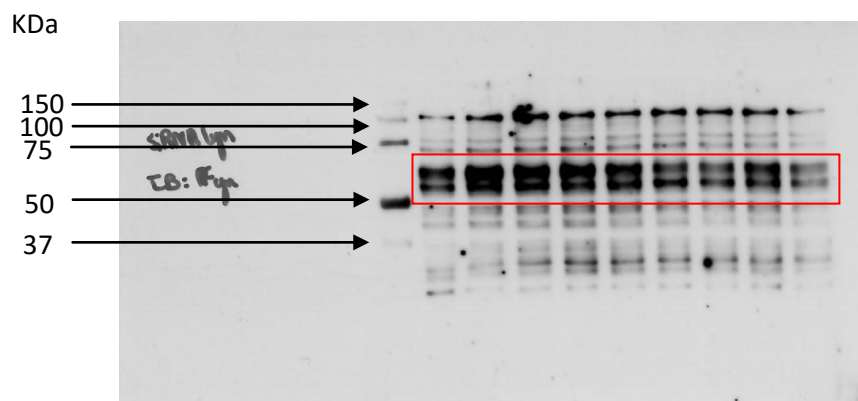

Supplementary Figure 1a  
Lysate, IB: Fyn (Fyn siRNA)

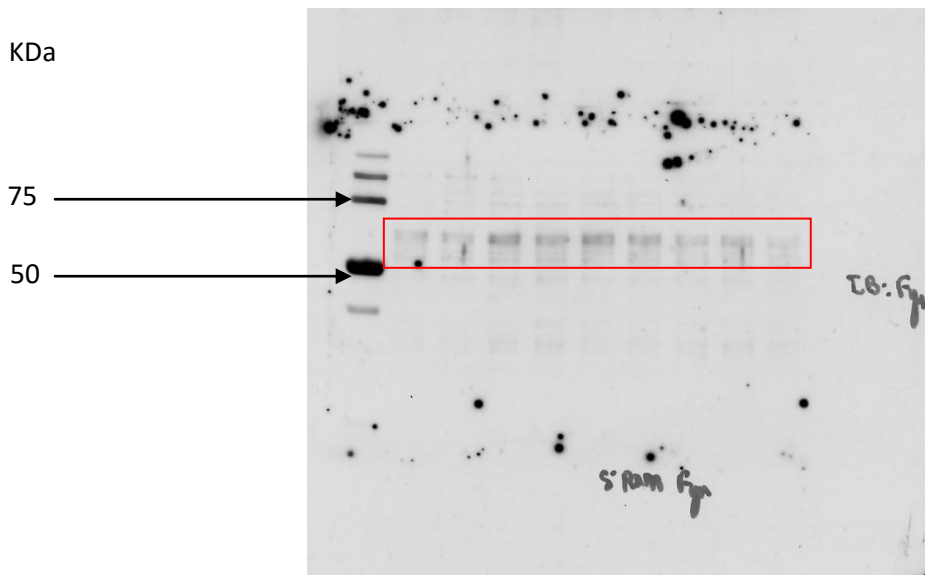



Supplementary Figure 1a  
Lysate, IB: Lyn (Lyn siRNA)

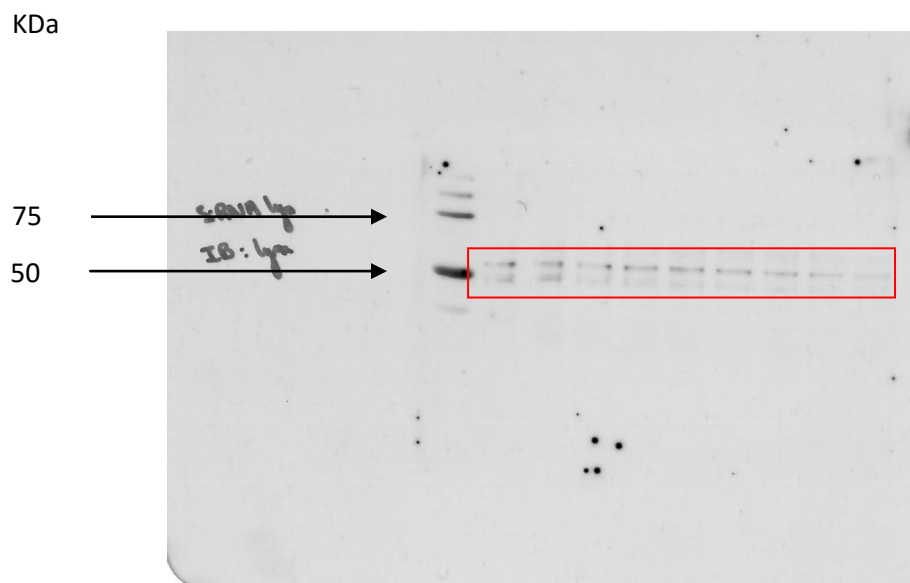

Supplementary Figure 1a  
Lysate, IB: SHP-1 (Lyn siRNA)

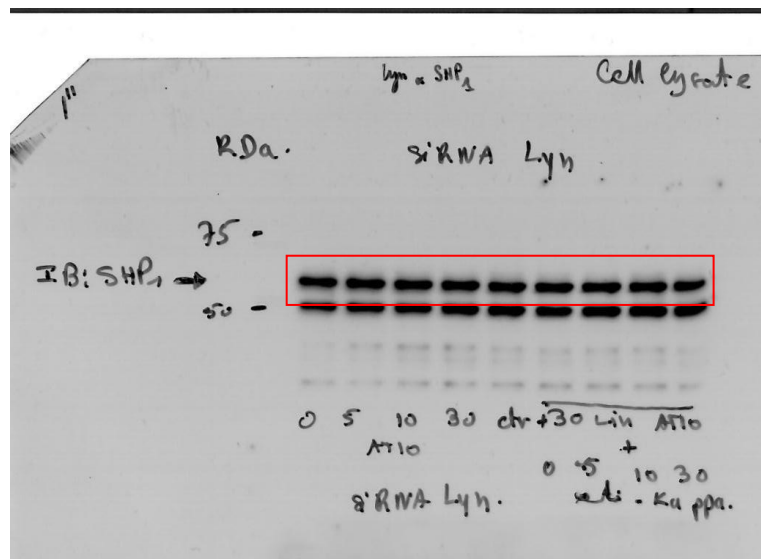

Supplementary Figure 1a  
Lysate, IB: SHP-1 (Fyn siRNA)

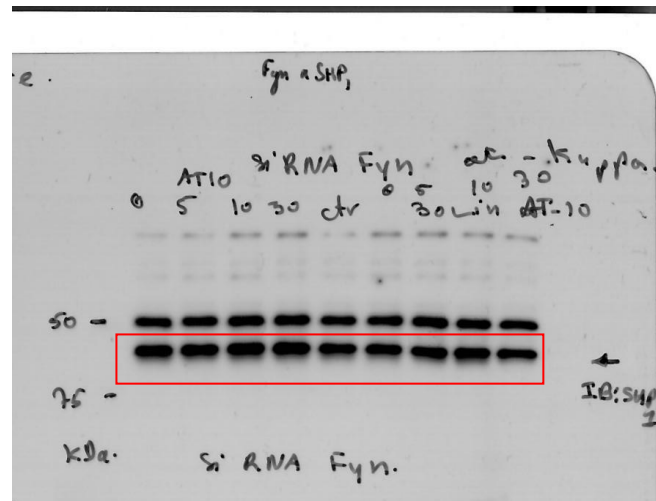

Supplementary Figure 1a  
Lysate, IB: Syk (Lyn siRNA)

KDa

75

50

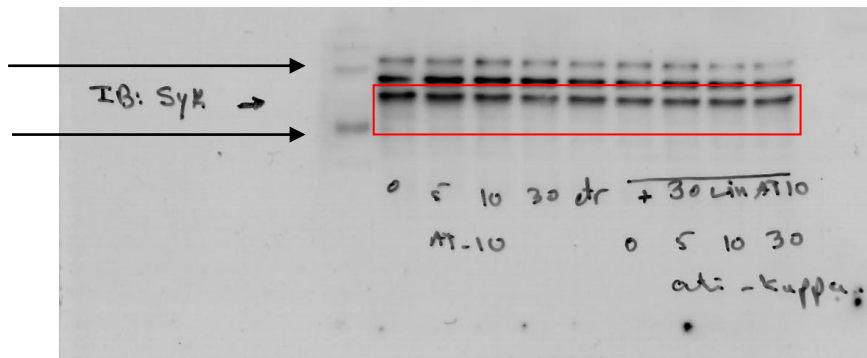

# Supplementary Figure 1a

## Lysate, IB: Syk (Fyn siRNA)

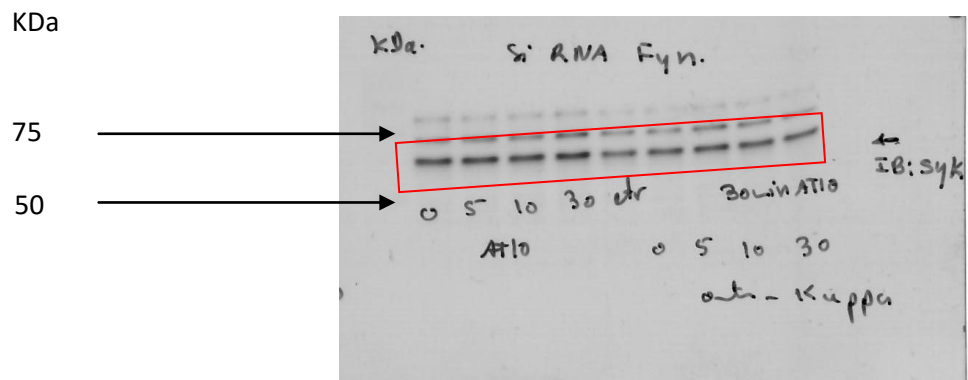

Supplementary Figure 1b  
Lysate, IB: Lyn (Fyn siRNA)

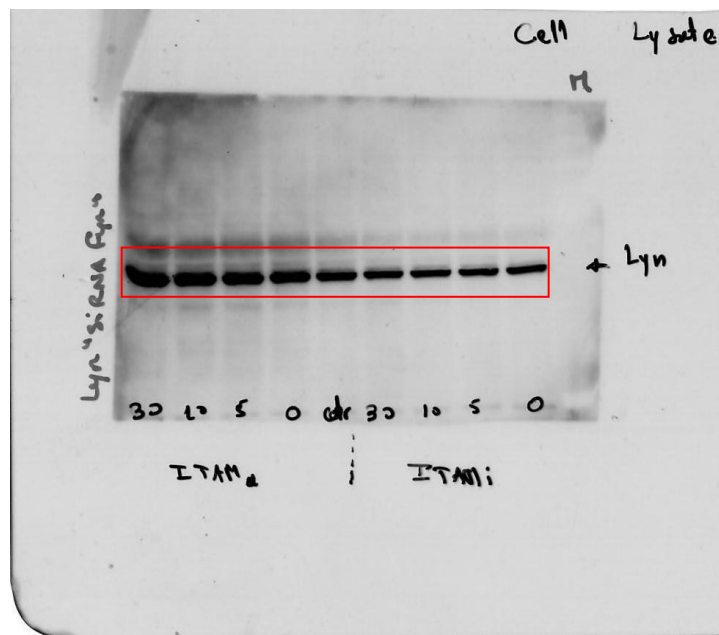

Supplementary Figure 1b  
Lysate, IB: Lyn (Control siRNA)

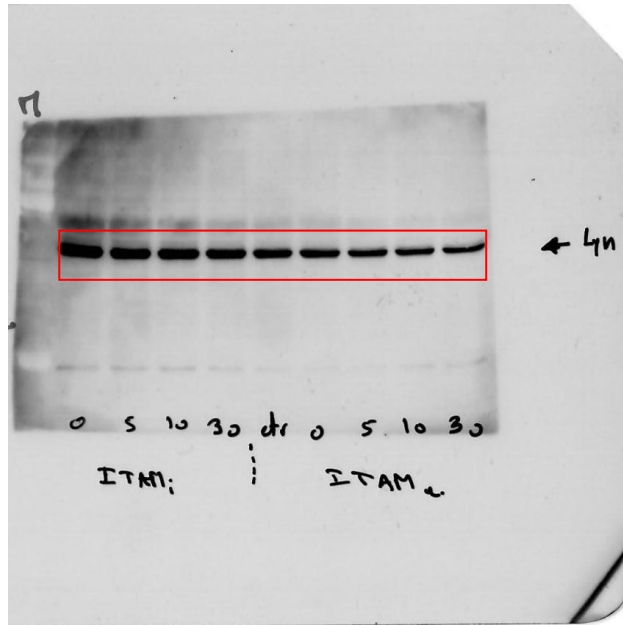

Supplementary Figure 1b  
Lysate, IB: Fyn (Lyn siRNA)

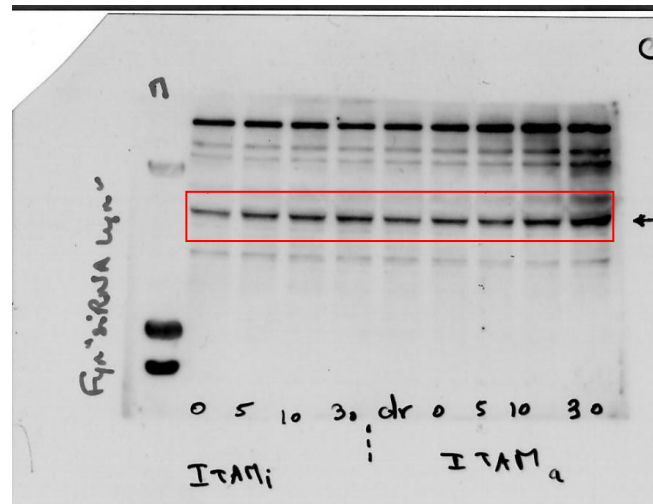



Supplementary Figure 1b  
Lysate, IB: SHP-1 (Control siRNA)

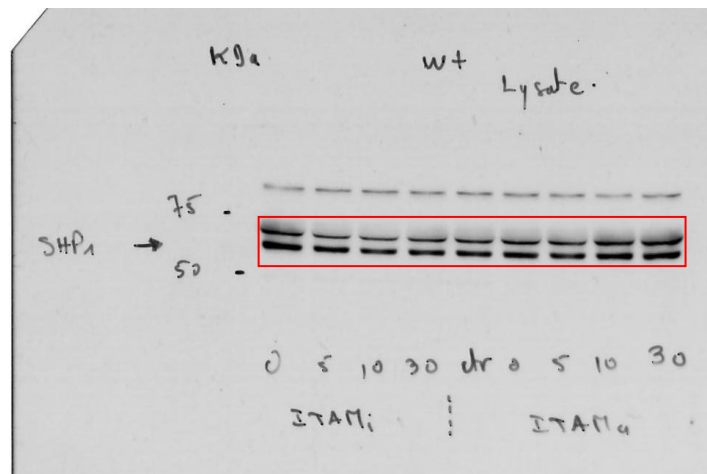

Supplementary Figure 1b  
Lysate, IB: SHP-1 (Fyn siRNA)

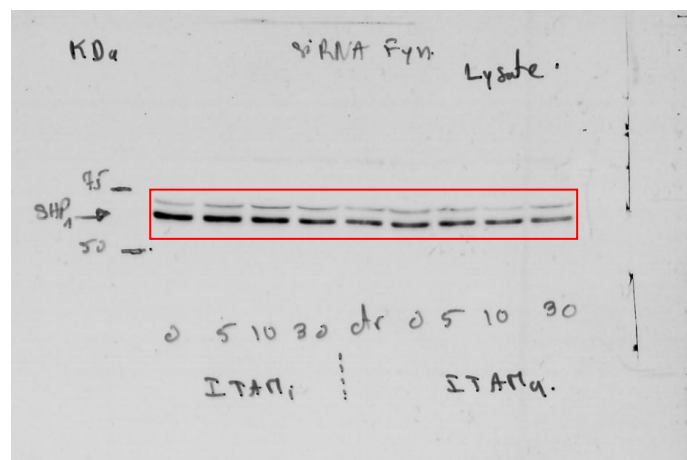

Supplementary Figure 1b  
Lysate, IB: Syk (Control siRNA)

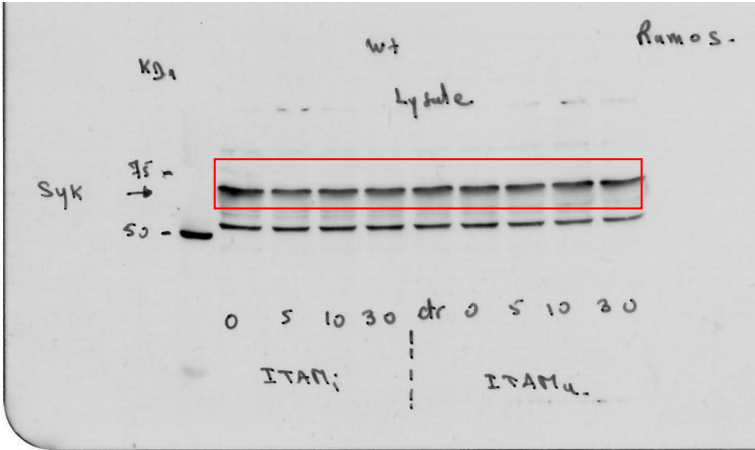

Supplementary Figure 1b  
Lysate, IB: Syk (Fyn siRNA)

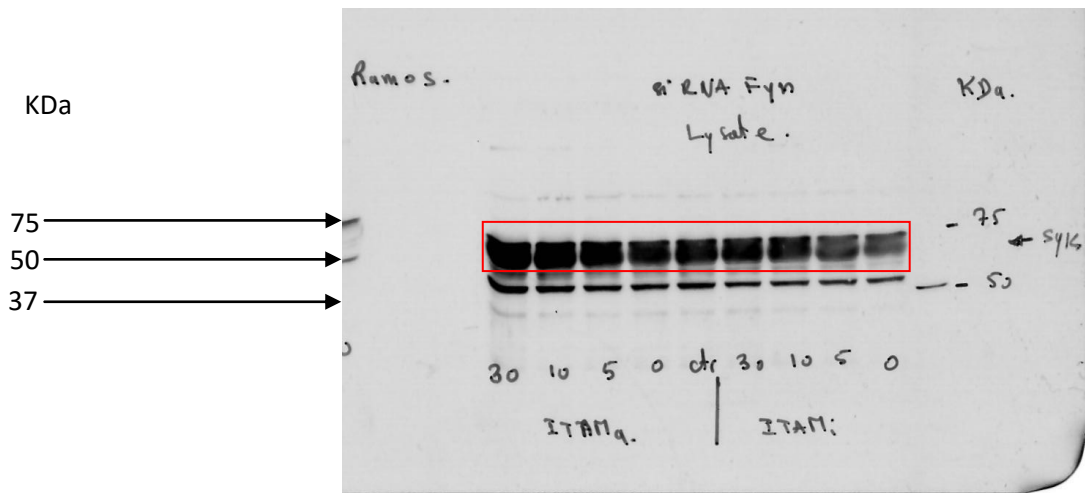

Supplementary Figure 1b  
Lysate, IB: Syk (Lyn siRNA)

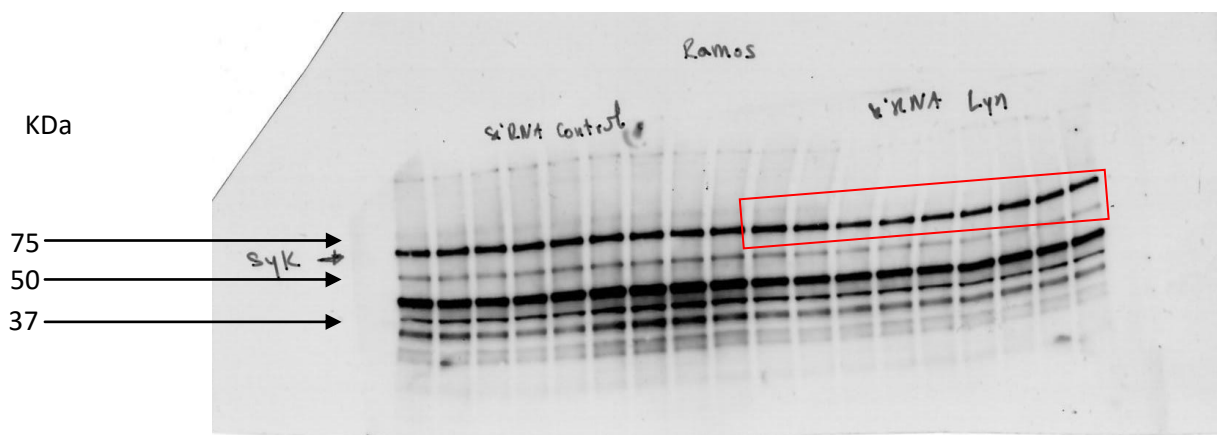

# Supplementary Figure 1b

## Lysate, IB: Fyn (Control siRNA)

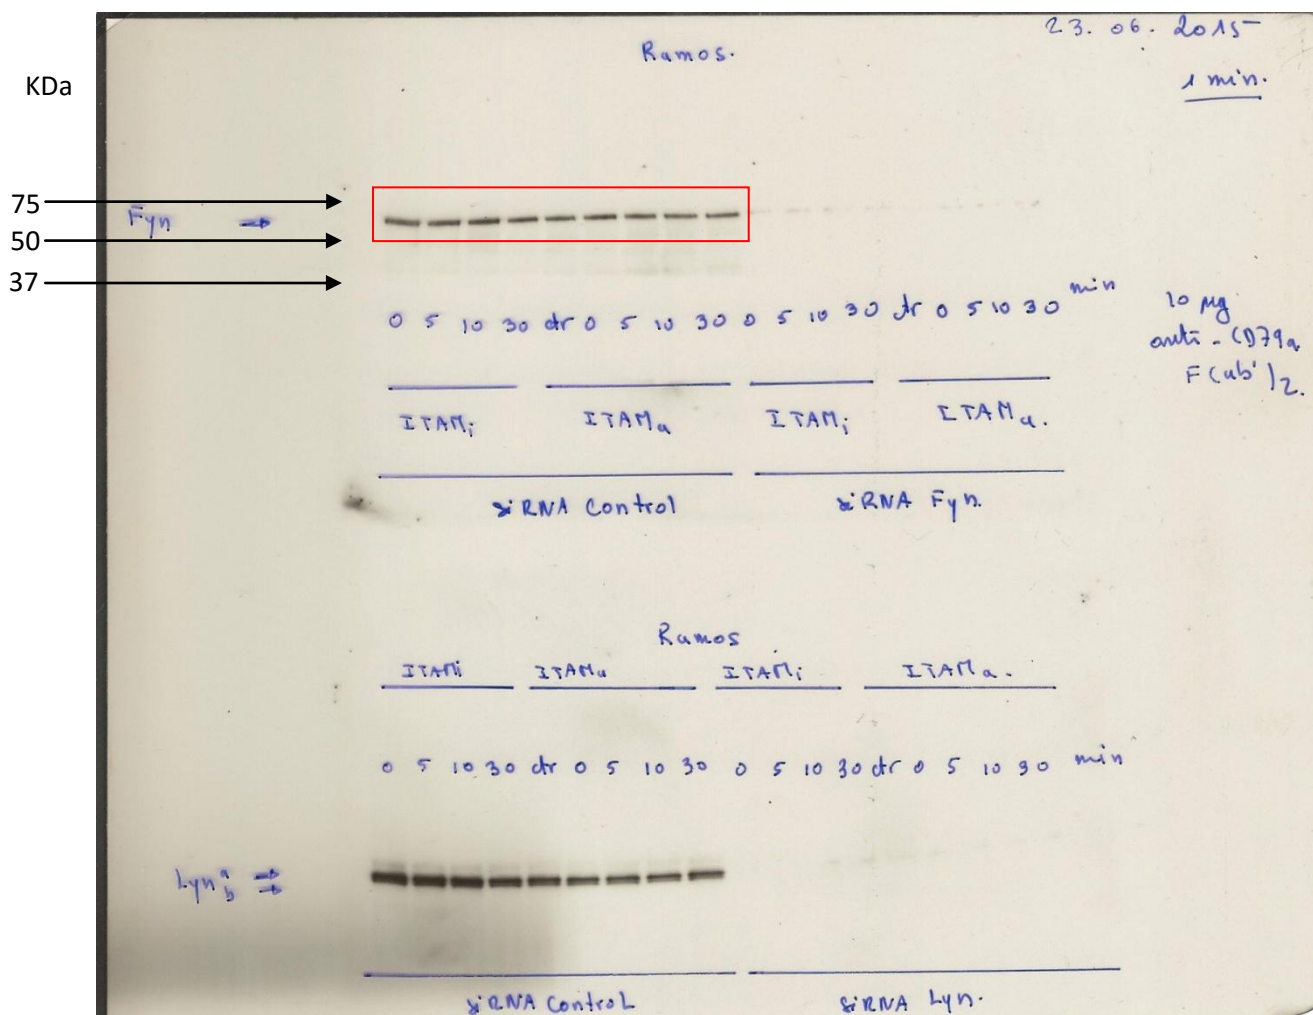

Supplementary Figure 1b

Lysate, IB: Fyn (Fyn siRNA)

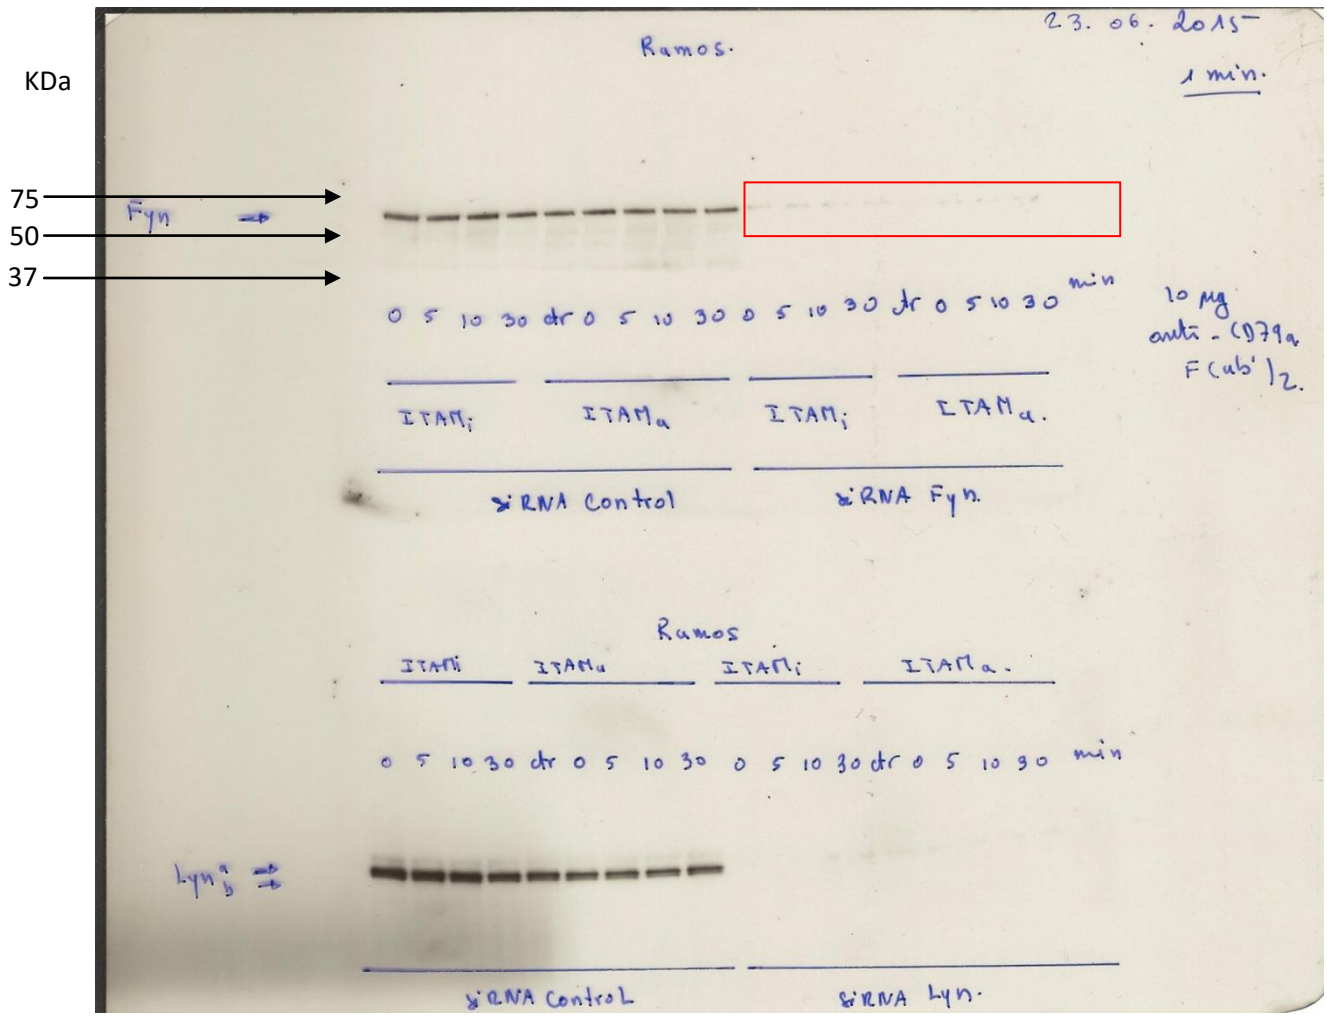

Supplementary Figure 1b  
Lysate, IB: Lyn (Lyn siRNA)

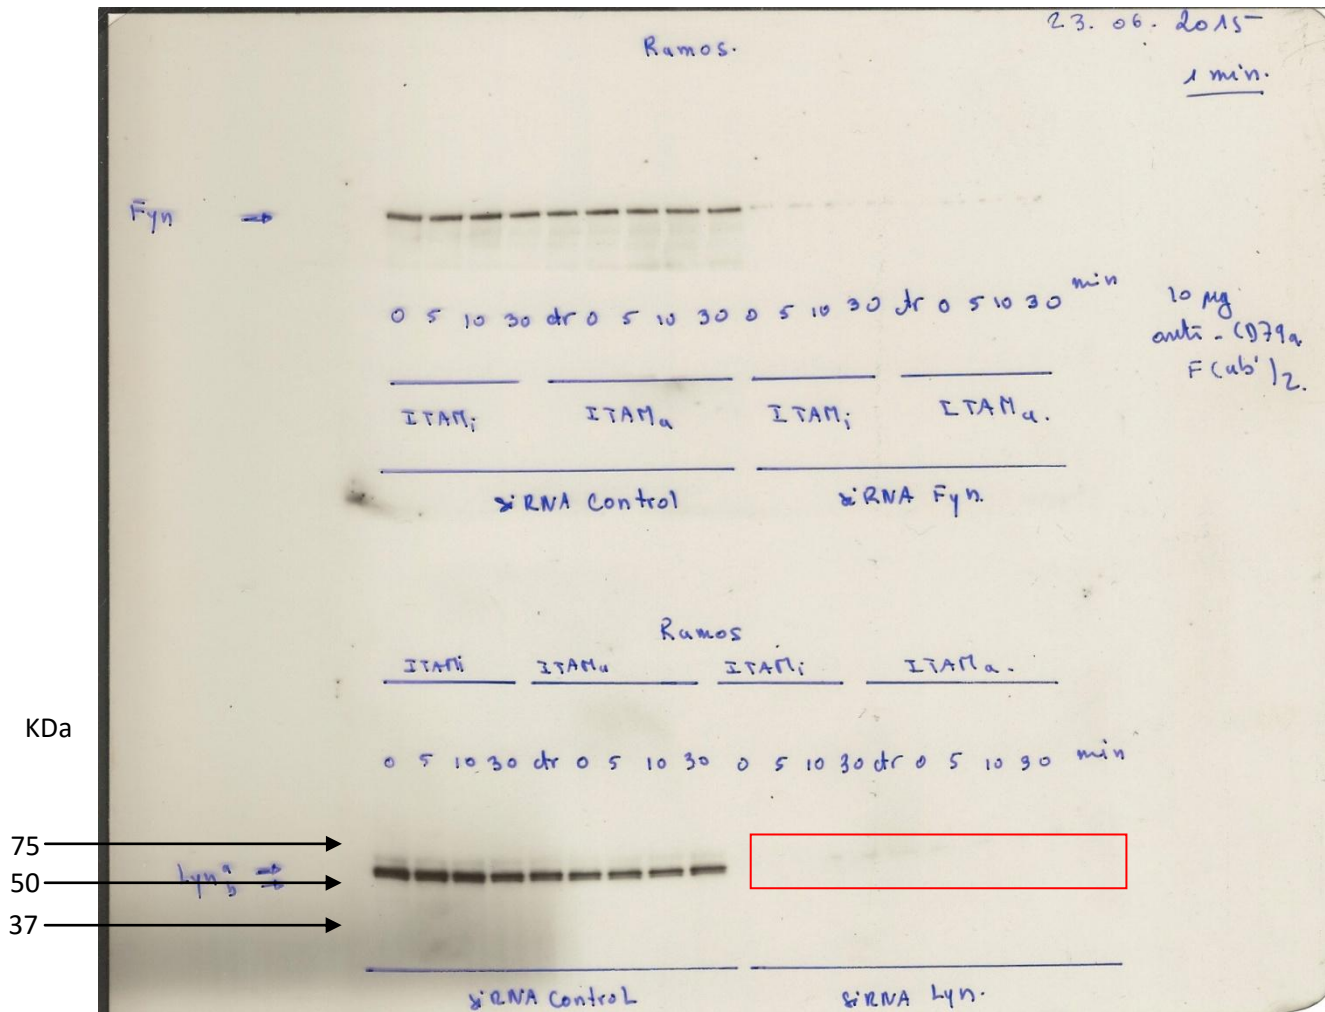



Supplementary Figure 1b  
Lysate, IB: SHP-1 (Lyn siRNA)

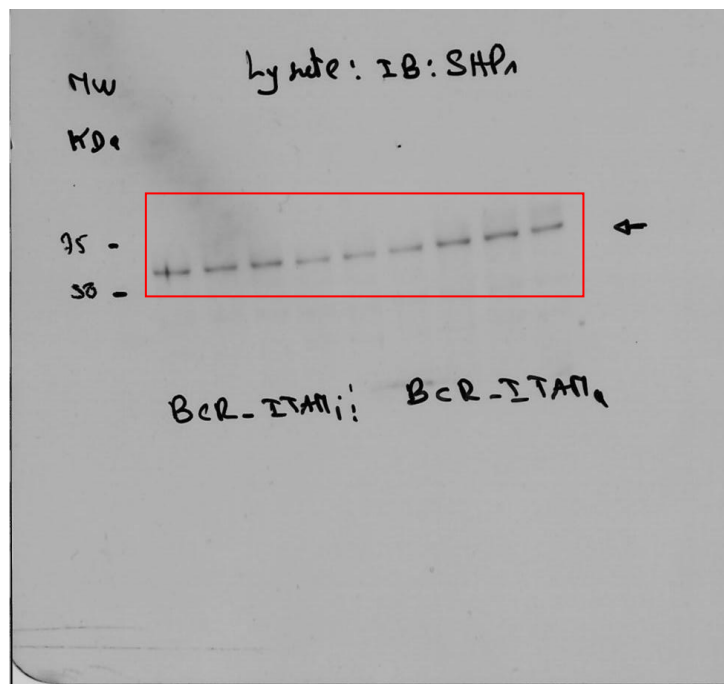

Supplementary Figure 2a  
Lysate, IB: Lyn (control siRNA)

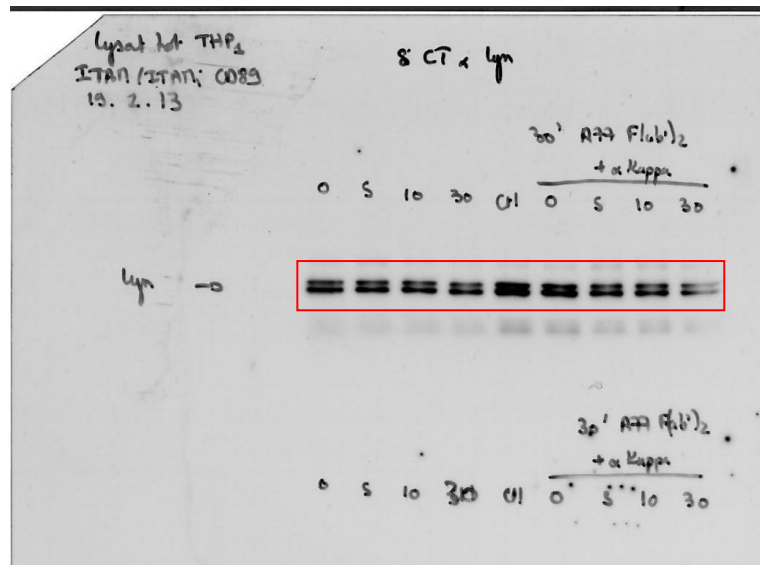

Supplementary Figure 2a  
Lysate, IB: Lyn (Fyn siRNA)

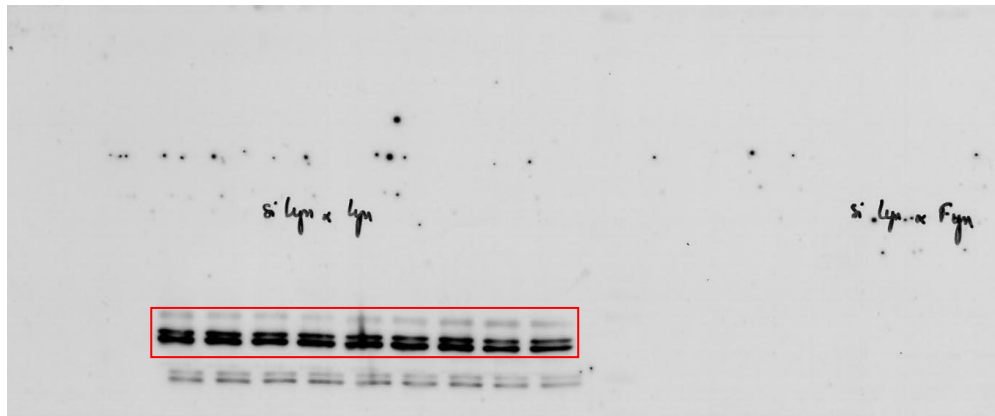

Supplementary Figure 2a  
Lysate, IB: Fyn (Control siRNA)

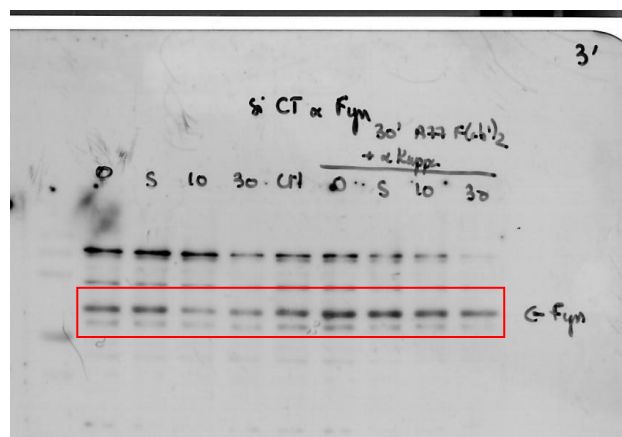

Supplementary Figure 2a  
Lysate, IB: Fyn (Lyn siRNA)

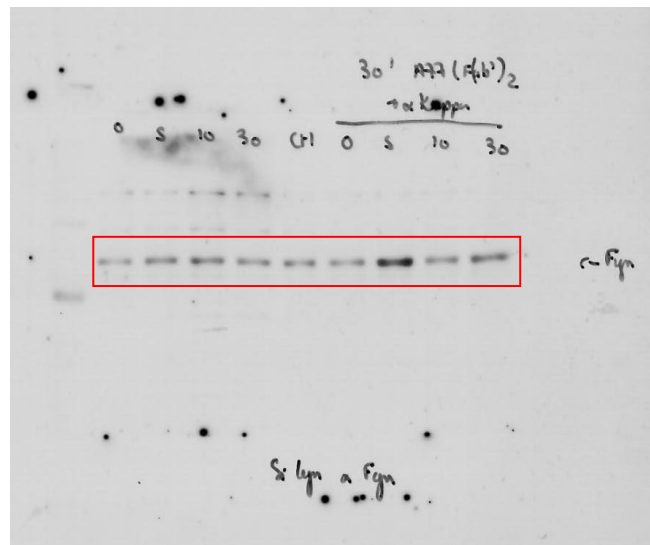

Supplementary Figure 2a  
Lysate, IB: Lyn (Lyn siRNA)

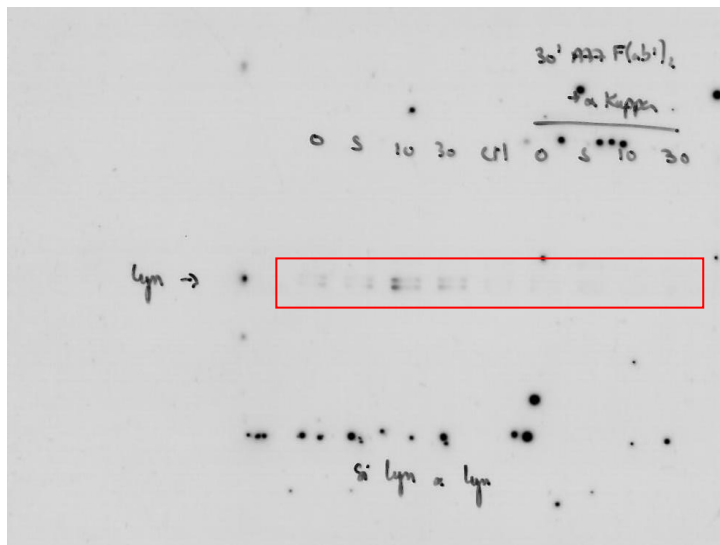

# Supplementary Figure 2a

Lysate, IB: SHP1 (control siRNA)

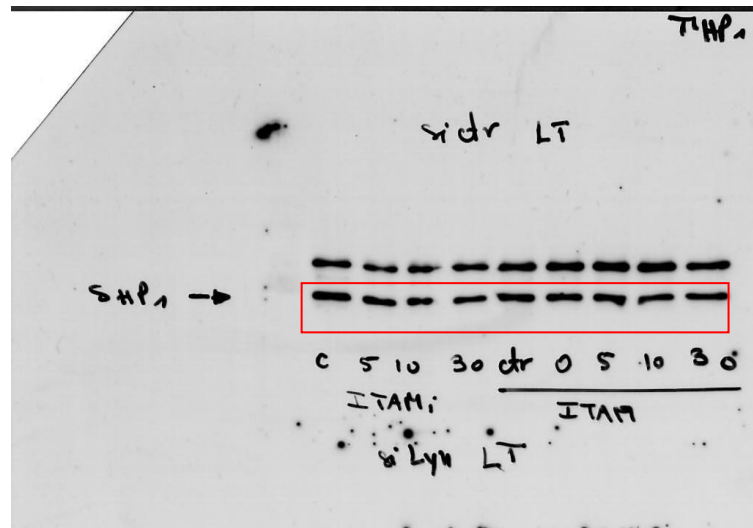

Supplementary Figure 2a  
Lysate, IB: SHP1 (Lyn siRNA)

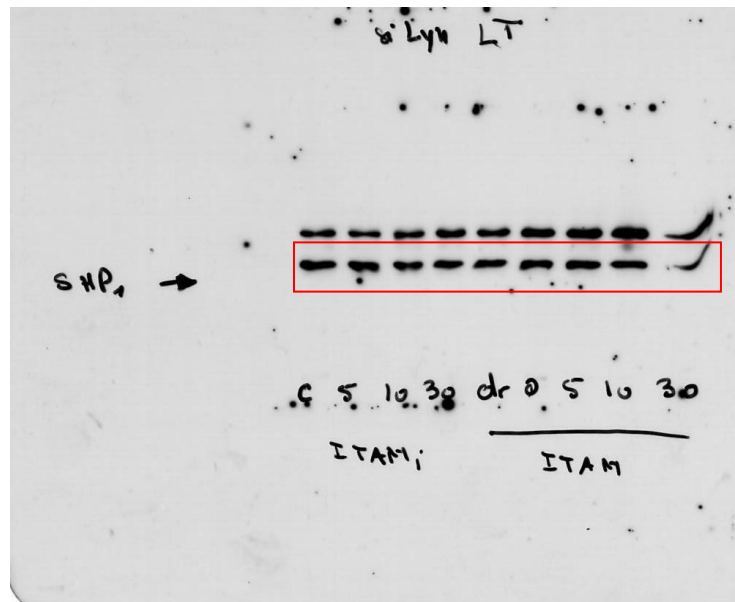



Supplementary Figure 2a  
Lysate, IB: SHP1 (Fyn siRNA)

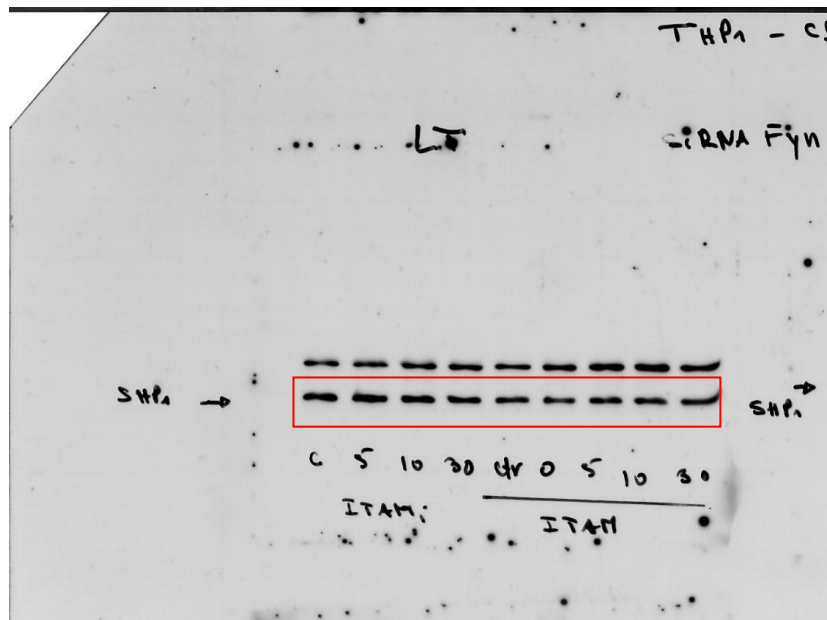

Supplementary Figure 2a  
IP: Fc $\alpha$ RI, IB: Syk (Fyn siRNA)

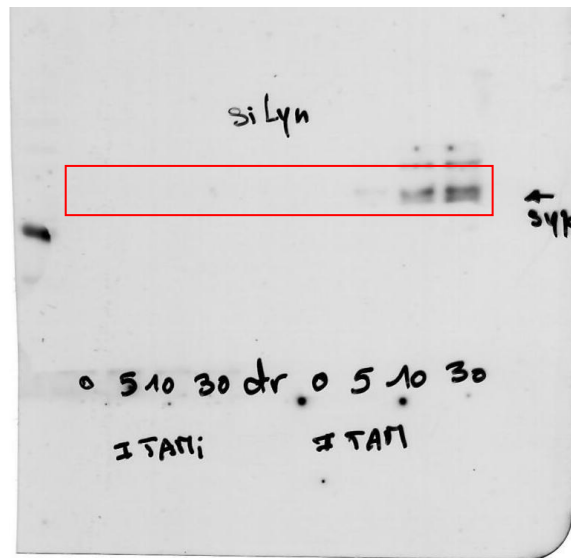

# Supplementary Figure 2a

IP: Fc $\alpha$ RI, IB: SHP1 (Fyn siRNA)

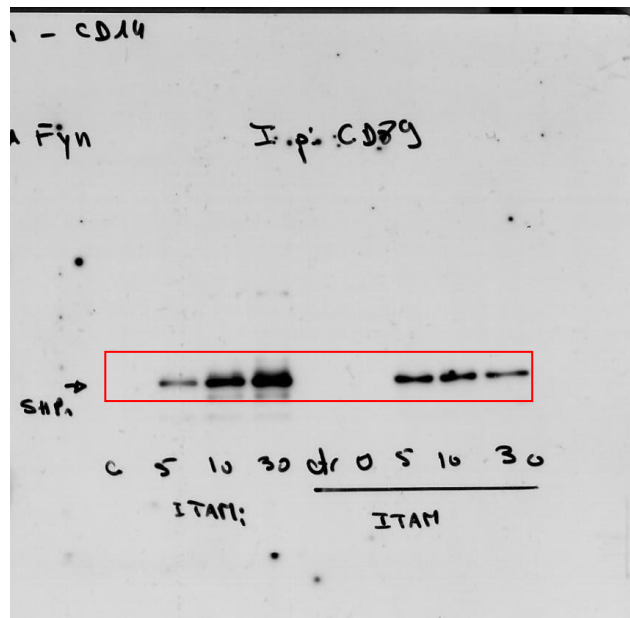

Supplementary Figure 2a  
Lysate, IB: Syk (Control siRNA)

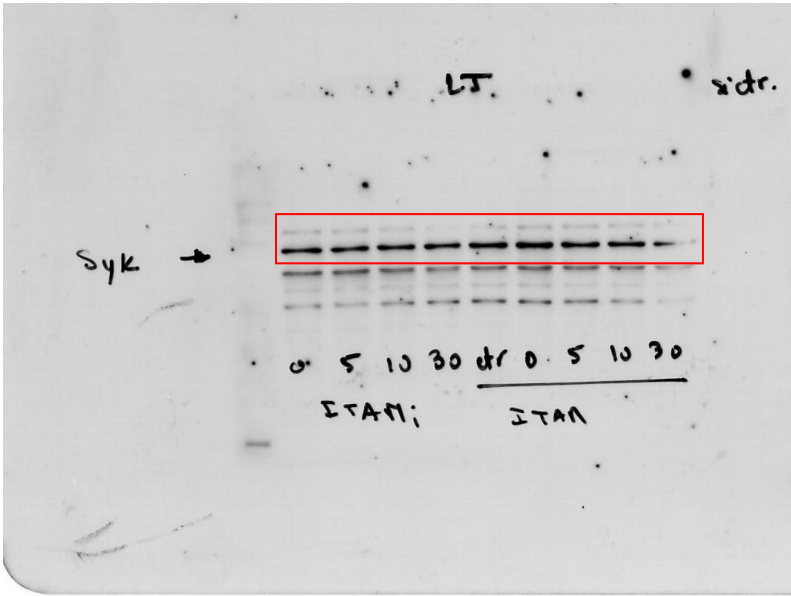

# Supplementary Figure 2a

IP: Fc $\alpha$ RI, IB: Fyn (Control siRNA)

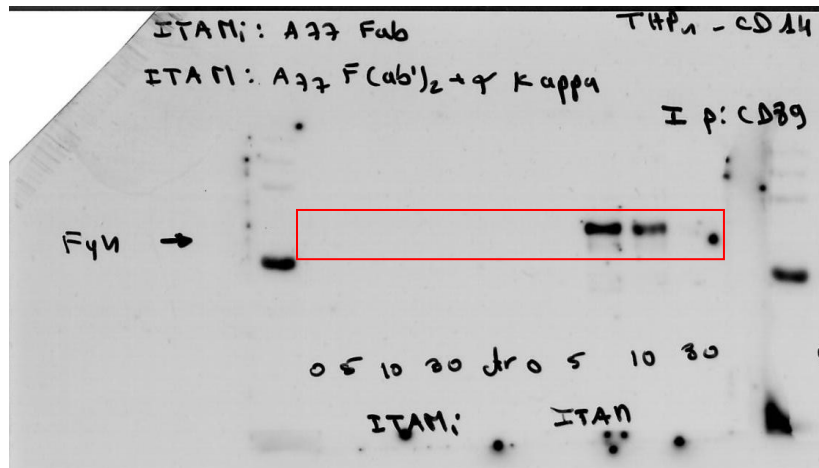

# Supplementary Figure 2a

IP: Fc $\alpha$ RI, IB: Syk (Control siRNA)

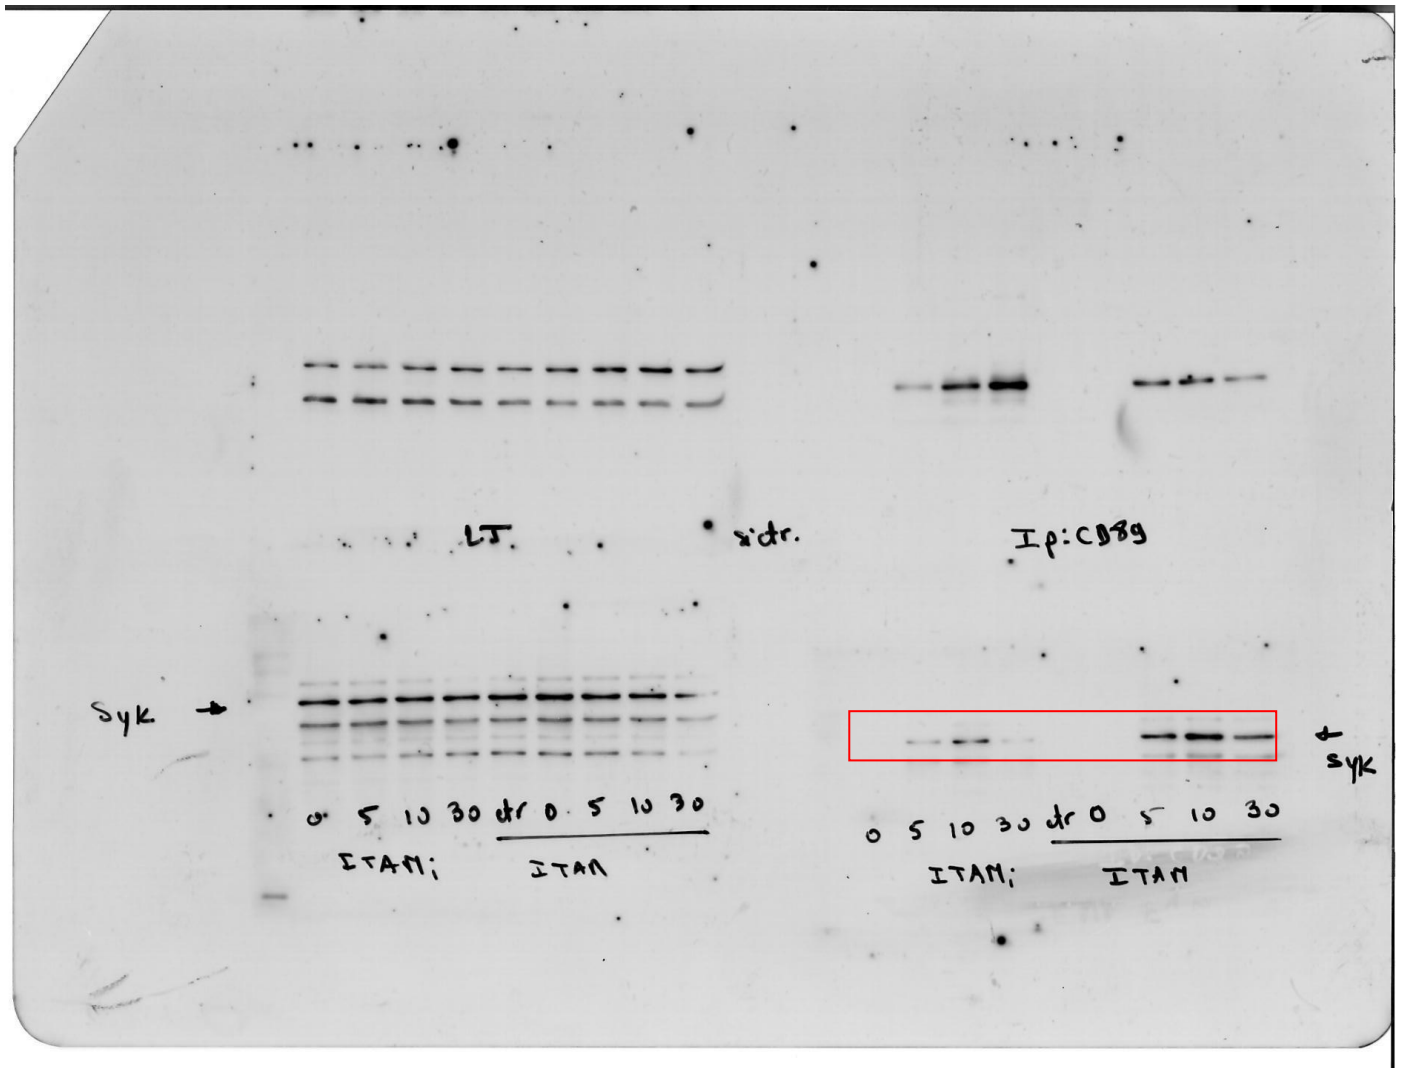

# Supplementary Figure 2a

IP: Fc $\alpha$ RI, IB: Lyn (Control siRNA)

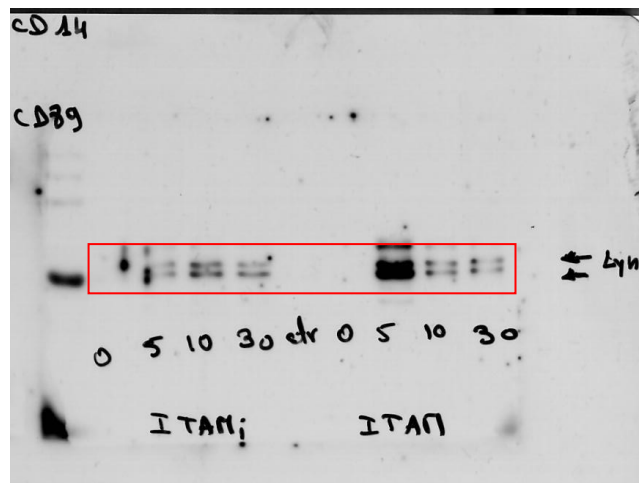

# Supplementary Figure 2a

IP: Fc $\alpha$ RI, IB: Fyn (Lyn siRNA)

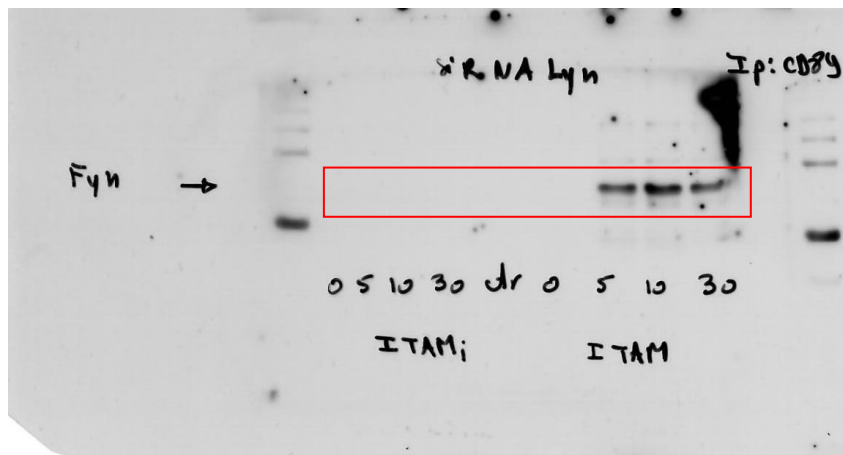



# Supplementary Figure 2a

IP: Fc $\alpha$ RI, IB: Lyn (Lyn siRNA)

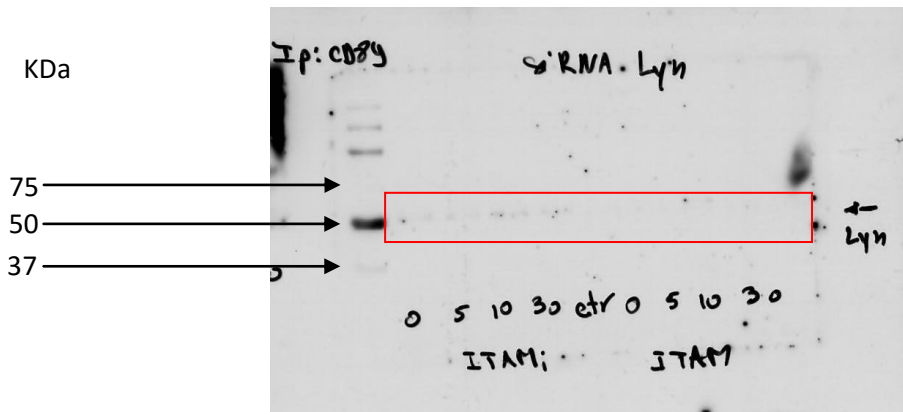

Supplementary Figure 2a  
IP: Fc $\alpha$ RI, IB: Lyn (Fyn siRNA)

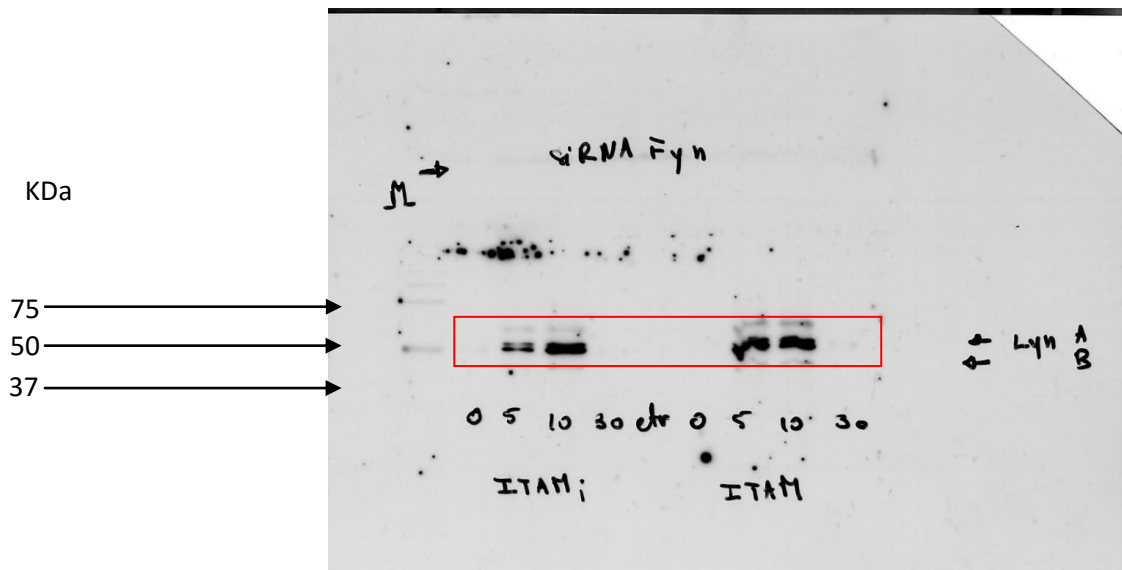

Supplementary Figure 2a  
IP: Fc $\alpha$ RI, IB: Fyn (Fyn siRNA)

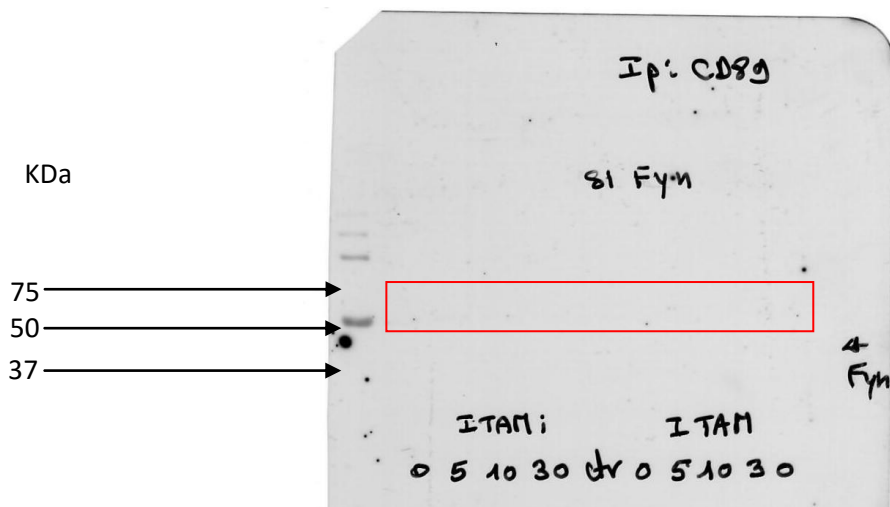

Supplementary Figure 2a  
Lysate, IB: Fyn (Fyn siRNA)

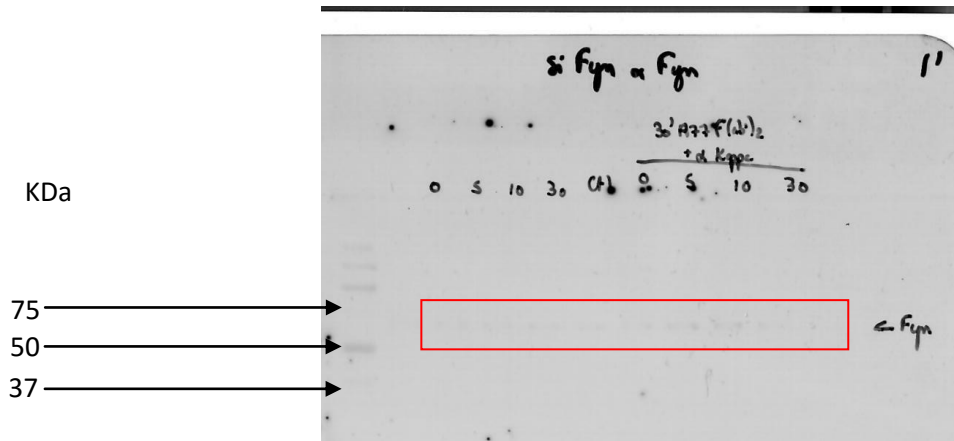

Supplementary Figure 2a  
IP: Fc $\alpha$ RI, IB: Syk (Fyn siRNA)

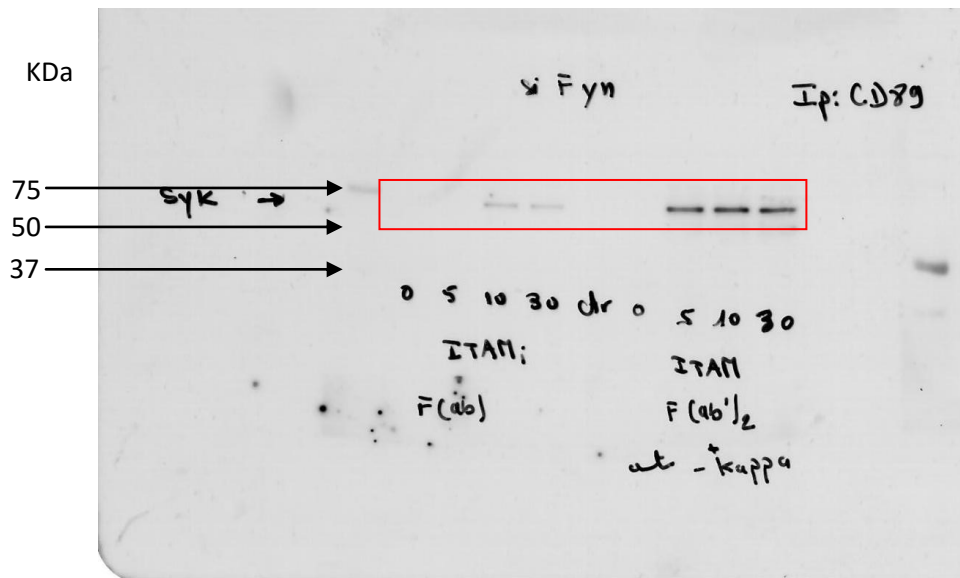



Supplementary Figure 2a  
Lysate, IB: Syk (Lyn siRNA)

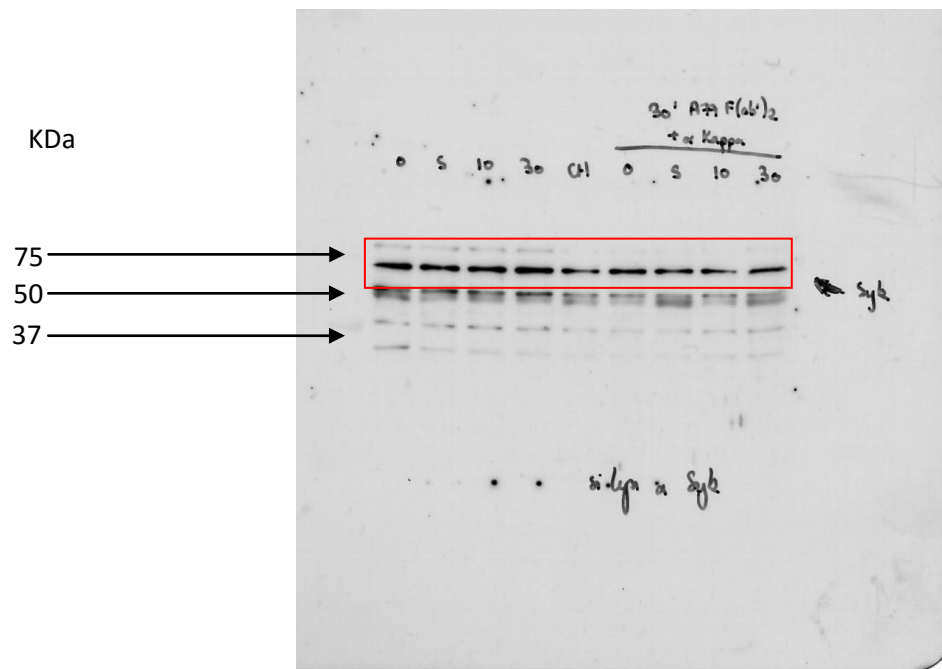





Supplementary Figure 2a  
IP: Fc $\alpha$ RI, IB: SHP-1 (Lyn siRNA)

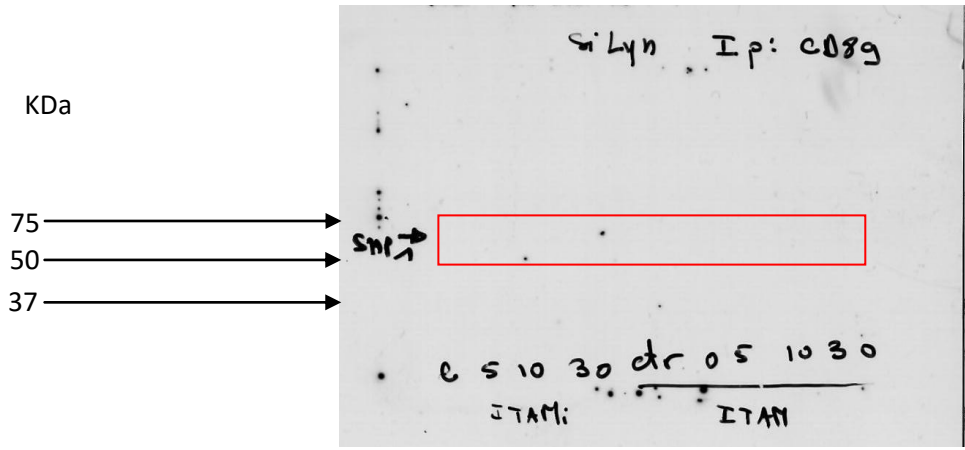

Supplementary Figure 3b  
Lysate, IB: SHP-1 (BCR-ITAMi)

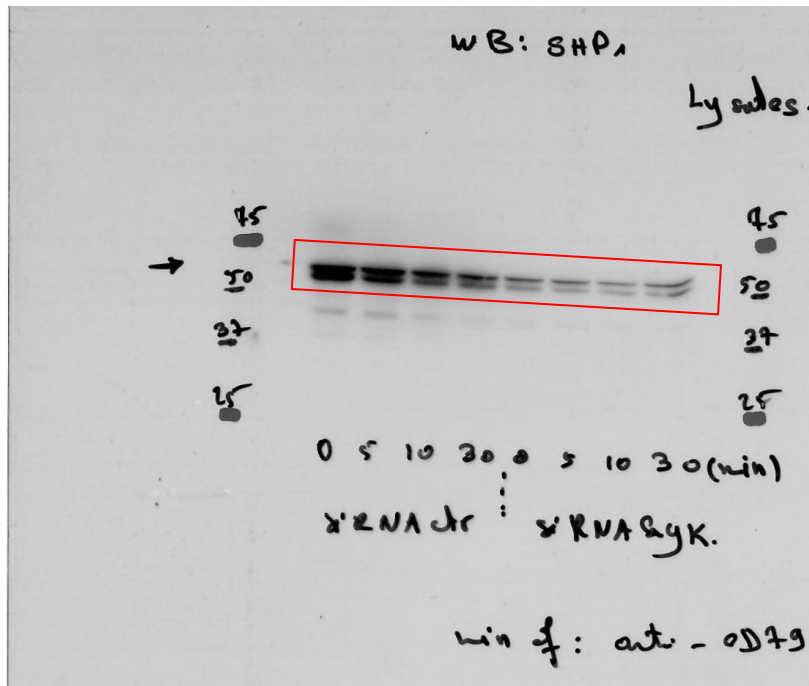

Supplementary Figure 3b

Lysate, IB: Lyn (BCR-ITAMi)

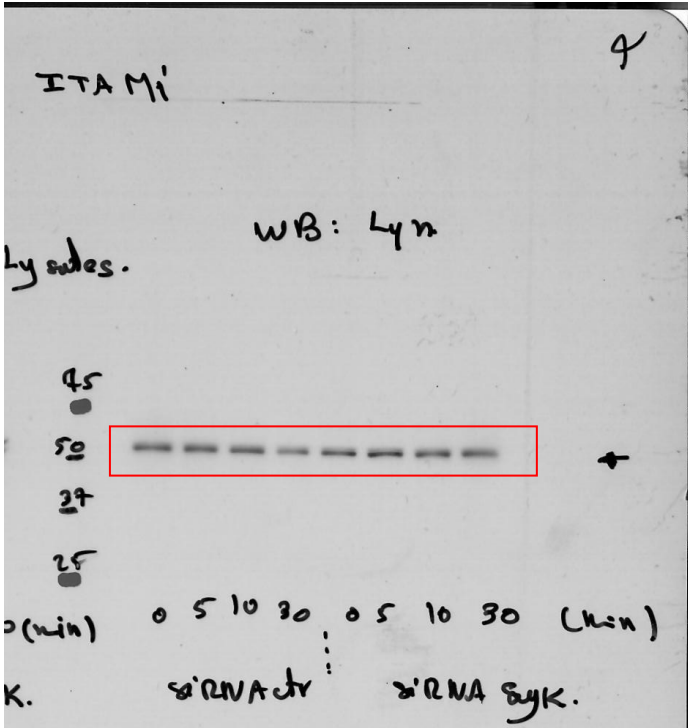

Supplementary Figure 3b  
IP: CD79a, IB: Fyn (BCR-ITAMi)

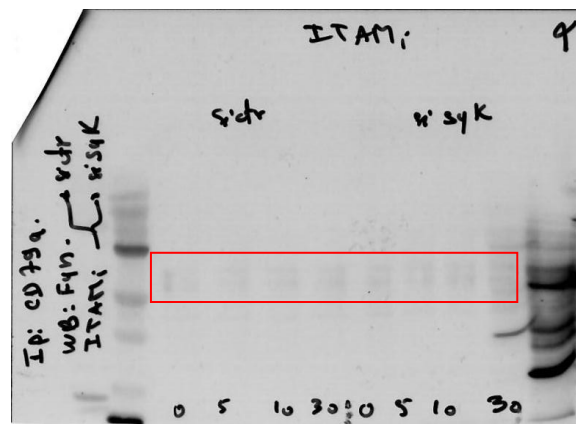

Supplementary Figure 3b  
Lysate, IB: Fyn (BCR-ITAMi)

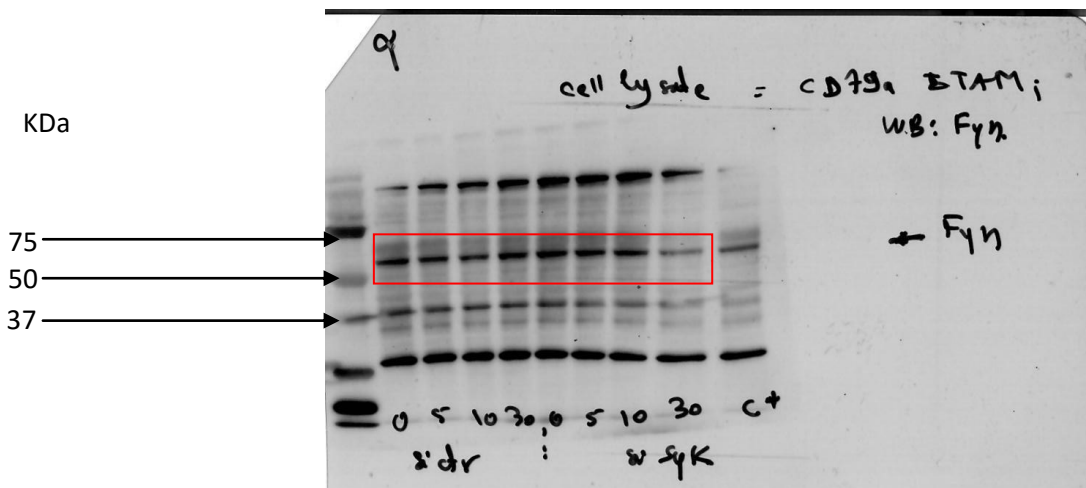

Supplementary Figure 3b  
IP: CD79a, IB: Syk (BCR-ITAMi)

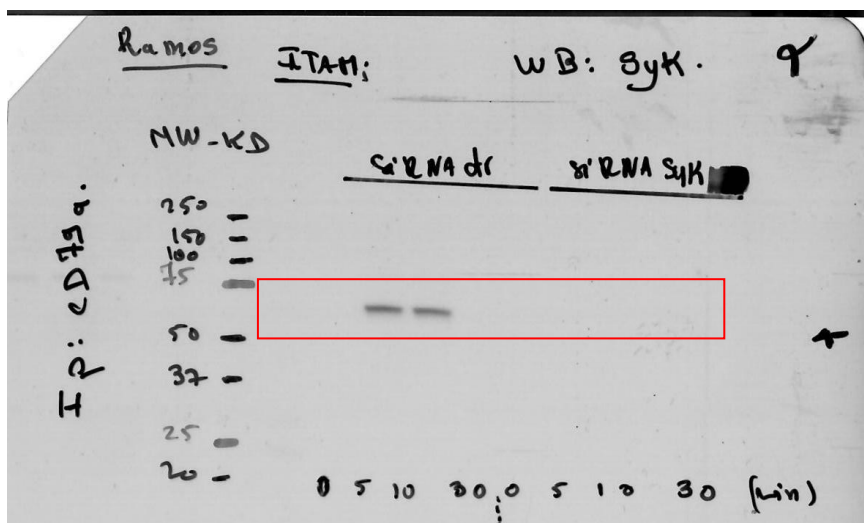

Supplementary Figure 3b

Lysate, IB: Syk (BCR-ITAMi)

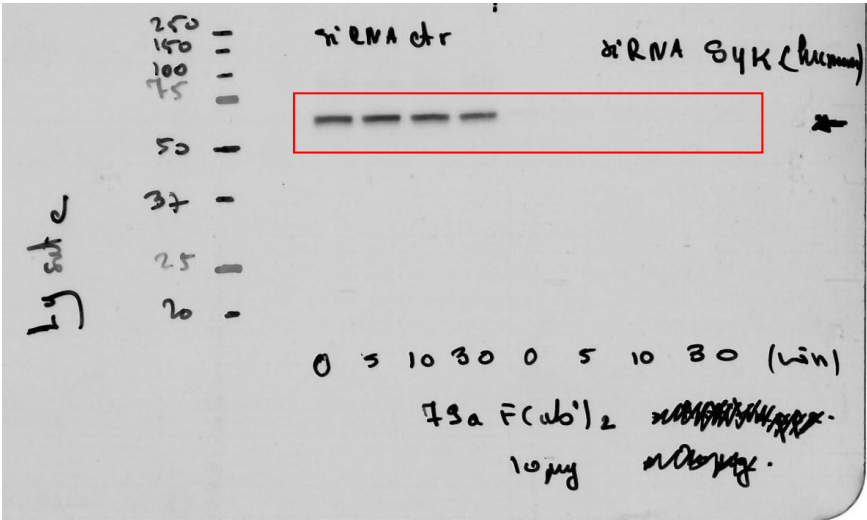

Supplementary Figure 3b

IP: CD79a, IB: SHP-1 (BCR-ITAM)

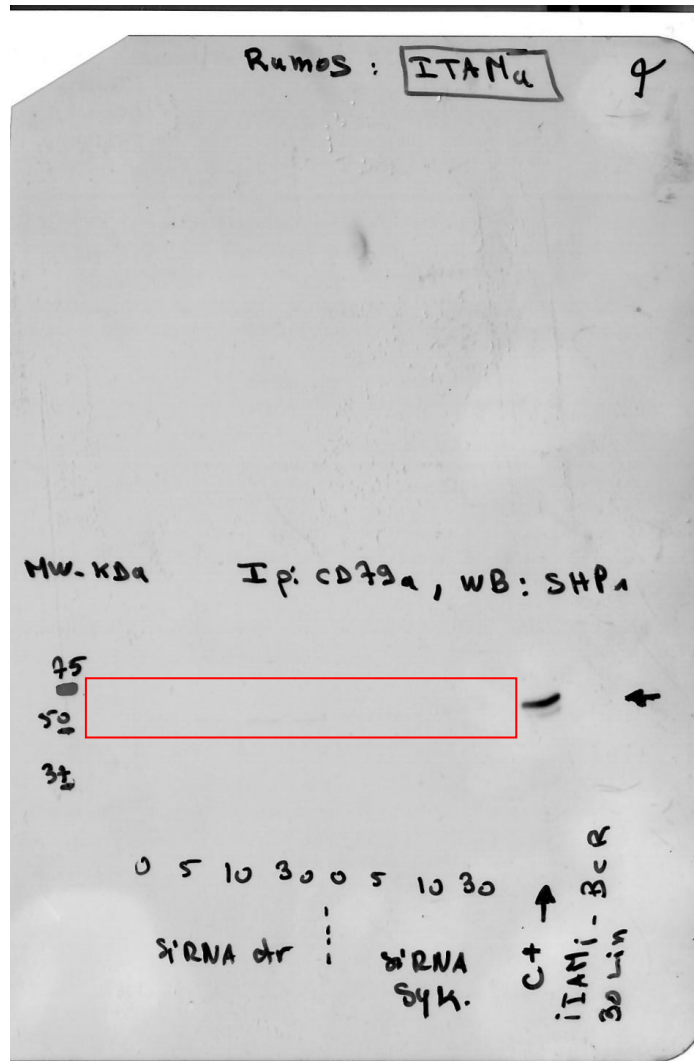



Supplementary Figure 3b  
IP: CD79a, IB: Fyn (BCR-ITAM)

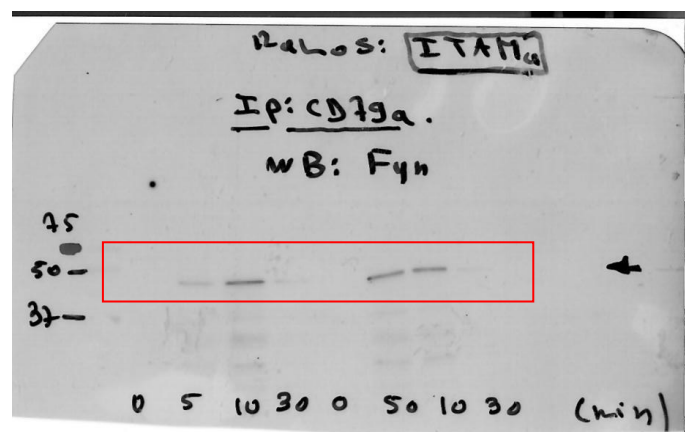

Supplementary Figure 3b  
IP: CD79a, IB: Syk (BCR-ITAM)

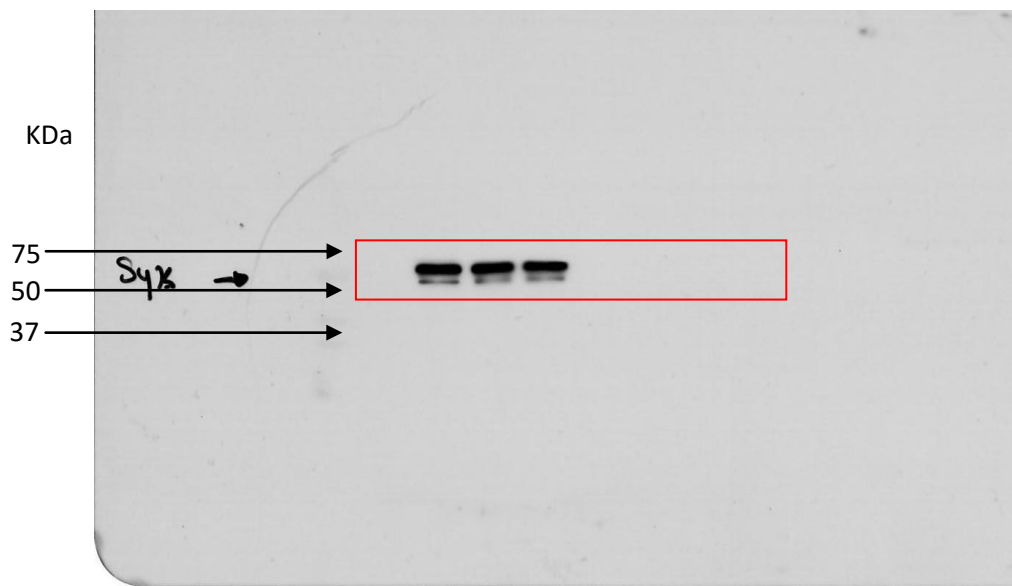

Supplementary Figure 3b

IP: CD79a, IB: Lyn (BCR-ITAMi)

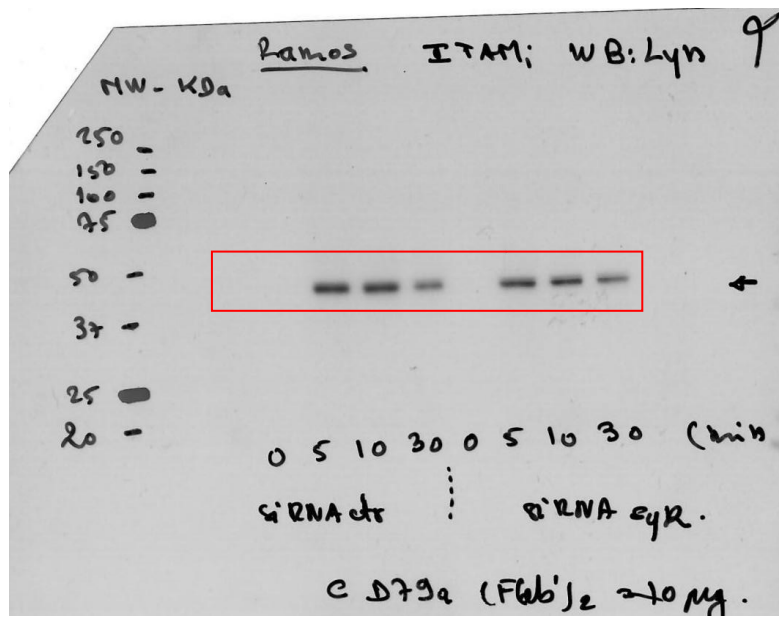

Supplementary Figure 3b

IP: CD79a, IB: SHP-1 (BCR-ITAMi)

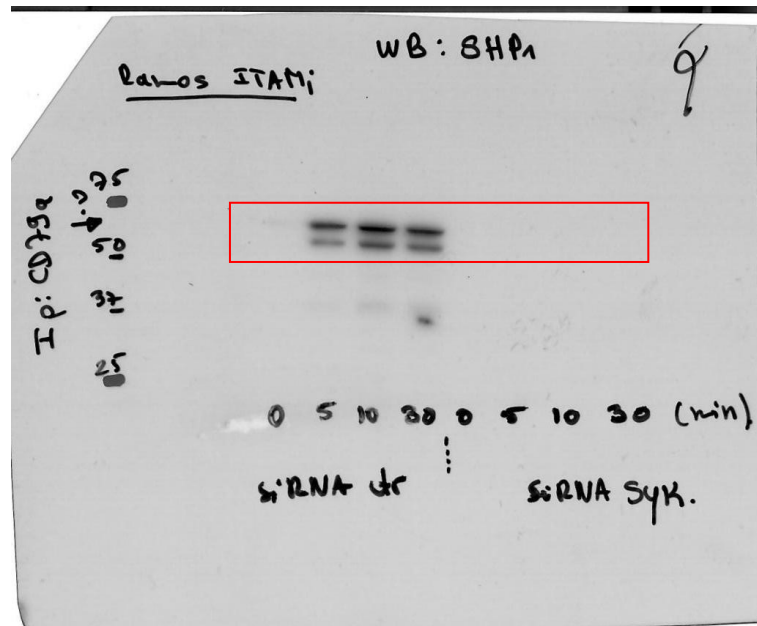

# Supplementary Figure 3b

Lysate, IB: Lyn (BCR-ITAM)

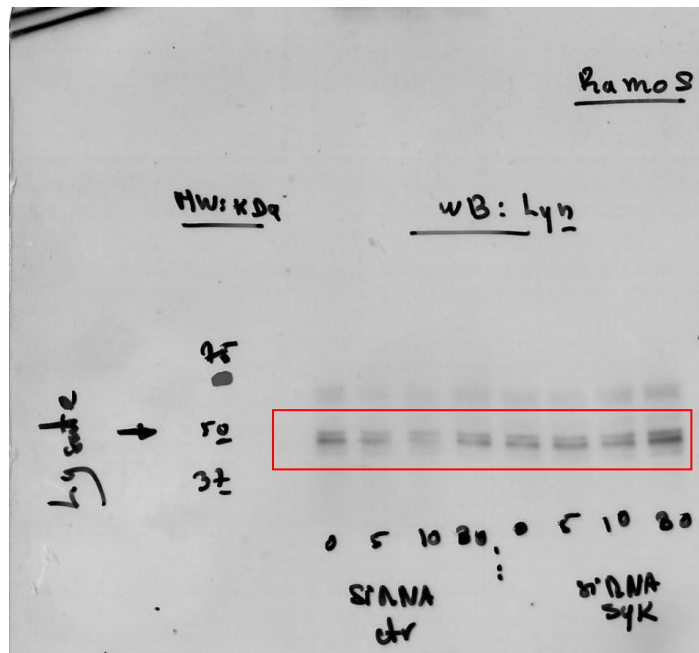

Supplementary Figure 3b

Lysate, IB: Fyn (BCR-ITAM)

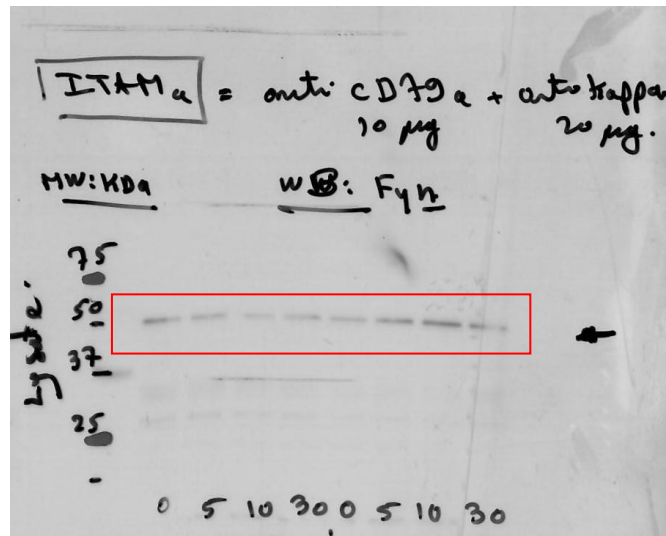

Supplementary Figure 3b  
Lysate, IB: SHP-1 (BCR-ITAM)

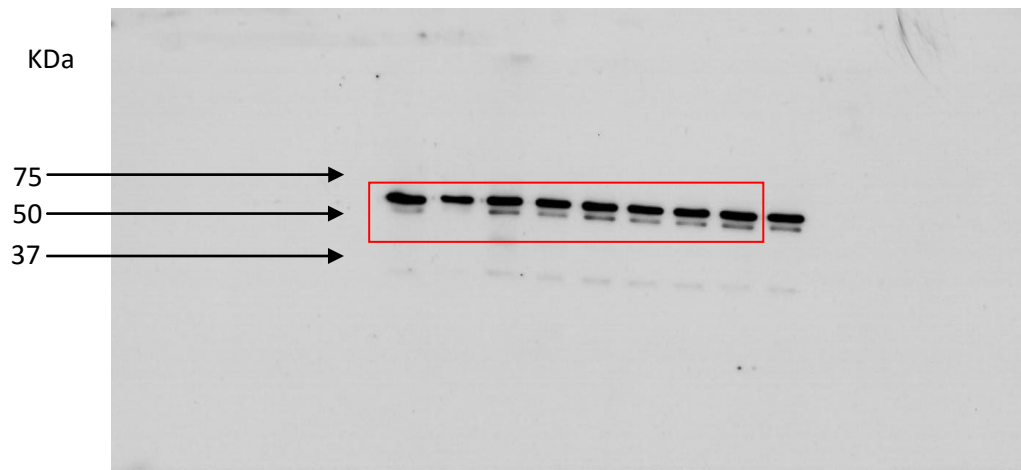

Supplementary Figure 3b  
Lysate, IB: Syk (BCR-ITAM)

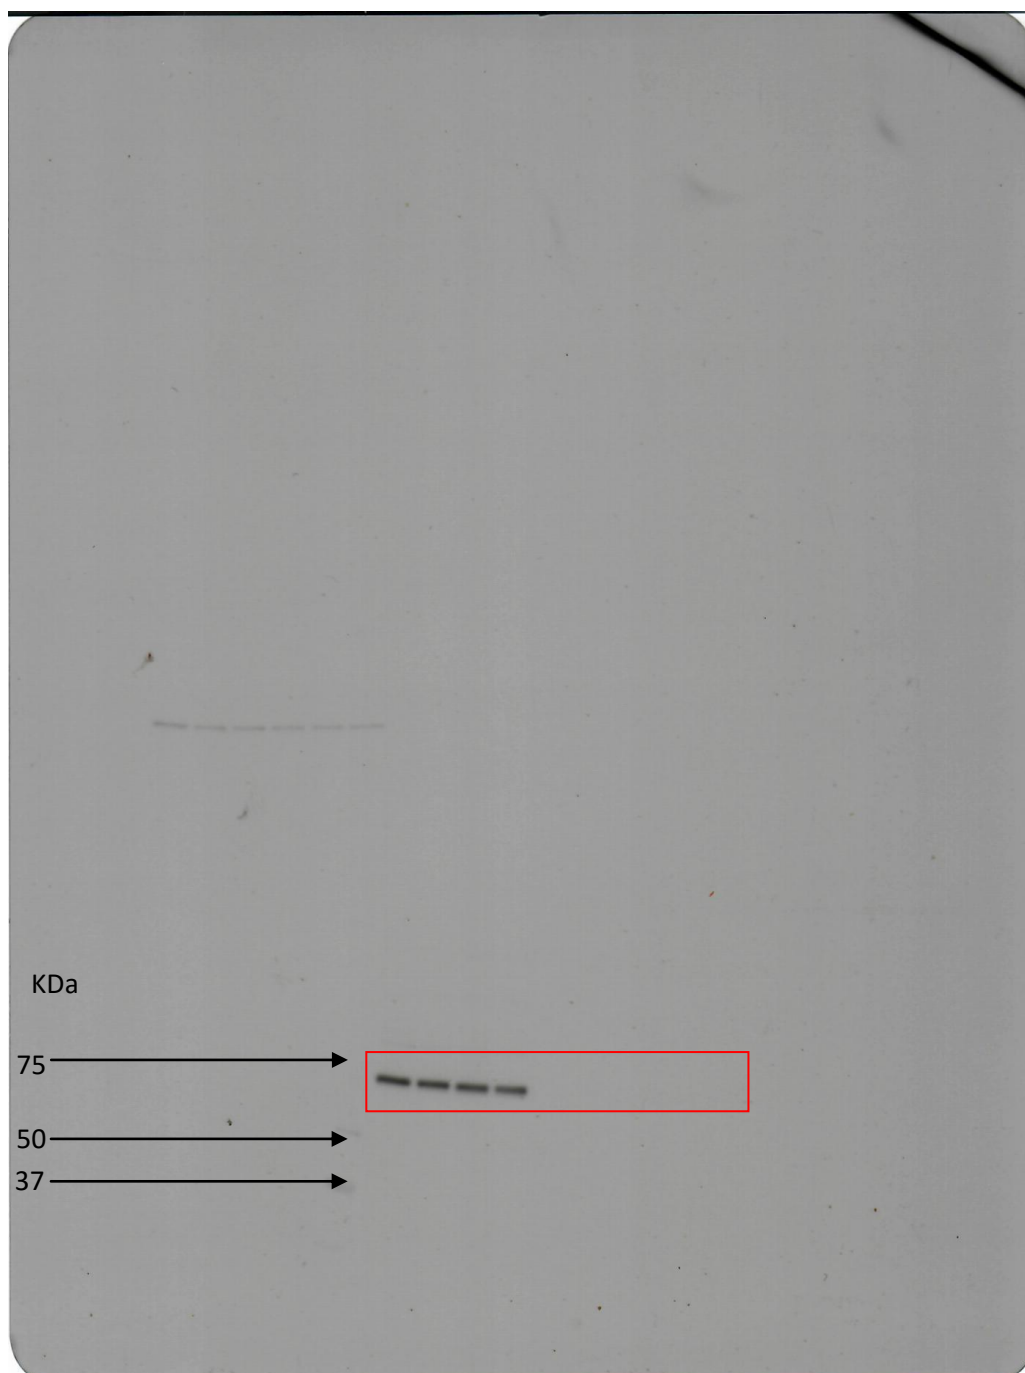



Supplementary Figure 3b  
IP: CD79a, IB: Lyn (BCR-ITAM)

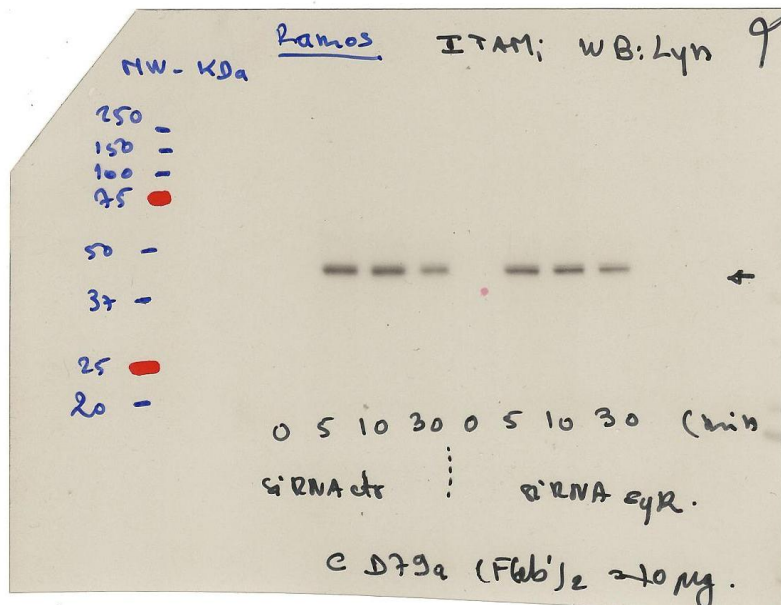

# Supplementary Figure 3a

## Lysate, IB: Fyn (FcγRIIA-ITAM)

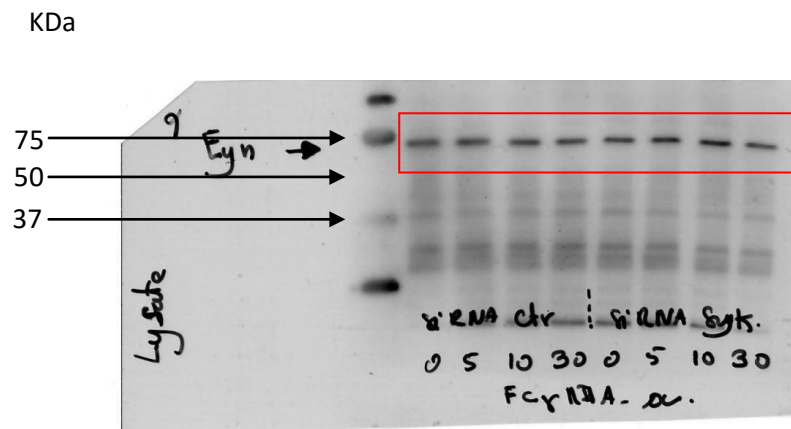

Supplementary Figure 3a  
Lysate, IB: Lyn (FcγRIIA-ITAM)

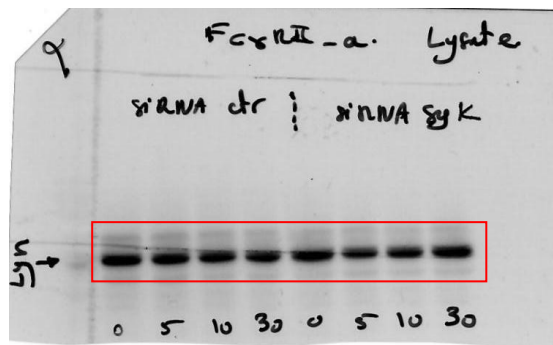

Supplementary Figure 3a  
Lysate, IB: Lyn (FcγRIIA-ITAMi)

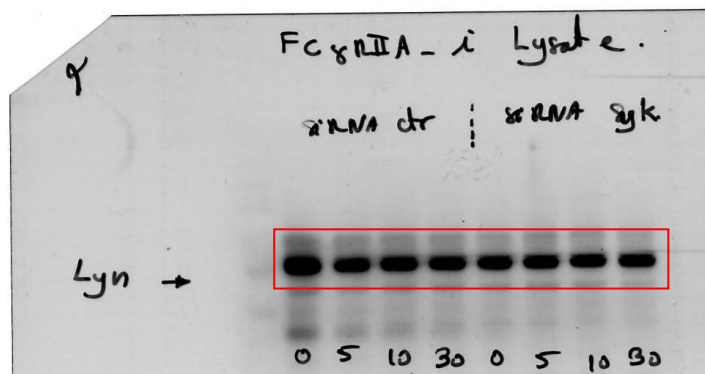

# Supplementary Figure 3a

IP: FcγRIIA, IB: Lyn (FcγRIIA-ITAM)

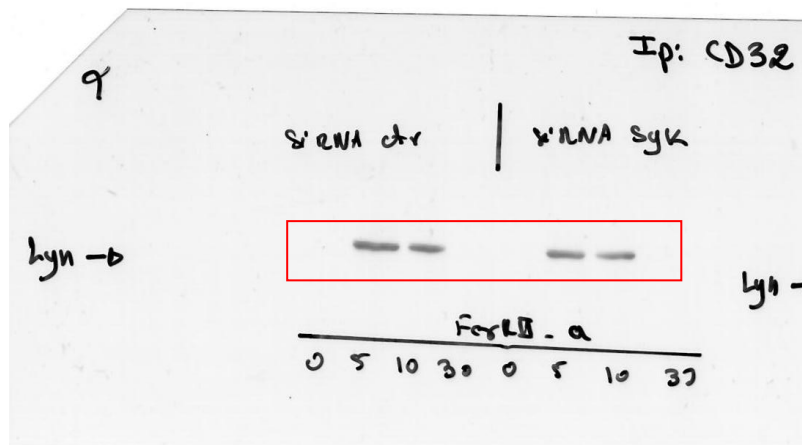

# Supplementary Figure 3a

IP: FcγRIIA, IB: Lyn (FcγRIIA-ITAM)

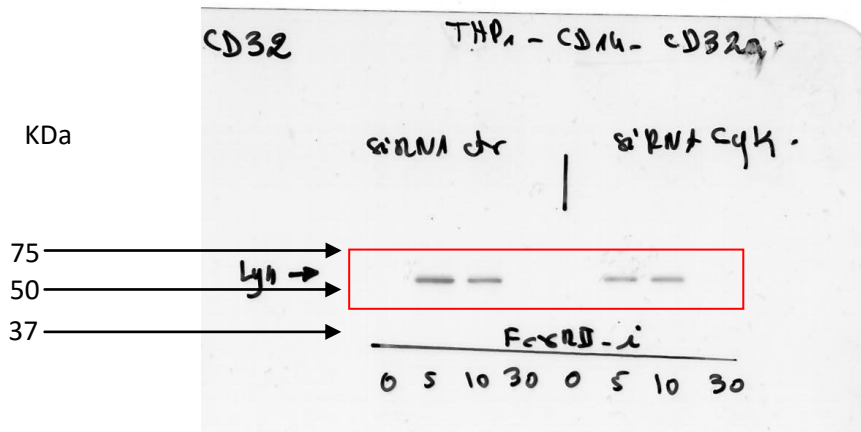

# Supplementary Figure 3a

IP: FcγRIIA, IB: Fyn (FcγRIIA-ITAM)

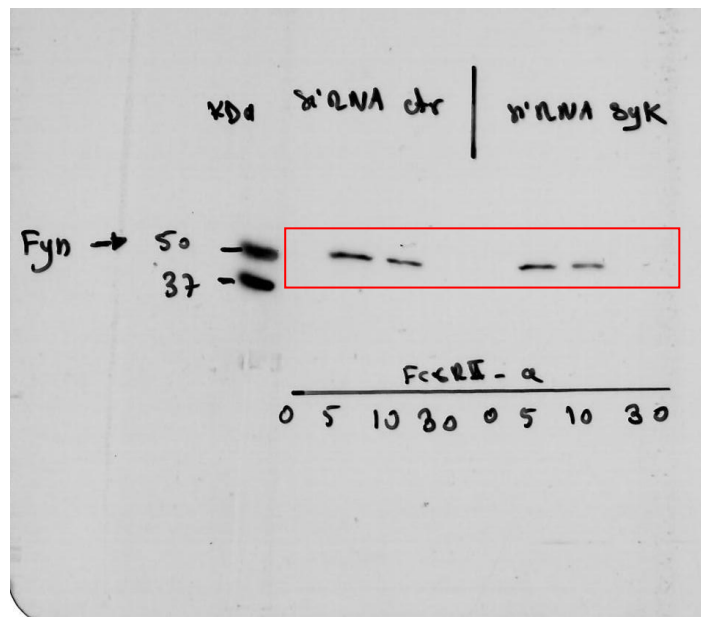

# Supplementary Figure 3a

IP: FcγRIIA, IB: SHP-1 (FcγRIIA-ITAMi)

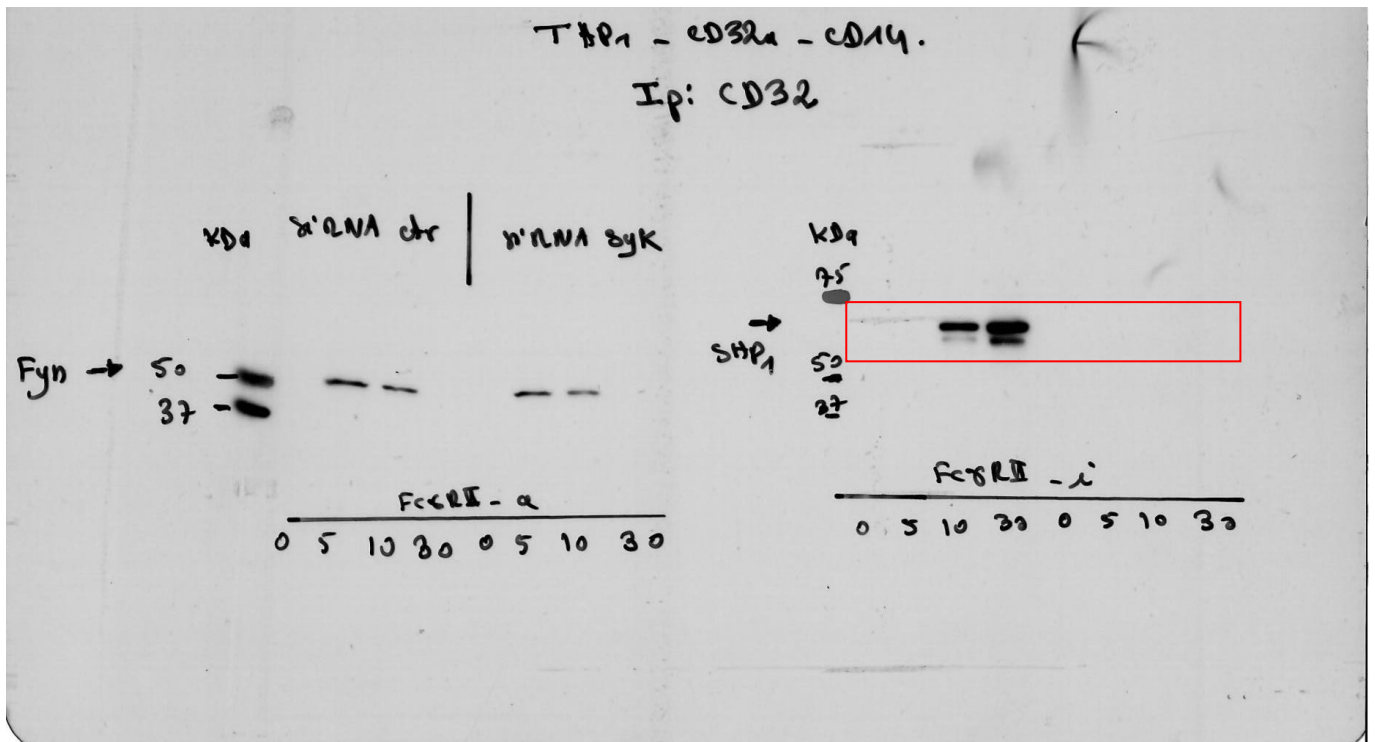



# Supplementary Figure 3a

IP: FcγRIIA, IB: Syk (FcγRIIA-ITAM)

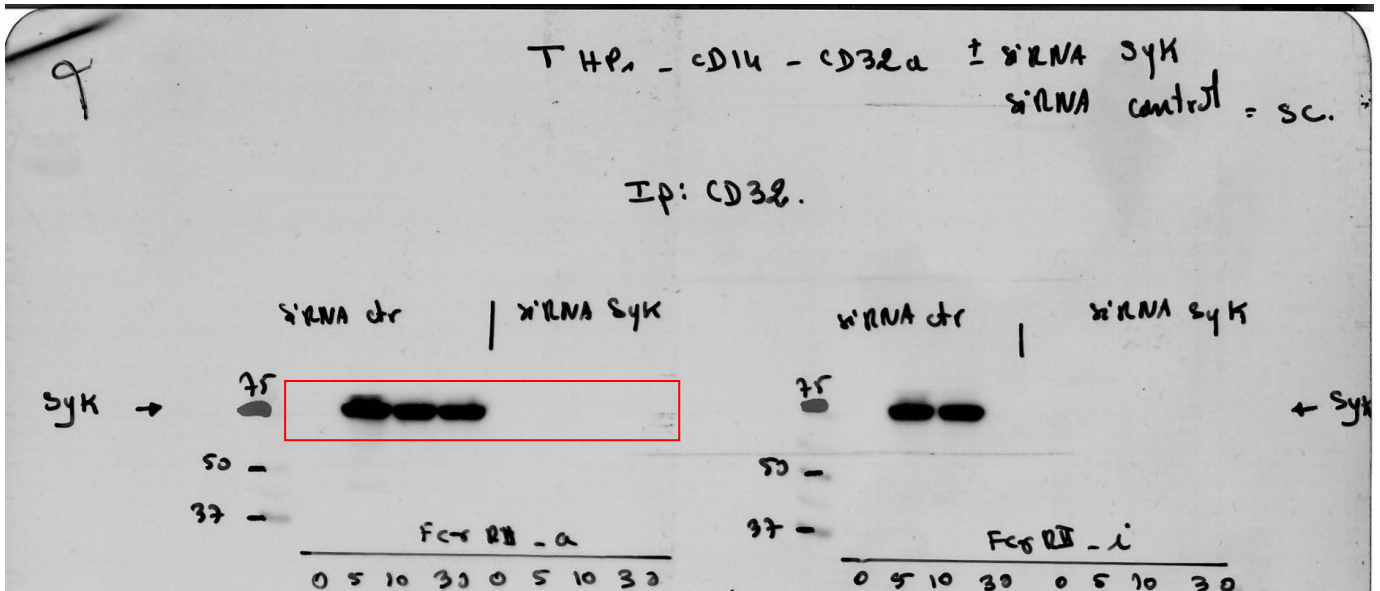

# Supplementary Figure 3a

IP: FcγRIIA, IB: Syk (FcγRIIA-ITAMi)

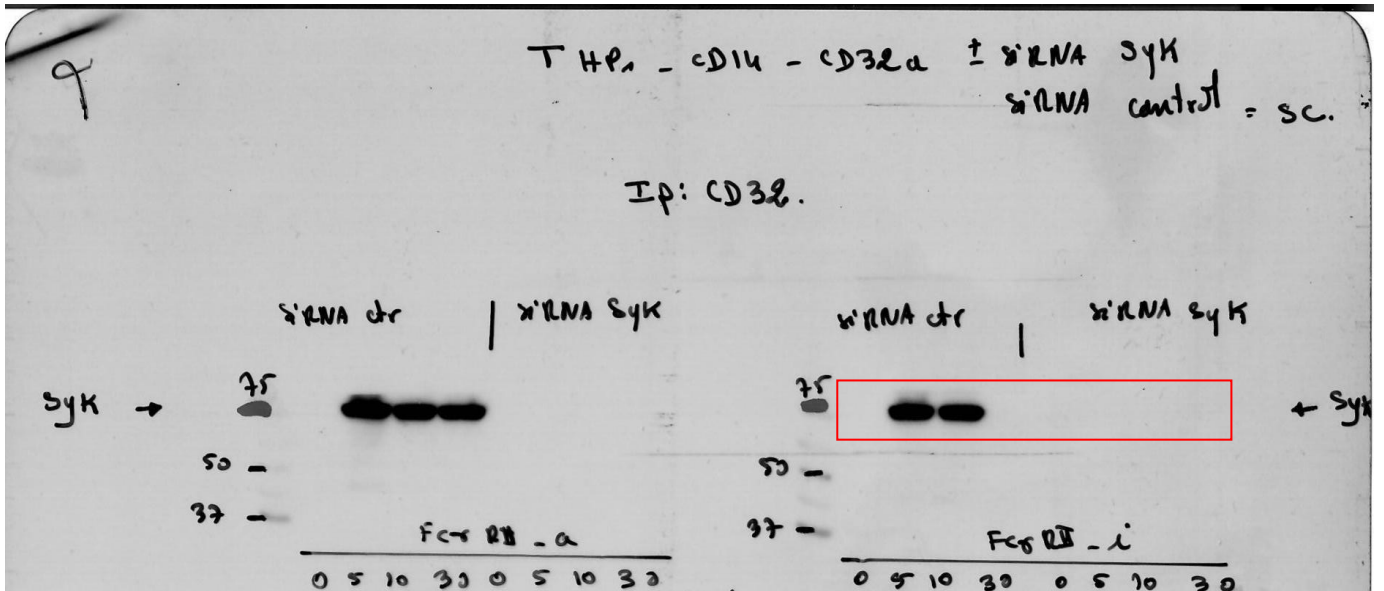

Supplementary Figure 3a  
Lysate, IB: Syk (FcγRIIA-ITAM)

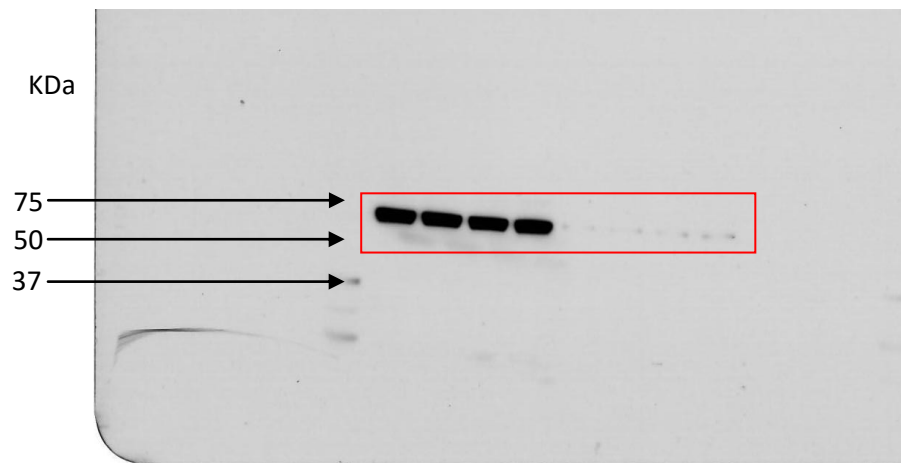

Supplementary Figure 3a  
Lysate, IB: Syk (Fc $\gamma$ RIIA-ITAM)

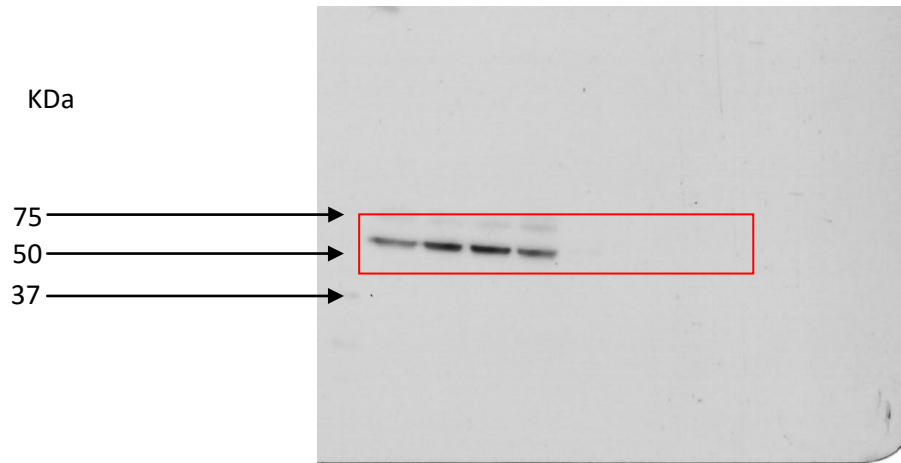

# Supplementary Figure 3a

Lysate, IB: SHP-1 (FcγRIIA-ITAM)

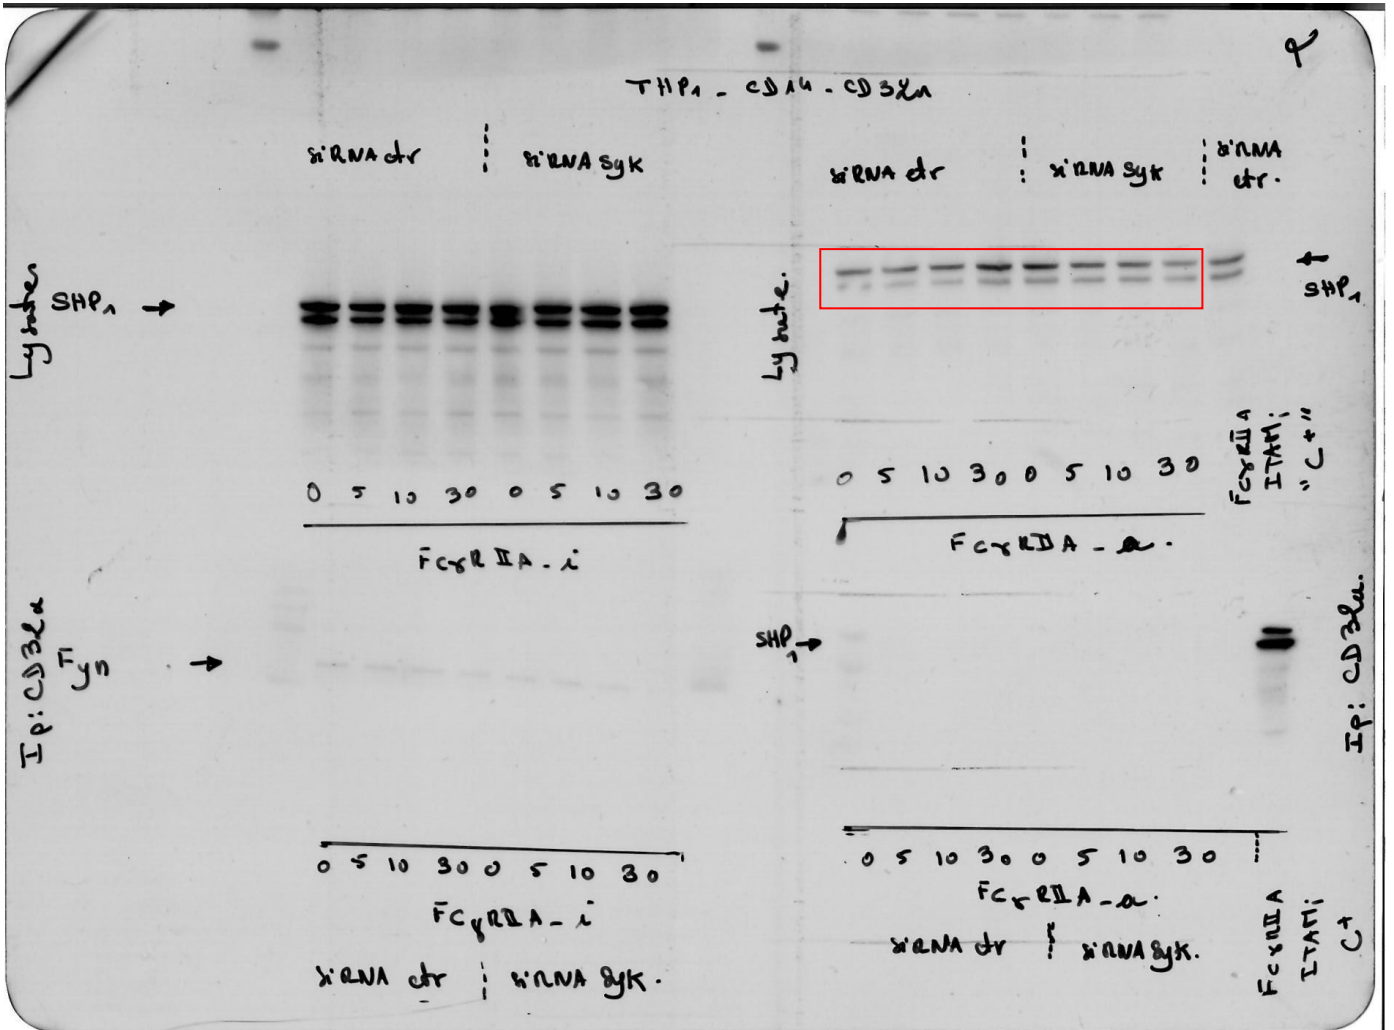

# Supplementary Figure 3a

## Lysate, IB: SHP-1 (FcγRIIA-ITAMi)

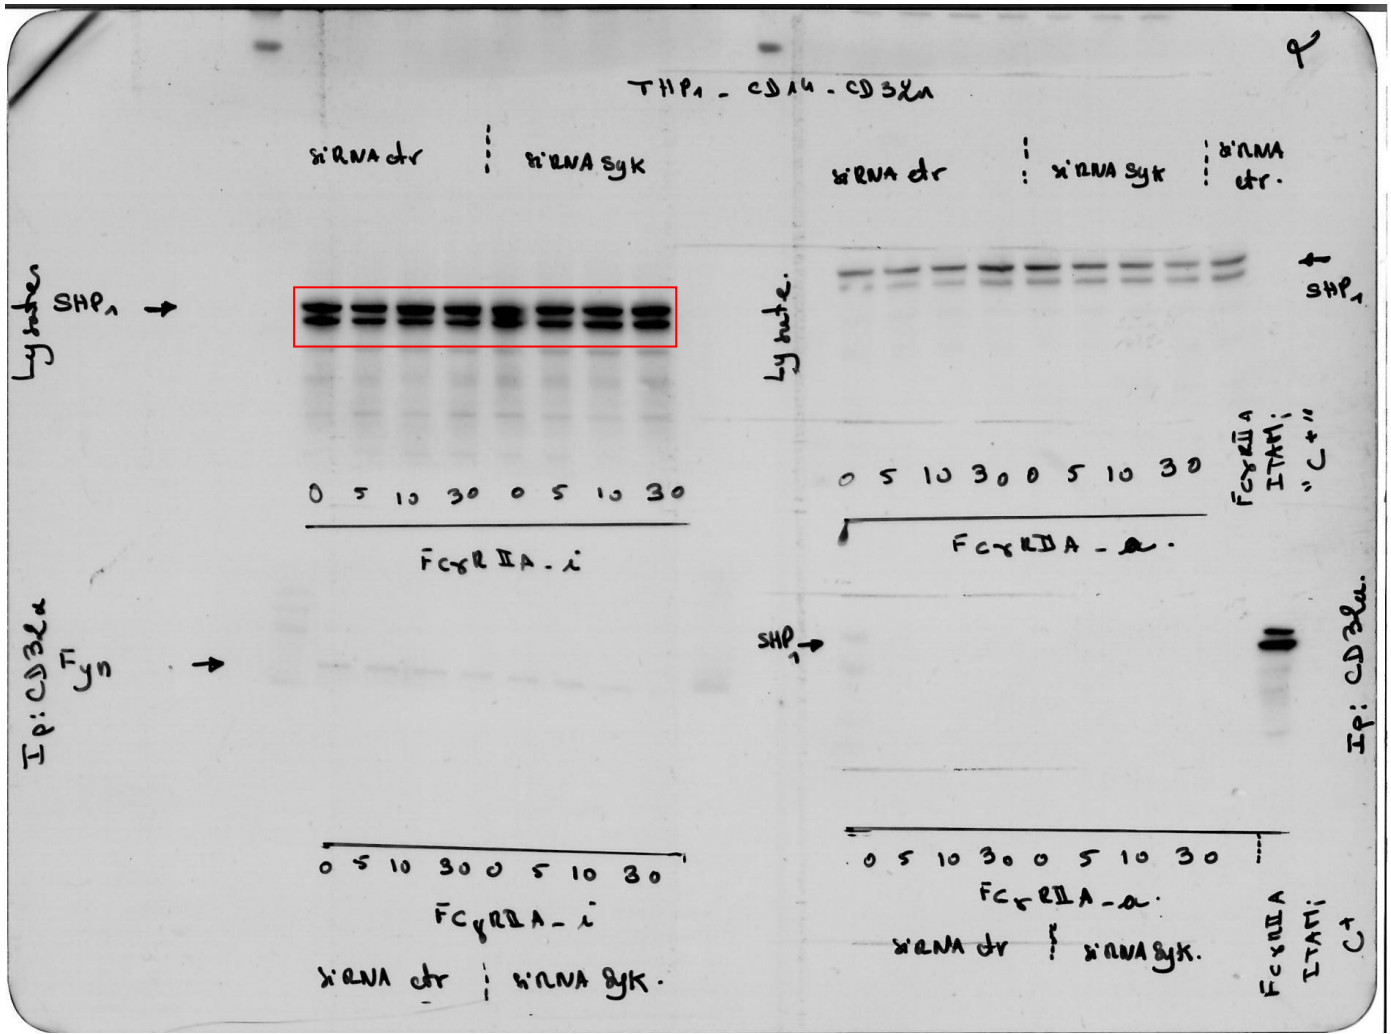

# Supplementary Figure 3a

IP: FcγRIIA, IB: SHP-1 (FcγRIIA-ITAM)

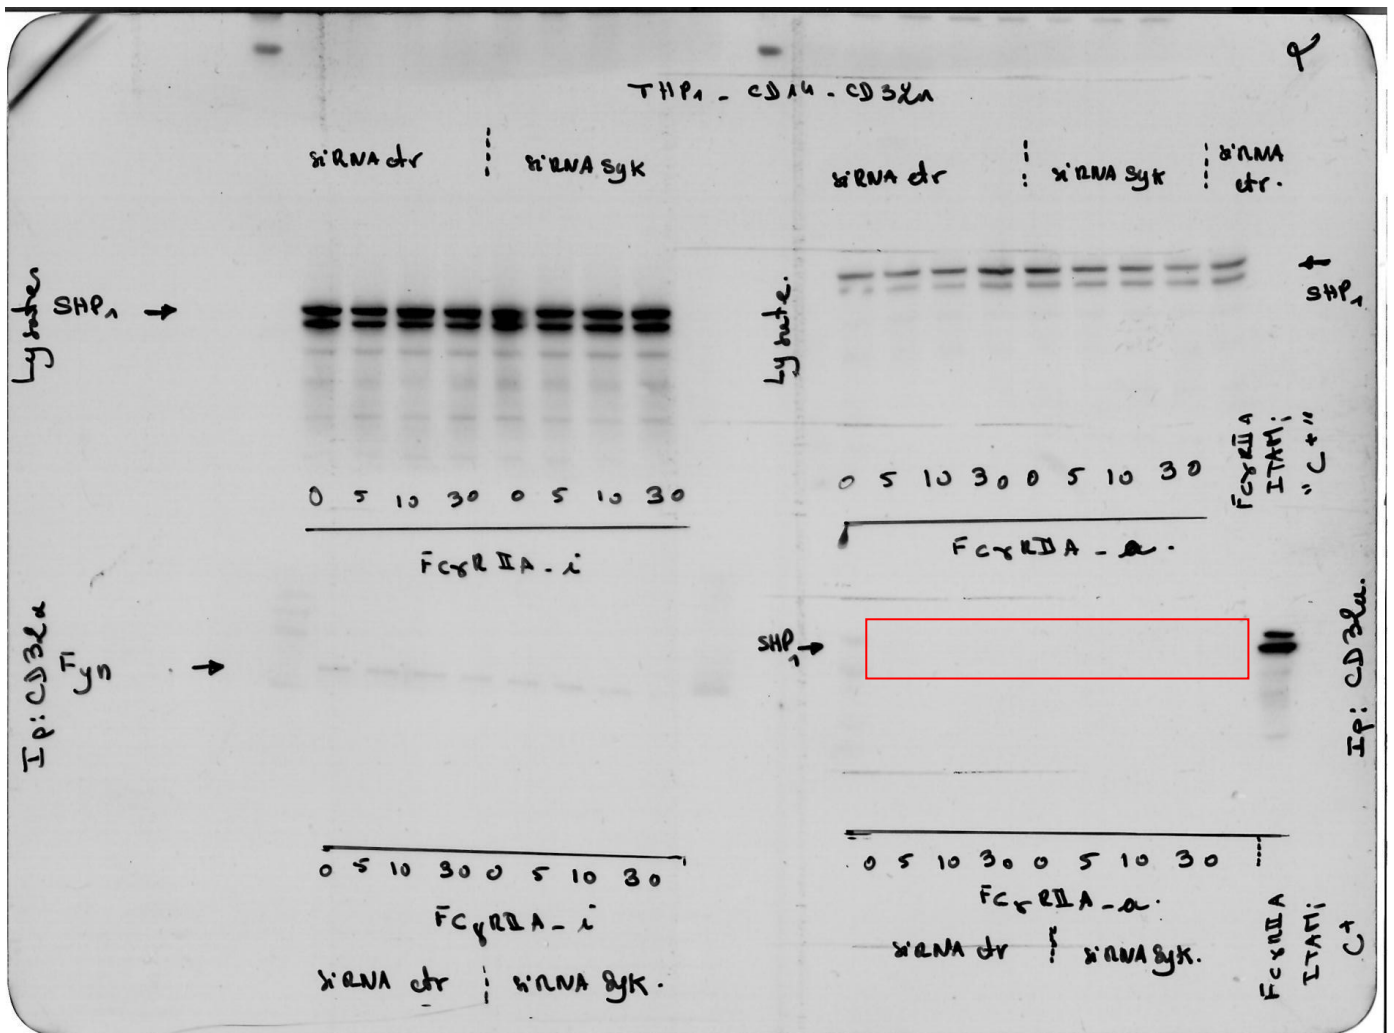

# Supplementary Figure 3a

IP: FcγRIIA, IB: Fyn (FcγRIIA-ITAMI)

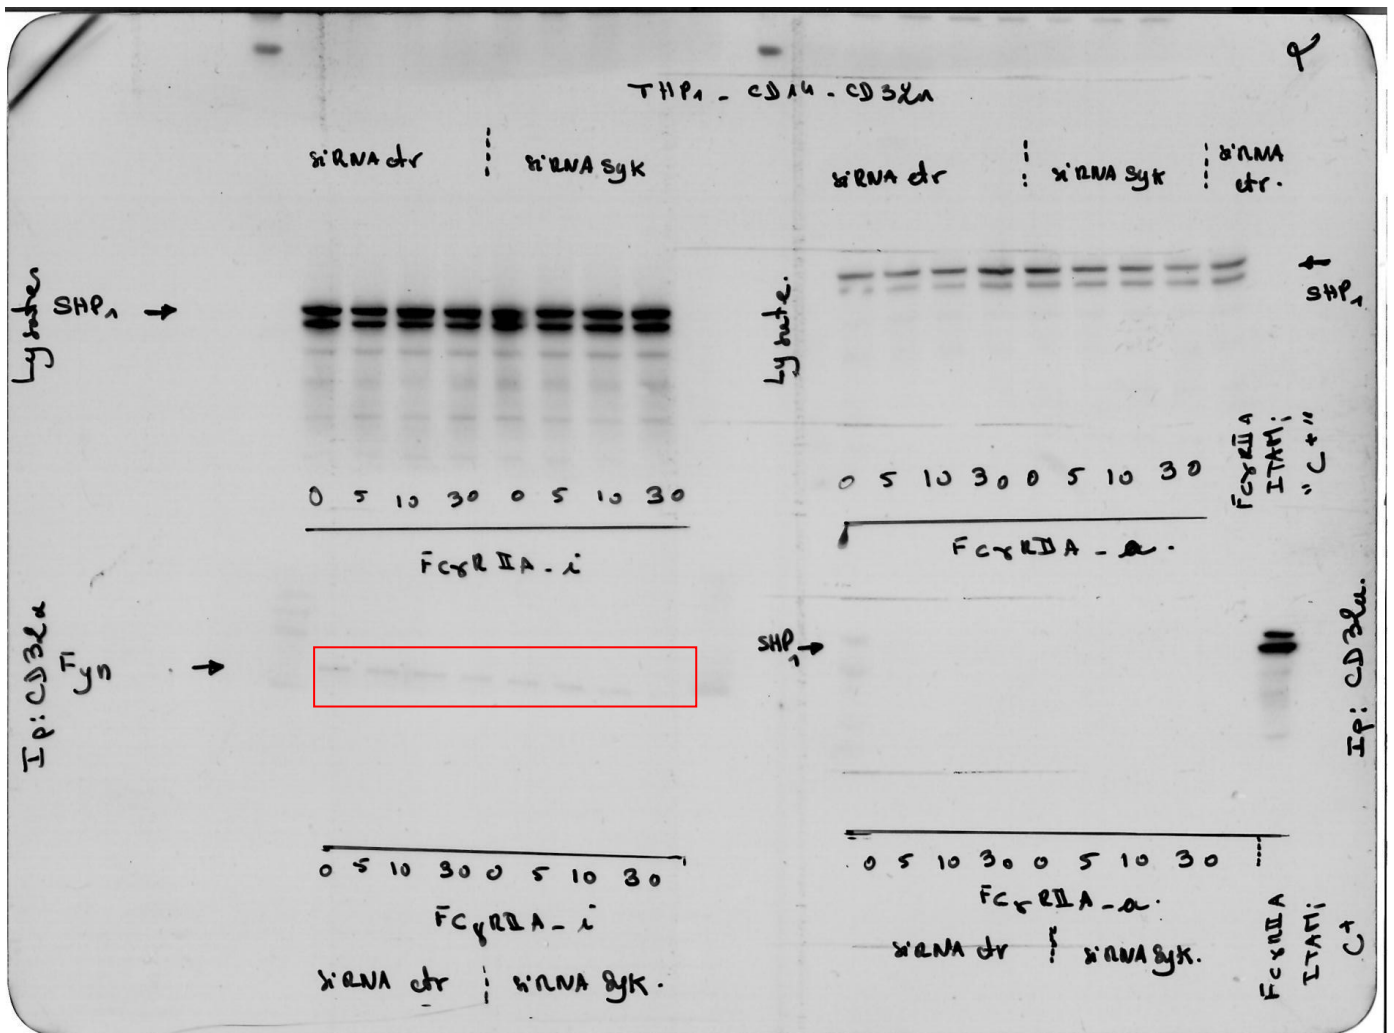



Supplementary Figure 3a  
Lysate, IB: Fyn (FcγRIIA-ITAMi)

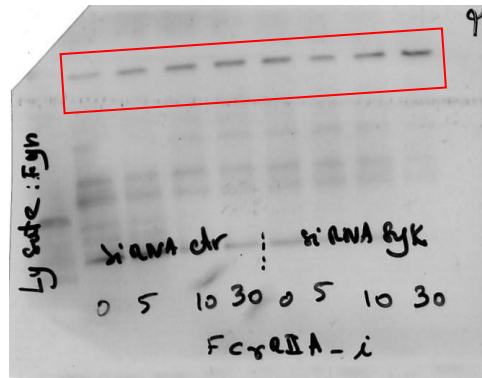

Supplementary Figure 3c  
IB: pSyk<sup>Y525/526</sup> (PI3K inhibitor)

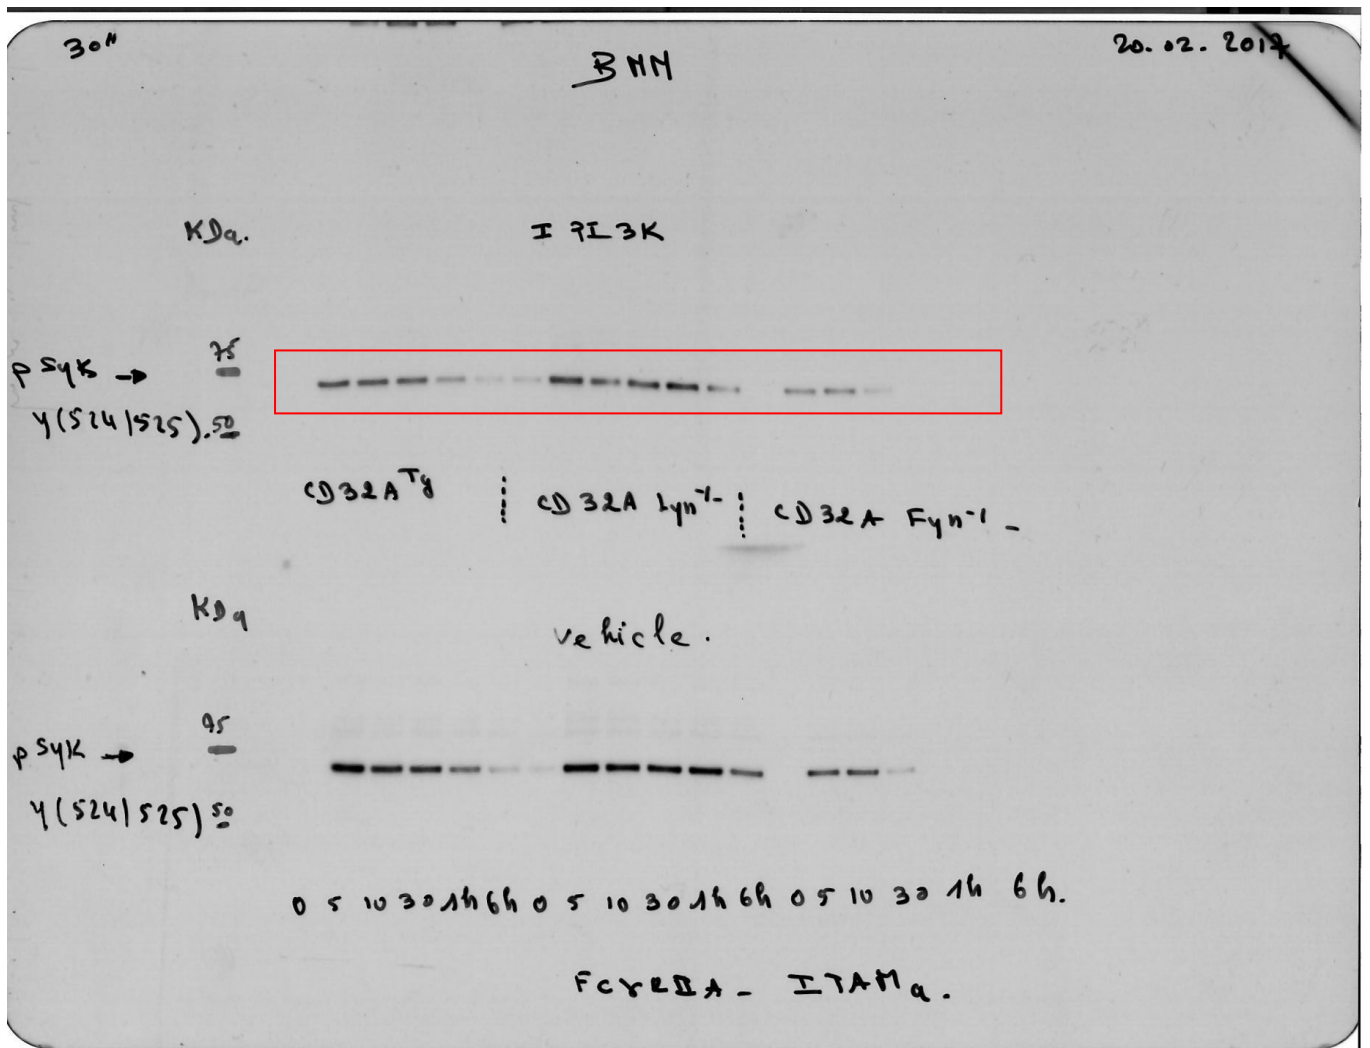

Supplementary Figure 3c

IB: pSyk<sup>Y525/526</sup> (Vehicle)

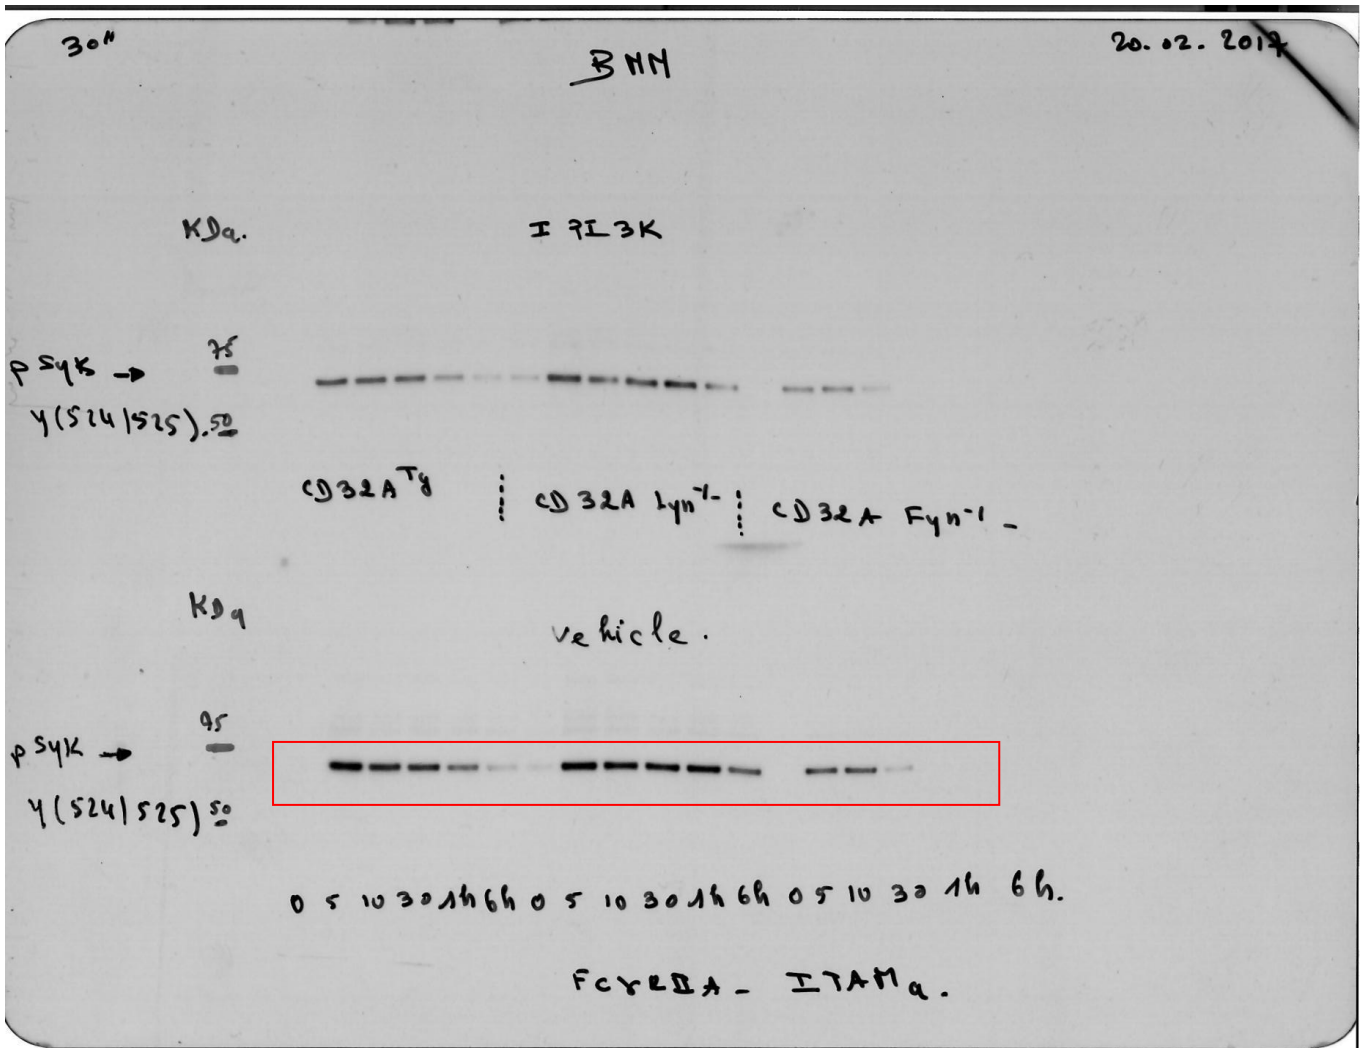

Supplementary Figure 3c

IB: Syk (Vehicle)

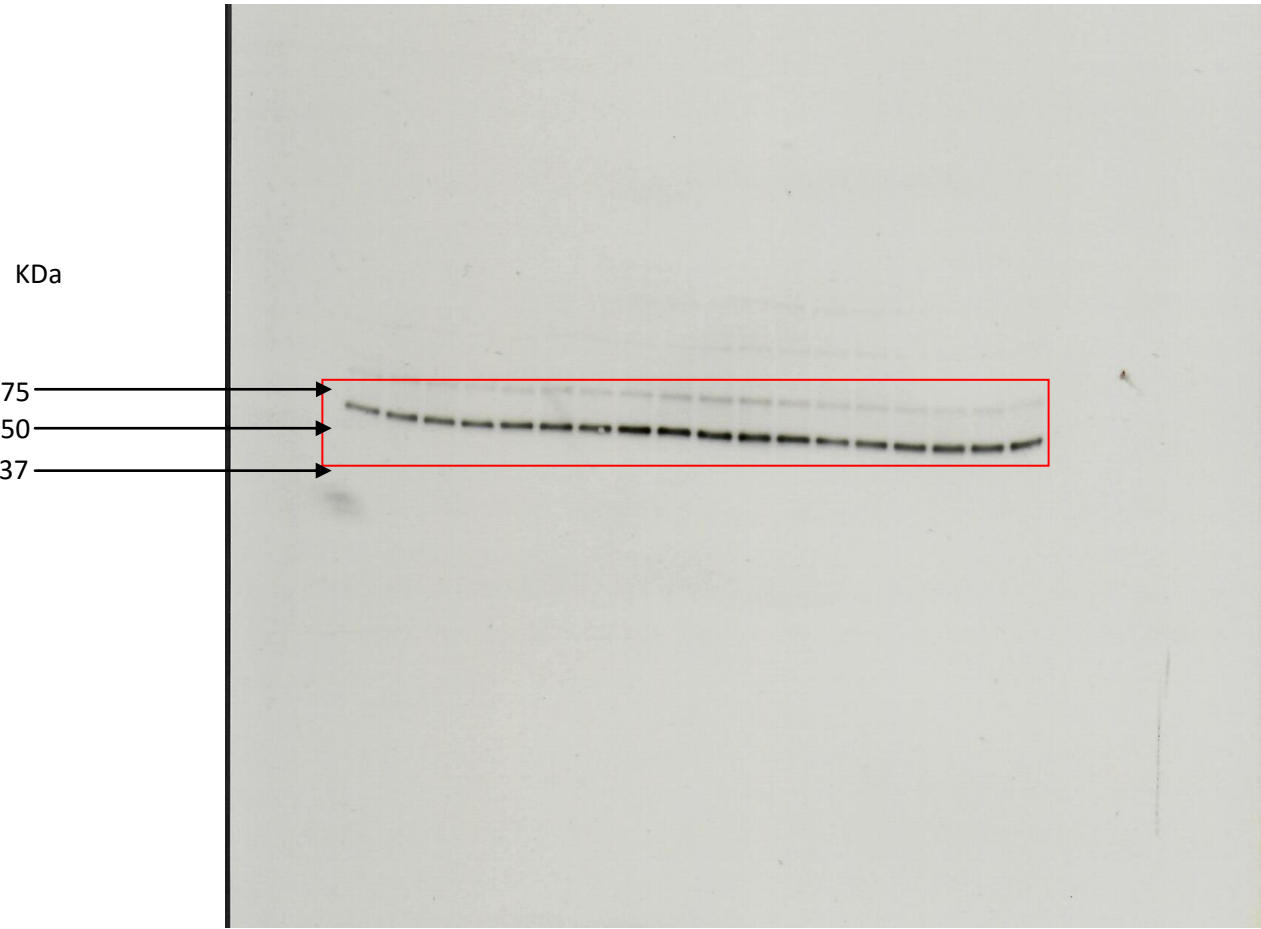

Supplementary Figure 3c  
 IB: pSyk<sup>Y525/526</sup> (control siRNA)

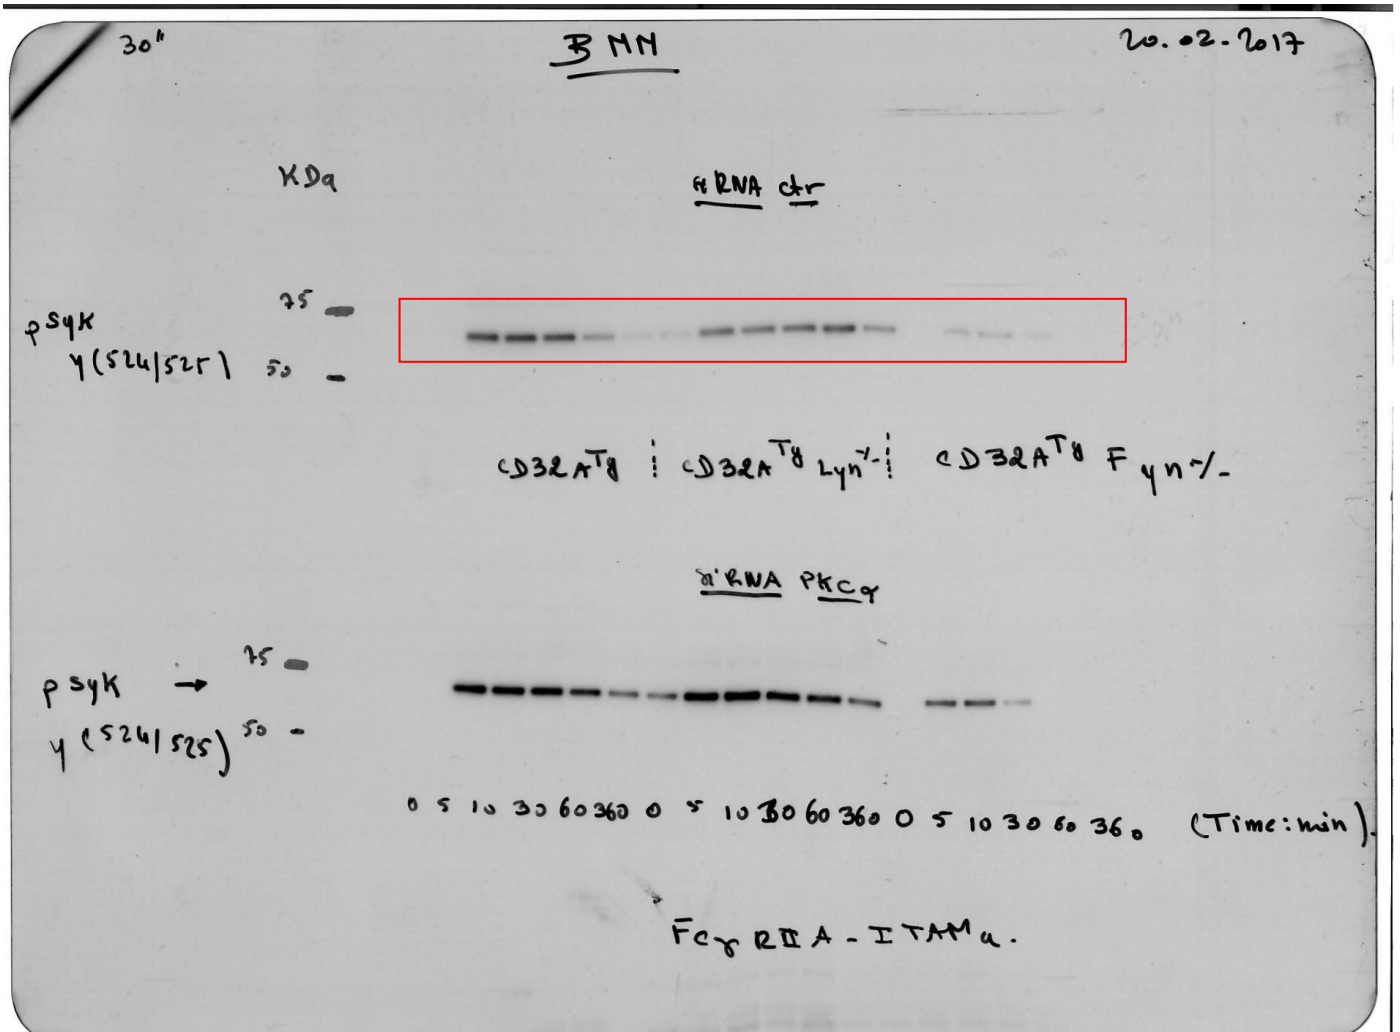

Supplementary Figure 3c  
 IB: pSyk<sup>Y525/526</sup> (PKC $\alpha$  siRNA)

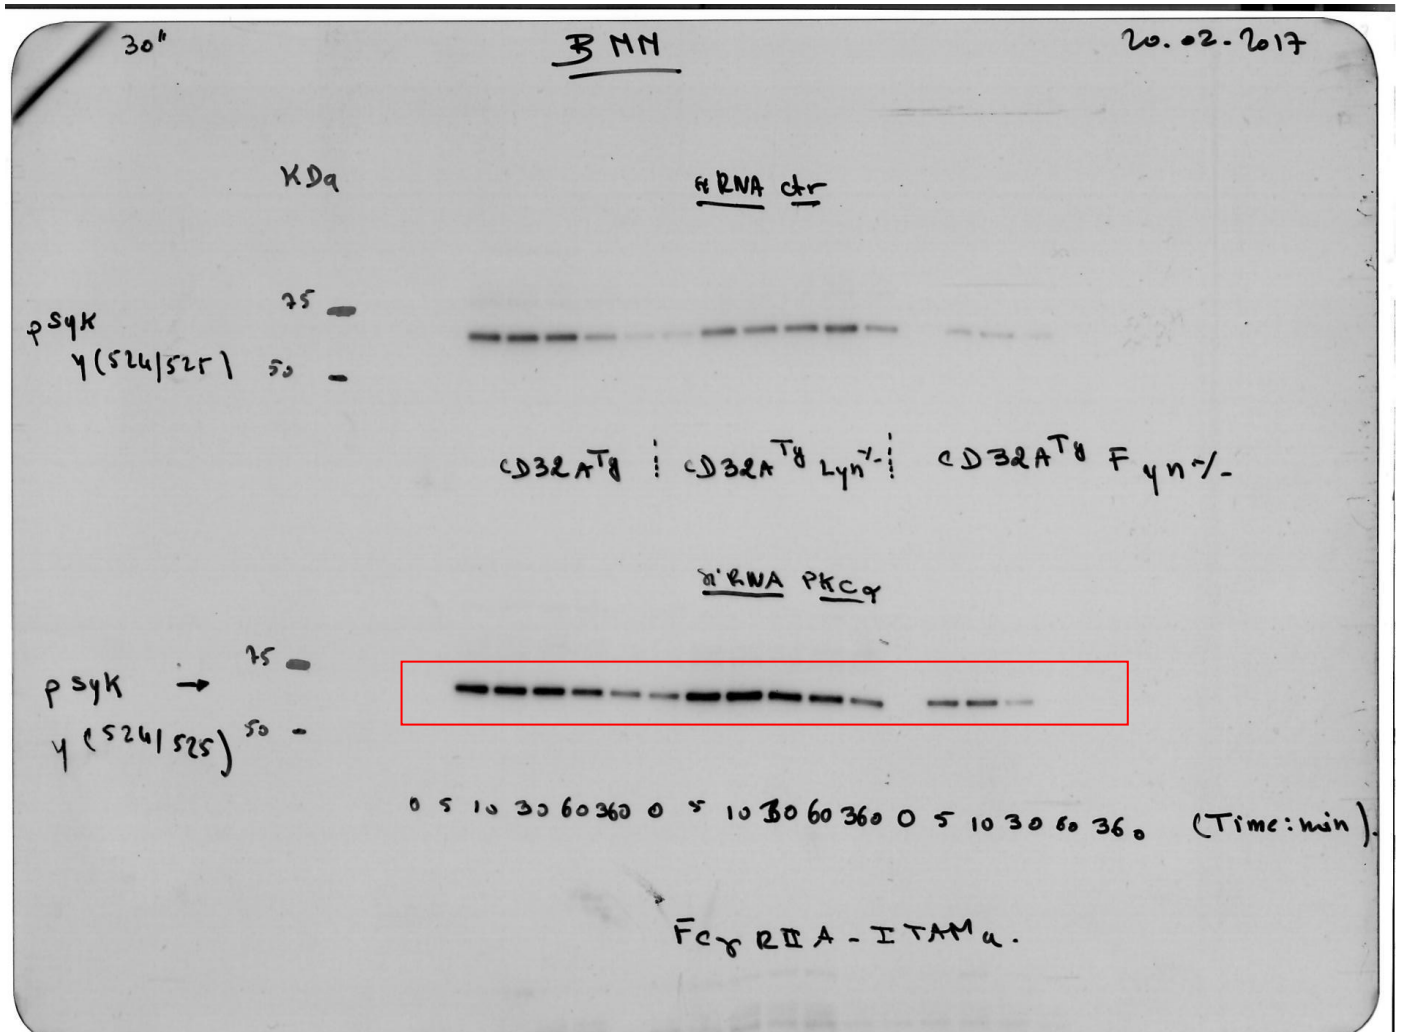

Supplementary Figure 3c

IB: Syk (PKC $\alpha$  siRNA)

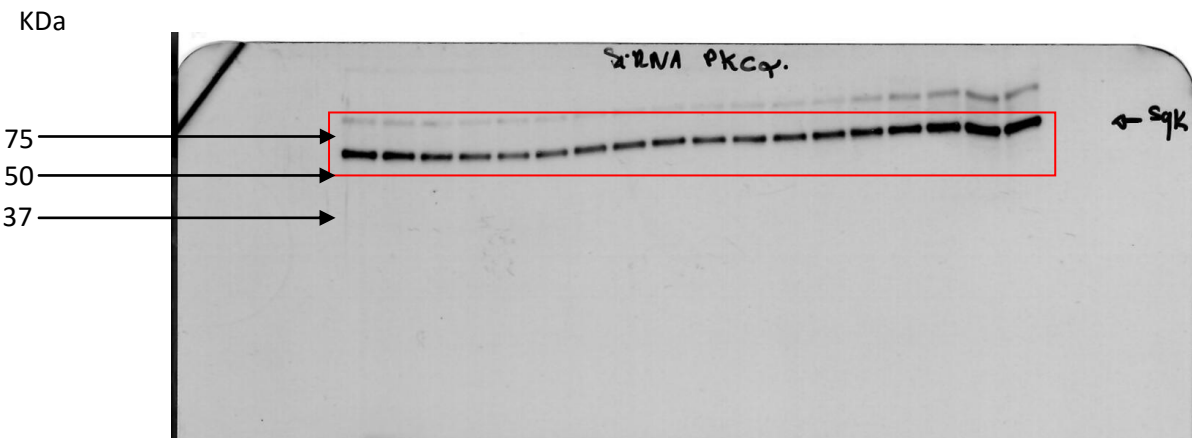

Supplementary Figure 3c

IB: PKC $\alpha$  (PKC $\alpha$  siRNA)

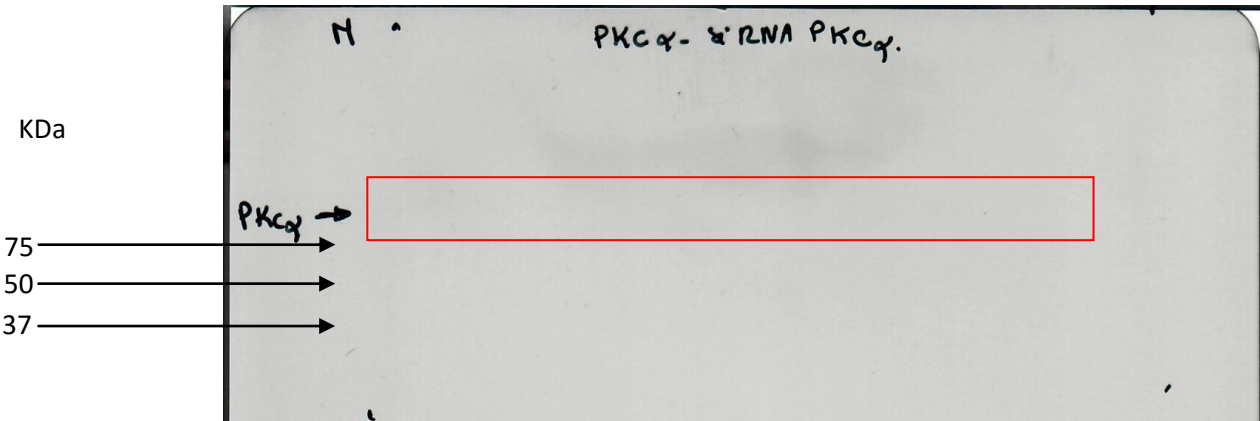



Supplementary Figure 3c

IB: PKC (Control siRNA)

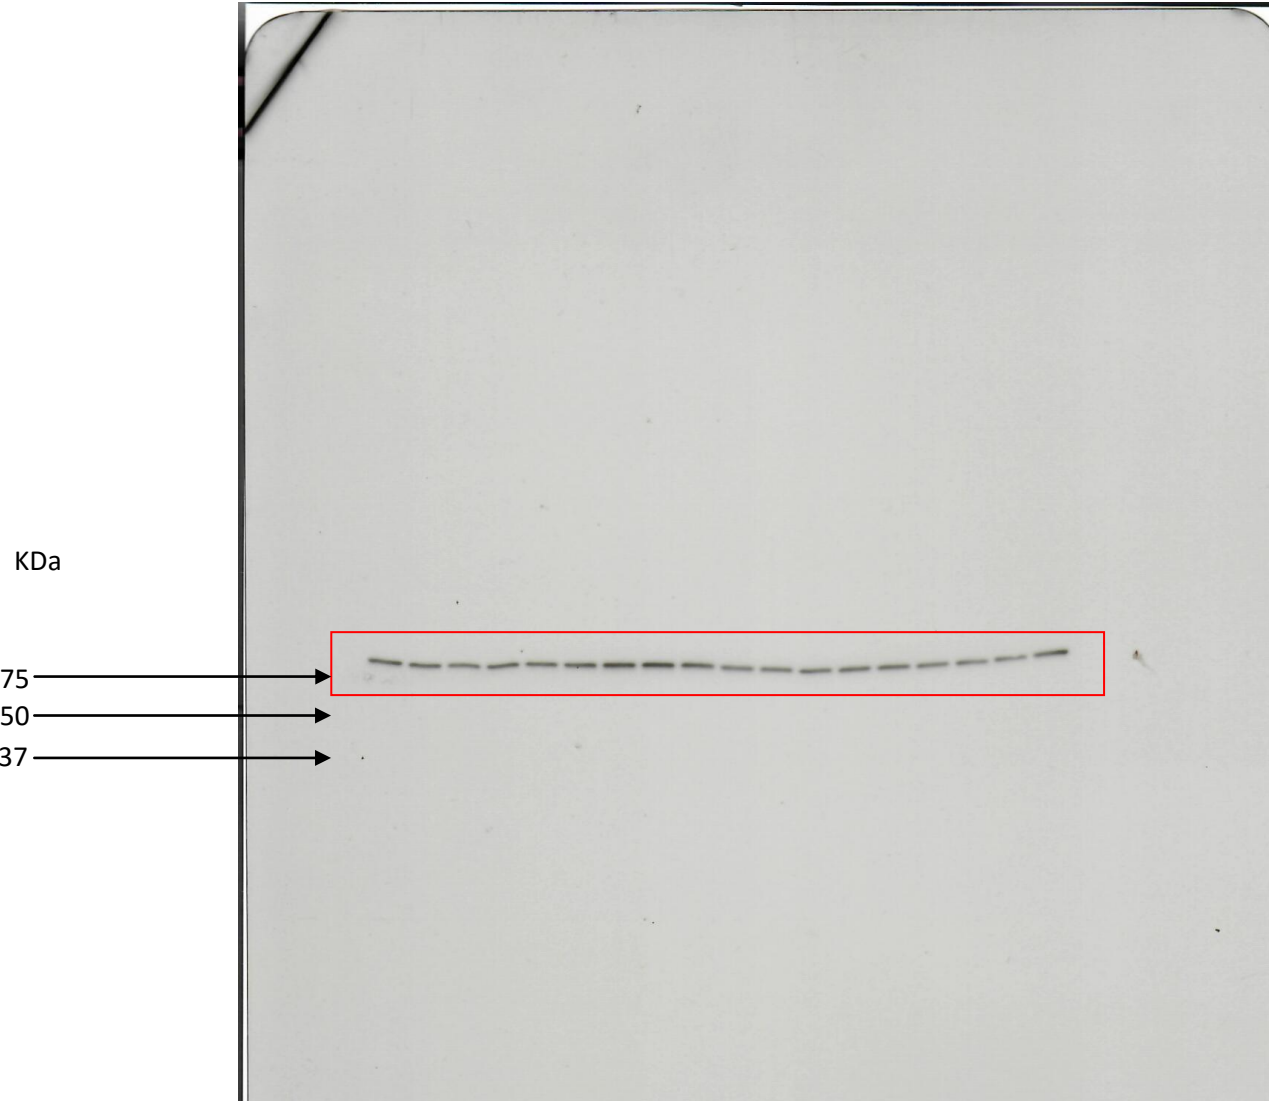

Supplementary Figure 3c

IB: Syk (Control siRNA)

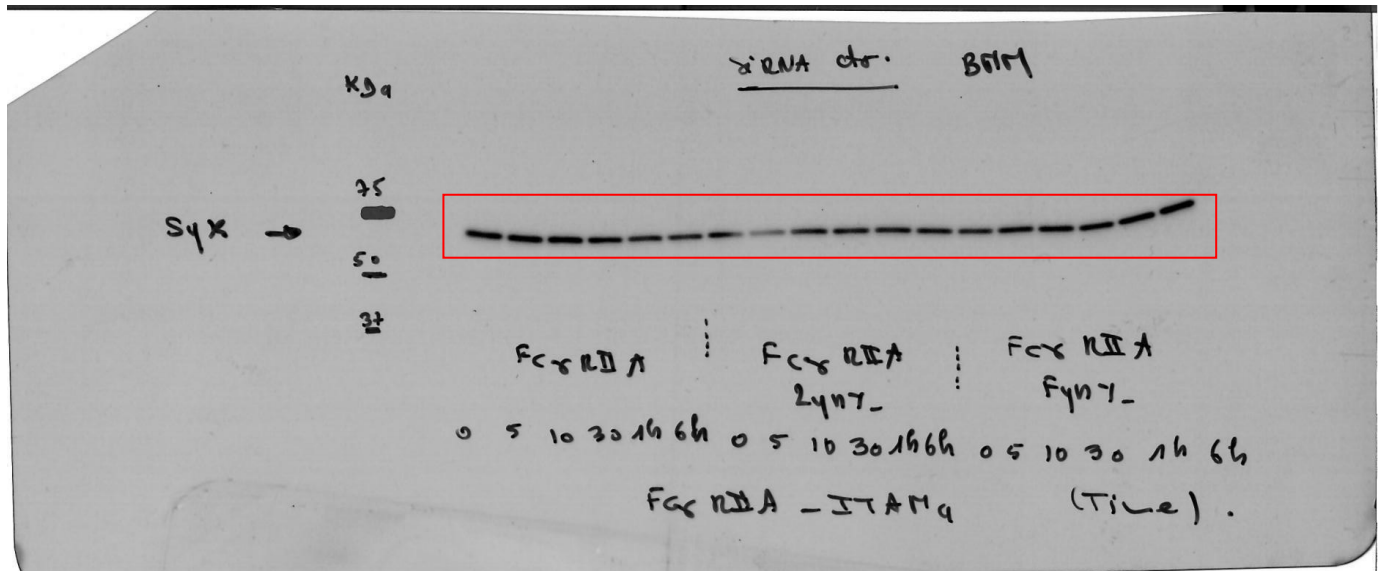

Supplementary Figure 3c

IB: Syk (PI3K inhibitor)

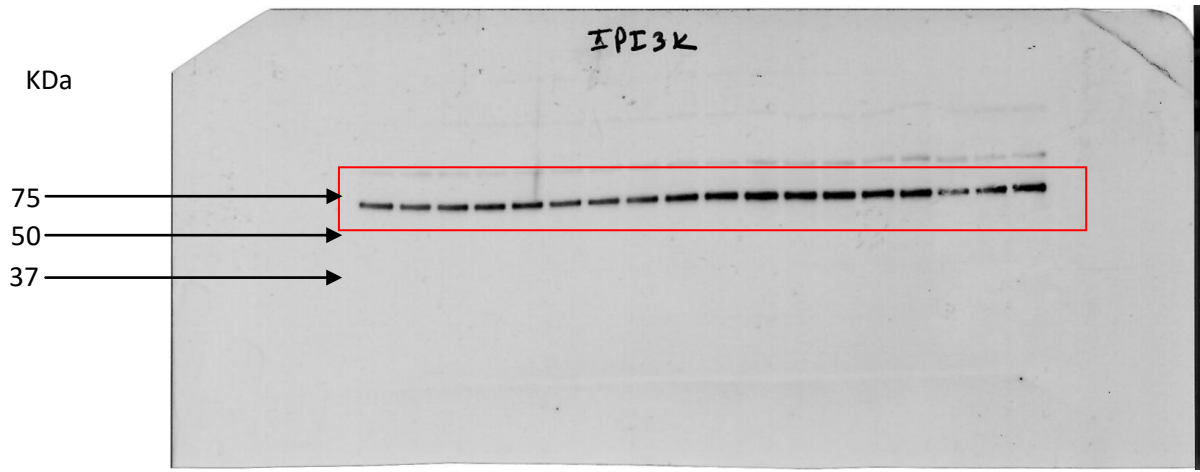

Supplementary Figure 4g

IB: actin

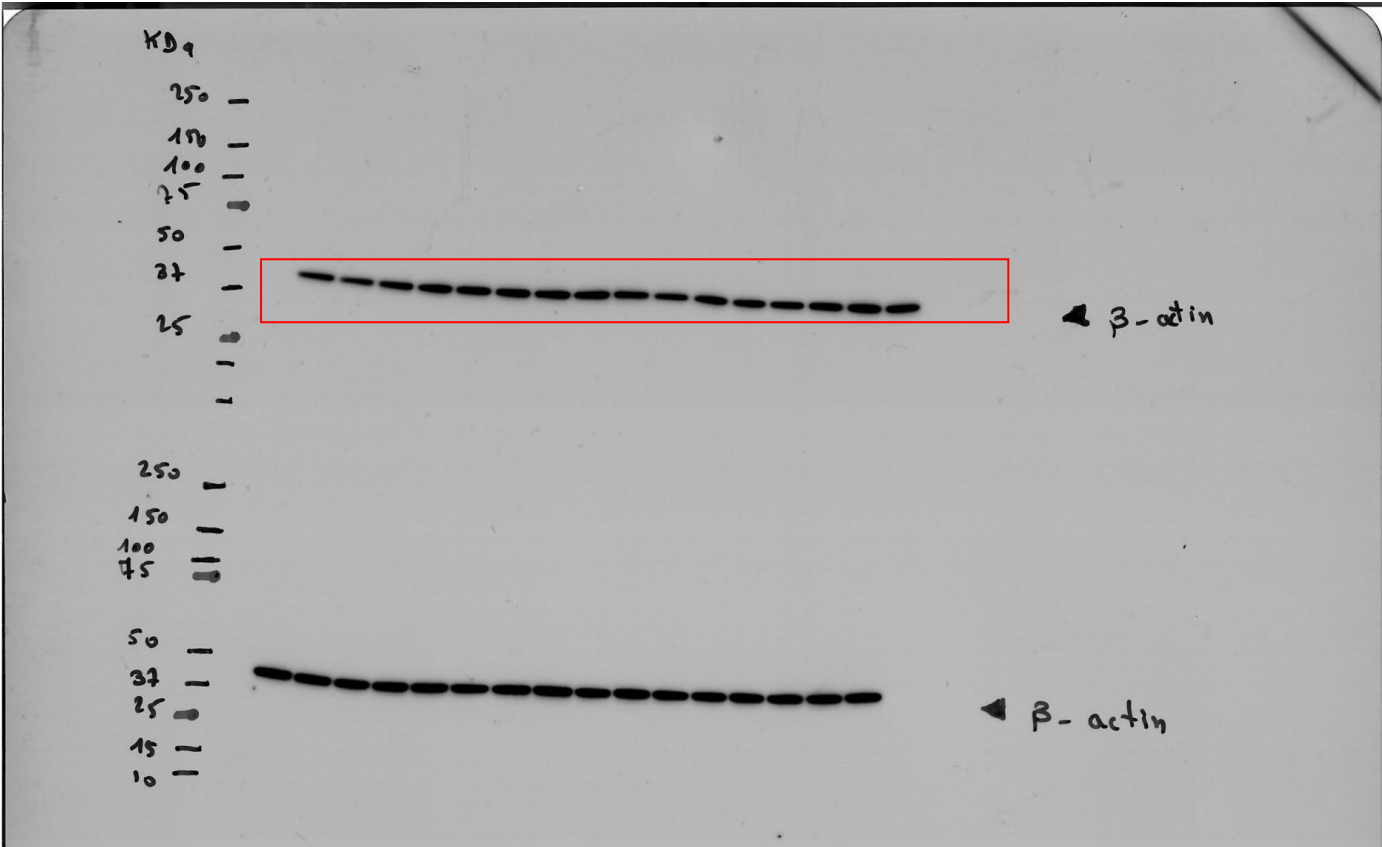

# Supplementary Figure 4f

IB: Fyn, right panel

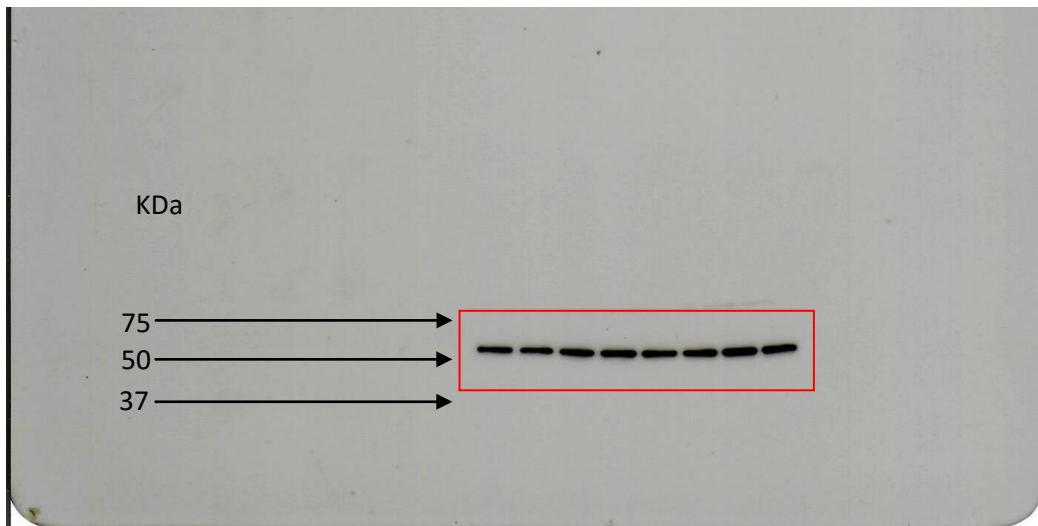

# Supplementary Figure 4f

IB: Lyn, right panel

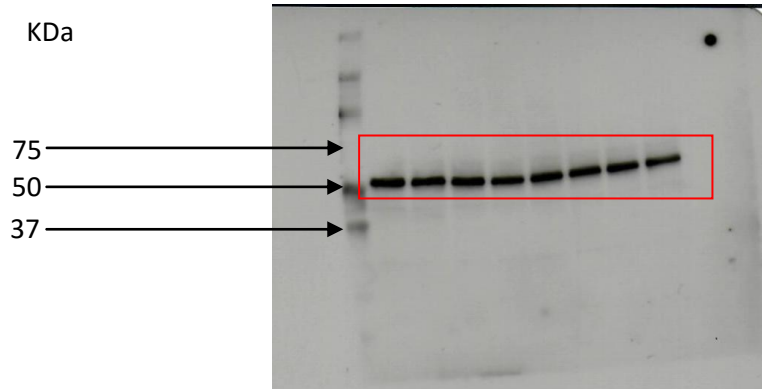

Supplementary Figure 4c

IB: Lyn, bottom panel

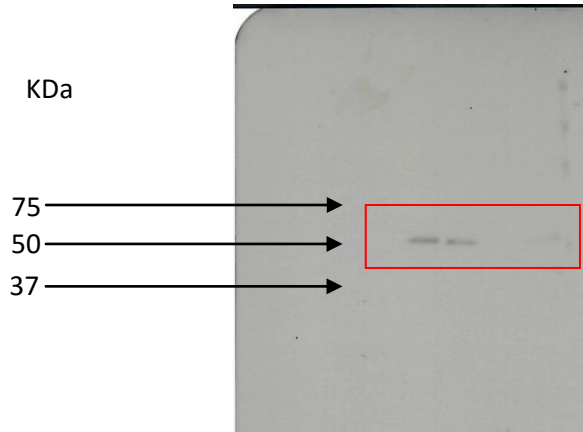

Supplementary Figure 4c

IB: Hck, bottom panel

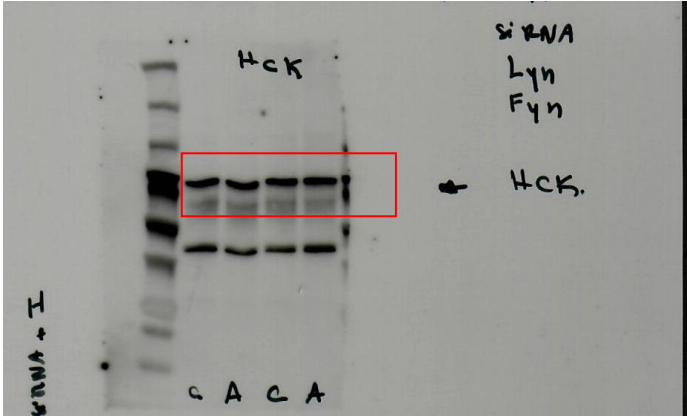



Supplementary Figure 4c

IB: Fgr, bottom panel

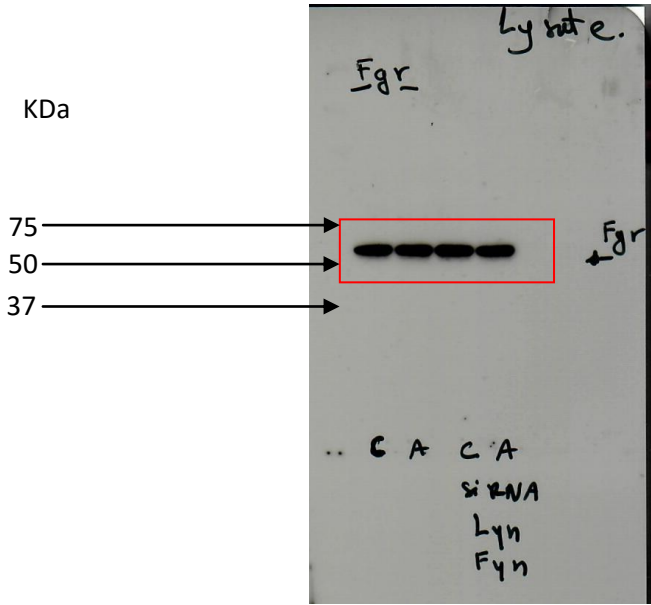

Supplementary Figure 4f

IB: Fyn, bottom panel

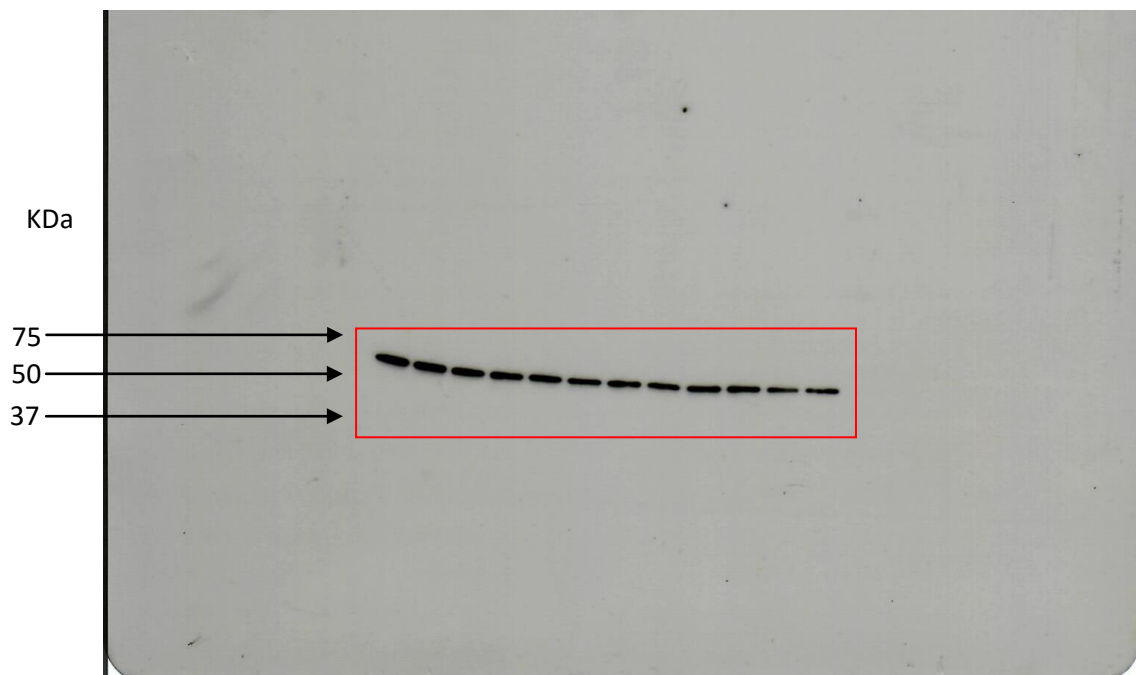

Supplementary Figure 4c

IB: Fyn, Top panel

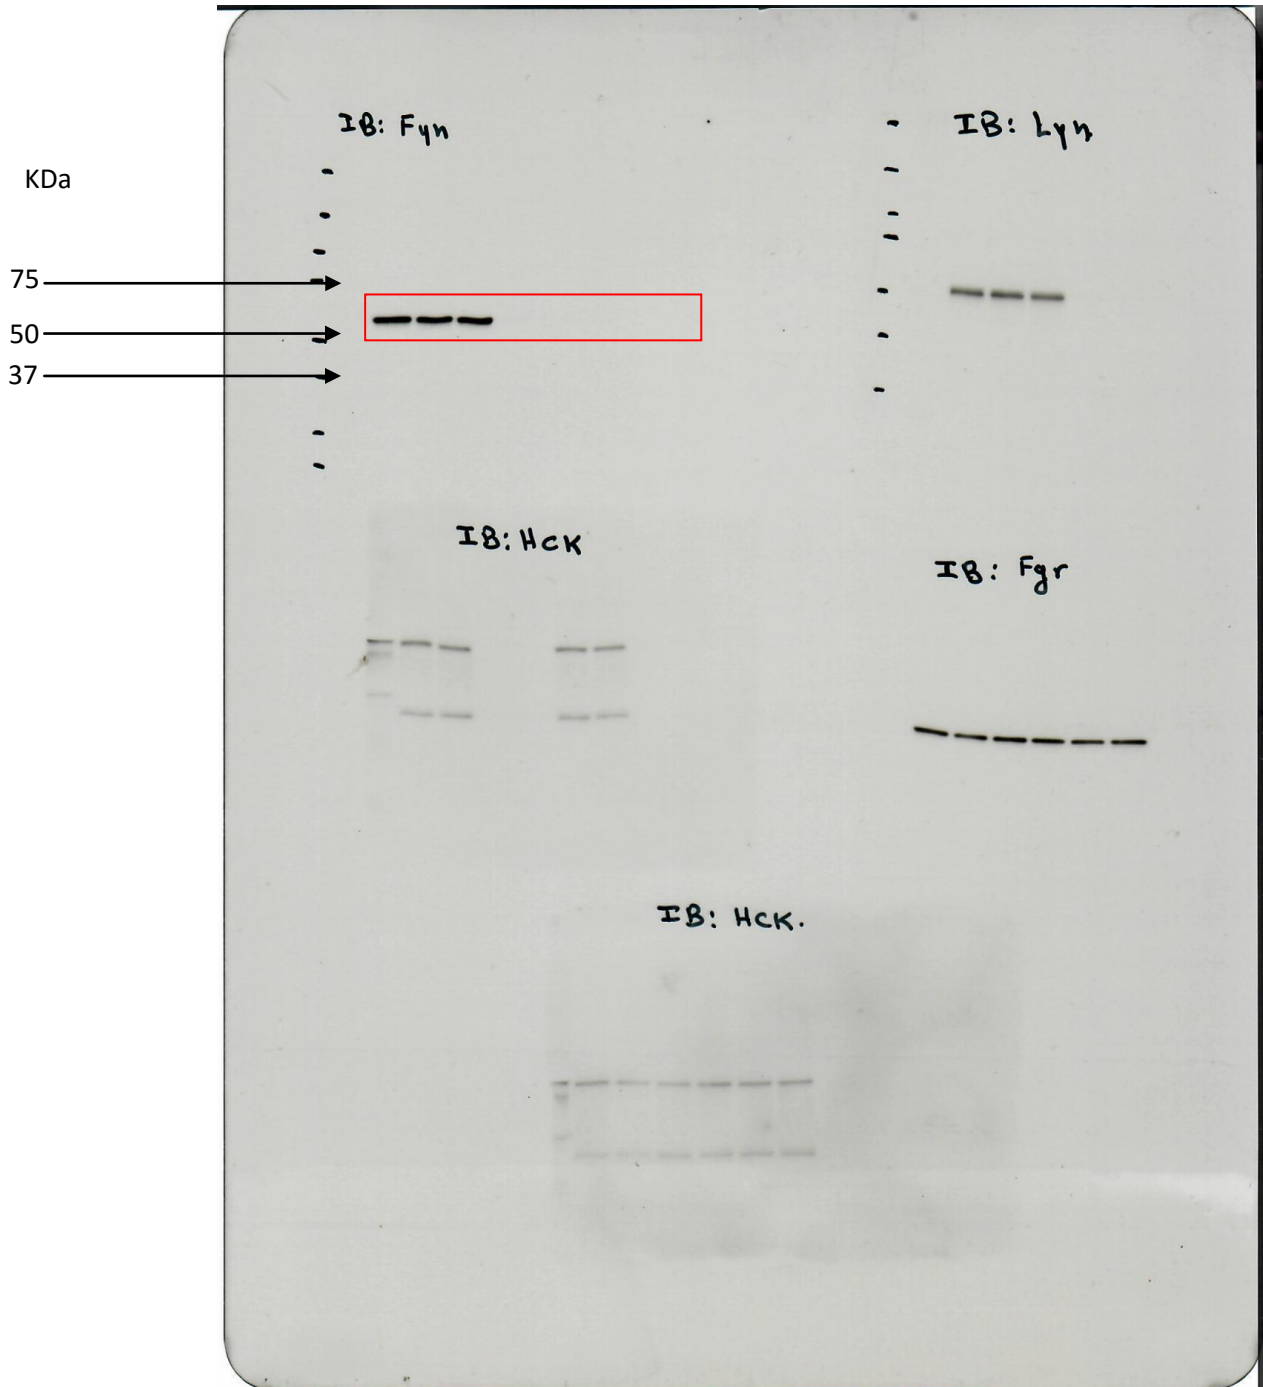

Supplementary Figure 4c

IB: Lyn, Top panel

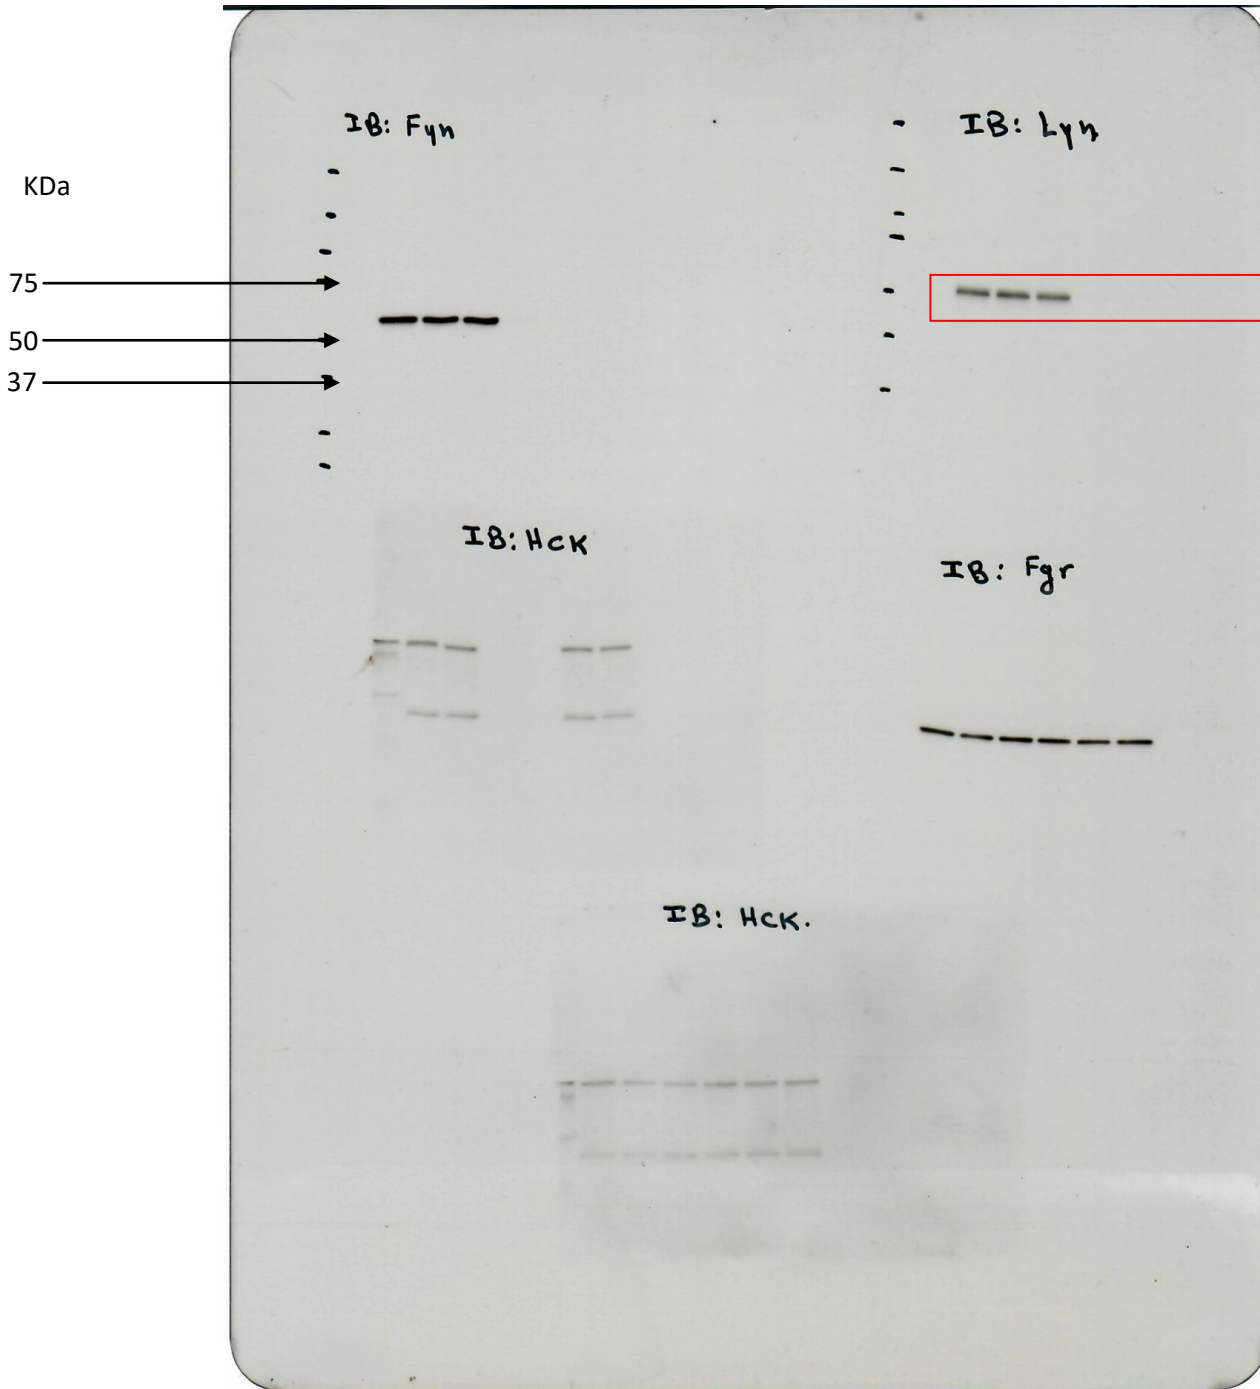

Supplementary Figure 4c

IB: Fgr, Top panel

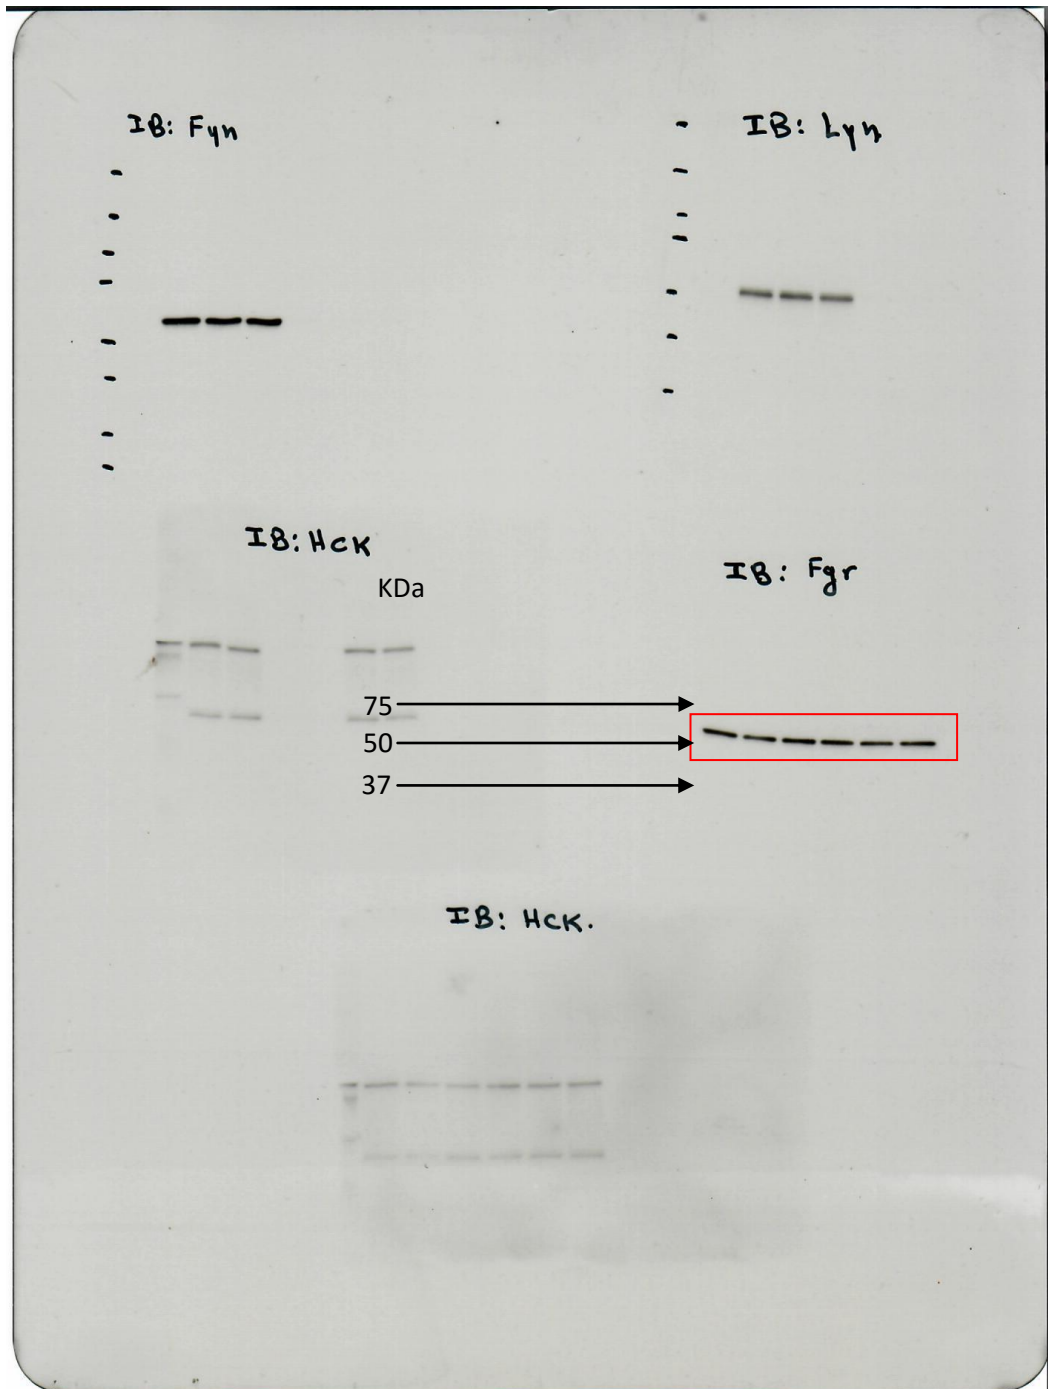

Supplementary Figure 4c

IB: Hck, Top panel

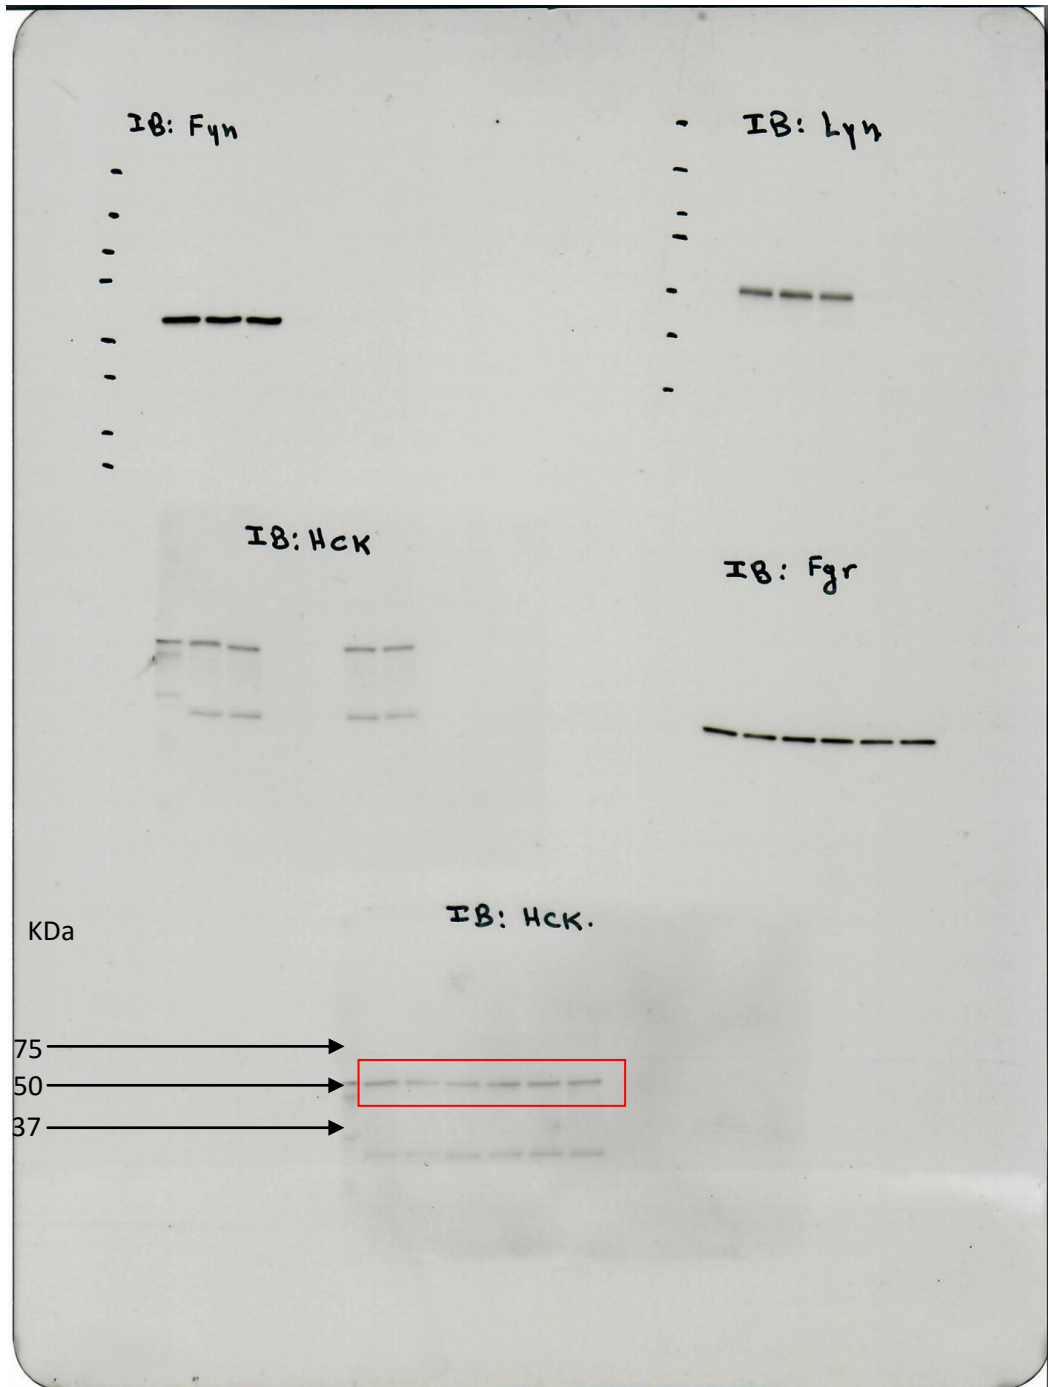

Supplementary Figure 4c

IB: Fyn, Bottom panel

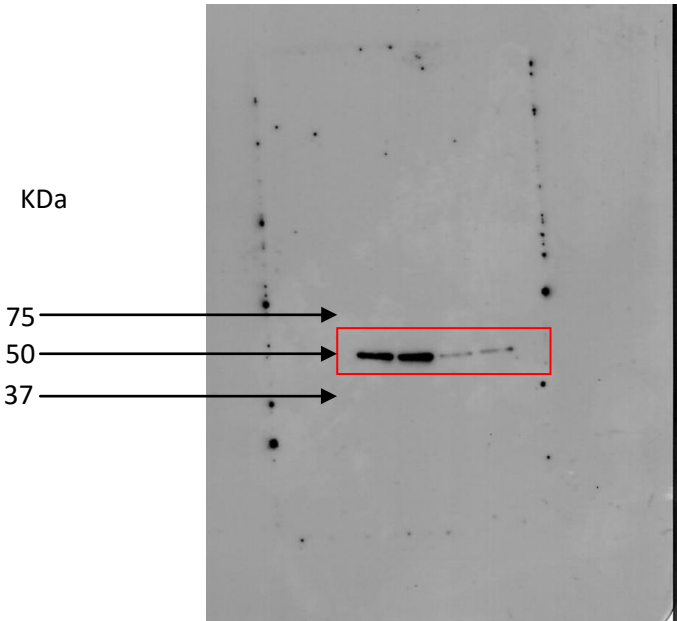

# Supplementary Figure 4f

IB: Hck, right panel

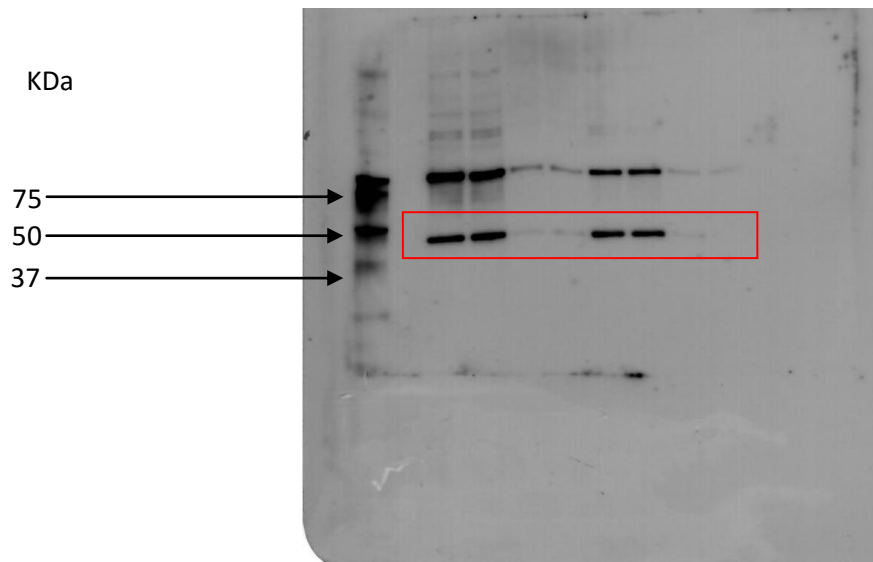



# Supplementary Figure 4f

IB: Lyn, left panel

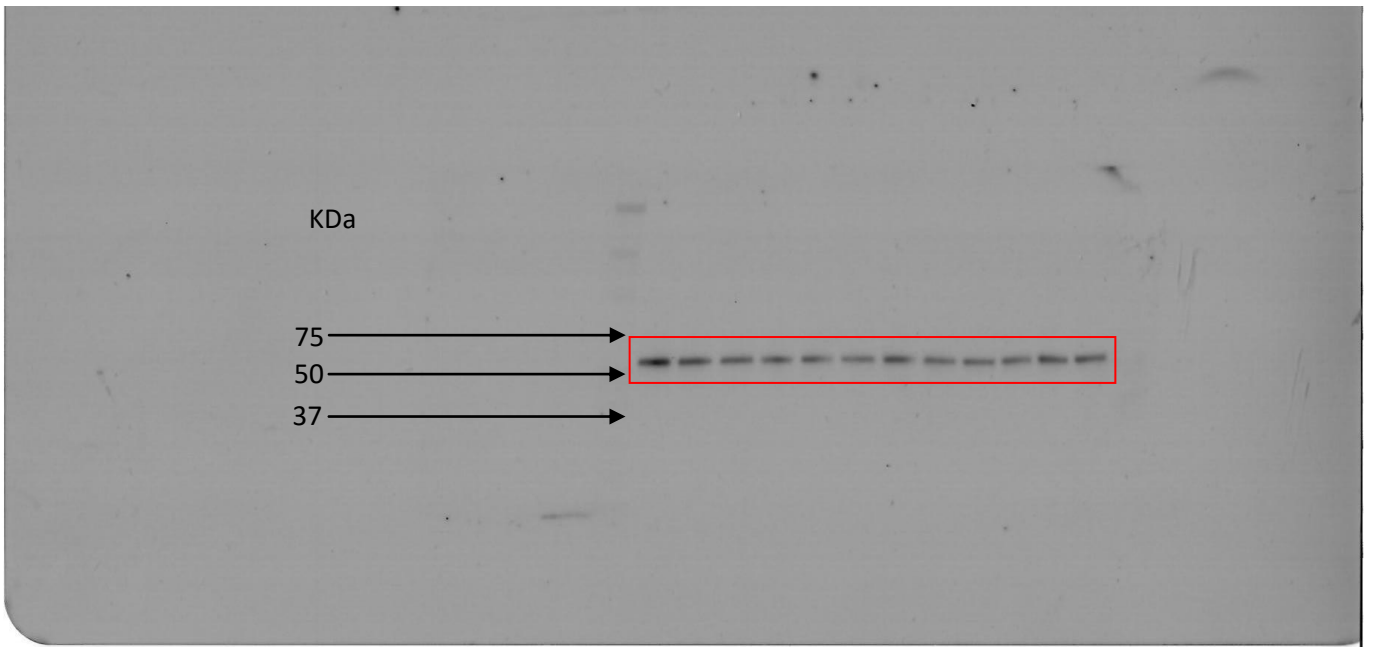

# Supplementary Figure 4f

IB: Fgr, left panel

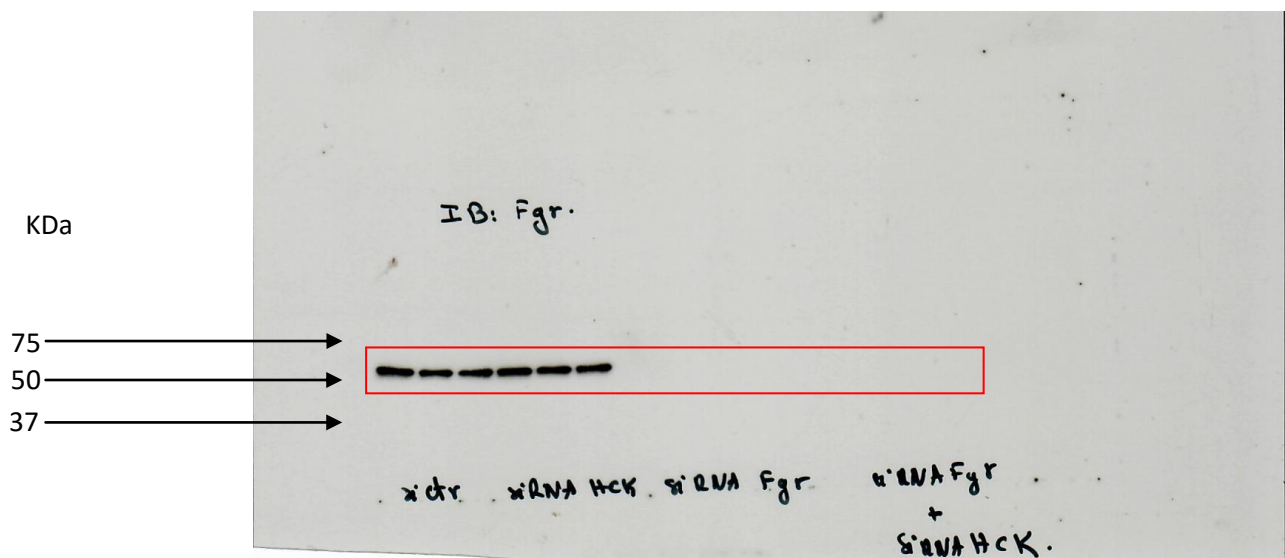

# Supplementary Figure 4f

IB: Fyn, right panel

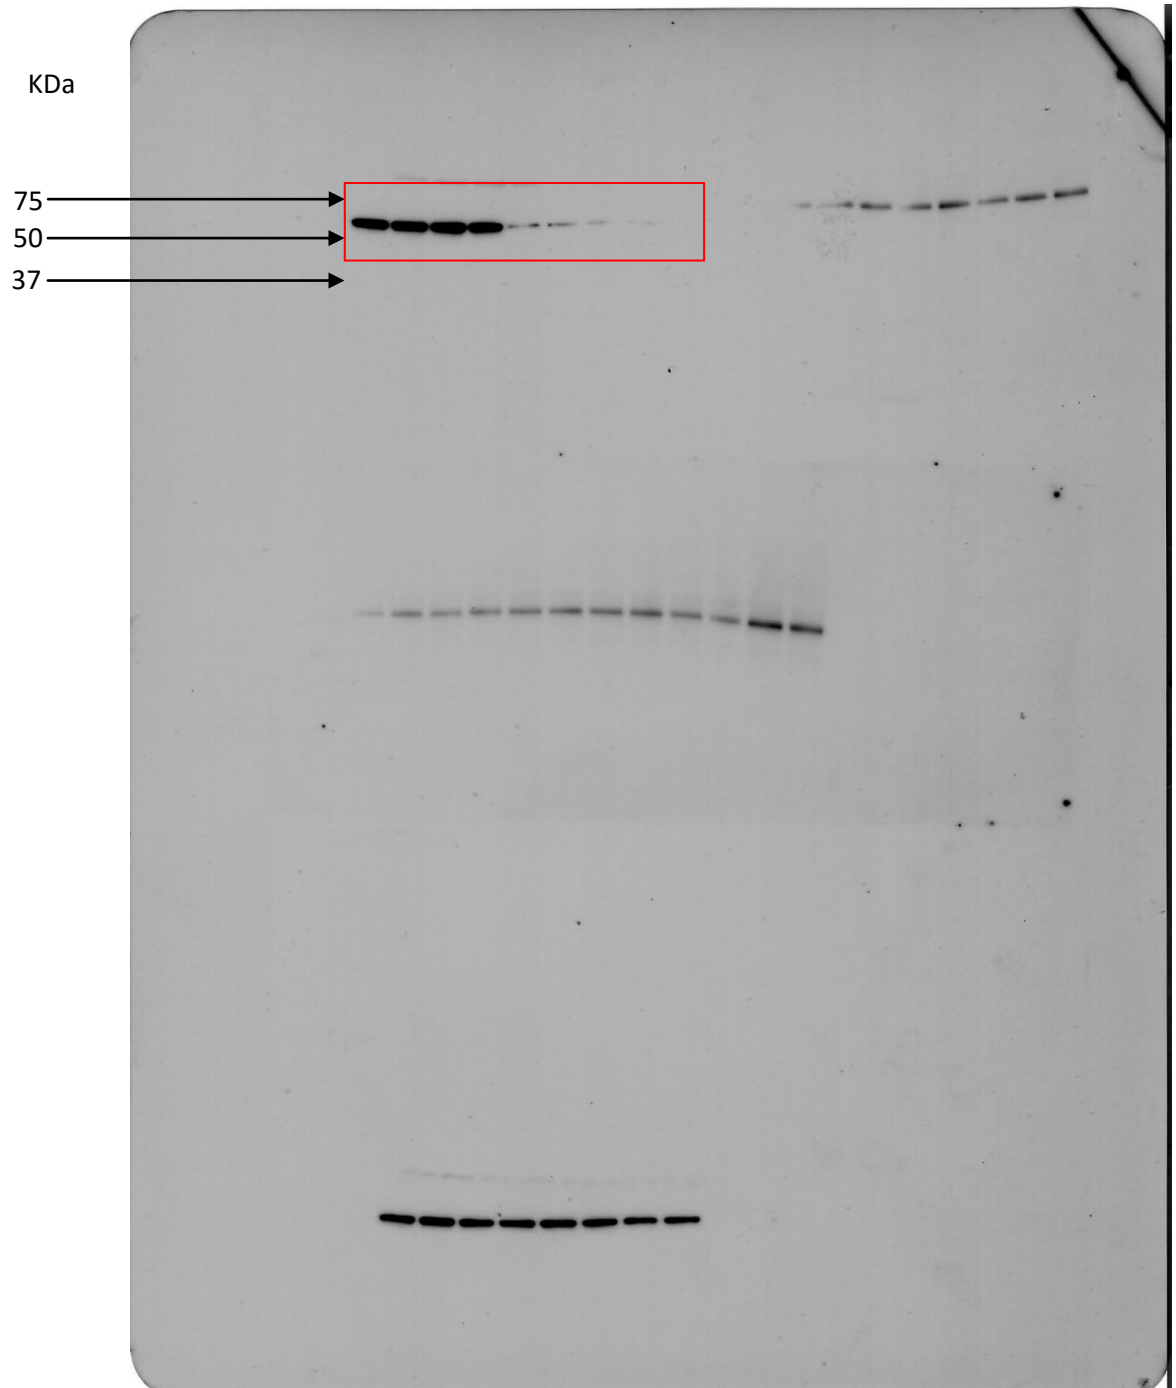

Supplementary Figure 4f

IB: Hck, left panel

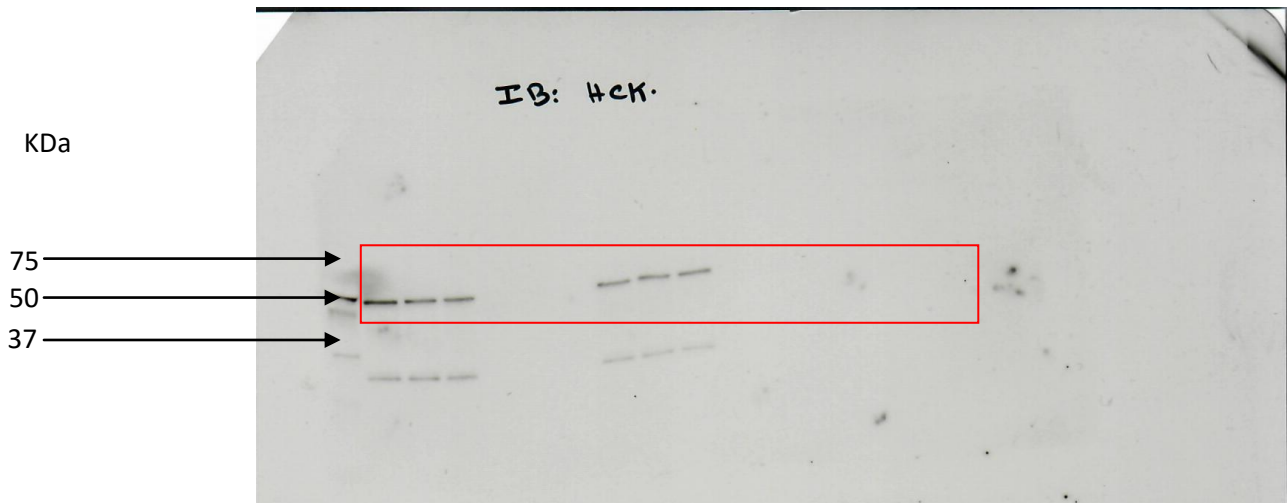

# Supplementary Figure 4h

IB: actin

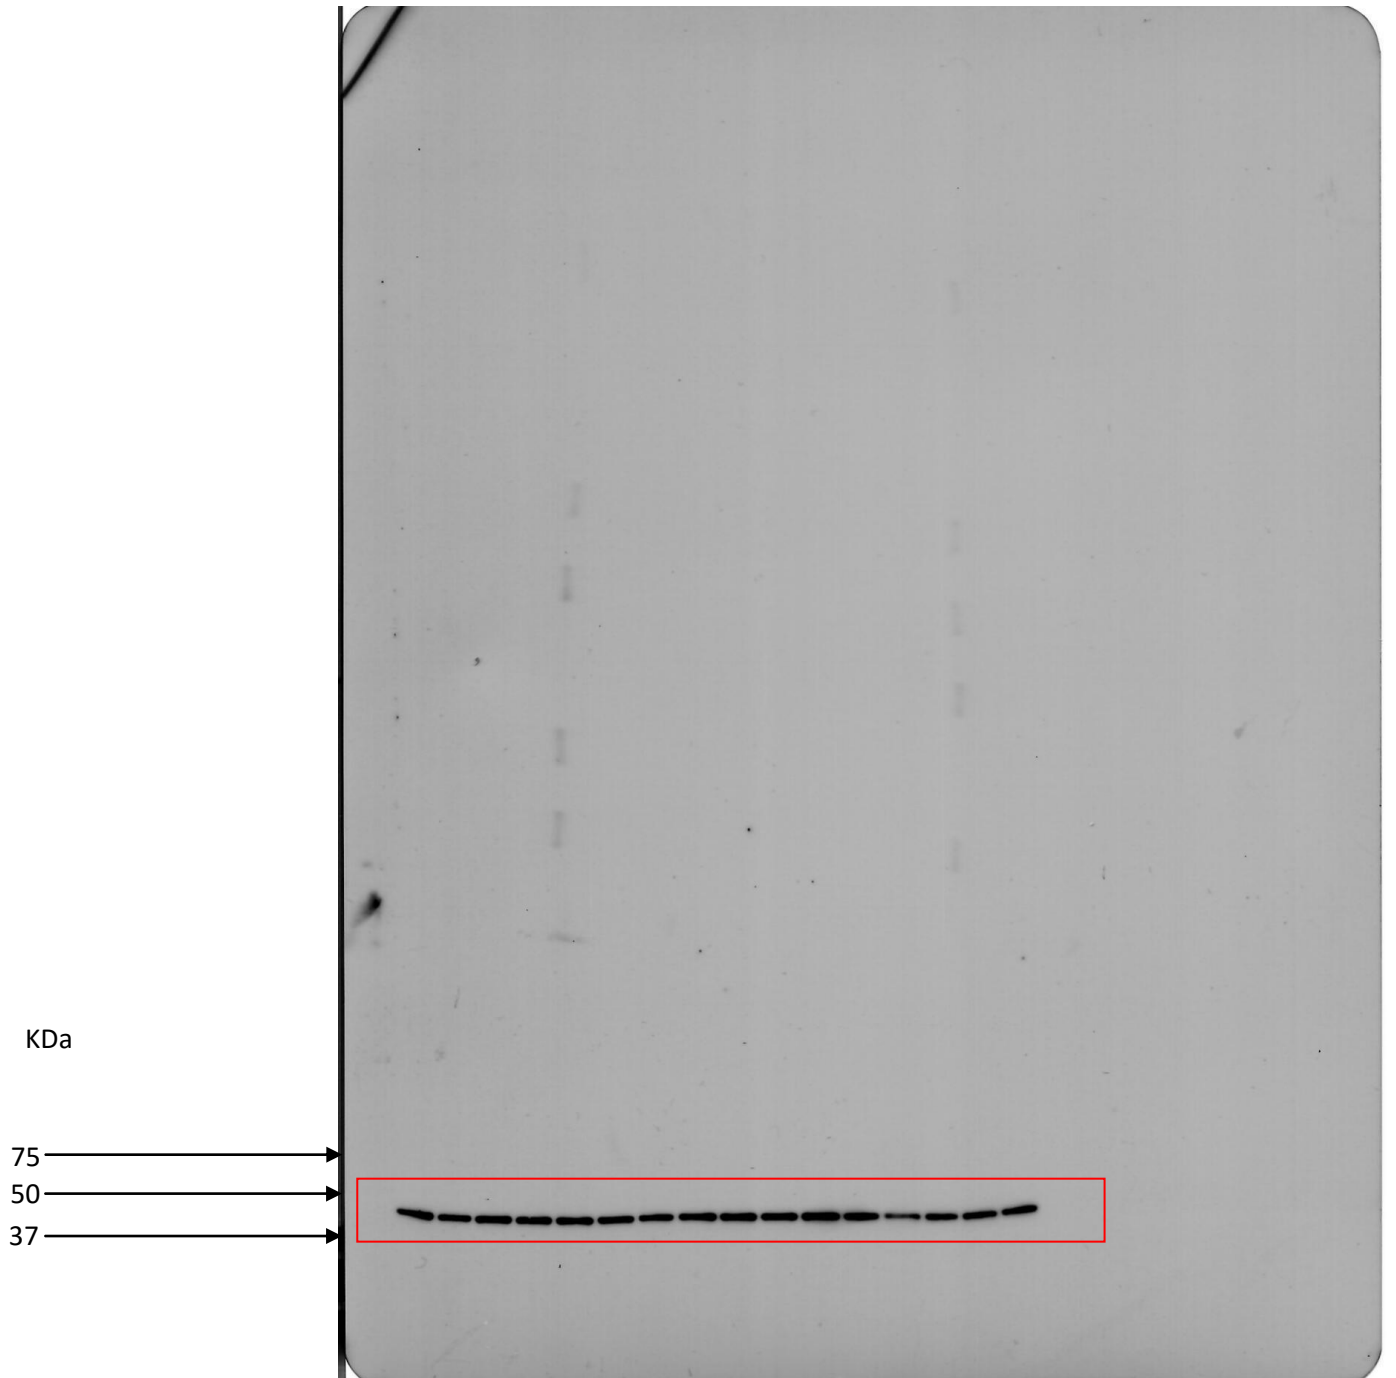

# Supplementary Figure 5a

IB: SHP-1 (SHP-1 siRNA)

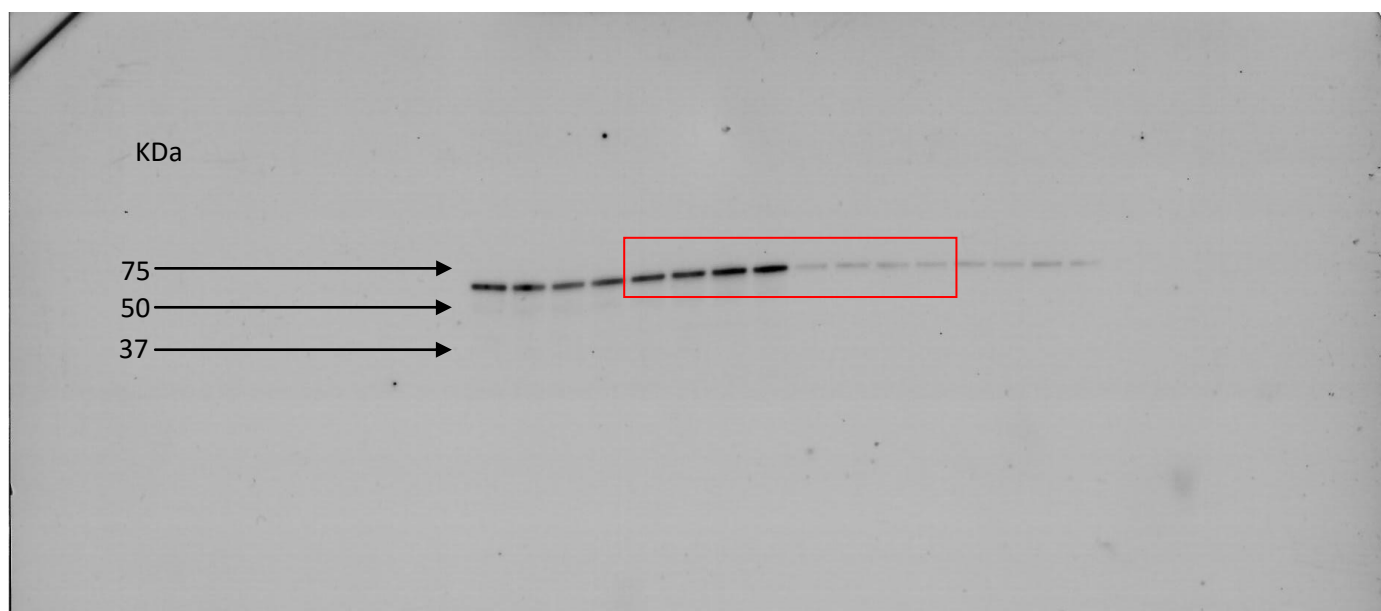

Supplementary Figure 5a

IB: actin (SHP-1 siRNA)

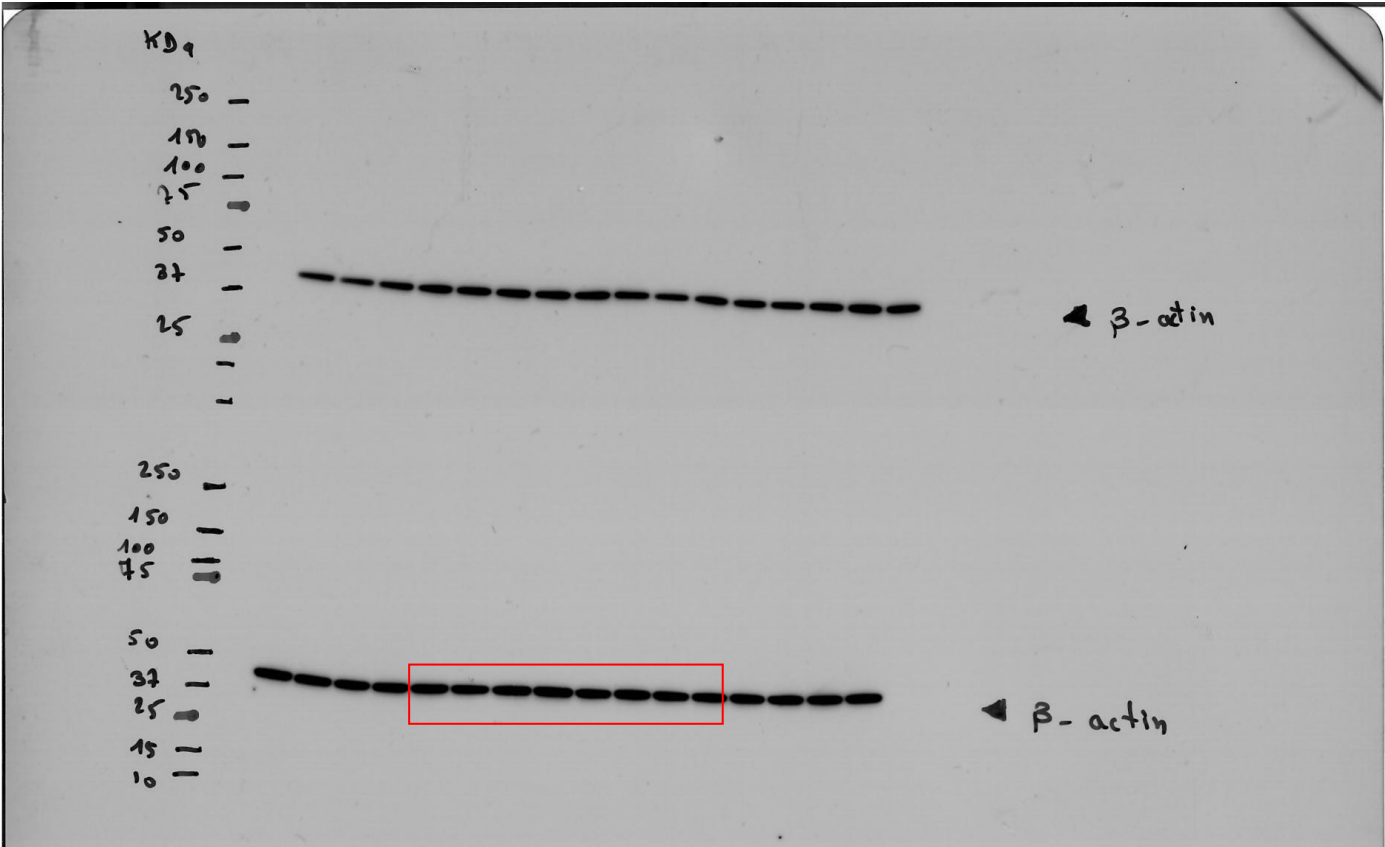

# Supplementary Figure 5b

IB: SHP-1 (Vehicle)

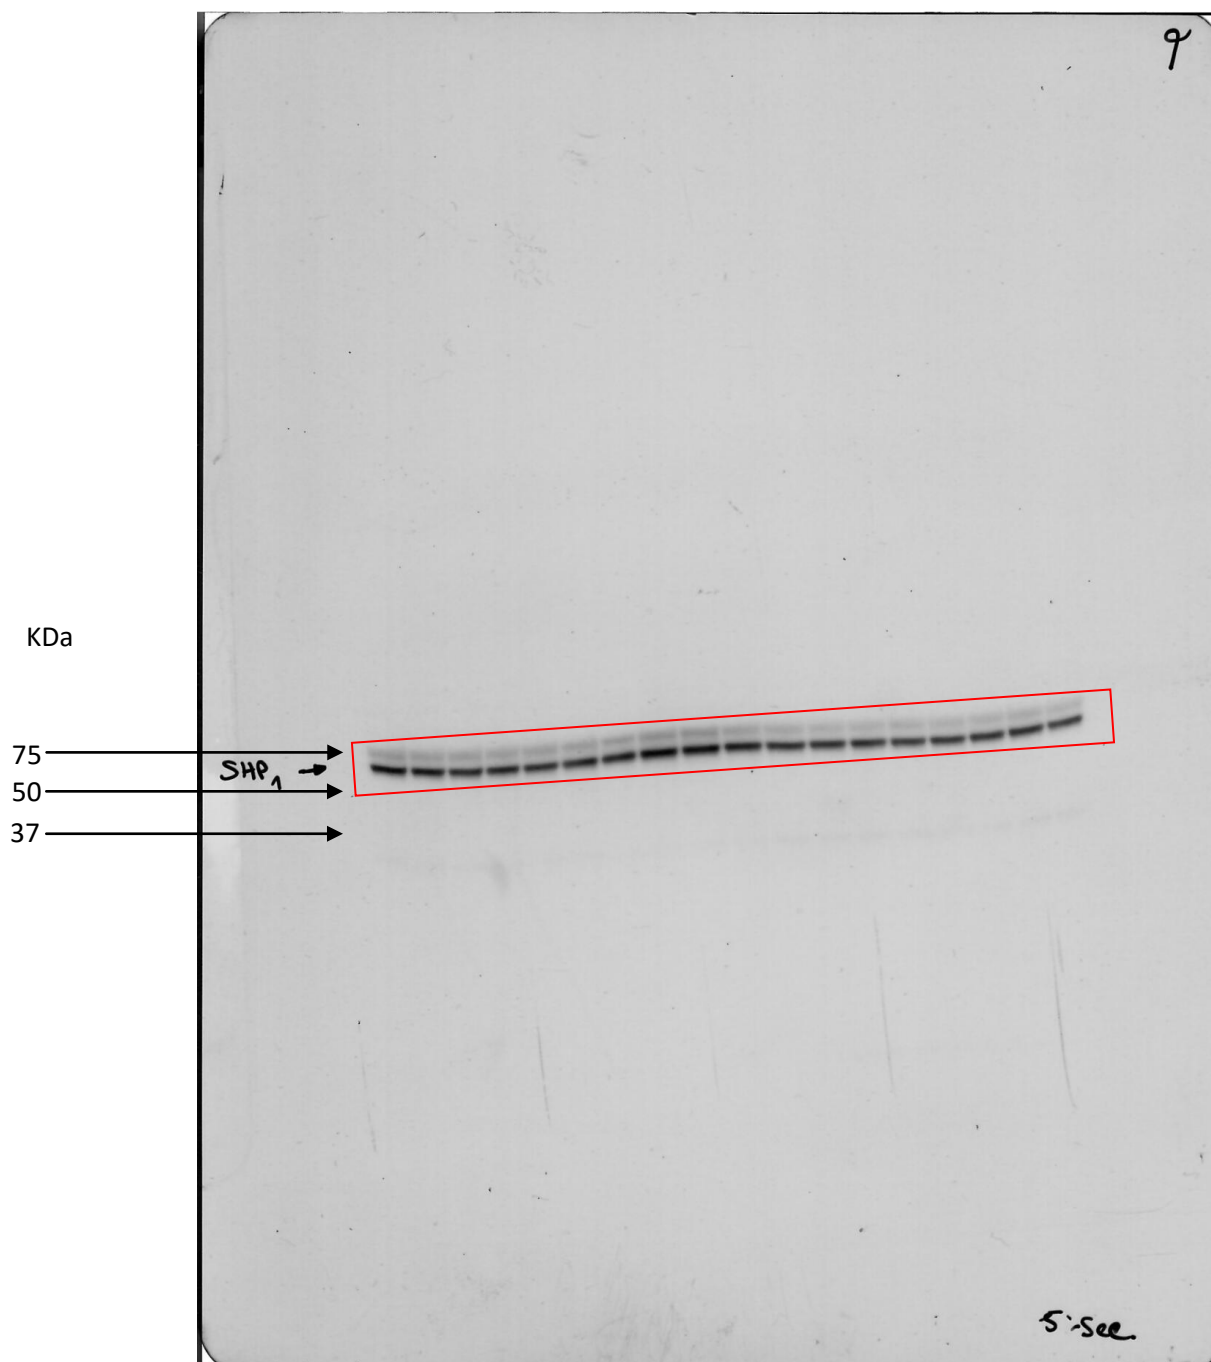



# Supplementary Figure 5b

IB: SHP-1 (ERK inhibitor)

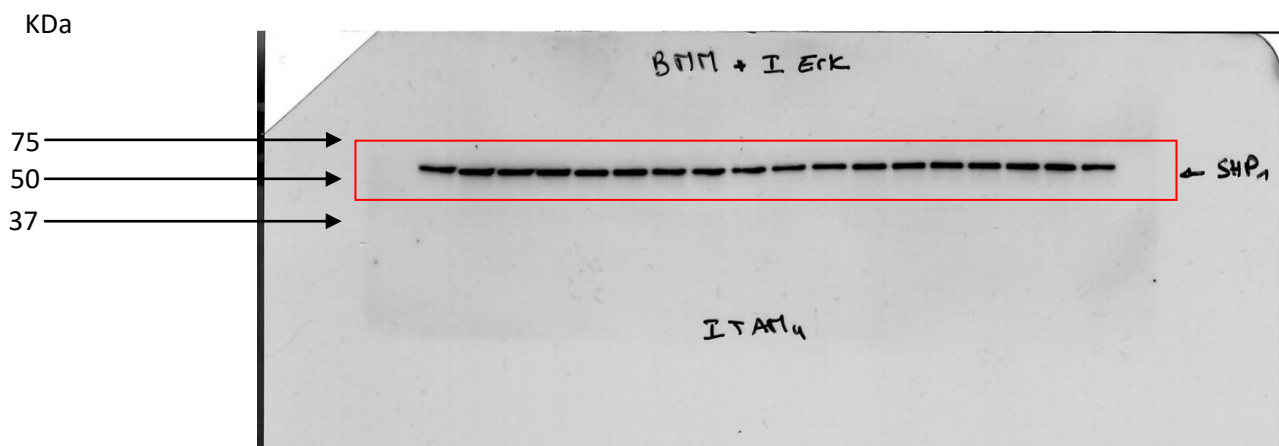

# Supplementary Figure 5b

IB: SHP-1 (PI3K inhibitor)

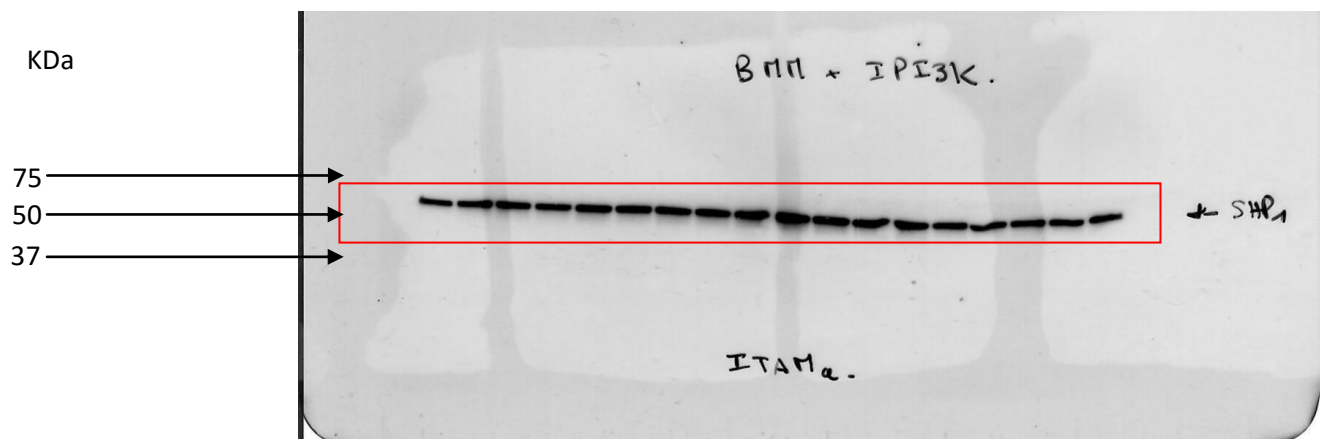

Supplementary Figure 5b

IB: PKC (PKC inhibitor)

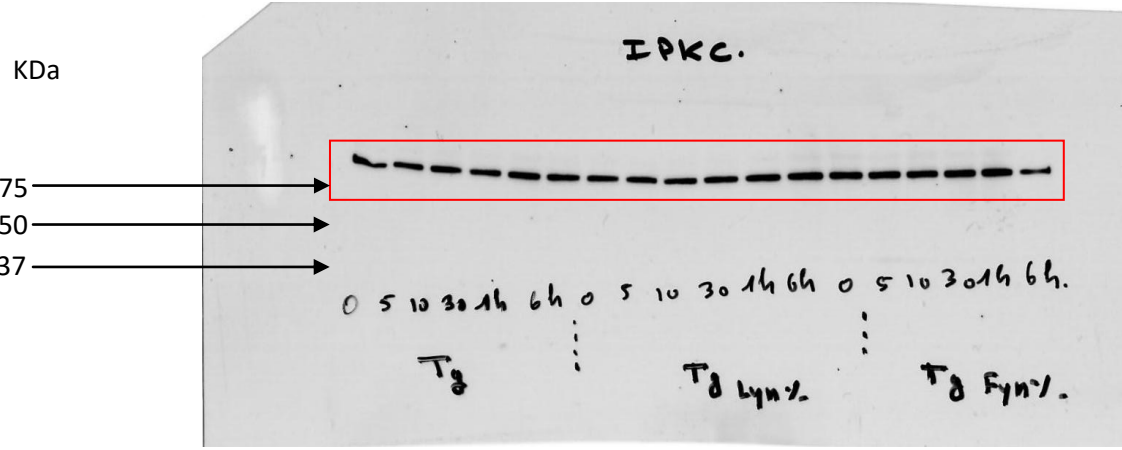

Supplementary Figure 5b

IB: AKT (PKC inhibitor)

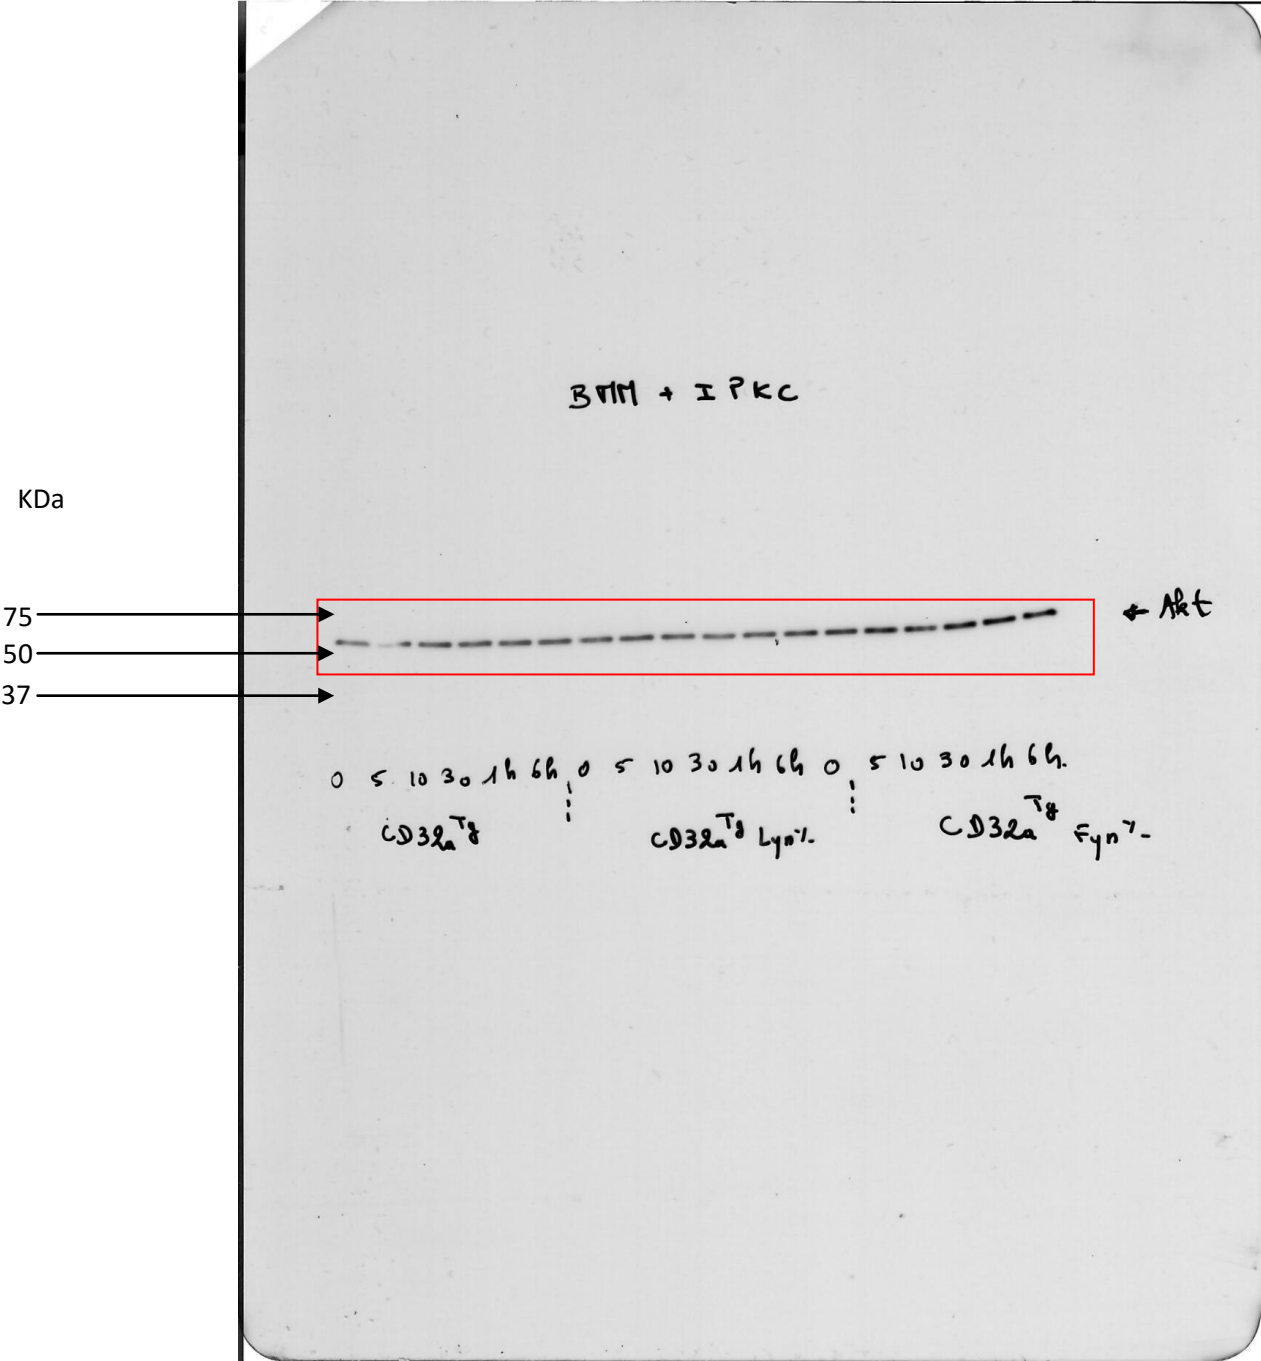

# Supplementary Figure 5b

IB: AKT (PI3K inhibitor)

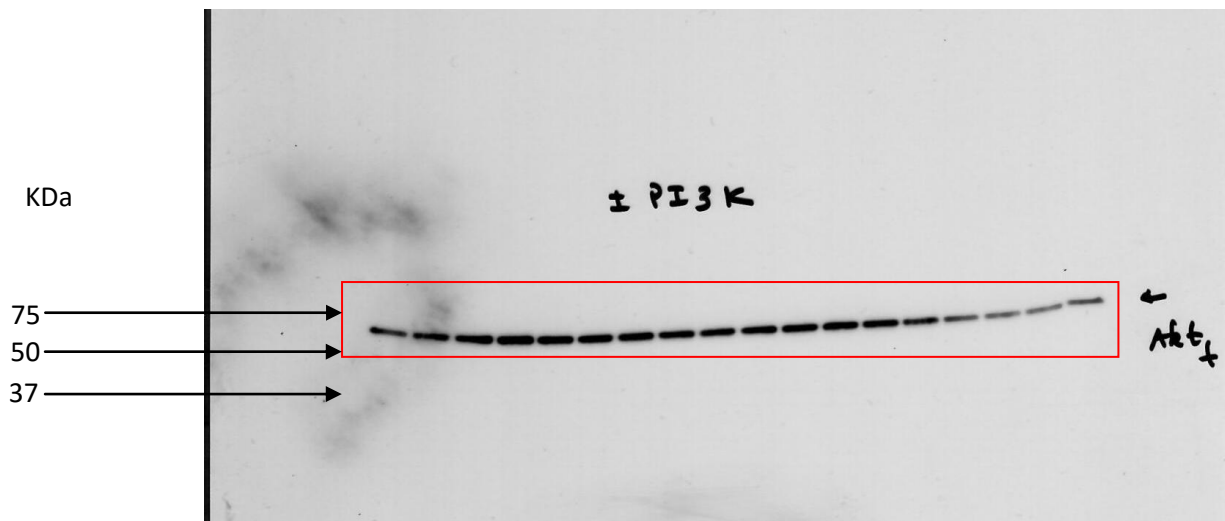

Supplementary Figure 5b

IB: PKC (PI3K inhibitor)

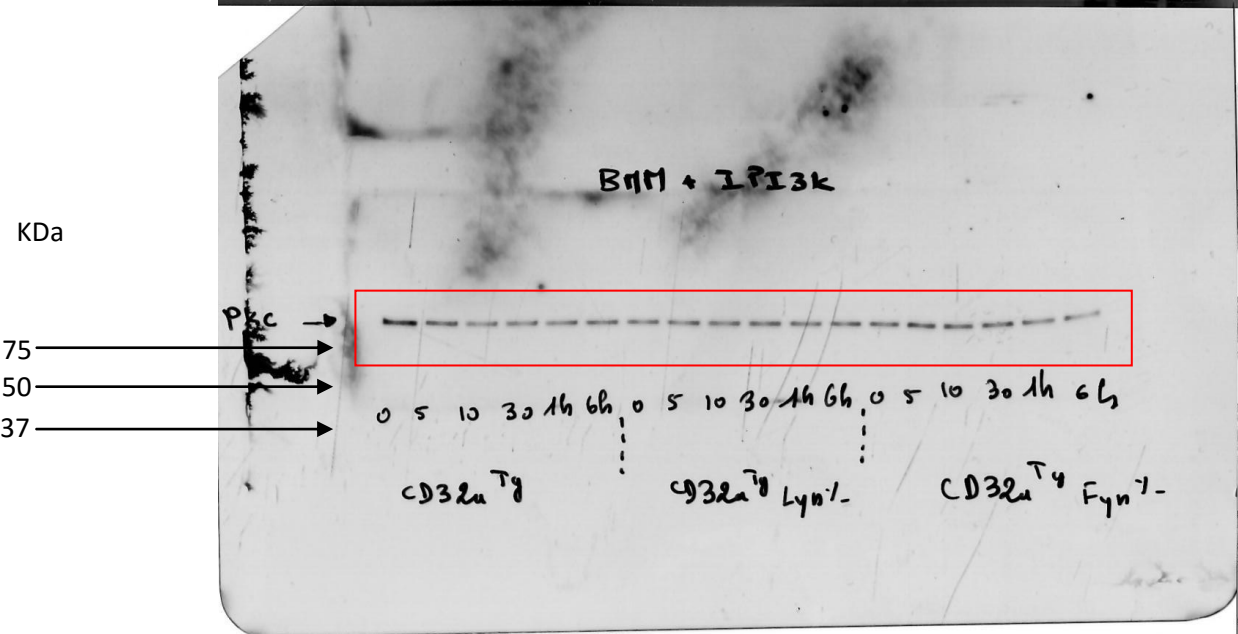

# Supplementary Figure 5b

IB: ERK (Vehicle)

KDa

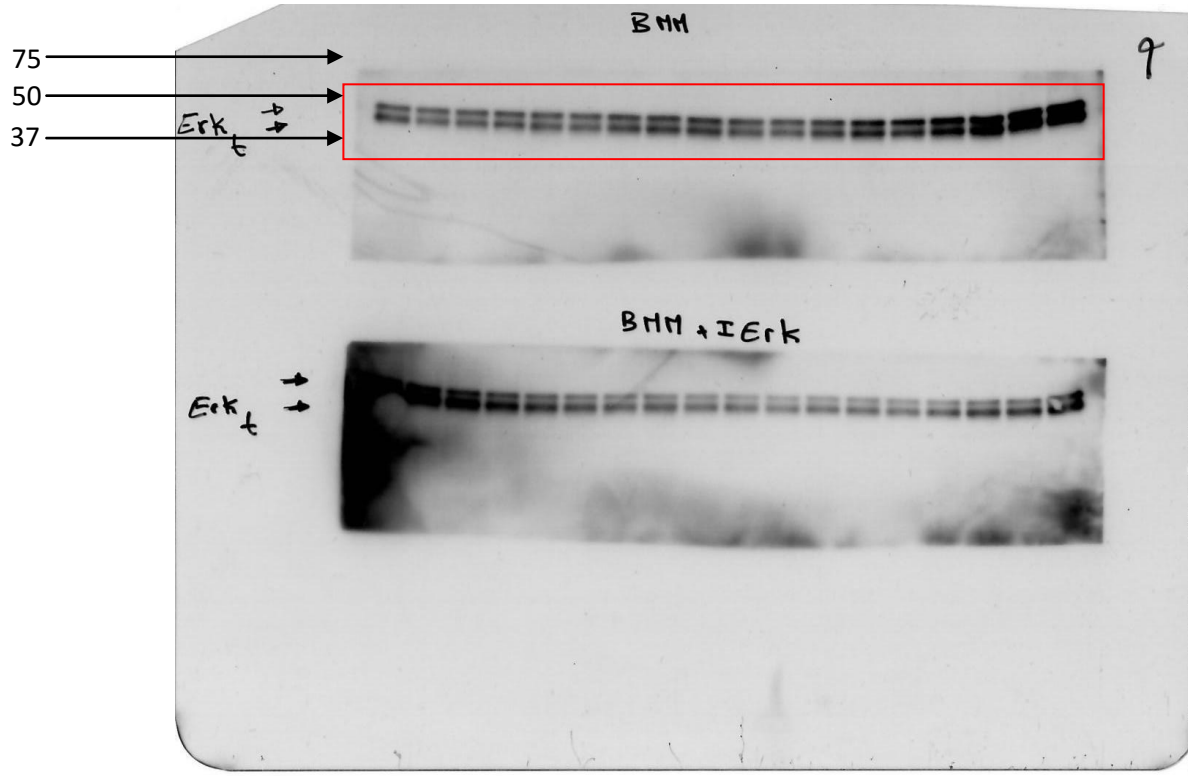

Supplementary Figure 5b

IB: ERK (ERK inhibitor)

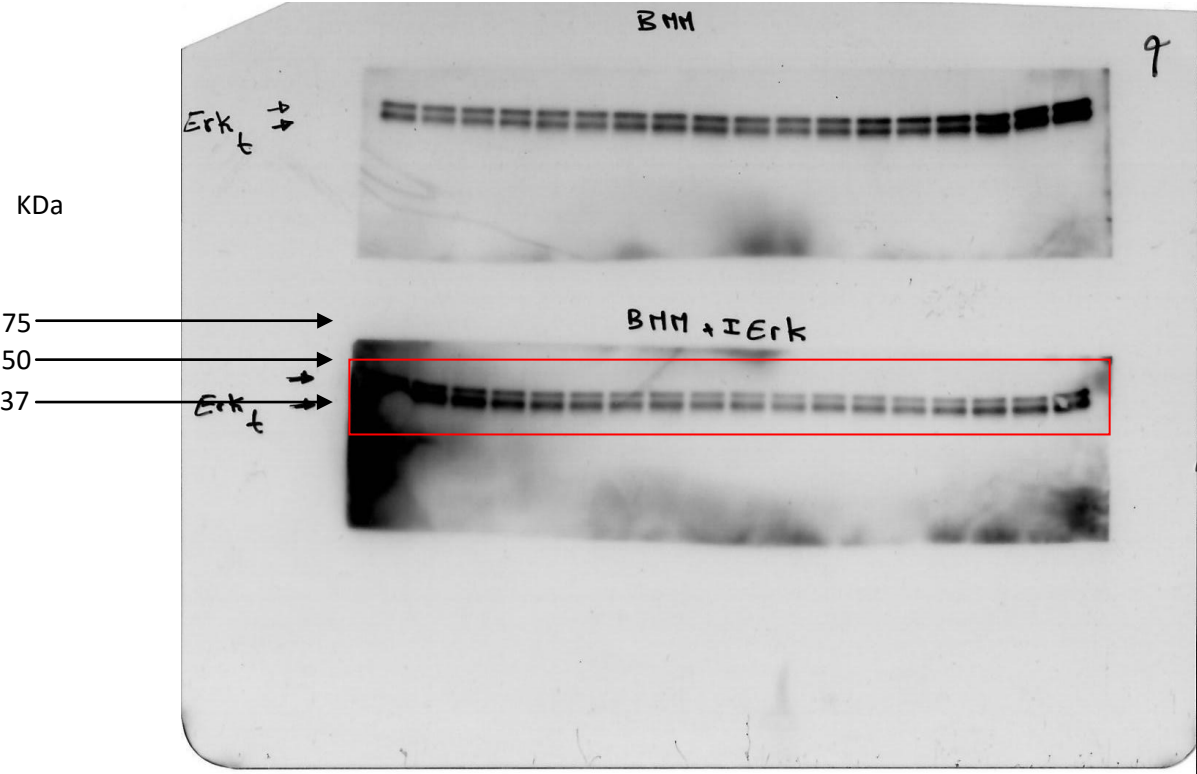





# Supplementary Figure 5b

IB: AKT (Vehicle)

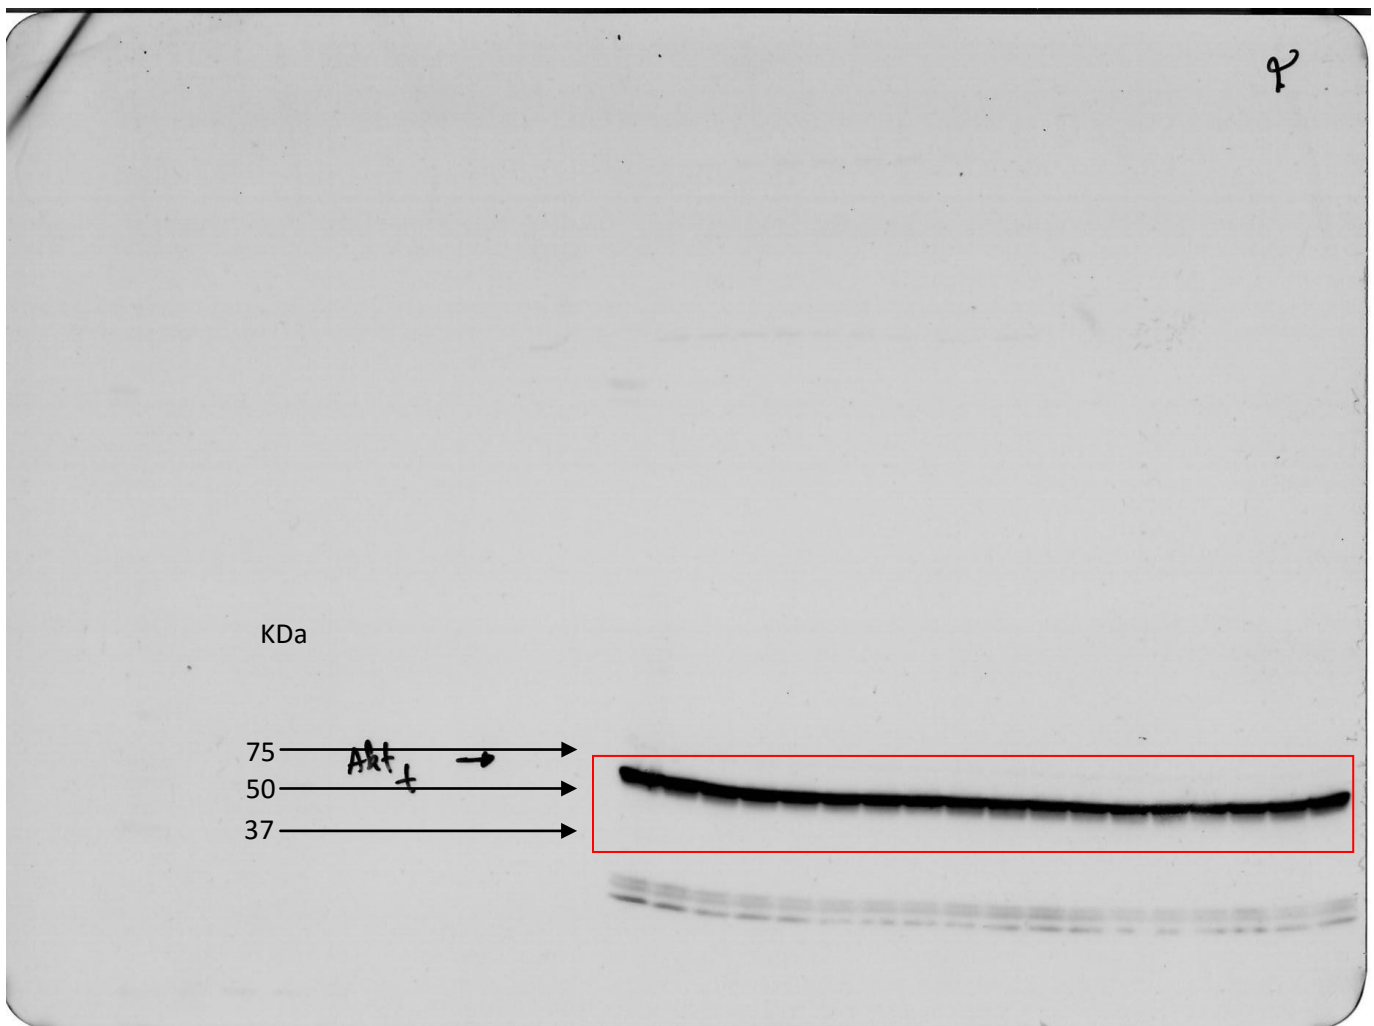

# Supplementary Figure 5b

IB : ERK (PKC inhibitor)

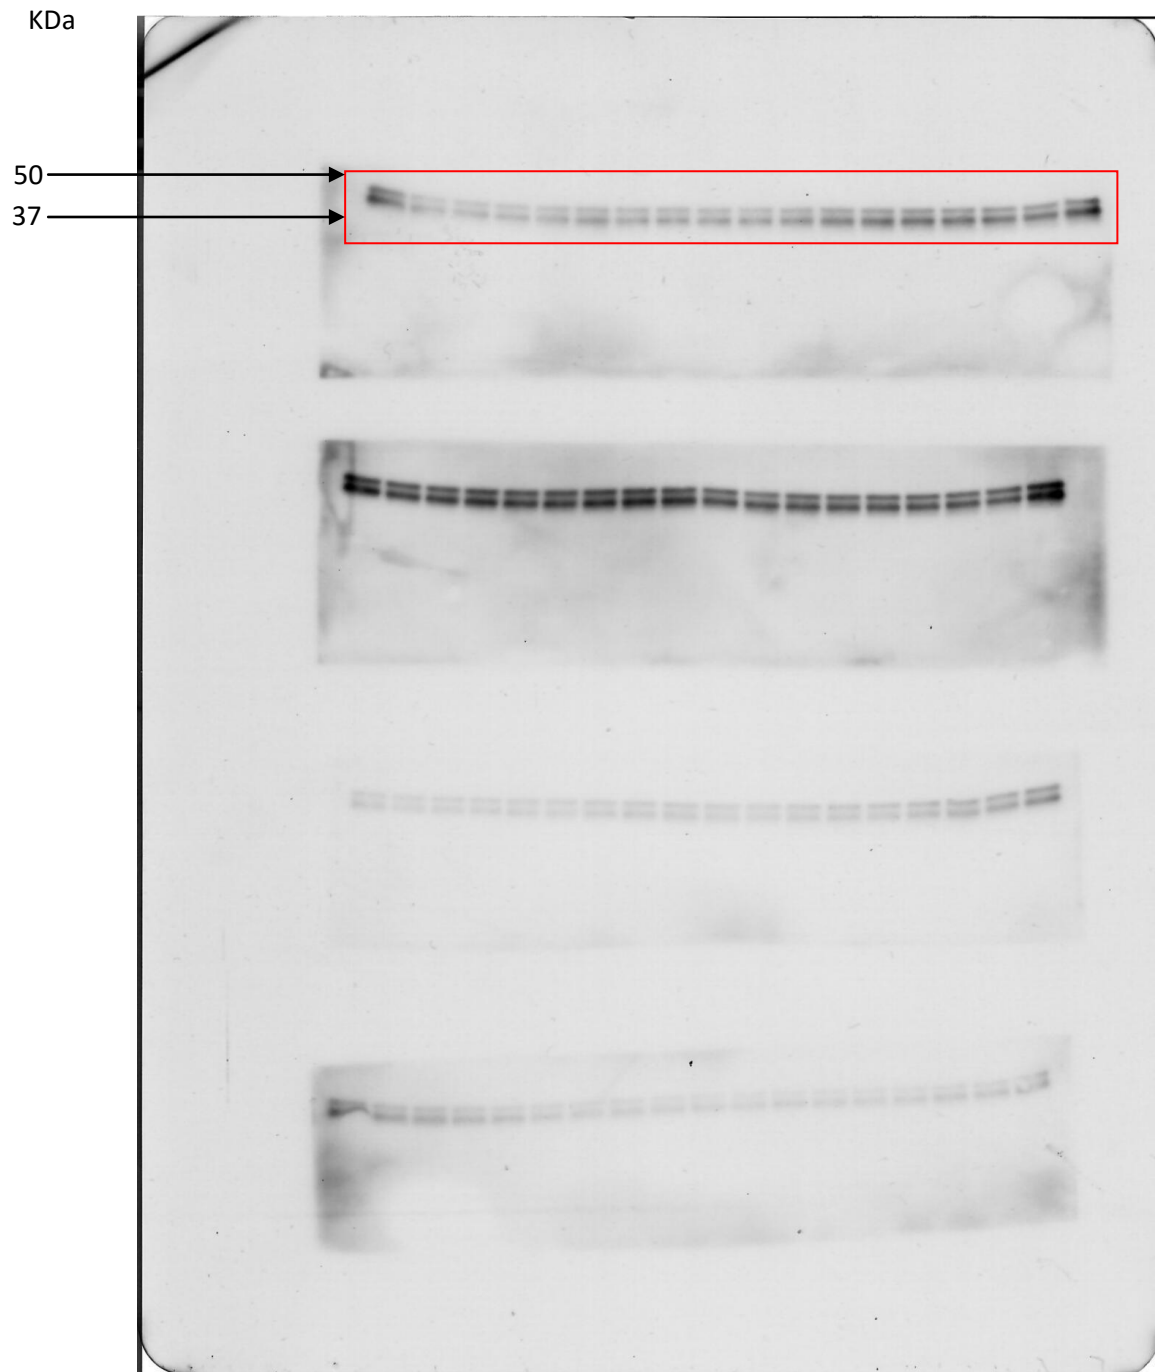

# Supplementary Figure 5b

IB : ERK (PI3k inhibitor)

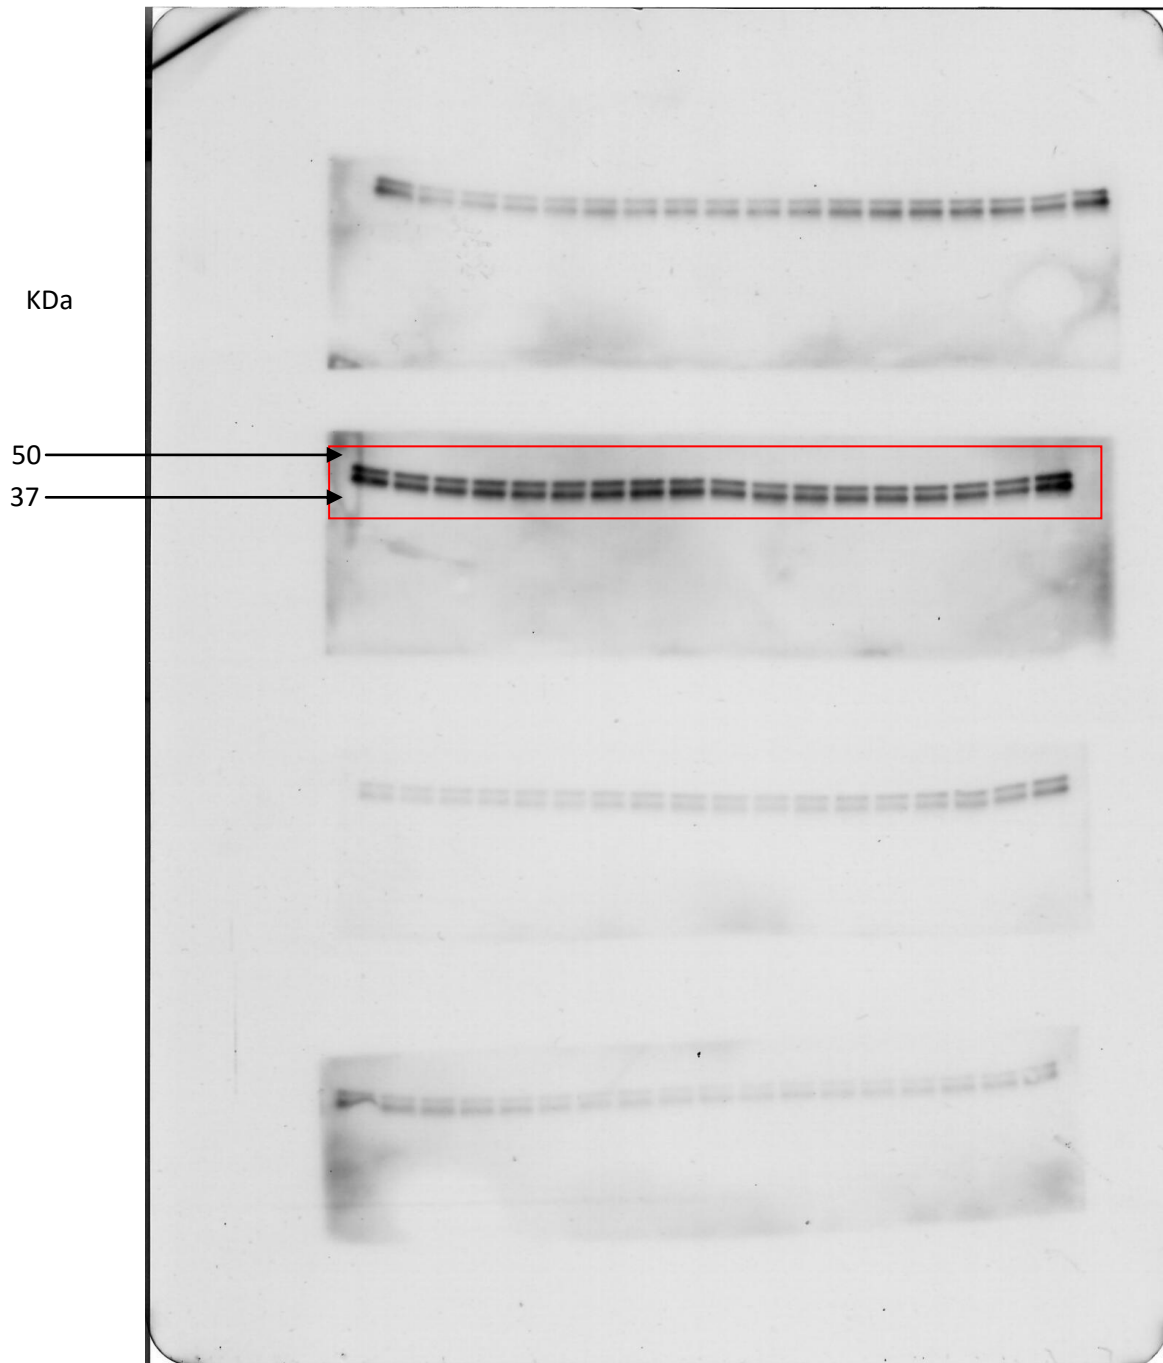

# Supplementary Figure 5b

IB : PKC (ERK inhibitor)

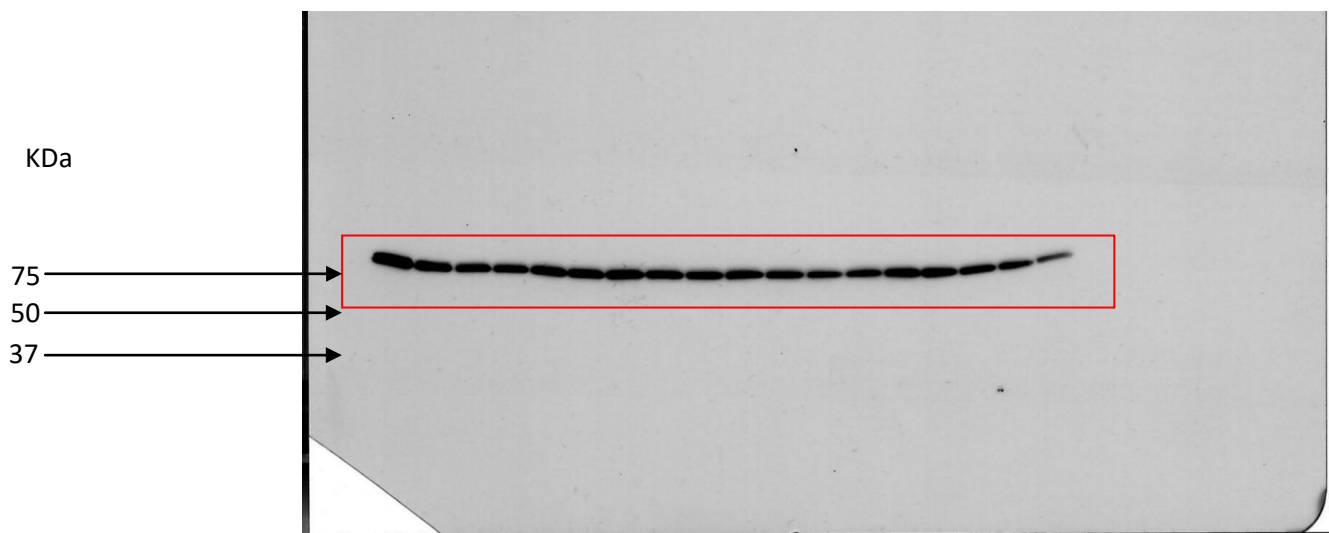

# Supplementary Figure 5b

IB : AKT (ERK inhibitor)

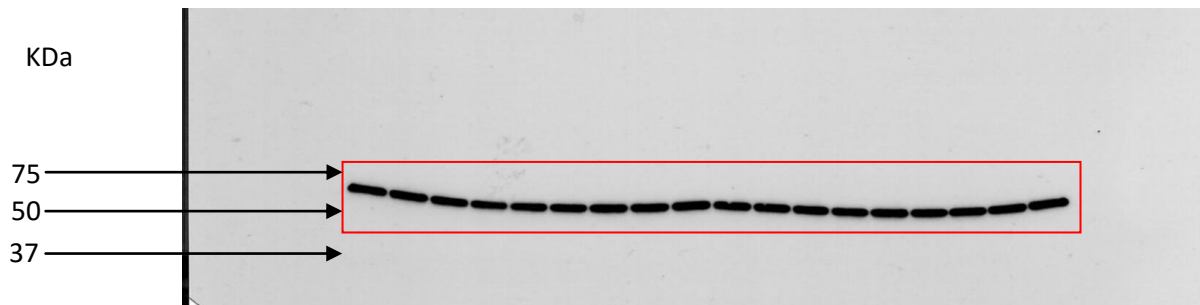

Supplementary Figure 5b

IB : SHP-1 (PKC inhibitor)

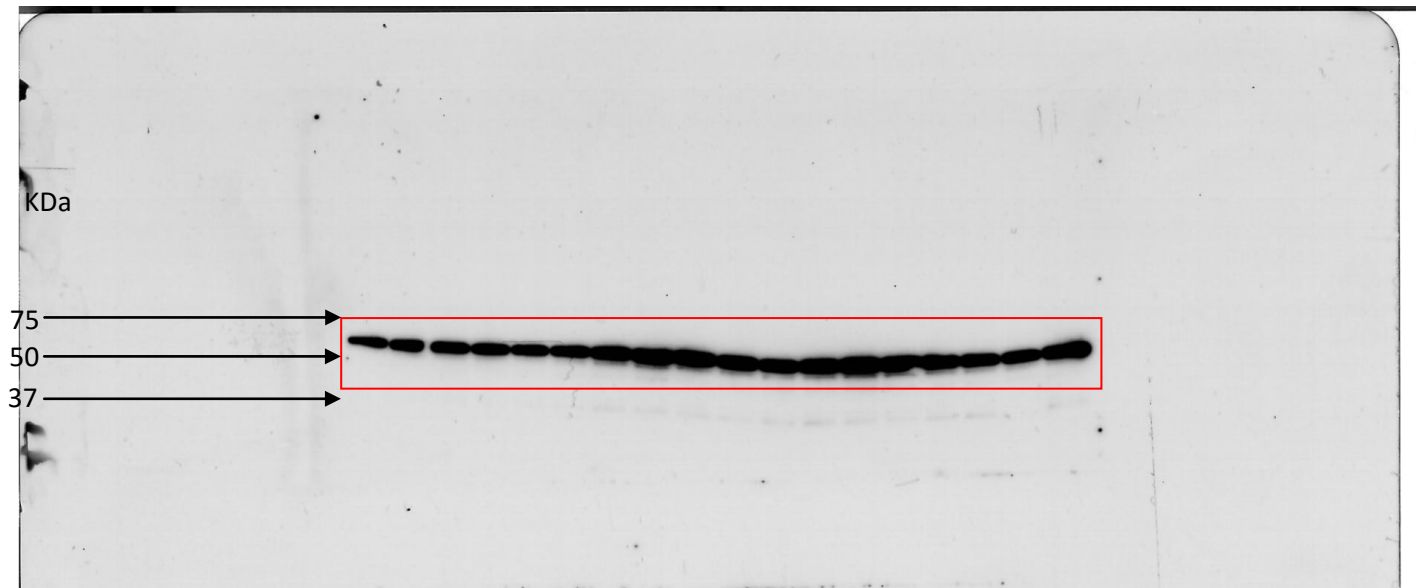

### **Supplementary References:**

1. Pfirsch-Maisonnas, S., *et al.* Inhibitory ITAM signaling traps activating receptors with the phosphatase SHP-1 to form polarized "inhibisome" clusters. *Sci Signal* **4**, ra24 (2011).
